# Supplementary material for: Diet Modifies Pioglitazone's Influence on Hepatic PPARγ-Regulated Mitochondrial Gene Expression
Source: PPAR Res. 2020 Sep 10;2020:3817573. doi: 10.1155/2020/3817573 (PMC7501566; doi:10.1155/2020/3817573)
Supplement: Supplementary Materials — Supplementary Figure S1: immunoblot analysis of the anti-RXRα/β/γ (Santa Cruz sc-774) antibody that was used for the ChIP-Seq studies reported here. The predominant detectable band in all liver samples (i.e., from control, Pio-treated, HFD-treated, and HFD-Pio-treated mice) is ~53 kDa band, which is the molecular weight of RXR, and accounts for >50% of the total detected signal in each lane (average 81% across all samples, as assessed using Odyssey Infrared Imaging System Application Software Version 3.0.21, Licor Biosciences), which is consistent with the ENCODE and modENCODE guidelines [37, 61]. Supplementary Figure S2: the left panel shows initial body weights (in grams) of WT and KO mice (as designated) that were subsequently assigned to the indicated experimental groups (no significant differences between groups). The right panel shows a summary of initial body weights in all WT versus all KO mice (p < 0.05). Supplementary Figure S3: summary of RT-qPCR based analyses of exemplar genes whose RNA-Seq based patterns of expression are depicted in Figure 3. Supplementary Table S1: gene-specific oligonucleotide primers for RT-qPCR. Supplementary Table S2: RNA-Seq, ChIP-Seq, and BETA Analyses Results—see excel Table S2. This excel spreadsheet contains (A) List of Experimental Groups, (B) a merged summary of all RNA-Seq differential expression analyses, summaries of differentially RXR-bound peaks identified by ChIP-Seq analyses of liver samples from wildtype (C) Pio vs. control or (D) HFD-Pio-treated vs. HFD-treated mice, and (E) summary lists from BETA analyses of RNA- and ChIP-Seq data from comparisons of Pio vs. control and HFD-Pio vs. HFD (including rank, Gene name, and rank product). Supplementary Table S3: GAGE results—see excel Table S3: this excel spreadsheet contains GAGE gene set expression perturbation test results for all comparisons between groups conducted by Limma. Log 2 fold changes of all genes within specific gene sets were compared to all those outsi [file 3817573.f1.zip]

Archive with 3 entries (3 files):
- 20200818 PPAR Research Supporting Info Fig S1-S3 Tables S1, S4-S5 FINAL SUBMITTED.docx
- Supplementary Table S2 - RNA-Seq, ChIP-Seq, BETA.xlsx
- Supplementary Table S3 - GAGE Results.xlsx
