# Supplementary material for: Diet Modifies Pioglitazone's Influence on Hepatic PPARγ-Regulated Mitochondrial Gene Expression
Source: PPAR Res. 2020 Sep 10;2020:3817573. doi: 10.1155/2020/3817573 (PMC7501566; doi:10.1155/2020/3817573)
Supplement: Supplementary Materials — Supplementary Figure S1: immunoblot analysis of the anti-RXRα/β/γ (Santa Cruz sc-774) antibody that was used for the ChIP-Seq studies reported here. The predominant detectable band in all liver samples (i.e., from control, Pio-treated, HFD-treated, and HFD-Pio-treated mice) is ~53 kDa band, which is the molecular weight of RXR, and accounts for >50% of the total detected signal in each lane (average 81% across all samples, as assessed using Odyssey Infrared Imaging System Application Software Version 3.0.21, Licor Biosciences), which is consistent with the ENCODE and modENCODE guidelines [37, 61]. Supplementary Figure S2: the left panel shows initial body weights (in grams) of WT and KO mice (as designated) that were subsequently assigned to the indicated experimental groups (no significant differences between groups). The right panel shows a summary of initial body weights in all WT versus all KO mice (p < 0.05). Supplementary Figure S3: summary of RT-qPCR based analyses of exemplar genes whose RNA-Seq based patterns of expression are depicted in Figure 3. Supplementary Table S1: gene-specific oligonucleotide primers for RT-qPCR. Supplementary Table S2: RNA-Seq, ChIP-Seq, and BETA Analyses Results—see excel Table S2. This excel spreadsheet contains (A) List of Experimental Groups, (B) a merged summary of all RNA-Seq differential expression analyses, summaries of differentially RXR-bound peaks identified by ChIP-Seq analyses of liver samples from wildtype (C) Pio vs. control or (D) HFD-Pio-treated vs. HFD-treated mice, and (E) summary lists from BETA analyses of RNA- and ChIP-Seq data from comparisons of Pio vs. control and HFD-Pio vs. HFD (including rank, Gene name, and rank product). Supplementary Table S3: GAGE results—see excel Table S3: this excel spreadsheet contains GAGE gene set expression perturbation test results for all comparisons between groups conducted by Limma. Log 2 fold changes of all genes within specific gene sets were compared to all those outsi [file 3817573.f1.zip › Supplementary Table S2 - RNA-Seq, ChIP-Seq, BETA.xlsx]

## Sheet: A. List of Experimental Groups
Group Name in Manuscript Text and Figures	Group Name in RNA-Seq Table	Comparisons in Table	Data elements listed for each comparison
Wildtype Control	Control_WT	Control_KO-Control_WT_logFC	log fold change
Wildtype Pio	Pio_WT	HFD_KO-Control_KO_logFC	confidence interval left
Wildtype HFD	HFD_WT	HFD_KO-HFD_WT_logFC	confidence interval right
Wildtype HFD-Pio	HFD_Pio_WT	HFD_Pio_KO-HFD_KO_logFC	p value
KO Control	Control_KO	HFD_Pio_KO-HFD_Pio_WT_logFC	q value
KO Pio	Pio_KO	HFD_Pio_KO-Pio_KO_logFC
KO HFD	HFD_KO	HFD_Pio_WT-HFD_WT_logFC
KO HFD-Pio	HFD_Pio_KO	HFD_Pio_WT-Pio_WT_logFC
		HFD_WT-Control_WT_logFC
		Pio_KO-Control_KO_logFC
		Pio_KO-Pio_WT_logFC
		Pio_WT-Control_WT_logFC

## Sheet: B. RNA-Seq_merged_diff_expr
Feature_ID	entrezgene	external_gene_name	gene_biotype	external_gene_source	transcript_count	description	Control_KO-Control_WT_logFC	Control_KO-Control_WT_CI.L	Control_KO-Control_WT_CI.R	Control_KO-Control_WT_P.Value	Control_KO-Control_WT_adj.P.Val	HFD_KO-Control_KO_logFC	HFD_KO-Control_KO_CI.L	HFD_KO-Control_KO_CI.R	HFD_KO-Control_KO_P.Value	HFD_KO-Control_KO_adj.P.Val	HFD_KO-HFD_WT_logFC	HFD_KO-HFD_WT_CI.L	HFD_KO-HFD_WT_CI.R	HFD_KO-HFD_WT_P.Value	HFD_KO-HFD_WT_adj.P.Val	HFD_Pio_KO-HFD_KO_logFC	HFD_Pio_KO-HFD_KO_CI.L	HFD_Pio_KO-HFD_KO_CI.R	HFD_Pio_KO-HFD_KO_P.Value	HFD_Pio_KO-HFD_KO_adj.P.Val	HFD_Pio_KO-HFD_Pio_WT_logFC	HFD_Pio_KO-HFD_Pio_WT_CI.L	HFD_Pio_KO-HFD_Pio_WT_CI.R	HFD_Pio_KO-HFD_Pio_WT_P.Value	HFD_Pio_KO-HFD_Pio_WT_adj.P.Val	HFD_Pio_KO-Pio_KO_logFC	HFD_Pio_KO-Pio_KO_CI.L	HFD_Pio_KO-Pio_KO_CI.R	HFD_Pio_KO-Pio_KO_P.Value	HFD_Pio_KO-Pio_KO_adj.P.Val	HFD_Pio_WT-HFD_WT_logFC	HFD_Pio_WT-HFD_WT_CI.L	HFD_Pio_WT-HFD_WT_CI.R	HFD_Pio_WT-HFD_WT_P.Value	HFD_Pio_WT-HFD_WT_adj.P.Val	HFD_Pio_WT-Pio_WT_logFC	HFD_Pio_WT-Pio_WT_CI.L	HFD_Pio_WT-Pio_WT_CI.R	HFD_Pio_WT-Pio_WT_P.Value	HFD_Pio_WT-Pio_WT_adj.P.Val	HFD_WT-Control_WT_logFC	HFD_WT-Control_WT_CI.L	HFD_WT-Control_WT_CI.R
ENSMUSG00000000001	14679	Gnai3	protein_coding	MGI Symbol	1	guanine nucleotide binding protein (G protein), alpha inhibiting 3 [Source:MGI Symbol;Acc:MGI:95773]	0.693969	0.518599	0.869339	1.28466e-09	2.10921e-08	-0.238102	-0.384201	-0.0920024	0.00213133	0.0507882	0.745552	0.558429	0.932674	1.09098e-09	2.28894e-08	0.0642727	-0.0725965	0.201142	0.34756	0.979365	0.598244	0.448277	0.74821	1.05944e-09	1.54249e-08	-0.0207776	-0.176834	0.135279	0.788851	0.960898	0.211581	0.0146753	0.408486	0.0359161	0.176172	0.220313	0.0454656	0.395161	0.0149312	0.0598354	-0.289685	-0.500456	-0.0789134
ENSMUSG00000000028	12544	Cdc45	protein_coding	MGI Symbol	3	Cell division control [Source:UniProtKB/Swiss-Prot;Acc:Q9Z1X9]	-0.292821	-0.816185	0.230543	0.264257	0.339658	-0.369388	-0.866213	0.127437	0.14045	0.436369	-0.937904	-1.57039	-0.305421	0.00474848	0.011182	0.187871	-0.289294	0.665037	0.430128	0.983698	-0.702002	-1.16794	-0.236063	0.00418106	0.00881914	-0.0408128	-0.561865	0.480239	0.874772	0.978861	-0.0480311	-0.672089	0.576027	0.876931	0.950009	-0.236907	-0.729525	0.255711	0.3362	0.514454	0.275695	-0.377841	0.929232
ENSMUSG00000000031	14955	H19	lincRNA	MGI Symbol	7		-0.358601	-1.67498	0.957775	0.584316	0.656616	0.0573224	-1.13947	1.25412	0.923218	0.973411	-0.932356	-2.38172	0.517012	0.200503	0.278674	-0.190669	-1.32221	0.94087	0.734735	0.990955	-1.33498	-2.42009	-0.249864	0.0172746	0.0307997	0.171862	-1.15573	1.49945	0.794561	0.962911	0.211954	-1.20147	1.62538	0.762965	0.894128	-0.539754	-1.58581	0.506298	0.302601	0.48019	0.631078	-0.918501	2.18066
ENSMUSG00000000049	11818	Apoh	protein_coding	MGI Symbol	4	Beta-2-glycoprotein 1 [Source:UniProtKB/Swiss-Prot;Acc:Q01339]	-0.0198473	-0.235734	0.19604	0.853257	0.884518	-0.0790838	-0.255897	0.0977288	0.370687	0.682624	-0.24948	-0.478605	-0.0203562	0.0336551	0.0610189	-0.0340531	-0.200057	0.131951	0.680095	0.988789	-0.172887	-0.356926	0.0111526	0.0647909	0.0990279	0.118791	-0.0692241	0.306806	0.208469	0.675868	-0.110647	-0.353157	0.131863	0.361263	0.618958	0.335545	0.11953	0.55156	0.00324666	0.0204285	0.150549	-0.109917	0.411015
ENSMUSG00000000056	67608	Narf	protein_coding	MGI Symbol	3	Nuclear prelamin A recognition factor [Source:UniProtKB/Swiss-Prot;Acc:Q9CYQ7]	0.392041	0.138096	0.645987	0.00341982	0.007639	0.0201783	-0.190177	0.230534	0.846966	0.94184	0.196791	-0.0792327	0.472815	0.157008	0.227042	0.0984248	-0.0999466	0.296796	0.321296	0.975895	0.217033	-0.00262748	0.436693	0.0526616	0.0824095	0.212499	-0.0125104	0.437508	0.0634422	0.425159	0.078183	-0.213517	0.369883	0.590362	0.789796	0.0380894	-0.220797	0.296976	0.767304	0.860756	0.215429	-0.0951002	0.525957
ENSMUSG00000000058	12390	Cav2	protein_coding	MGI Symbol	3	Caveolin-2 [Source:UniProtKB/Swiss-Prot;Acc:Q9WVC3]	1.15118	0.716199	1.58617	4.55719e-06	2.22497e-05	0.333606	0.03025	0.636962	0.0320229	0.205678	2.07154	1.41881	2.72426	1.62866e-07	1.44083e-06	0.0391211	-0.229611	0.307854	0.769685	0.990955	1.41634	1.04569	1.787	2.9288e-09	3.60192e-08	0.00746834	-0.293593	0.30853	0.960186	0.993948	0.694314	-0.0065603	1.39519	0.0520725	0.21723	0.550304	0.00394772	1.09666	0.0484497	0.136816	-0.586747	-1.3101	0.136608
ENSMUSG00000000078	23849	Klf6	protein_coding	MGI Symbol	3	Kruppel like factor 6 [Source:HGNC Symbol;Acc:HGNC:2235]	0.290294	-0.243082	0.82367	0.277272	0.35397	-0.0674496	-0.514632	0.379733	0.761627	0.904948	0.42373	-0.258919	1.10638	0.216405	0.296305	0.121743	-0.295202	0.538687	0.557726	0.983698	0.521563	0.0392868	1.00384	0.0348049	0.0569284	0.167695	-0.305536	0.640926	0.477291	0.86813	0.0239105	-0.700491	0.748312	0.947042	0.978537	-0.195704	-0.77775	0.386342	0.499967	0.664814	-0.200886	-0.942862	0.541089
ENSMUSG00000000085	29871	Scmh1	protein_coding	MGI Symbol	14	Polycomb protein SCMH1 [Source:UniProtKB/Swiss-Prot;Acc:Q8K214]	-0.0439814	-0.286988	0.199025	0.715938	0.774115	0.00876322	-0.200553	0.21808	0.93286	0.975366	0.188265	-0.118213	0.494744	0.221103	0.301434	-0.0832676	-0.28045	0.113915	0.397736	0.983698	0.12428	-0.098304	0.346864	0.265221	0.335518	-0.0745329	-0.296481	0.147415	0.500502	0.879477	-0.019282	-0.342688	0.304124	0.904506	0.96223	-0.421222	-0.676856	-0.165588	0.00192737	0.0139759	-0.223484	-0.553889	0.106922
ENSMUSG00000000088	12858	Cox5a	protein_coding	MGI Symbol	3	Cytochrome c oxidase subunit 5A, mitochondrial [Source:UniProtKB/Swiss-Prot;Acc:P12787]	-0.885468	-1.15825	-0.612684	1.03291e-07	8.43141e-07	-0.0836534	-0.3007	0.133394	0.439842	0.734785	-0.943614	-1.23267	-0.654555	9.20274e-08	8.97579e-07	0.0787486	-0.125604	0.283101	0.439912	0.983698	-0.970058	-1.20308	-0.737033	3.75217e-10	6.41177e-09	-0.059003	-0.292224	0.174219	0.611296	0.919711	0.105192	-0.2048	0.415185	0.496042	0.72632	0.338051	0.0596006	0.616501	0.0186887	0.0702896	-0.0255077	-0.358459	0.307444
ENSMUSG00000000093	21385	Tbx2	protein_coding	MGI Symbol	1	T-box transcription factor TBX2 [Source:UniProtKB/Swiss-Prot;Acc:Q60707]	-0.292706	-0.694767	0.109356	0.14866	0.20791	0.305706	-0.0478191	0.659231	0.0880433	0.347425	0.0411149	-0.448606	0.530836	0.86586	0.899747	0.056466	-0.257764	0.370696	0.717876	0.990955	0.182505	-0.167456	0.532466	0.297541	0.370135	-0.0777153	-0.424754	0.269323	0.652687	0.931918	-0.0849244	-0.598304	0.428455	0.739402	0.881487	-0.516164	-0.913058	-0.11927	0.0122108	0.0521822	-0.0281143	-0.553947	0.497718
ENSMUSG00000000120	18053	Ngfr	protein_coding	MGI Symbol	1	nerve growth factor receptor [Source:HGNC Symbol;Acc:HGNC:7809]	0.044611	-0.348347	0.437569	0.819352	0.858219	0.11056	-0.22486	0.445981	0.50839	0.773589	0.331372	-0.172475	0.835219	0.190832	0.267494	0.168179	-0.134949	0.471307	0.268211	0.965053	0.29488	-0.0463743	0.636135	0.088266	0.129923	0.272486	-0.0746289	0.619602	0.120226	0.555509	0.204671	-0.322994	0.732335	0.436947	0.682949	-0.186202	-0.593184	0.220779	0.359949	0.537625	-0.176201	-0.720049	0.367648
ENSMUSG00000000126	216795	Wnt9a	protein_coding	MGI Symbol	2	wingless-type MMTV integration site family, member 9A [Source:MGI Symbol;Acc:MGI:2446084]	-0.646294	-1.25774	-0.0348454	0.0388703	0.0648021	0.284624	-0.270444	0.839693	0.305583	0.628065	-1.14378	-1.7709	-0.516663	0.000705441	0.00209839	0.50321	0.0311441	0.975276	0.0373312	0.787487	-0.240092	-0.708175	0.227992	0.305442	0.378257	0.700623	0.145926	1.25532	0.0147086	0.197744	-0.40048	-1.02461	0.223646	0.201614	0.453383	0.634181	0.0328696	1.23549	0.0392775	0.118655	0.782113	0.104583	1.45964
ENSMUSG00000000127	14158	Fer	protein_coding	MGI Symbol	2	Tyrosine-protein kinase Fer [Source:UniProtKB/Swiss-Prot;Acc:P70451]	0.644672	0.419792	0.869552	1.13214e-06	6.60517e-06	0.191031	0.0149464	0.367116	0.0342678	0.2138	0.776455	0.49216	1.06075	2.66932e-06	1.60567e-05	-0.0641069	-0.226291	0.0980768	0.428331	0.983698	0.835174	0.635092	1.03525	3.50942e-10	6.08433e-09	0.122882	-0.0635539	0.309318	0.189892	0.652244	-0.122826	-0.430319	0.184668	0.423518	0.671497	-0.394039	-0.636655	-0.151424	0.00219869	0.0153518	0.0592486	-0.257593	0.37609
ENSMUSG00000000131	74204	Xpo6	protein_coding	MGI Symbol	20	exportin 6 [Source:MGI Symbol;Acc:MGI:2429950]	-0.447481	-0.601226	-0.293736	8.58069e-07	5.18555e-06	0.030754	-0.0953697	0.156878	0.624203	0.840142	-0.599716	-0.76551	-0.433921	1.02261e-08	1.42649e-07	-0.0950759	-0.213688	0.0235364	0.112847	0.918892	-0.657361	-0.789548	-0.525175	3.62574e-12	1.36486e-10	0.0344044	-0.100272	0.16908	0.607834	0.918086	-0.0374302	-0.213192	0.138331	0.668632	0.840693	0.0173907	-0.139637	0.174418	0.823694	0.898273	0.182989	-0.00467646	0.370654
ENSMUSG00000000134	209446	Tfe3	protein_coding	MGI Symbol	14	Transcription factor E3 [Source:UniProtKB/Swiss-Prot;Acc:Q64092]	-0.553158	-0.749594	-0.356723	1.56099e-06	8.7495e-06	-0.16706	-0.329269	-0.00485011	0.0438544	0.245112	-0.59442	-0.807636	-0.381203	1.86484e-06	1.18487e-05	0.0872762	-0.065361	0.239913	0.254084	0.96496	-0.192486	-0.361439	-0.0235332	0.0266636	0.0451296	-0.0600006	-0.232776	0.112774	0.486085	0.872945	-0.314657	-0.539842	-0.0894721	0.00745152	0.0714475	-0.23687	-0.436464	-0.0372773	0.0213059	0.0770108	-0.125798	-0.366082	0.114486
ENSMUSG00000000142	12006	Axin2	protein_coding	MGI Symbol	7	Axin-2 [Source:UniProtKB/Swiss-Prot;Acc:O88566]	-0.359301	-0.698924	-0.0196791	0.0387039	0.0645744	0.154953	-0.146788	0.456693	0.30488	0.627282	-0.105711	-0.521971	0.310549	0.609946	0.68828	0.0814712	-0.192453	0.355395	0.550454	0.983698	-0.177494	-0.469737	0.114748	0.226254	0.293467	-0.170729	-0.469543	0.128086	0.25444	0.726085	0.153255	-0.275282	0.581791	0.473274	0.710365	0.113554	-0.233491	0.460599	0.511484	0.673809	-0.0986379	-0.543124	0.345849
ENSMUSG00000000148	231841	Brat1	protein_coding	MGI Symbol	6	BRCA1-associated ATM activator 1 [Source:UniProtKB/Swiss-Prot;Acc:Q8C3R1]	-0.293451	-0.510323	-0.0765798	0.00935731	0.0187239	0.0584348	-0.131271	0.24814	0.5364	0.790898	-0.0985686	-0.361374	0.164236	0.452127	0.541577	0.0615501	-0.113814	0.236915	0.481472	0.983698	-0.177398	-0.367258	0.0124626	0.066176	0.100955	-0.036414	-0.232138	0.15931	0.708371	0.945719	0.140379	-0.132312	0.413071	0.303711	0.565652	0.336763	0.105639	0.567887	0.00544754	0.0291504	-0.136448	-0.419488	0.146592
ENSMUSG00000000149	14673	Gna12	protein_coding	MGI Symbol	2	guanine nucleotide binding protein, alpha 12 [Source:MGI Symbol;Acc:MGI:95767]	0.363426	0.0784391	0.648412	0.0138497	0.0263039	-0.085454	-0.321602	0.150694	0.468078	0.75114	-0.519624	-0.829132	-0.210117	0.00161844	0.00437252	-0.153443	-0.374314	0.0674276	0.167601	0.934297	-0.867381	-1.11732	-0.617446	2.53948e-08	2.26046e-07	0.406754	0.159377	0.654131	0.00196534	0.0654457	0.194314	-0.136562	0.525189	0.241677	0.500265	0.770835	0.476821	1.06485	5.3269e-06	0.000270236	0.797596	0.449392	1.1458
ENSMUSG00000000154	18400	Slc22a18	protein_coding	MGI Symbol	5	solute carrier family 22 (organic cation transporter), member 18 [Source:MGI Symbol;Acc:MGI:1336884]	-0.552843	-0.757219	-0.348467	3.14888e-06	1.60433e-05	0.0372671	-0.127557	0.202091	0.649564	0.853115	-0.537583	-0.754576	-0.320589	1.32078e-05	6.42915e-05	-0.0797383	-0.234828	0.0753518	0.304312	0.975777	-0.649966	-0.824452	-0.47548	5.26958e-09	5.94063e-08	0.133659	-0.0417965	0.309115	0.131227	0.575026	0.0326446	-0.19861	0.263899	0.776471	0.899075	0.265311	0.0578136	0.472808	0.0136189	0.0561165	0.0220069	-0.226365	0.270379
ENSMUSG00000000157	16415	Itgb2l	protein_coding	MGI Symbol	4	Integrin beta-2-like protein [Source:UniProtKB/Swiss-Prot;Acc:Q3UV74]	0.189914	-0.159676	0.539505	0.278151	0.354917	0.251757	-0.0366131	0.540128	0.085153	0.343655	0.361438	-0.07294	0.795816	0.100228	0.155682	-0.218616	-0.485431	0.0481998	0.105343	0.906616	-0.0580321	-0.354013	0.237948	0.693471	0.747457	0.100672	-0.212031	0.413375	0.518256	0.887823	0.200854	-0.252023	0.653732	0.374688	0.629831	0.370882	-0.00364678	0.745411	0.0521575	0.144121	0.080234	-0.396987	0.557455
ENSMUSG00000000159	72058	Igsf5	protein_coding	MGI Symbol	6		-0.0610938	-0.256268	0.134081	0.529852	0.607074	-0.242112	-0.406757	-0.0774674	0.00507229	0.0775899	-0.483653	-0.702514	-0.264792	6.96714e-05	0.000275609	0.0694963	-0.0861546	0.225147	0.37152	0.983698	-0.395139	-0.565079	-0.2252	3.41643e-05	0.000122804	0.0197976	-0.155923	0.195518	0.820697	0.968156	-0.0190173	-0.248261	0.210226	0.86744	0.944612	0.0677461	-0.13191	0.267402	0.496073	0.661447	0.180447	-0.0622161	0.42311
ENSMUSG00000000168	235339	Dlat	protein_coding	MGI Symbol	6	Dihydrolipoyllysine-residue acetyltransferase component of pyruvate dehydrogenase complex, mitochondrial [Source:UniProtKB/Swiss-Prot;Acc:Q8BMF4]	-0.410012	-0.734425	-0.0855995	0.0146517	0.0275891	-0.142118	-0.408241	0.124004	0.286255	0.610961	0.269724	-0.0878693	0.627317	0.134953	0.199821	0.16929	-0.0810808	0.419661	0.178952	0.93701	-0.0592225	-0.337063	0.218618	0.668351	0.725734	-0.411231	-0.696873	-0.125588	0.00597168	0.118403	0.498236	0.1209	0.875572	0.0110483	0.0908699	-0.678822	-1.01086	-0.346787	0.00019084	0.00277853	-0.821854	-1.22471	-0.418996
ENSMUSG00000000171	66925	Sdhd	protein_coding	MGI Symbol	1	succinate dehydrogenase complex, subunit D, integral membrane protein [Source:MGI Symbol;Acc:MGI:1914175]	-0.0582126	-0.295662	0.179236	0.622336	0.690557	-0.141452	-0.33521	0.052305	0.147559	0.447606	0.138862	-0.10849	0.386213	0.262669	0.347487	0.035002	-0.146879	0.216883	0.698844	0.990173	-0.335629	-0.538855	-0.132403	0.00188731	0.00433661	-0.193199	-0.401789	0.0153908	0.0684669	0.438235	0.509493	0.246048	0.772937	0.000369492	0.0131468	0.366806	0.127556	0.606056	0.00362337	0.0220716	-0.338527	-0.62141	-0.0556435
ENSMUSG00000000184	12444	Ccnd2	protein_coding	MGI Symbol	8	G1/S-specific cyclin-D2 [Source:UniProtKB/Swiss-Prot;Acc:P30280]	0.243235	0.0422084	0.444263	0.0190606	0.0346695	0.154692	-0.011341	0.320725	0.0669181	0.306549	0.752539	0.493231	1.01185	9.05101e-07	6.26909e-06	-0.134985	-0.289989	0.0200185	0.0859055	0.877681	0.385811	0.205477	0.566144	0.000107254	0.000338988	0.0590329	-0.118547	0.236613	0.5048	0.88294	0.231744	-0.0434563	0.506943	0.0963518	0.303753	0.142258	-0.0812102	0.365726	0.205124	0.372267	-0.354612	-0.637606	-0.0716176
ENSMUSG00000000194	277463	Gpr107	protein_coding	MGI Symbol	11	G protein-coupled receptor 107 [Source:MGI Symbol;Acc:MGI:2139054]	-0.226013	-0.355638	-0.0963877	0.00112085	0.00284139	0.0166296	-0.0919234	0.125183	0.758015	0.903077	-0.182375	-0.327536	-0.0372149	0.0152026	0.0307389	-0.0580567	-0.16009	0.043977	0.256371	0.96496	-0.22588	-0.338676	-0.113084	0.000245484	0.000706425	0.0105556	-0.105226	0.126337	0.854464	0.975819	-0.0145523	-0.167469	0.138365	0.848164	0.935457	0.152007	0.0184833	0.285531	0.026771	0.0909978	-0.027008	-0.188533	0.134517
ENSMUSG00000000204	20558	Slfn4	protein_coding	MGI Symbol	3	schlafen 4 [Source:MGI Symbol;Acc:MGI:1329010]	1.1033	0.113368	2.09324	0.0299146	0.051498	-0.376843	-1.14565	0.391964	0.327104	0.648268	0.0347511	-1.11411	1.18361	0.951462	0.965136	0.709442	0.0123346	1.40655	0.0462783	0.811479	1.50521	0.646518	2.3639	0.00106259	0.00260473	-0.573595	-1.23968	0.0924876	0.0893188	0.488826	-0.761017	-2.01452	0.492486	0.226435	0.48359	-0.613043	-1.68198	0.455894	0.252685	0.425797	0.691707	-0.615496	1.99891
ENSMUSG00000000247	16870	Lhx2	protein_coding	MGI Symbol	7	LIM/homeobox protein Lhx2 [Source:UniProtKB/Swiss-Prot;Acc:Q9Z0S2]	0.105927	-0.199469	0.411322	0.486615	0.56654	0.186375	-0.0707635	0.443513	0.150408	0.45227	-0.385146	-0.720263	-0.0500299	0.0254432	0.0479719	-0.234648	-0.475783	0.00648766	0.0561591	0.830977	-0.48229	-0.736101	-0.22848	0.000451159	0.00121965	-0.122739	-0.39624	0.150762	0.369107	0.801486	-0.137504	-0.481853	0.206845	0.423664	0.671578	-0.100972	-0.383733	0.181788	0.473925	0.644218	0.677448	0.304019	1.05088
ENSMUSG00000000253	66355	Gmpr	protein_coding	MGI Symbol	4	guanosine monophosphate reductase [Source:MGI Symbol;Acc:MGI:1913605]	-0.135713	-0.612749	0.341323	0.567837	0.640937	0.161498	-0.254436	0.577433	0.43648	0.732278	0.18557	-0.417946	0.789086	0.537122	0.62204	-0.0253972	-0.40729	0.356495	0.893548	0.998135	-0.27134	-0.674431	0.131751	0.180848	0.242206	0.212339	-0.23198	0.656658	0.339202	0.782132	0.431512	-0.185636	1.04866	0.164945	0.40617	0.347515	-0.143636	0.838666	0.160087	0.314389	-0.159784	-0.806927	0.487358
ENSMUSG00000000266	23947	Mid2	protein_coding	MGI Symbol	5	Mus musculus midline 2 (Mid2), transcript variant 2, mRNA. [Source:RefSeq mRNA;Acc:NM_001358366]	0.656563	0.411855	0.90127	3.61797e-06	1.81696e-05	-0.0120286	-0.206137	0.18208	0.900767	0.964494	0.617419	0.304173	0.930665	0.000296388	0.000977943	0.0374014	-0.143638	0.218441	0.677953	0.988789	0.400768	0.192366	0.60917	0.000394186	0.00107687	-0.056419	-0.257855	0.145017	0.573826	0.910035	0.254052	-0.0757651	0.58387	0.12711	0.349888	-0.256812	-0.505336	-0.00828808	0.04319	0.126445	0.0271151	-0.319767	0.373997
ENSMUSG00000000275	217069	Trim25	protein_coding	MGI Symbol	3	E3 ubiquitin/ISG15 ligase TRIM25 [Source:UniProtKB/Swiss-Prot;Acc:Q61510]	0.466865	0.274284	0.659447	1.84251e-05	7.52001e-05	-0.0912478	-0.251388	0.0688921	0.25571	0.583261	0.319415	0.115602	0.523227	0.00300998	0.00750588	-0.0788218	-0.228889	0.0712456	0.29414	0.97334	0.179132	0.0144085	0.343855	0.0338663	0.0555962	0.0379209	-0.132295	0.208137	0.65436	0.931918	0.0614609	-0.153372	0.276294	0.565678	0.774208	0.314373	0.12227	0.506476	0.00205258	0.0146145	0.0562028	-0.173976	0.286382
ENSMUSG00000000276	56077	Dgke	protein_coding	MGI Symbol	3	Diacylglycerol kinase epsilon [Source:UniProtKB/Swiss-Prot;Acc:Q9R1C6]	-0.23697	-0.612688	0.138747	0.209247	0.27886	0.309679	-0.0178917	0.637249	0.0631806	0.298048	0.320103	-0.162851	0.803057	0.187481	0.26368	0.0832051	-0.204867	0.371277	0.561969	0.983698	-0.0213351	-0.331266	0.288596	0.889836	0.912315	-0.00460352	-0.324949	0.315742	0.976929	0.99492	0.424643	-0.0716595	0.920946	0.0913154	0.29493	0.398326	0.00383372	0.792819	0.0479248	0.135586	-0.247394	-0.764217	0.269428
ENSMUSG00000000278	74617	Scpep1	protein_coding	MGI Symbol	1	serine carboxypeptidase 1 [Source:MGI Symbol;Acc:MGI:1921867]	-0.335844	-0.592714	-0.0789733	0.0117932	0.0228595	0.568043	0.355095	0.780991	3.99068e-06	0.000977866	0.265995	-0.0169051	0.548894	0.0645619	0.107043	-0.0416037	-0.240382	0.157175	0.673988	0.988678	0.511553	0.288765	0.73434	4.09042e-05	0.000144748	0.200254	-0.0256389	0.426146	0.0806332	0.467284	-0.287162	-0.587418	0.0130943	0.0603058	0.235051	-0.475035	-0.737858	-0.212212	0.00077605	0.00735125	-0.0337952	-0.351077	0.283487
ENSMUSG00000000282	17428	Mnt	protein_coding	MGI Symbol	3	Max-binding protein MNT [Source:UniProtKB/Swiss-Prot;Acc:O08789]	-1.58666	-1.98549	-1.18783	1.13128e-09	1.89573e-08	0.149517	-0.202912	0.501945	0.39557	0.70076	-1.45531	-1.88235	-1.02827	3.74853e-08	4.28163e-07	0.471288	0.154307	0.788269	0.00465025	0.559193	-0.828253	-1.16101	-0.495499	1.22755e-05	4.9189e-05	0.0042234	-0.343616	0.352062	0.980506	0.996194	-0.155769	-0.594643	0.283105	0.476592	0.712583	-0.118724	-0.505389	0.26794	0.537694	0.69481	0.0181693	-0.447902	0.48424
ENSMUSG00000000290	16414	Itgb2	protein_coding	MGI Symbol	5		0.063133	-0.39455	0.520816	0.781438	0.827911	-0.00581244	-0.398362	0.386737	0.976229	0.991808	0.250529	-0.334013	0.835071	0.390798	0.481162	0.0664347	-0.298201	0.431071	0.714131	0.990955	0.517755	0.0930411	0.942469	0.0182398	0.0322814	-0.015009	-0.422397	0.392379	0.940901	0.992321	-0.200792	-0.82458	0.422997	0.518323	0.7425	-0.229915	-0.741803	0.281972	0.368704	0.545993	-0.193208	-0.823341	0.436925
ENSMUSG00000000296	21987	Tpd52l1	protein_coding	MGI Symbol	5	tumor protein D52-like 1 [Source:MGI Symbol;Acc:MGI:1298386]	-0.429706	-0.740189	-0.119223	0.00798423	0.0162144	0.107961	-0.171784	0.387705	0.439241	0.734533	-0.303687	-0.676468	0.0690937	0.107284	0.164537	0.0535022	-0.202529	0.309533	0.67447	0.988678	-0.246926	-0.517686	0.0238339	0.0726358	0.109637	0.136855	-0.154691	0.4284	0.347744	0.786901	-0.00325883	-0.386306	0.379788	0.98634	0.994153	-0.0786058	-0.390317	0.233106	0.612443	0.757402	-0.018058	-0.414427	0.378311
ENSMUSG00000000301	18618	Pemt	protein_coding	MGI Symbol	10	Phosphatidylethanolamine N-methyltransferase [Source:UniProtKB/Swiss-Prot;Acc:Q61907]	-0.726998	-0.952023	-0.501973	1.13717e-07	9.1899e-07	-0.0675679	-0.24729	0.112154	0.451058	0.741724	-0.747632	-0.985577	-0.509687	1.98752e-07	1.70601e-06	0.0307785	-0.138332	0.199889	0.71442	0.990955	-0.407929	-0.597295	-0.218562	9.80183e-05	0.000313692	0.0204988	-0.171987	0.212984	0.830356	0.969328	-0.308925	-0.561668	-0.0561819	0.0179573	0.119107	-0.154541	-0.381653	0.0725695	0.176265	0.336344	-0.0469335	-0.320711	0.226844
ENSMUSG00000000303	12550	Cdh1	protein_coding	MGI Symbol	3	cadherin 1 [Source:HGNC Symbol;Acc:HGNC:1748]	-0.768776	-1.35878	-0.178775	0.0120587	0.0232942	0.31921	-0.163796	0.802217	0.188733	0.503508	0.348444	-0.296109	0.992997	0.280464	0.367176	0.382922	-0.073255	0.8391	0.0973756	0.896739	1.28783	0.773005	1.80265	1.13551e-05	4.58404e-05	-0.360936	-0.885288	0.163416	0.171432	0.631243	-0.55646	-1.24377	0.130847	0.109395	0.324761	-1.36461	-1.97119	-0.758035	5.45161e-05	0.00117219	-0.798009	-1.52619	-0.0698241
ENSMUSG00000000305	12561	Cdh4	protein_coding	MGI Symbol	6	Cadherin-4 [Source:UniProtKB/Swiss-Prot;Acc:P39038]	0.02658	-0.529421	0.582581	0.923363	0.942413	0.161466	-0.312207	0.63514	0.494098	0.765795	-0.0571985	-0.717437	0.60304	0.861626	0.89642	-0.1292	-0.568689	0.310289	0.555058	0.983698	-0.140272	-0.617532	0.336989	0.555148	0.623677	-0.110509	-0.603697	0.382678	0.652494	0.931918	-0.0461267	-0.732087	0.639834	0.892371	0.957307	0.201322	-0.374756	0.7774	0.483352	0.652445	0.245245	-0.47634	0.96683
ENSMUSG00000000317	12029	Bcl6b	protein_coding	MGI Symbol	3	B-cell CLL/lymphoma 6 member B protein [Source:UniProtKB/Swiss-Prot;Acc:O88282]	1.07327	0.486317	1.66022	0.000686507	0.00183186	-0.570402	-1.0358	-0.105008	0.0176681	0.148253	0.43899	-0.343051	1.22103	0.262715	0.347512	-0.0120774	-0.479311	0.455156	0.958515	0.998763	0.376243	-0.166489	0.918975	0.168485	0.22781	0.220771	-0.322763	0.764304	0.415814	0.831567	0.050669	-0.778691	0.880029	0.90216	0.96146	0.21044	-0.478983	0.899863	0.540077	0.696315	0.0638794	-0.796068	0.923827
ENSMUSG00000000320	11684	Alox12	protein_coding	MGI Symbol	2	arachidonate 12-lipoxygenase [Source:MGI Symbol;Acc:MGI:87998]	-0.456322	-0.954099	0.0414552	0.0712232	0.110221	0.0799194	-0.381937	0.541775	0.727887	0.89076	-0.350272	-0.966219	0.265676	0.256637	0.340966	-0.536334	-0.993227	-0.0794419	0.0226549	0.724678	-0.189406	-0.700245	0.321434	0.457277	0.531138	-0.50961	-1.01738	-0.00183764	0.0492182	0.37141	-0.6972	-1.35416	-0.0402394	0.0381333	0.181939	-0.344803	-0.913409	0.223804	0.226969	0.397819	-0.0261306	-0.669452	0.61719
ENSMUSG00000000326	12846	Comt	protein_coding	MGI Symbol	4	Catechol O-methyltransferase [Source:UniProtKB/Swiss-Prot;Acc:O88587]	0.520443	-0.280316	1.3212	0.195989	0.263572	-0.414853	-1.08536	0.255652	0.217856	0.538534	1.28526	-0.0730634	2.64359	0.0629597	0.104774	0.111947	-0.537921	0.761815	0.729061	0.990955	2.51466	1.43966	3.58967	3.13103e-05	0.000114029	-0.638332	-1.30217	0.0255072	0.0589909	0.410786	-1.11745	-2.72318	0.488277	0.166889	0.409173	-0.929758	-2.30814	0.448624	0.179976	0.340848	-1.17967	-2.6068	0.247453
ENSMUSG00000000339	66368	Rtca	protein_coding	MGI Symbol	5	RNA 3'-terminal phosphate cyclase [Source:MGI Symbol;Acc:MGI:1913618]	-0.107885	-0.302635	0.0868642	0.268926	0.344943	0.000209126	-0.170927	0.171345	0.998038	0.999287	0.0778088	-0.172329	0.327946	0.532415	0.61786	-0.0790199	-0.240558	0.0825184	0.328074	0.97665	-0.175885	-0.350264	-0.00150553	0.0481526	0.076096	-0.185325	-0.363976	-0.00667417	0.0424288	0.343531	0.174674	-0.0839425	0.43329	0.179417	0.42621	0.206253	-0.0045009	0.417007	0.0548376	0.148859	-0.185485	-0.452334	0.0813646
ENSMUSG00000000340	13171	Dbt	protein_coding	MGI Symbol	4	Mus musculus dihydrolipoamide branched chain transacylase E2 (Dbt), transcript variant 2, mRNA. [Source:RefSeq mRNA;Acc:NM_001357344]	0.616685	0.418009	0.815361	2.52672e-07	1.81296e-06	0.107341	-0.0585851	0.273267	0.198026	0.513532	0.738182	0.523459	0.952905	3.11057e-08	3.62956e-07	0.027282	-0.129561	0.184125	0.726523	0.990955	0.349571	0.177175	0.521967	0.000211047	0.000615926	0.0769422	-0.101211	0.255096	0.3872	0.814781	0.415893	0.189561	0.642226	0.000651502	0.0175178	-0.0783625	-0.281021	0.124296	0.438364	0.613148	-0.014156	-0.255084	0.226773
ENSMUSG00000000346	23994	Dazap2	protein_coding	MGI Symbol	4	DAZ-associated protein 2 [Source:UniProtKB/Swiss-Prot;Acc:Q9DCP9]	-0.368861	-0.522636	-0.215086	2.16128e-05	8.66849e-05	-0.00386553	-0.128487	0.120756	0.950229	0.983238	-0.594121	-0.758415	-0.429827	1.02901e-08	1.43002e-07	0.0495504	-0.0680049	0.167106	0.398599	0.983698	-0.268929	-0.400055	-0.137803	0.000183516	0.00054463	0.0342445	-0.0995475	0.168036	0.607145	0.918086	-0.275642	-0.449904	-0.10138	0.00277882	0.0396143	0.0966021	-0.0588239	0.252028	0.215814	0.384943	0.221395	0.0340217	0.408768
ENSMUSG00000000355	68995	Mcts1	protein_coding	MGI Symbol	5	Malignant T-cell-amplified sequence 1 [Source:UniProtKB/Swiss-Prot;Acc:Q9DB27]	0.530947	0.287044	0.774849	8.53022e-05	0.000290005	-0.0175468	-0.215799	0.180705	0.858665	0.946871	1.06585	0.736434	1.39528	1.10338e-07	1.03763e-06	0.00570749	-0.180278	0.191693	0.950758	0.998763	0.623484	0.405157	0.841811	1.21374e-06	6.46549e-06	-0.0563252	-0.265484	0.152834	0.588613	0.914042	0.448078	0.0993744	0.796781	0.0131951	0.100507	0.552602	0.26391	0.841294	0.000415477	0.00477082	-0.552454	-0.911205	-0.193703
ENSMUSG00000000374	216131	Trappc10	protein_coding	MGI Symbol	5		-0.0576006	-0.19367	0.0784686	0.396595	0.478856	-0.100777	-0.21403	0.0124765	0.0795453	0.333392	-0.162819	-0.314146	-0.011491	0.0356884	0.0641768	-0.035203	-0.141902	0.0714962	0.507993	0.983698	-0.355751	-0.473604	-0.237898	4.33199e-07	2.6413e-06	-0.0194259	-0.140373	0.101522	0.746702	0.95316	0.15773	-0.00165861	0.317118	0.0523087	0.217556	0.281959	0.142419	0.4215	0.000220237	0.00306561	0.00444141	-0.16464	0.173523
ENSMUSG00000000378	216527	Ccm2	protein_coding	MGI Symbol	8	Cerebral cavernous malformations [Source:UniProtKB/Swiss-Prot;Acc:Q8K2Y9]	-0.42862	-0.593959	-0.26328	6.41162e-06	2.98558e-05	-0.0825084	-0.224619	0.0596019	0.246973	0.573473	-0.741653	-0.92565	-0.557656	8.25119e-10	1.83176e-08	0.0182129	-0.115601	0.152027	0.784269	0.99177	-0.570476	-0.714634	-0.426317	1.2837e-09	1.82316e-08	-0.00460833	-0.155506	0.146289	0.950996	0.993425	-0.152965	-0.344615	0.0386864	0.114342	0.331502	0.2812	0.11182	0.450579	0.0017979	0.013373	0.230525	0.0280484	0.433001
ENSMUSG00000000384	21379	Tbrg4	protein_coding	MGI Symbol	12	Protein TBRG4 [Source:UniProtKB/Swiss-Prot;Acc:Q91YM4]	-0.236042	-0.379278	-0.0928069	0.00192546	0.00460175	-0.0433506	-0.162154	0.0754525	0.464389	0.748457	-0.178724	-0.336555	-0.020893	0.0275374	0.0513391	0.00207501	-0.109644	0.113794	0.970184	0.998763	-0.344506	-0.468157	-0.220854	1.88577e-06	9.54426e-06	0.0434524	-0.0833124	0.170217	0.491711	0.873683	0.167857	0.00136591	0.334347	0.048243	0.208635	-0.0972275	-0.243268	0.0488134	0.185569	0.34726	-0.100669	-0.277623	0.0762852
ENSMUSG00000000385	50528	Tmprss2	protein_coding	MGI Symbol	1	Transmembrane protease serine 2 Transmembrane protease serine 2 non-catalytic chain Transmembrane protease serine 2 catalytic chain [Source:UniProtKB/Swiss-Prot;Acc:Q9JIQ8]	-0.747629	-1.25231	-0.242951	0.00478647	0.0103225	0.409887	-0.0544808	0.874254	0.0818951	0.337907	-0.00281921	-0.631067	0.625429	0.992795	0.995178	0.237246	-0.160026	0.634517	0.233967	0.952561	0.330549	-0.110256	0.771353	0.137175	0.190677	0.173841	-0.270775	0.618456	0.433309	0.843262	-0.0961224	-0.752765	0.56052	0.768444	0.896453	-0.0912716	-0.627821	0.445277	0.73231	0.839974	-0.334923	-0.993525	0.32368
ENSMUSG00000000386	NA	Mx1	protein_coding	MGI Symbol	5	MX dynamin-like GTPase 1 [Source:MGI Symbol;Acc:MGI:97243]	0.33829	-0.281386	0.957966	0.275836	0.352275	0.0104505	-0.504533	0.525435	0.967426	0.988723	-0.0908436	-0.817997	0.636309	0.801581	0.848698	0.349911	-0.10881	0.808633	0.13073	0.9248	0.43128	-0.0782381	0.940798	0.094705	0.138164	0.00657908	-0.485458	0.498616	0.978533	0.995544	-0.172212	-0.932433	0.588008	0.648947	0.827479	-0.45838	-1.05207	0.135311	0.12625	0.266776	0.439584	-0.365116	1.24428
ENSMUSG00000000399	66108	Ndufa9	protein_coding	MGI Symbol	3	NADH dehydrogenase [ubiquinone] 1 alpha subcomplex subunit 9, mitochondrial [Source:UniProtKB/Swiss-Prot;Acc:Q9DC69]	-0.353171	-0.592157	-0.114186	0.00487941	0.0104985	-0.0666236	-0.260226	0.126979	0.490023	0.763224	-0.384222	-0.637093	-0.131352	0.0039023	0.00942168	-0.00381235	-0.185812	0.178187	0.966376	0.998763	-0.627883	-0.832753	-0.423013	3.23586e-07	2.04711e-06	0.0574987	-0.149192	0.264189	0.576411	0.910274	0.239848	-0.0299504	0.509647	0.0798199	0.274575	0.463868	0.22182	0.705917	0.000409929	0.00471428	-0.0355726	-0.324667	0.253522
ENSMUSG00000000409	16818	Lck	protein_coding	MGI Symbol	8	Proto-onco tyrosine-protein kinase LCK [Source:UniProtKB/Swiss-Prot;Acc:P06240]	0.169992	-0.407959	0.747942	0.554856	0.629228	0.400065	-0.0739513	0.874081	0.0956312	0.362785	0.424476	-0.271929	1.12088	0.224631	0.305635	-0.284689	-0.717755	0.148378	0.191033	0.941365	0.218293	-0.285222	0.721809	0.385406	0.459241	-0.0624984	-0.561981	0.436984	0.801276	0.96526	-0.0785057	-0.820773	0.663762	0.831502	0.926494	0.0739295	-0.548601	0.69646	0.811189	0.890311	0.145581	-0.625338	0.916499
ENSMUSG00000000420	14423	Galnt1	protein_coding	MGI Symbol	8	Polypeptide N-acetylgalactosaminyltransferase 1 Polypeptide N-acetylgalactosaminyltransferase 1 soluble form [Source:UniProtKB/Swiss-Prot;Acc:O08912]	0.503484	0.364132	0.642837	1.04943e-08	1.2147e-07	-0.0048999	-0.119893	0.110093	0.931669	0.975159	0.355341	0.20002	0.510662	4.30781e-05	0.000182411	-0.0220716	-0.130218	0.0860744	0.681628	0.988846	0.273671	0.153044	0.394297	4.84642e-05	0.000168335	0.0283712	-0.0943963	0.151139	0.642377	0.927435	0.0595991	-0.104656	0.223855	0.466886	0.705872	0.329819	0.18559	0.474048	4.33491e-05	0.00101255	0.143243	-0.0308843	0.31737
ENSMUSG00000000439	67027	Mkrn2	protein_coding	MGI Symbol	3	Probable E3 ubiquitin-protein ligase makorin-2 [Source:UniProtKB/Swiss-Prot;Acc:Q9ERV1]	-0.229876	-0.412364	-0.0473881	0.014957	0.0280826	0.0916848	-0.0672936	0.250663	0.250089	0.577216	-0.205033	-0.420612	0.0105464	0.0616782	0.102858	0.00651112	-0.140587	0.15361	0.929025	0.998763	-0.241188	-0.400017	-0.0823594	0.00392131	0.00833487	0.078621	-0.0884373	0.245679	0.346518	0.786468	0.0426663	-0.181081	0.266414	0.701453	0.860918	0.112361	-0.0752242	0.299946	0.232589	0.404116	0.0668418	-0.166615	0.300299
ENSMUSG00000000440	19016	Pparg	protein_coding	MGI Symbol	7	peroxisome proliferator activated receptor gamma [Source:MGI Symbol;Acc:MGI:97747]	0.0351288	-0.374453	0.44471	0.862994	0.892902	0.00439931	-0.349831	0.358629	0.980061	0.992759	-0.728485	-1.17537	-0.2816	0.00212642	0.0055287	0.0535	-0.275151	0.382151	0.743401	0.990955	-0.583691	-0.921141	-0.246241	0.00121326	0.00293967	0.809489	0.393899	1.22508	0.000340349	0.0234768	-0.0912938	-0.544689	0.362101	0.685656	0.851943	-0.168031	-0.541689	0.205627	0.368136	0.545588	0.768013	0.276094	1.25993
ENSMUSG00000000441	110157	Raf1	protein_coding	MGI Symbol	11	Mus musculus v-raf-leukemia viral onco 1 (Raf1), transcript variant 3, mRNA. [Source:RefSeq mRNA;Acc:NM_001356334]	-0.239828	-0.432436	-0.0472201	0.0160627	0.0299377	-0.252747	-0.408773	-0.0967221	0.00225082	0.0518288	-0.319842	-0.522078	-0.117606	0.00278247	0.0070058	0.00167677	-0.144188	0.147541	0.981544	0.999004	-0.196399	-0.358588	-0.0342088	0.018973	0.0334195	0.0113724	-0.154517	0.177261	0.890287	0.982602	-0.121766	-0.336076	0.0925429	0.257041	0.516928	0.0149132	-0.177472	0.207298	0.876057	0.929381	-0.172734	-0.404365	0.0588982
ENSMUSG00000000486	54204	2019-09-01	protein_coding	MGI Symbol	10	Septin-1 [Source:UniProtKB/Swiss-Prot;Acc:P42209]	-0.838515	-1.22472	-0.452309	8.83445e-05	0.000298862	0.283017	-0.0834638	0.649497	0.126168	0.413845	-0.582492	-1.03456	-0.130419	0.0129664	0.0268059	-0.0515097	-0.381447	0.278427	0.753548	0.990955	-0.037605	-0.395388	0.320178	0.832536	0.865698	-0.0964924	-0.463837	0.270852	0.597773	0.915669	-0.596397	-1.06918	-0.123617	0.0148255	0.10667	-0.448003	-0.844933	-0.0510723	0.0280166	0.0940428	0.0269938	-0.441213	0.4952
ENSMUSG00000000489	18591	Pdgfb	protein_coding	MGI Symbol	4	platelet derived growth factor, B polypeptide [Source:MGI Symbol;Acc:MGI:97528]	-0.289925	-0.875753	0.295903	0.322516	0.40282	0.130017	-0.399251	0.659285	0.621636	0.839025	-0.604661	-1.26501	0.0556914	0.0715353	0.116756	0.232415	-0.238	0.70283	0.323322	0.97665	-0.219722	-0.699553	0.260109	0.35954	0.433873	0.529372	-0.0288703	1.08761	0.0624113	0.421495	-0.152524	-0.819616	0.514569	0.645909	0.825165	-0.378414	-0.906388	0.14956	0.15488	0.307088	0.444752	-0.261743	1.15125
ENSMUSG00000000530	11482	Acvrl1	protein_coding	MGI Symbol	11	Serine/threonine-protein kinase receptor R3 [Source:UniProtKB/Swiss-Prot;Acc:Q61288]	-0.17451	-0.459555	0.110535	0.222629	0.294159	0.244766	-0.00349921	0.493032	0.053149	0.27188	-0.137994	-0.473734	0.197746	0.410333	0.501222	-0.0816306	-0.308067	0.144806	0.469746	0.983698	0.0562166	-0.195803	0.308236	0.653951	0.713026	0.24163	-0.02444	0.5077	0.0737931	0.451804	-0.275841	-0.629341	0.0776584	0.122384	0.342916	0.0062345	-0.296315	0.308784	0.966923	0.981509	0.208251	-0.15553	0.572031
ENSMUSG00000000531	56149	Grasp	protein_coding	MGI Symbol	1	ral receptor for phosphoinositides 1-associated scaffold protein [Source:UniProtKB/Swiss-Prot;Acc:Q9JJA9]	0.0891891	-0.319274	0.497652	0.66078	0.726134	0.0529708	-0.297325	0.403267	0.761038	0.904722	-0.450715	-0.90975	0.00832112	0.0540811	0.0918827	-0.0324439	-0.358715	0.293828	0.841437	0.994343	0.00849994	-0.34931	0.36631	0.961872	0.969862	-0.0975298	-0.460111	0.265052	0.589035	0.914042	-0.491658	-0.973622	-0.00969499	0.0457882	0.202213	-0.181537	-0.596729	0.233656	0.381409	0.559323	0.592874	0.0880489	1.0977
ENSMUSG00000000532	11479	Acvr1b	protein_coding	MGI Symbol	1	Activin receptor type-1B [Source:UniProtKB/Swiss-Prot;Acc:Q61271]	-0.218184	-0.4197	-0.0166684	0.0346072	0.0586129	0.242151	0.0699459	0.414355	0.00711637	0.0929781	0.182815	-0.0606781	0.426307	0.136706	0.202002	-0.0173513	-0.174888	0.140185	0.824645	0.992372	-0.137712	-0.310744	0.0353196	0.115339	0.164202	0.0696317	-0.109464	0.248727	0.435874	0.845301	0.303175	0.0493821	0.556968	0.0205245	0.129394	0.0886733	-0.116694	0.29404	0.387317	0.565496	-0.158848	-0.423882	0.106185
ENSMUSG00000000538	216810	Tom1l2	protein_coding	MGI Symbol	11	TOM1-like protein 2 [Source:UniProtKB/Swiss-Prot;Acc:Q5SRX1]	-0.67177	-0.920434	-0.423106	3.21946e-06	1.6358e-05	-0.023565	-0.226757	0.179627	0.815529	0.927351	-0.431852	-0.698942	-0.164763	0.002289	0.00591233	-0.0739782	-0.265106	0.11715	0.437908	0.983698	-0.429451	-0.641669	-0.217233	0.000216302	0.000629563	-0.0685377	-0.285498	0.148422	0.526095	0.889636	-0.0763799	-0.358945	0.206186	0.587214	0.787718	-0.152678	-0.40439	0.0990349	0.226853	0.397732	-0.263483	-0.566606	0.0396405
ENSMUSG00000000552	29813	Zfp385a	protein_coding	MGI Symbol	3	zinc finger protein 385A [Source:MGI Symbol;Acc:MGI:1352495]	-0.947985	-1.30116	-0.594808	3.59256e-06	1.8056e-05	-0.309155	-0.610664	-0.00764546	0.0447432	0.247599	-1.50898	-1.89422	-1.12373	1.63794e-09	3.21813e-08	0.0241252	-0.262729	0.31098	0.865627	0.996817	-0.700281	-1.00968	-0.390886	5.00948e-05	0.000173304	-0.245417	-0.565149	0.074315	0.128411	0.570537	-0.784571	-1.18688	-0.382262	0.000335603	0.0125968	-0.371877	-0.729429	-0.0143255	0.0419216	0.123961	0.251838	-0.175057	0.678733
ENSMUSG00000000555	16402	Itga5	protein_coding	MGI Symbol	4	Integrin alpha-5 Integrin alpha-5 heavy chain Integrin alpha-5 light chain [Source:UniProtKB/Swiss-Prot;Acc:P11688]	-0.735985	-1.01129	-0.460679	3.84688e-06	1.91783e-05	-0.140549	-0.37194	0.0908419	0.226212	0.550255	-0.512977	-0.818311	-0.207643	0.00160773	0.0043472	-0.113363	-0.33257	0.105844	0.301533	0.974011	-0.334808	-0.576423	-0.0931926	0.00791386	0.0155488	-0.169054	-0.416442	0.0783336	0.174481	0.634196	-0.291532	-0.613331	0.030267	0.074465	0.263256	0.0148628	-0.268897	0.298623	0.91606	0.952817	-0.363557	-0.703381	-0.0237336
ENSMUSG00000000561	70465	Wdr77	protein_coding	MGI Symbol	5	WD repeat domain 77 [Source:MGI Symbol;Acc:MGI:1917715]	0.263049	0.106846	0.419252	0.00157219	0.00384303	-0.12158	-0.251835	0.00867555	0.0664434	0.30608	0.0047132	-0.177278	0.186704	0.958436	0.970013	-0.0475985	-0.17093	0.0757335	0.439228	0.983698	-0.17684	-0.312915	-0.0407643	0.0122681	0.0228033	-0.0259053	-0.16539	0.113579	0.708857	0.945719	0.133954	-0.0569028	0.324812	0.163389	0.404563	-0.0654778	-0.224995	0.094039	0.41094	0.58718	0.136756	-0.0646237	0.338135
ENSMUSG00000000563	11950	Atp5f1	protein_coding	MGI Symbol	6	ATP synthase F(0) complex subunit B1, mitochondrial [Source:UniProtKB/Swiss-Prot;Acc:Q9CQQ7]	0.213472	-0.00455792	0.431501	0.0547314	0.0874934	-0.0779419	-0.257718	0.101834	0.385393	0.693002	0.289884	0.0609933	0.518774	0.0144638	0.0295069	0.0536332	-0.115588	0.222854	0.52474	0.983698	0.0608633	-0.126006	0.247733	0.513413	0.58544	-0.0399164	-0.233063	0.15323	0.677848	0.938827	0.282654	0.040424	0.524883	0.0234184	0.138369	-0.0404234	-0.261195	0.180348	0.712774	0.827612	-0.154354	-0.41437	0.105662
ENSMUSG00000000567	20682	Sox9	protein_coding	MGI Symbol	1	Transcription factor SOX-9 [Source:UniProtKB/Swiss-Prot;Acc:Q04887]	-0.658703	-1.21426	-0.103144	0.0214189	0.038405	0.620541	0.135629	1.10545	0.0135464	0.127762	-0.743635	-1.31868	-0.168594	0.0126663	0.0263026	0.00729978	-0.414659	0.429258	0.972228	0.998763	-0.405588	-0.858134	0.0469583	0.0774928	0.116078	0.108681	-0.372403	0.589765	0.649843	0.931499	-0.330748	-0.928595	0.2671	0.269555	0.53001	0.0806725	-0.445457	0.606802	0.757804	0.856206	0.705473	0.0697229	1.34122
ENSMUSG00000000568	11991	Hnrnpd	protein_coding	MGI Symbol	11	Heteroous nuclear ribonucleoprotein D0 [Source:UniProtKB/Swiss-Prot;Acc:Q60668]	0.253599	0.0536862	0.453511	0.0143162	0.0270632	0.216731	0.0516534	0.38181	0.011474	0.116126	0.232127	0.0106088	0.453645	0.0404852	0.0713504	-0.0340024	-0.188864	0.120859	0.659017	0.988678	0.436415	0.262661	0.610168	1.06518e-05	4.33516e-05	-0.0791934	-0.254903	0.0965161	0.367068	0.800064	-0.23829	-0.473404	-0.00317645	0.0471356	0.205723	-0.358038	-0.563171	-0.152904	0.00110935	0.00955381	0.238203	-0.0103613	0.486768
ENSMUSG00000000581	57316	C1d	protein_coding	MGI Symbol	5	Mus musculus C1D nuclear receptor co-repressor (C1d), transcript variant 2, mRNA. [Source:RefSeq mRNA;Acc:NM_001330649]	0.954166	0.682296	1.22604	1.99012e-08	2.05405e-07	0.00782338	-0.205201	0.220847	0.941087	0.979164	1.20559	0.852083	1.5591	3.69153e-08	4.22768e-07	0.0105053	-0.189163	0.210174	0.915684	0.998135	0.691421	0.457425	0.925417	6.48313e-07	3.74206e-06	0.0567059	-0.169707	0.283119	0.614864	0.920984	0.524675	0.150705	0.898645	0.0072356	0.0700272	0.512131	0.207045	0.817217	0.00162054	0.01238	-0.243601	-0.635393	0.148191
ENSMUSG00000000594	14667	Gm2a	protein_coding	MGI Symbol	1	Ganglioside GM2 activator [Source:UniProtKB/Swiss-Prot;Acc:Q60648]	-0.596179	-0.872848	-0.319509	9.76188e-05	0.000327337	-0.318683	-0.539597	-0.097769	0.00588121	0.0831489	-0.552122	-0.839791	-0.264453	0.000403043	0.00128607	0.141256	-0.065531	0.348043	0.174639	0.93701	-0.0530774	-0.282736	0.176581	0.642352	0.702772	-0.962036	-1.20623	-0.717845	1.42754e-09	9.26972e-06	-0.357788	-0.662314	-0.0532632	0.0225442	0.136582	-0.628889	-0.906451	-0.351327	4.93651e-05	0.00110245	-0.36274	-0.69515	-0.0303291
ENSMUSG00000000600	79264	Krit1	protein_coding	MGI Symbol	12	Krev interaction trapped protein 1 [Source:UniProtKB/Swiss-Prot;Acc:Q6S5J6]	0.720858	0.517668	0.924049	1.57176e-08	1.69962e-07	-0.161015	-0.325107	0.00307802	0.0542281	0.274565	0.706878	0.449304	0.964453	2.45555e-06	1.4986e-05	-0.0229894	-0.178562	0.132583	0.766315	0.990955	0.633916	0.450887	0.816946	2.6518e-08	2.34918e-07	-0.0711039	-0.24621	0.104002	0.415944	0.831567	0.0499726	-0.225058	0.325003	0.714874	0.868895	0.0547415	-0.17247	0.281952	0.628336	0.76925	-0.147035	-0.43112	0.137051
ENSMUSG00000000605	12727	Clcn4	protein_coding	MGI Symbol	10	Mus musculus chloride channel, voltage-sensitive 4 (Clcn4), transcript variant 7, mRNA. [Source:RefSeq mRNA;Acc:NM_001357103]	0.270392	0.108785	0.432	0.00167152	0.00405682	-0.0212001	-0.154833	0.112433	0.7497	0.899751	0.42086	0.246728	0.594992	1.9291e-05	8.97964e-05	-0.0243377	-0.150048	0.101373	0.697126	0.990173	0.152089	0.0131889	0.290989	0.0327292	0.0539614	0.0313454	-0.111436	0.174127	0.659065	0.932685	0.244433	0.0605523	0.428314	0.0105622	0.088567	0.425997	0.26287	0.589124	5.685e-06	0.000283369	-0.171668	-0.368088	0.0247528
ENSMUSG00000000628	15277	Hk2	protein_coding	MGI Symbol	4	Hexokinase-2 [Source:UniProtKB/Swiss-Prot;Acc:O08528]	-0.491712	-1.23924	0.255812	0.190763	0.257611	0.123934	-0.567767	0.815635	0.718661	0.886685	-0.134295	-1.0936	0.82501	0.778275	0.830045	0.0838523	-0.543553	0.711257	0.788065	0.992038	-1.98901	-2.5364	-1.44162	9.24276e-09	9.57223e-08	-0.0159986	-0.711501	0.679504	0.963079	0.993948	1.93857	1.02958	2.84756	0.000111773	0.00675161	-0.272897	-0.758971	0.213177	0.262638	0.43774	-0.233484	-1.23379	0.76682
ENSMUSG00000000631	360013	Myo18a	protein_coding	MGI Symbol	24	myosin XVIIIA [Source:MGI Symbol;Acc:MGI:2667185]	-0.181184	-0.357365	-0.00500287	0.0441469	0.0724183	-0.00546148	-0.149168	0.138245	0.93904	0.978207	-0.250279	-0.437011	-0.0635466	0.00998836	0.0213987	0.105119	-0.0307023	0.24094	0.125365	0.9248	-0.0367084	-0.187232	0.113815	0.624158	0.686886	0.0421323	-0.112688	0.196953	0.584699	0.912776	-0.108452	-0.306135	0.089232	0.273508	0.534732	-0.190583	-0.369747	-0.0114182	0.0377104	0.115153	0.0636333	-0.149104	0.27637
ENSMUSG00000000673	107766	Haao	protein_coding	MGI Symbol	1	3-hydroxyanthranilate 3,4-dioxygenase [Source:MGI Symbol;Acc:MGI:1349444]	-1.01801	-1.29128	-0.744741	5.26132e-09	6.75185e-08	0.0192406	-0.196618	0.235099	0.857674	0.946436	-0.951026	-1.24066	-0.661389	8.16452e-08	8.11888e-07	0.195985	-0.00881482	0.400784	0.0601602	0.832028	-0.484828	-0.716148	-0.253508	0.000139763	0.000428034	0.00531361	-0.229073	0.2397	0.963612	0.993948	-0.270213	-0.579172	0.0387464	0.08462	0.283164	-0.3534	-0.633749	-0.0730524	0.0148909	0.0597203	-0.0477445	-0.382366	0.286877
ENSMUSG00000000682	23833	Cd52	protein_coding	MGI Symbol	3	CAMPATH-1 antigen [Source:UniProtKB/Swiss-Prot;Acc:Q64389]	0.408358	-0.000757742	0.817474	0.0504043	0.0813573	-0.169816	-0.513796	0.174165	0.323694	0.645475	-0.031557	-0.533352	0.470238	0.899302	0.925235	0.172384	-0.149736	0.494505	0.28526	0.972171	0.506268	0.137023	0.875513	0.00853341	0.0166027	0.155494	-0.207524	0.518513	0.391075	0.818384	-0.365441	-0.898712	0.167831	0.173301	0.41826	-0.146201	-0.598469	0.306069	0.516555	0.678586	0.270099	-0.2784	0.818598
ENSMUSG00000000686	67477	Abhd15	protein_coding	MGI Symbol	3	abhydrolase domain containing 15 [Source:MGI Symbol;Acc:MGI:1914727]	0.408825	0.0563584	0.761292	0.0242044	0.0428376	0.273594	-0.01056	0.557749	0.0586751	0.285719	0.621848	0.19777	1.04593	0.00518572	0.0120932	-0.161308	-0.424849	0.102233	0.222733	0.950593	-0.419833	-0.708264	-0.131401	0.00549073	0.0112155	0.142891	-0.161141	0.446923	0.347161	0.78688	0.880373	0.440394	1.32035	0.000247856	0.010485	0.387581	0.0434473	0.731714	0.028333	0.0946752	0.0605713	-0.412009	0.533151
ENSMUSG00000000693	16950	Loxl3	protein_coding	MGI Symbol	5	Lysyl oxidase homolog 3 [Source:UniProtKB/Swiss-Prot;Acc:Q9Z175]	-0.101102	-0.530813	0.328609	0.636388	0.703265	0.0444026	-0.337311	0.426116	0.814982	0.926972	-0.431897	-0.932371	0.0685774	0.0886672	0.140173	0.0708653	-0.279337	0.421067	0.684183	0.988924	-0.197946	-0.563543	0.167652	0.279736	0.35094	-0.0262263	-0.414484	0.362032	0.891886	0.982923	-0.163086	-0.674452	0.34828	0.522166	0.745042	-0.00769411	-0.433971	0.418583	0.971025	0.984058	0.375198	-0.162781	0.913176
ENSMUSG00000000708	18519	Kat2b	protein_coding	MGI Symbol	7	Histone acetyltransferase KAT2B [Source:UniProtKB/Swiss-Prot;Acc:Q9JHD1]	1.05778	0.8764	1.23916	3.87197e-14	7.01844e-12	-0.0620799	-0.213871	0.0897111	0.412629	0.71556	0.984663	0.786167	1.18316	3.88206e-12	2.86456e-10	-0.0359247	-0.17853	0.106681	0.612806	0.985861	0.695699	0.539109	0.85229	7.26817e-11	1.66095e-09	0.0633927	-0.098433	0.225218	0.432442	0.842838	0.253039	0.0442689	0.461809	0.01887	0.121946	0.314236	0.130624	0.497847	0.00134638	0.0108538	0.011035	-0.210907	0.232977
ENSMUSG00000000711	19344	Rab5b	protein_coding	MGI Symbol	2	RAB5B, member RAS oncogene family [Source:MGI Symbol;Acc:MGI:105938]	-0.034312	-0.198447	0.129823	0.674353	0.737337	0.0407067	-0.0947166	0.17613	0.546239	0.796295	0.0341873	-0.144496	0.21287	0.700502	0.765132	-0.00461594	-0.132044	0.122812	0.94189	0.998763	-0.0572102	-0.198641	0.084221	0.417713	0.492228	-0.136729	-0.281641	0.00818249	0.063674	0.425159	0.0867815	-0.102143	0.275706	0.358058	0.616821	-0.2547	-0.422412	-0.0869889	0.00391836	0.023247	-0.0277925	-0.229109	0.173524
ENSMUSG00000000732	50723	Icosl	protein_coding	MGI Symbol	4	icos ligand [Source:MGI Symbol;Acc:MGI:1354701]	-0.302851	-0.893216	0.287514	0.305382	0.384339	0.0997141	-0.431876	0.631305	0.706089	0.881736	-0.49116	-1.17612	0.193798	0.15469	0.224315	-0.0668567	-0.560773	0.42706	0.785421	0.991983	-0.0761815	-0.608448	0.456085	0.773449	0.816307	-0.0225885	-0.58165	0.536473	0.935199	0.991099	-0.481835	-1.19494	0.231271	0.179249	0.4262	0.0165765	-0.616053	0.649206	0.957948	0.976381	0.288023	-0.443489	1.01954
ENSMUSG00000000738	234847	Spg7	protein_coding	MGI Symbol	13	Paraplegin [Source:UniProtKB/Swiss-Prot;Acc:Q3ULF4]	-0.213437	-0.395708	-0.0311658	0.0229675	0.0408378	-0.0102715	-0.160916	0.140373	0.890876	0.960049	-0.175701	-0.374963	0.0235615	0.0822016	0.131445	-0.0168462	-0.158496	0.124803	0.81092	0.992101	-0.627199	-0.784574	-0.469823	1.084e-09	1.57471e-08	0.117557	-0.0433605	0.278474	0.147294	0.593701	0.434652	0.22392	0.645383	0.000171037	0.00847965	0.371394	0.18539	0.557398	0.000254236	0.00337603	-0.0480078	-0.272138	0.176123
ENSMUSG00000000739	57429	Sult5a1	protein_coding	MGI Symbol	6	sulfotransferase family 5A, member 1 [Source:MGI Symbol;Acc:MGI:1931463]	0.342911	-0.210085	0.895907	0.216854	0.287639	0.777564	0.346195	1.20893	0.000798335	0.0283278	1.09897	0.425091	1.77285	0.00211847	0.00551133	-0.561174	-0.951155	-0.171193	0.00599348	0.622698	0.671437	0.177834	1.16504	0.00902046	0.0174536	0.773619	0.263425	1.28381	0.00396855	0.0962767	-0.133643	-0.872338	0.605052	0.716044	0.869009	0.371722	-0.281876	1.02532	0.256587	0.430584	0.0215064	-0.736014	0.779027
ENSMUSG00000000740	270106	Rpl13	protein_coding	MGI Symbol	5	60S ribosomal protein L13 [Source:UniProtKB/Swiss-Prot;Acc:P47963]	0.0858969	-0.235486	0.40728	0.591403	0.663088	-0.140409	-0.419561	0.138743	0.314779	0.63661	0.650374	0.182253	1.1185	0.00776693	0.0172161	0.0853362	-0.177815	0.348487	0.515232	0.983698	0.588403	0.278409	0.898396	0.000456741	0.00123243	-0.177568	-0.4636	0.108464	0.216345	0.686399	0.147308	-0.348661	0.643276	0.551004	0.76362	0.573566	0.142629	1.0045	0.0104731	0.0465007	-0.704886	-1.19935	-0.210419
ENSMUSG00000000743	234852	Chmp1a	protein_coding	MGI Symbol	4	Charged multivesicular body protein 1a [Source:UniProtKB/Swiss-Prot;Acc:Q921W0]	0.0531575	-0.133698	0.240013	0.567846	0.640937	0.0178798	-0.136856	0.172616	0.81619	0.927658	0.12594	-0.0815516	0.333431	0.226546	0.307596	-0.0588919	-0.2044	0.086616	0.417457	0.983698	-0.12051	-0.282057	0.0410373	0.139172	0.192999	0.0216591	-0.143546	0.186864	0.792003	0.962274	0.187558	-0.0314803	0.406596	0.0910732	0.294788	0.498057	0.305232	0.690882	6.8033e-06	0.000309937	-0.0549025	-0.287334	0.177529
ENSMUSG00000000751	68275	Rpa1	protein_coding	MGI Symbol	5	Replication protein A 70 kDa DNA-binding subunit [Source:UniProtKB/Swiss-Prot;Acc:Q8VEE4]	0.233363	0.0228586	0.443868	0.030744	0.052744	0.145162	-0.0287284	0.319052	0.0991665	0.368559	0.452912	0.21023	0.695594	0.00055073	0.00168647	0.0356522	-0.126995	0.198299	0.65955	0.988678	0.205778	0.0239956	0.38756	0.0275854	0.0465201	0.132251	-0.052548	0.31705	0.155486	0.607308	0.282786	0.0268852	0.538687	0.0312471	0.162648	0.0839914	-0.132607	0.30059	0.43707	0.612265	-0.0743868	-0.344515	0.195741
ENSMUSG00000000753	20317	Serpinf1	protein_coding	MGI Symbol	8	Pigment epithelium-derived factor [Source:UniProtKB/Swiss-Prot;Acc:P97298]	-0.294306	-0.467814	-0.120798	0.00146755	0.00361242	-0.152569	-0.292854	-0.0122834	0.0338525	0.212593	-0.618899	-0.80312	-0.434677	5.07114e-08	5.46546e-07	-0.0099956	-0.141422	0.121431	0.878376	0.99766	-0.349591	-0.49643	-0.202751	2.41733e-05	9.03939e-05	0.0292526	-0.120156	0.178662	0.693884	0.943217	-0.279304	-0.47482	-0.0837873	0.00633126	0.0642375	-0.155179	-0.33124	0.0208822	0.0823231	0.197548	0.172024	-0.0386002	0.382648
ENSMUSG00000000759	259279	Tubgcp3	protein_coding	MGI Symbol	9	tubulin, gamma complex associated protein 3 [Source:MGI Symbol;Acc:MGI:2183752]	-0.103345	-0.235807	0.0291171	0.122444	0.176042	0.0297536	-0.0822903	0.141798	0.593781	0.825282	-0.0591907	-0.213238	0.0948565	0.441231	0.53117	0.0511756	-0.0533371	0.155688	0.327598	0.97665	0.0211198	-0.0949615	0.137201	0.714512	0.765625	-0.101365	-0.218397	0.0156663	0.08755	0.484465	-0.0291349	-0.191254	0.132984	0.71785	0.870308	0.103455	-0.0353723	0.242281	0.139567	0.284904	-0.0144007	-0.183879	0.155078
ENSMUSG00000000776	67065	Polr3d	protein_coding	MGI Symbol	6	DNA-directed RNA polymerase III subunit RPC4 [Source:UniProtKB/Swiss-Prot;Acc:Q91WD1]	-0.404506	-0.653759	-0.155254	0.00221403	0.00520522	-0.0668582	-0.291467	0.15775	0.55013	0.799076	-0.570342	-0.863967	-0.276716	0.000351431	0.00113674	0.120055	-0.0890989	0.329209	0.252282	0.96496	-0.11017	-0.335023	0.114684	0.327303	0.400744	0.0569712	-0.177262	0.291204	0.625076	0.923913	-0.340117	-0.645125	-0.0351096	0.0298332	0.158878	-0.333106	-0.588899	-0.077313	0.0121047	0.0518655	0.0989773	-0.213902	0.411857
ENSMUSG00000000782	21414	Tcf7	protein_coding	MGI Symbol	2	transcription factor 7, T cell specific [Source:MGI Symbol;Acc:MGI:98507]	-0.252642	-0.526962	0.0216789	0.0699771	0.108474	0.25005	0.00941832	0.490682	0.0420945	0.239855	-0.334267	-0.648746	-0.0197878	0.0378477	0.0674434	-0.106768	-0.326675	0.113139	0.331658	0.978474	0.176	-0.0733351	0.425334	0.161053	0.218947	0.29005	0.0286781	0.551423	0.0305841	0.293713	-0.617034	-0.952751	-0.281317	0.000649872	0.0175178	-0.229843	-0.522225	0.0625383	0.119722	0.258149	0.331676	-0.00927138	0.672623
ENSMUSG00000000787	13205	Ddx3x	protein_coding	MGI Symbol	5	ATP-dependent RNA helicase DDX3X [Source:UniProtKB/Swiss-Prot;Acc:Q62167]	0.873895	0.649893	1.0979	1.8008e-09	2.80419e-08	-0.182366	-0.370905	0.00617251	0.0575783	0.282604	0.699614	0.465045	0.934184	5.44101e-07	4.05175e-06	0.0957262	-0.0813629	0.272815	0.280503	0.971353	0.739682	0.548168	0.931197	2.28101e-09	2.94468e-08	0.0867862	-0.114691	0.288263	0.388439	0.815604	0.0556582	-0.189983	0.3013	0.64887	0.827479	-0.246546	-0.470472	-0.022621	0.0318322	0.102846	-0.00808522	-0.272004	0.255834
ENSMUSG00000000791	16161	Il12rb1	protein_coding	MGI Symbol	6	Interleukin-12 receptor subunit beta-1 [Source:UniProtKB/Swiss-Prot;Acc:Q60837]	0.0364296	-0.498658	0.571517	0.891039	0.916157	0.0503262	-0.409994	0.510646	0.825917	0.931902	-0.0551528	-0.714559	0.604253	0.866359	0.90004	-0.271188	-0.714841	0.172465	0.223339	0.950593	-0.151029	-0.638187	0.336129	0.533783	0.603854	0.182772	-0.348652	0.714195	0.49027	0.873407	-0.175312	-0.86474	0.514116	0.60948	0.801384	1.06977	0.382389	1.75715	0.00319471	0.0202218	0.141908	-0.571703	0.85552
ENSMUSG00000000804	237898	Usp32	protein_coding	MGI Symbol	9	ubiquitin specific peptidase 32 [Source:MGI Symbol;Acc:MGI:2144475]	0.644216	0.451521	0.83691	5.61685e-08	4.97246e-07	-0.0510765	-0.209953	0.1078	0.518847	0.780253	0.750819	0.530365	0.971274	3.79895e-08	4.32921e-07	-0.02429	-0.173704	0.125124	0.743733	0.990955	0.592441	0.42453	0.760352	1.77254e-08	1.67906e-07	0.115629	-0.0540528	0.285312	0.175659	0.634536	0.134088	-0.0992991	0.367476	0.251854	0.511386	-0.0149595	-0.214759	0.18484	0.880251	0.931741	-0.15768	-0.403627	0.0882663
ENSMUSG00000000811	232223	Txnrd3	protein_coding	MGI Symbol	2	thioredoxin reductase 3 [Source:MGI Symbol;Acc:MGI:2386711]	-0.214722	-0.503741	0.0742978	0.140744	0.198161	0.436577	0.190035	0.683118	0.000958851	0.0316056	0.198255	-0.147272	0.543782	0.252466	0.336596	0.0492087	-0.167576	0.265993	0.648279	0.988678	0.22046	-0.0234295	0.46435	0.0750836	0.112847	0.164754	-0.0831501	0.412658	0.186323	0.648876	0.0270034	-0.336143	0.39015	0.881066	0.952343	-0.0440325	-0.338526	0.250461	0.763637	0.858794	0.0236	-0.353412	0.400612
ENSMUSG00000000823	269401	Zfp512b	protein_coding	MGI Symbol	10	zinc finger protein 512B [Source:MGI Symbol;Acc:MGI:2685478]	-0.337819	-0.501088	-0.174549	0.000164441	0.000518727	-0.0224815	-0.158418	0.113455	0.739463	0.895256	-0.433974	-0.61305	-0.254898	1.85218e-05	8.65886e-05	-0.0486553	-0.176551	0.0792406	0.445735	0.983698	-0.358479	-0.499777	-0.217182	9.08184e-06	3.76463e-05	0.127746	-0.0178658	0.273358	0.0836969	0.473213	-0.12415	-0.31303	0.06473	0.191088	0.441902	-0.0322818	-0.198752	0.134189	0.696655	0.816815	0.073674	-0.126941	0.274289
ENSMUSG00000000826	13002	Dnajc5	protein_coding	MGI Symbol	6	DnaJ homolog subfamily C member 5 [Source:UniProtKB/Swiss-Prot;Acc:P60904]	0.0748631	-0.0862785	0.236005	0.35267	0.434753	-0.162443	-0.294681	-0.0302053	0.0174307	0.147378	-0.0181213	-0.189422	0.153179	0.831468	0.872658	-2.79287e-05	-0.124056	0.124	0.999638	0.999934	-0.176267	-0.314118	-0.0384152	0.0136158	0.0249792	0.0765103	-0.0642907	0.217311	0.278024	0.744966	0.158117	-0.0234422	0.339677	0.0858942	0.285945	0.414767	0.252788	0.576747	7.83061e-06	0.000337861	-0.0694589	-0.263942	0.125024
ENSMUSG00000000827	66314	Tpd52l2	protein_coding	MGI Symbol	12	tumor protein D52-like 2 [Source:MGI Symbol;Acc:MGI:1913564]	-0.0576676	-0.212633	0.097298	0.455643	0.536875	-0.194251	-0.325041	-0.0634613	0.00468988	0.0739454	-0.0948494	-0.274807	0.0851081	0.292493	0.379863	0.12586	0.00267592	0.249044	0.0454655	0.811479	-0.0581707	-0.194052	0.0777108	0.391336	0.465325	-0.0431966	-0.181511	0.0951174	0.530785	0.891721	0.0891812	-0.0996949	0.278057	0.344954	0.604169	0.189588	0.0273249	0.351852	0.023251	0.0821412	-0.157069	-0.355294	0.0411554
ENSMUSG00000000838	14265	Fmr1	protein_coding	MGI Symbol	13	fragile X mental retardation 1 [Source:HGNC Symbol;Acc:HGNC:3775]	1.19896	1.02665	1.37126	1.7744e-16	2.09492e-13	0.0293782	-0.104242	0.162999	0.658587	0.857243	1.01342	0.8055	1.22135	6.27486e-12	4.26658e-10	-0.0222663	-0.147662	0.103129	0.721071	0.990955	1.04762	0.897189	1.19806	1.72966e-16	7.79803e-14	-0.0639443	-0.205721	0.0778323	0.366737	0.799934	-0.0564658	-0.280384	0.167452	0.612447	0.803646	-0.340835	-0.522433	-0.159237	0.000517557	0.00553211	0.214913	-0.0197523	0.449577
ENSMUSG00000000876	59038	Pxmp4	protein_coding	MGI Symbol	2	Peroxisomal membrane protein 4 [Source:UniProtKB/Swiss-Prot;Acc:Q9JJW0]	-0.369475	-0.577349	-0.161602	0.0009231	0.00239001	0.146872	-0.0221451	0.315888	0.0865562	0.34558	-0.774536	-1.0002	-0.548871	3.22106e-08	3.74838e-07	-0.0926159	-0.252167	0.066935	0.247065	0.960627	-0.324918	-0.502569	-0.147267	0.000684818	0.00176428	0.06976	-0.110966	0.250486	0.439156	0.846688	-0.542235	-0.78104	-0.303429	4.79078e-05	0.00418609	0.28355	0.0739891	0.49311	0.00935939	0.0431795	0.551933	0.295867	0.807998
ENSMUSG00000000881	53310	Dlg3	protein_coding	MGI Symbol	8	Disks large homolog 3 [Source:UniProtKB/Swiss-Prot;Acc:P70175]	-0.309825	-0.546532	-0.0731176	0.0117076	0.0227206	0.0763807	-0.126089	0.27885	0.449521	0.740947	-0.214378	-0.487282	0.0585264	0.11998	0.180805	0.103889	-0.0835554	0.291332	0.268698	0.965053	-0.0350652	-0.241678	0.171547	0.732905	0.781978	-0.189789	-0.397745	0.0181669	0.072436	0.447965	-0.0754238	-0.361833	0.210985	0.596845	0.792965	-0.275913	-0.516795	-0.0350302	0.0259088	0.0889198	-0.0190662	-0.318253	0.280121
ENSMUSG00000000884	13972	Gnb1l	protein_coding	MGI Symbol	11	guanine nucleotide binding protein (G protein), beta polypeptide 1-like [Source:MGI Symbol;Acc:MGI:1338057]	-0.646518	-1.05025	-0.242791	0.00249421	0.00578434	0.13668	-0.241151	0.514512	0.468221	0.75114	-0.602533	-1.07738	-0.127688	0.0142911	0.0292143	0.120274	-0.219957	0.460505	0.478346	0.983698	-0.546791	-0.884109	-0.209472	0.0022374	0.00506575	0.238743	-0.151811	0.629297	0.223316	0.694827	0.0645318	-0.408231	0.537295	0.783662	0.902813	0.383718	-0.0203529	0.787789	0.0620571	0.162422	0.0926949	-0.403004	0.588394
ENSMUSG00000000902	20587	Smarcb1	protein_coding	MGI Symbol	6	SWI/SNF related, matrix associated, actin dependent regulator of chromatin, subfamily b, member 1 [Source:MGI Symbol;Acc:MGI:1328366]	-0.6485	-0.827409	-0.469591	9.76189e-09	1.14111e-07	0.0483546	-0.106365	0.203074	0.530494	0.788049	-0.529092	-0.731007	-0.327178	5.37373e-06	2.94715e-05	0.0107132	-0.133643	0.155069	0.881297	0.99766	-0.528077	-0.683753	-0.372401	4.13602e-08	3.47667e-07	0.00740728	-0.155573	0.170388	0.92713	0.990002	0.009698	-0.200459	0.219855	0.926015	0.969857	0.265559	0.0824942	0.448624	0.00563622	0.0297422	-0.0710534	-0.292051	0.149944
ENSMUSG00000000915	29816	Hip1r	protein_coding	MGI Symbol	7	Huntingtin-interacting protein 1-related protein [Source:UniProtKB/Swiss-Prot;Acc:Q9JKY5]	-0.773827	-1.09729	-0.450362	2.24943e-05	8.96942e-05	-0.100553	-0.364929	0.163822	0.445837	0.738909	-0.0524882	-0.404338	0.299362	0.764161	0.81842	0.208353	-0.0402621	0.456968	0.0978998	0.898449	-0.135238	-0.410887	0.140412	0.326667	0.400191	0.187084	-0.0949677	0.469136	0.18716	0.649335	0.291102	-0.080343	0.662547	0.120822	0.340225	-0.340048	-0.667195	-0.0129002	0.0420398	0.124211	-0.821893	-1.22006	-0.42373
ENSMUSG00000000916	100609	Nsun5	protein_coding	MGI Symbol	9	Probable 28S rRNA (cytosine-C(5))-methyltransferase [Source:UniProtKB/Swiss-Prot;Acc:Q8K4F6]	0.000945956	-0.214431	0.216323	0.992948	0.994786	-0.0257266	-0.211766	0.160313	0.780906	0.91292	-0.0915099	-0.353884	0.170864	0.484215	0.572254	-0.0480342	-0.223484	0.127416	0.582446	0.983698	-0.0933238	-0.285113	0.0984655	0.330595	0.404194	-0.112478	-0.308145	0.0831885	0.251598	0.724179	-0.0462203	-0.31979	0.227349	0.734058	0.879609	0.377736	0.138735	0.616738	0.00279854	0.0183652	0.0667293	-0.217201	0.35066
ENSMUSG00000000934	72960	Top1mt	protein_coding	MGI Symbol	3	Mus musculus DNA topoisomerase 1, mitochondrial (Top1mt), transcript variant 2, mRNA. [Source:RefSeq mRNA;Acc:NM_001355589]	-0.483355	-0.689488	-0.277222	3.02277e-05	0.000116454	-0.0196251	-0.197038	0.157787	0.823898	0.93166	-0.455075	-0.689444	-0.220706	0.000352919	0.00114127	-0.0383443	-0.205256	0.128567	0.644343	0.988678	-0.466688	-0.64758	-0.285795	6.93443e-06	2.95949e-05	-0.266908	-0.452551	-0.0812658	0.00603214	0.118876	-0.0267313	-0.271254	0.217792	0.82593	0.924288	-0.213466	-0.421971	-0.00496045	0.0450533	0.129995	-0.0479051	-0.304702	0.208892
ENSMUSG00000000948	NA	Gm38393	protein_coding	MGI Symbol	4	SNRPN upstream reading frame protein [Source:UniProtKB/Swiss-Prot;Acc:Q9WU12]	-0.496504	-0.768203	-0.224806	0.000691061	0.00184325	-0.10158	-0.349486	0.146326	0.41176	0.714755	-0.0692123	-0.422606	0.284182	0.693793	0.759642	0.0518303	-0.181489	0.28515	0.655284	0.988678	-0.484772	-0.727883	-0.241662	0.000258316	0.000739095	-0.459407	-0.707258	-0.211555	0.000593309	0.0317667	0.46739	0.107457	0.827323	0.0123312	0.097353	-0.460769	-0.726548	-0.194989	0.00118632	0.0100174	-0.528872	-0.899344	-0.158399
ENSMUSG00000000957	17387	Mmp14	protein_coding	MGI Symbol	7	Matrix metalloproteinase-14 [Source:UniProtKB/Swiss-Prot;Acc:P53690]	-0.764946	-1.05524	-0.474648	4.89902e-06	2.36783e-05	-0.140553	-0.379479	0.0983726	0.240892	0.567881	-0.950423	-1.26341	-0.637434	3.86636e-07	3.03215e-06	-0.0552499	-0.280426	0.169926	0.622047	0.986262	-0.651082	-0.899944	-0.40222	5.5157e-06	2.4192e-05	-0.109684	-0.364717	0.145348	0.38917	0.816195	-0.354591	-0.68503	-0.0241515	0.0361511	0.176602	-0.206751	-0.501024	0.0875229	0.162967	0.318215	0.0449239	-0.308841	0.398689
ENSMUSG00000000958	20540	Slc7a7	protein_coding	MGI Symbol	12	Y+L amino acid transporter 1 [Source:UniProtKB/Swiss-Prot;Acc:Q9Z1K8]	-1.3947	-1.77133	-1.01808	6.02614e-09	7.56881e-08	0.159081	-0.216276	0.534438	0.396048	0.701109	-0.393911	-0.884351	0.0965294	0.11215	0.170829	0.0132419	-0.32877	0.355253	0.937898	0.998763	0.144668	-0.236976	0.526313	0.447354	0.521712	-0.498879	-0.85724	-0.140519	0.00765562	0.137615	-0.525337	-1.04419	-0.00648049	0.0473468	0.206202	-0.536848	-0.965353	-0.108343	0.015469	0.0613609	-0.841711	-1.33312	-0.350299
ENSMUSG00000000959	69089	Oxa1l	protein_coding	MGI Symbol	5	Mitochondrial inner membrane protein OXA1L [Source:UniProtKB/Swiss-Prot;Acc:Q8BGA9]	-0.366313	-0.50431	-0.228316	4.33295e-06	2.1299e-05	-0.00663748	-0.120069	0.106794	0.906269	0.966942	-0.503298	-0.652345	-0.354251	4.55314e-08	5.0282e-07	-0.032769	-0.139448	0.0739099	0.537527	0.983698	-0.412819	-0.531356	-0.294282	2.35401e-08	2.12745e-07	-0.0411748	-0.162292	0.079942	0.495259	0.876165	-0.123248	-0.281	0.0345037	0.121938	0.342328	-0.0721532	-0.212733	0.0684271	0.305138	0.482797	0.130348	-0.0381505	0.298846
ENSMUSG00000000976	217026	Heatr6	protein_coding	MGI Symbol	5	HEAT repeat-containing protein 6 [Source:UniProtKB/Swiss-Prot;Acc:Q6P1G0]	-0.039377	-0.1837	0.104946	0.583732	0.656187	-0.102627	-0.224126	0.0188712	0.0953705	0.362328	-0.0298914	-0.19753	0.137747	0.719958	0.781911	-0.0983055	-0.213387	0.0167758	0.0918216	0.892066	-0.229033	-0.356102	-0.101964	0.000798877	0.00202045	0.041735	-0.089316	0.172786	0.522761	0.88909	0.100836	-0.0752473	0.27692	0.253372	0.513426	0.268561	0.116974	0.420148	0.000954122	0.00856928	-0.112113	-0.296963	0.072738
ENSMUSG00000001016	67781	Ilf2	protein_coding	MGI Symbol	6	Interleukin enhancer-binding factor 2 [Source:UniProtKB/Swiss-Prot;Acc:Q9CXY6]	0.211788	0.0606922	0.362884	0.00728487	0.0149674	0.0166182	-0.109704	0.14294	0.791307	0.917255	0.238703	0.0537427	0.423663	0.0128331	0.0265648	-0.0271294	-0.145439	0.0911803	0.644947	0.988678	0.230695	0.0964497	0.364941	0.00129357	0.00311047	-0.0106249	-0.144139	0.122889	0.872789	0.978131	-0.0191221	-0.21466	0.176416	0.844027	0.93336	-0.0922955	-0.253069	0.0684781	0.252227	0.425301	-0.0102968	-0.212986	0.192392
ENSMUSG00000001017	66511	Chtop	protein_coding	MGI Symbol	9	Chromatin target of PRMT1 protein [Source:UniProtKB/Swiss-Prot;Acc:Q9CY57]	0.498043	0.33605	0.660036	3.04388e-07	2.1368e-06	-0.0937863	-0.22758	0.0400073	0.163903	0.47229	0.359464	0.178087	0.54084	0.000277825	0.000921806	0.0272631	-0.0985852	0.153111	0.663277	0.988678	0.357597	0.216967	0.498227	8.75854e-06	3.64341e-05	0.0806913	-0.0621615	0.223544	0.259786	0.730683	0.0291302	-0.162798	0.221058	0.760182	0.892469	0.0987758	-0.0684903	0.266042	0.239123	0.41165	0.044793	-0.158279	0.247866
ENSMUSG00000001018	20615	Snapin	protein_coding	MGI Symbol	5	SNARE-associated protein Snapin [Source:UniProtKB/Swiss-Prot;Acc:Q9Z266]	0.595488	0.429742	0.761235	1.18933e-08	1.34195e-07	0.122232	-0.0102996	0.254763	0.0695962	0.312085	0.546253	0.346436	0.746069	2.62562e-06	1.58453e-05	-0.0241095	-0.147209	0.0989895	0.693786	0.989332	0.461015	0.318125	0.603905	1.16895e-07	8.53831e-07	0.0928997	-0.0473625	0.233162	0.187789	0.649557	0.0611282	-0.151453	0.27371	0.563699	0.773129	-0.1834	-0.355025	-0.0117753	0.0368899	0.113555	0.171467	-0.0517681	0.394702
ENSMUSG00000001025	20200	S100a6	protein_coding	MGI Symbol	4	S100 calcium binding protein A6 (calcyclin) [Source:MGI Symbol;Acc:MGI:1339467]	0.922749	0.301964	1.54353	0.00465973	0.010081	-0.100469	-0.578652	0.377715	0.672805	0.863411	1.39319	0.480816	2.30556	0.00374619	0.00908699	-0.246727	-0.714189	0.220734	0.291828	0.972308	0.116746	-0.409836	0.643328	0.655918	0.714512	-0.305886	-0.82325	0.211479	0.238571	0.708259	1.02971	0.085686	1.97374	0.0333612	0.168962	0.386891	-0.29595	1.06973	0.258351	0.43293	-0.570907	-1.56546	0.423646
ENSMUSG00000001029	15896	Icam2	protein_coding	MGI Symbol	5	Intercellular adhesion molecule 2 [Source:UniProtKB/Swiss-Prot;Acc:P35330]	0.213501	-0.172345	0.599346	0.269469	0.345536	0.0904099	-0.232139	0.412959	0.573534	0.812089	0.805271	0.258688	1.35185	0.00499804	0.0116933	-0.0287491	-0.326802	0.269303	0.846129	0.994382	0.382787	0.0352793	0.730294	0.0317591	0.0525488	0.0574634	-0.281598	0.396525	0.733263	0.949319	0.393735	-0.181311	0.968782	0.173655	0.41896	0.309	-0.142451	0.760451	0.173803	0.332967	-0.501361	-1.08753	0.0848058
ENSMUSG00000001034	23939	Mapk7	protein_coding	MGI Symbol	14	Mitogen-activated protein kinase 7 [Source:UniProtKB/Swiss-Prot;Acc:Q9WVS8]	-0.995925	-1.34464	-0.647212	1.21173e-06	7.01593e-06	-0.0673729	-0.411148	0.276402	0.693601	0.874544	-0.948846	-1.36832	-0.529368	5.05348e-05	0.000208619	0.124342	-0.194662	0.443346	0.43472	0.983698	-0.145654	-0.481575	0.190267	0.385344	0.459209	-0.0697161	-0.419598	0.280166	0.688755	0.940792	-0.67885	-1.11133	-0.246367	0.00296971	0.0412315	-0.382594	-0.756611	-0.0085769	0.0452241	0.130343	-0.114452	-0.537986	0.309082
ENSMUSG00000001036	13855	Epn2	protein_coding	MGI Symbol	13	Epsin-2 [Source:UniProtKB/Swiss-Prot;Acc:Q8CHU3]	-0.0485275	-0.249208	0.152153	0.627076	0.694748	0.247983	0.0778516	0.418114	0.00543218	0.0803504	0.465748	0.209483	0.722013	0.000732266	0.00216627	-0.0352898	-0.190365	0.119785	0.647454	0.988678	0.101552	-0.0721122	0.275216	0.243658	0.312718	-0.0770389	-0.250691	0.0966136	0.374548	0.804554	0.328906	0.0609828	0.596829	0.0174989	0.117576	0.184398	-0.0289465	0.397742	0.0881903	0.207299	-0.266292	-0.543781	0.0111957
ENSMUSG00000001052	99683	Sec24b	protein_coding	MGI Symbol	9	Sec24 related gene family, member B (S. cerevisiae) [Source:MGI Symbol;Acc:MGI:2139764]	-0.361106	-0.555623	-0.166588	0.000583456	0.00158621	-0.0957478	-0.257413	0.0659178	0.237777	0.563711	-0.424998	-0.638286	-0.211709	0.000260558	0.000874386	-0.0556427	-0.207971	0.0966852	0.463919	0.983698	-0.31138	-0.479847	-0.142912	0.000611782	0.00159319	-0.00492025	-0.177738	0.167897	0.954312	0.993948	-0.169261	-0.394359	0.055838	0.136129	0.363618	-0.361713	-0.560144	-0.163283	0.000709532	0.00698246	-0.031856	-0.271007	0.207295
ENSMUSG00000001053	212706	N4bp3	protein_coding	MGI Symbol	3	NEDD4-binding protein 3 [Source:UniProtKB/Swiss-Prot;Acc:Q8C7U1]	-0.733924	-1.01028	-0.457567	4.29976e-06	2.11519e-05	-0.00162701	-0.263588	0.260333	0.990028	0.996705	-0.437859	-0.785364	-0.090355	0.0149325	0.0303155	-0.0766311	-0.323873	0.170611	0.533884	0.983698	-0.51756	-0.772065	-0.263055	0.000203716	0.000596675	-0.326493	-0.594275	-0.0587099	0.0182242	0.221898	0.00306928	-0.349639	0.355778	0.986028	0.994136	-0.011411	-0.297415	0.274593	0.936009	0.964624	-0.297692	-0.656174	0.0607901
ENSMUSG00000001054	66089	Rmnd5b	protein_coding	MGI Symbol	4	B [Source:UniProtKB/Swiss-Prot;Acc:Q91YQ7]	-0.573178	-0.75983	-0.386526	3.11464e-07	2.18014e-06	0.243089	0.0782624	0.407915	0.00495737	0.0764978	-0.482768	-0.693465	-0.272071	4.21538e-05	0.000179081	-0.11893	-0.27076	0.0328994	0.121	0.9248	-0.506046	-0.668096	-0.343996	2.24421e-07	1.49115e-06	0.108772	-0.0662664	0.283811	0.215895	0.685366	-0.0956524	-0.31383	0.122525	0.380138	0.633959	0.354465	0.162241	0.546689	0.000627299	0.00638406	0.152679	-0.0754983	0.380856
ENSMUSG00000001056	52530	Nhp2	protein_coding	MGI Symbol	2	H/ACA ribonucleoprotein complex subunit 2 [Source:UniProtKB/Swiss-Prot;Acc:Q9CRB2]	-0.257782	-0.450087	-0.0654764	0.0099796	0.0197961	-0.0114767	-0.178235	0.155281	0.889861	0.959807	-0.186097	-0.414592	0.0423974	0.107369	0.164628	0.0866695	-0.0685404	0.241879	0.265178	0.96496	-0.255712	-0.423261	-0.0881632	0.00376249	0.00802225	-0.0779922	-0.250609	0.0946247	0.365895	0.799482	0.156285	-0.0807646	0.393334	0.189774	0.440046	0.0528163	-0.143918	0.24955	0.589756	0.738659	-0.0831613	-0.330917	0.164594
ENSMUSG00000001062	72325	Vps9d1	protein_coding	MGI Symbol	13	VPS9 domain containing 1 [Source:MGI Symbol;Acc:MGI:1914143]	-0.405648	-0.644098	-0.167198	0.00142679	0.00352209	-0.107426	-0.309705	0.0948532	0.28889	0.612721	-0.558575	-0.824654	-0.292496	0.000136941	0.000495529	-0.0833579	-0.274832	0.108116	0.383446	0.983698	-0.515817	-0.7248	-0.306834	1.39909e-05	5.53457e-05	-0.183512	-0.398847	0.0318223	0.0925585	0.49754	-0.126115	-0.405059	0.152828	0.365586	0.6221	0.166624	-0.0785351	0.411784	0.176768	0.336858	0.045501	-0.249015	0.340017
ENSMUSG00000001065	57247	Zfp276	protein_coding	MGI Symbol	8	zinc finger protein (C2H2 type) 276 [Source:MGI Symbol;Acc:MGI:1888495]	-0.152317	-0.464203	0.15957	0.328855	0.409375	-0.137815	-0.399222	0.123592	0.292367	0.615791	-0.394147	-0.741114	-0.0471801	0.0270788	0.0506222	-0.273352	-0.522402	-0.0243027	0.0323378	0.777136	-0.534646	-0.808719	-0.260572	0.00033447	0.00093094	-0.453238	-0.733042	-0.173435	0.00225166	0.0702416	-0.132853	-0.498198	0.232491	0.465918	0.705296	0.32921	0.00556595	0.652855	0.0463792	0.132671	0.104015	-0.282412	0.490442
ENSMUSG00000001082	68294	Mfsd10	protein_coding	MGI Symbol	21	Mus musculus major facilitator superfamily domain containing 10 (Mfsd10), transcript variant 3, mRNA. [Source:RefSeq mRNA;Acc:NM_001356979]	-1.00131	-1.27408	-0.728536	7.3494e-09	8.96212e-08	0.0712838	-0.193048	0.335616	0.588086	0.820704	-0.760409	-1.08784	-0.432977	3.47704e-05	0.00015091	0.0527918	-0.190172	0.295756	0.662335	0.988678	-0.64027	-0.884395	-0.396145	5.29498e-06	2.33105e-05	0.136908	-0.139923	0.413739	0.322847	0.771796	-0.0673469	-0.395642	0.260948	0.680083	0.848722	0.264966	-0.017068	0.547	0.0647687	0.16726	-0.169617	-0.503902	0.164667
ENSMUSG00000001089	269593	Luzp1	protein_coding	MGI Symbol	7	Leucine zipper protein 1 [Source:UniProtKB/Swiss-Prot;Acc:Q8R4U7]	0.490698	0.311256	0.670141	2.61242e-06	1.36639e-05	-0.23729	-0.385609	-0.0889701	0.00251525	0.054082	0.605929	0.388304	0.823553	1.90759e-06	1.20437e-05	-0.150732	-0.291593	-0.00987054	0.0366472	0.787487	0.401344	0.239983	0.562706	1.24188e-05	4.97326e-05	-0.108649	-0.268232	0.0509341	0.17604	0.634536	0.0538527	-0.177569	0.285275	0.640074	0.821164	-0.220489	-0.411968	-0.0290097	0.0251802	0.0871576	-0.35252	-0.59244	-0.112601
ENSMUSG00000001095	20500	Slc13a2	protein_coding	MGI Symbol	1	Solute carrier family 13 member 2 [Source:UniProtKB/Swiss-Prot;Acc:Q9ES88]	-1.72486	-2.73623	-0.713488	0.00139259	0.00344947	0.527846	-0.492794	1.54849	0.301512	0.623197	-0.40198	-1.65476	0.850799	0.519642	0.606124	0.450536	-0.386457	1.28753	0.2825	0.971418	-0.137789	-0.976062	0.700485	0.740995	0.788578	-0.573741	-1.38668	0.239197	0.16112	0.613445	0.186344	-1.06729	1.43998	0.76498	0.894623	-0.747019	-1.6315	0.137458	0.0954051	0.218754	-0.795031	-2.04027	0.450207
ENSMUSG00000001098	330171	Kctd10	protein_coding	MGI Symbol	7	potassium channel tetramerisation domain containing 10 [Source:MGI Symbol;Acc:MGI:2141207]	0.00732107	-0.191738	0.20638	0.941002	0.955496	0.00928404	-0.161861	0.180429	0.913078	0.969753	0.0687532	-0.177784	0.31529	0.575472	0.656809	0.078968	-0.0796626	0.237599	0.319715	0.975895	0.0921401	-0.0832542	0.267534	0.29406	0.366397	-0.0336093	-0.210062	0.142844	0.701777	0.944662	0.0555811	-0.202062	0.313225	0.664596	0.83724	-0.158046	-0.36444	0.0483473	0.129291	0.270823	-0.0521481	-0.318821	0.214525
ENSMUSG00000001100	67811	Poldip2	protein_coding	MGI Symbol	6	Polymerase delta-interacting protein 2 [Source:UniProtKB/Swiss-Prot;Acc:Q91VA6]	0.115277	0.000334341	0.230219	0.0493708	0.0799873	-0.0926949	-0.187236	0.00184639	0.0544086	0.274717	-0.0804391	-0.202973	0.0420944	0.191635	0.268336	0.0226334	-0.0662413	0.111508	0.608946	0.985828	-0.131156	-0.229853	-0.0324583	0.0105855	0.0200575	0.0375326	-0.0635076	0.138573	0.456448	0.857741	0.0733499	-0.0564842	0.203184	0.259708	0.519533	0.028715	-0.0881272	0.145557	0.621487	0.764228	0.103021	-0.0358609	0.241902
ENSMUSG00000001103	18292	Sebox	protein_coding	MGI Symbol	2	Homeobox protein SEBOX [Source:UniProtKB/Swiss-Prot;Acc:P70368]	-0.801011	-1.54438	-0.0576447	0.0354288	0.0598017	-0.0546482	-0.775761	0.666465	0.878807	0.955164	-0.734858	-1.65272	0.183005	0.113259	0.172176	0.623756	-0.0118335	1.25934	0.0541955	0.828722	0.69648	-0.00879507	1.40176	0.0527775	0.082561	0.277504	-0.410001	0.965008	0.418706	0.832382	-0.807583	-1.77501	0.159843	0.0991724	0.308574	0.0989928	-0.808636	1.00662	0.826326	0.89969	-0.1208	-1.05625	0.814647
ENSMUSG00000001105	55978	Ift20	protein_coding	MGI Symbol	5	Intraflagellar transport [Source:UniProtKB/Swiss-Prot;Acc:Q61025]	-0.127467	-0.335051	0.0801176	0.221278	0.292642	-0.199621	-0.372791	-0.0264503	0.025034	0.179524	-0.095568	-0.329074	0.137938	0.412299	0.502866	0.0051466	-0.158238	0.168531	0.949457	0.998763	-0.192182	-0.372908	-0.0114562	0.0377681	0.0612276	-0.0377451	-0.222643	0.147153	0.681556	0.939426	0.101761	-0.144191	0.347713	0.407261	0.656949	0.16723	-0.0468975	0.381357	0.122075	0.261313	-0.231519	-0.491574	0.0285353
ENSMUSG00000001119	12833	Col6a1	protein_coding	MGI Symbol	2	Collagen alpha-1(VI) chain [Source:UniProtKB/Swiss-Prot;Acc:Q04857]	0.104626	-0.338774	0.548025	0.635412	0.702425	-0.0117759	-0.390371	0.366819	0.950091	0.983238	-0.293574	-0.806708	0.21956	0.253814	0.337976	-0.0370635	-0.392766	0.318639	0.83396	0.992883	-0.287219	-0.670518	0.096081	0.137452	0.19094	0.111852	-0.295614	0.519319	0.581446	0.911316	-0.0434192	-0.576055	0.489217	0.869718	0.945806	-0.0497035	-0.492548	0.393141	0.821367	0.89662	0.386424	-0.176227	0.949075
ENSMUSG00000001120	59093	Pcbp3	protein_coding	MGI Symbol	9	Mus musculus poly(rC) binding protein 3 (Pcbp3), transcript variant 2, mRNA. [Source:RefSeq mRNA;Acc:NM_001347216]	-1.08348	-1.51134	-0.655632	9.35263e-06	4.16538e-05	0.305539	-0.111861	0.722939	0.146507	0.445908	-0.823004	-1.31299	-0.33302	0.00161135	0.00435428	-0.268482	-0.654098	0.117134	0.166696	0.934297	-0.766455	-1.15353	-0.37938	0.000280737	0.000796752	-0.0343643	-0.478991	0.410262	0.87642	0.979243	-0.32503	-0.816163	0.166103	0.188136	0.438286	-0.0550221	-0.472431	0.362387	0.790898	0.876175	0.0450591	-0.453858	0.543977
ENSMUSG00000001123	16859	Lgals9	protein_coding	MGI Symbol	4	Galectin-9 [Source:UniProtKB/Swiss-Prot;Acc:O08573]	-0.717111	-0.903927	-0.530295	2.63421e-09	3.80616e-08	0.0332548	-0.116115	0.182624	0.654573	0.856	-0.695369	-0.893534	-0.497203	1.99768e-08	2.49701e-07	0.00940268	-0.131549	0.150354	0.893222	0.998135	-0.383359	-0.541142	-0.225577	1.78108e-05	6.8842e-05	-0.0838716	-0.244856	0.077113	0.298007	0.754114	-0.302607	-0.513076	-0.092137	0.0060317	0.0624671	-0.275299	-0.465444	-0.0851541	0.00571991	0.0300747	0.0115123	-0.216212	0.239237
ENSMUSG00000001127	11836	Araf	protein_coding	MGI Symbol	10	Serine/threonine-protein kinase A-Raf [Source:UniProtKB/Swiss-Prot;Acc:P04627]	-0.47448	-0.607442	-0.341518	1.38152e-08	1.52957e-07	-0.0473662	-0.155089	0.0603568	0.378754	0.688562	-0.597058	-0.738794	-0.455323	2.79754e-10	7.61669e-09	0.00801928	-0.0933148	0.109353	0.873489	0.997304	-0.387415	-0.500569	-0.274262	3.39497e-08	2.92571e-07	-0.0428602	-0.158202	0.0724816	0.456291	0.857741	-0.201624	-0.352037	-0.0512106	0.00998041	0.0853295	-0.0974582	-0.232494	0.037578	0.152104	0.30337	0.0752123	-0.0865394	0.236964
ENSMUSG00000001128	18636	Cfp	protein_coding	MGI Symbol	2	complement factor properdin [Source:MGI Symbol;Acc:MGI:97545]	-0.169569	-0.593426	0.254287	0.422805	0.505015	0.134789	-0.218665	0.488243	0.444645	0.738252	-0.272143	-0.739229	0.194943	0.245341	0.328411	-0.0977617	-0.429169	0.233645	0.553703	0.983698	0.0440646	-0.325983	0.414112	0.810687	0.847492	0.0435179	-0.333378	0.420414	0.816325	0.96783	-0.413969	-0.90922	0.0812819	0.098743	0.307925	-0.25161	-0.687107	0.183887	0.249251	0.422587	0.237363	-0.285029	0.759755
ENSMUSG00000001134	22294	Uxt	protein_coding	MGI Symbol	6	ubiquitously expressed transcript [Source:MGI Symbol;Acc:MGI:1277988]	-0.0308476	-0.2926	0.230905	0.812601	0.85334	0.0928057	-0.134359	0.319971	0.413132	0.716239	0.0893909	-0.240784	0.419566	0.586623	0.667116	0.15298	-0.0523316	0.358291	0.139616	0.9249	0.44554	0.211108	0.679971	0.000450328	0.00121791	0.127211	-0.103455	0.357877	0.271035	0.741194	-0.203169	-0.552198	0.145859	0.245772	0.504174	-0.213997	-0.497812	0.0698178	0.13509	0.278744	-0.0274329	-0.382293	0.327427
ENSMUSG00000001138	94218	Cnnm3	protein_coding	MGI Symbol	5	Mus musculus cyclin M3 (Cnnm3), transcript variant 3, mRNA. [Source:RefSeq mRNA;Acc:NM_001331209]	-0.765201	-0.967207	-0.563194	3.58531e-09	4.88588e-08	0.239713	0.0667818	0.412645	0.00789473	0.0980199	-0.509568	-0.73301	-0.286125	4.50564e-05	0.000189184	-0.125672	-0.286313	0.0349692	0.12146	0.9248	-0.386553	-0.562686	-0.210419	7.64921e-05	0.00025124	-0.0218841	-0.204366	0.160598	0.809368	0.966192	-0.248687	-0.483515	-0.0138597	0.0385173	0.183098	0.289079	0.0801902	0.497968	0.00798856	0.0385409	-0.0159201	-0.262553	0.230713
ENSMUSG00000001143	214895	Lman2l	protein_coding	MGI Symbol	8	VIP36-like protein [Source:UniProtKB/Swiss-Prot;Acc:P59481]	0.0150991	-0.189462	0.21966	0.881934	0.90859	-0.0812988	-0.253719	0.0911212	0.345612	0.664367	-0.156707	-0.392447	0.0790326	0.186221	0.262191	-0.0736109	-0.236745	0.0895236	0.366519	0.983698	-0.131484	-0.312171	0.0492026	0.148834	0.204649	0.063063	-0.122869	0.248995	0.496252	0.877085	-0.0988337	-0.347043	0.149376	0.424965	0.672723	0.302893	0.0849769	0.52081	0.00774195	0.037704	0.0905073	-0.169665	0.35068
ENSMUSG00000001150	54387	Mcm3ap	protein_coding	MGI Symbol	6	minichromosome maintenance complex component 3 associated protein [Source:MGI Symbol;Acc:MGI:1930089]	0.369507	0.219439	0.519576	1.45238e-05	6.146e-05	0.000248244	-0.123566	0.124062	0.996781	0.998996	0.444685	0.270467	0.618904	8.24318e-06	4.2465e-05	0.0174882	-0.0987671	0.133743	0.762244	0.990955	0.21787	0.0877069	0.348033	0.00166516	0.0038811	0.167285	0.0349619	0.299609	0.014626	0.197041	0.244303	0.060512	0.428094	0.0105654	0.088567	0.285818	0.128909	0.442727	0.000715021	0.00698885	-0.0749293	-0.268689	0.11883
ENSMUSG00000001151	18541	Pcnt	protein_coding	MGI Symbol	8	pericentrin [Source:HGNC Symbol;Acc:HGNC:16068]	-0.12375	-0.265596	0.0180968	0.0853644	0.128686	-0.0224494	-0.142411	0.097512	0.706742	0.882205	-0.0489272	-0.21434	0.116486	0.552636	0.636097	-0.0249677	-0.137738	0.0878025	0.656354	0.988678	-0.0451464	-0.170397	0.0801042	0.469811	0.543315	0.0222116	-0.105584	0.150008	0.726733	0.947576	-0.0287485	-0.20291	0.145413	0.739938	0.881696	-0.0927962	-0.240233	0.054641	0.210181	0.378746	-0.0972718	-0.279182	0.084638
ENSMUSG00000001155	14317	Ftcd	protein_coding	MGI Symbol	3	Formimidoyltransferase-cyclodeaminase Glutamate formimidoyltransferase Formimidoyltetrahydrofolate cyclodeaminase [Source:UniProtKB/Swiss-Prot;Acc:Q91XD4]	-0.31653	-0.536978	-0.0960816	0.006093	0.0127629	-0.0427961	-0.221288	0.135696	0.62999	0.842398	-0.283213	-0.514977	-0.0514498	0.0179831	0.0354826	-0.0632862	-0.230869	0.104296	0.449048	0.983698	-0.291785	-0.478376	-0.105194	0.00306698	0.00669763	-0.131444	-0.322765	0.0598764	0.172229	0.632156	-0.0547143	-0.300573	0.191145	0.654704	0.831067	-0.076935	-0.299684	0.145814	0.488442	0.656259	-0.0761127	-0.341541	0.189316
ENSMUSG00000001156	17119	Mxd1	protein_coding	MGI Symbol	4	MAX dimerization protein 1 [Source:HGNC Symbol;Acc:HGNC:6761]	-0.127689	-0.361416	0.106038	0.275489	0.352005	0.0216665	-0.181996	0.225329	0.83053	0.934671	-0.175141	-0.456351	0.106069	0.214889	0.294695	0.23117	0.0454632	0.416876	0.0160902	0.667388	0.0891407	-0.113088	0.29137	0.377589	0.451625	0.026219	-0.178789	0.231227	0.796981	0.964447	-0.0331118	-0.325496	0.259273	0.819787	0.922	0.226635	-0.0226982	0.475967	0.073544	0.182274	0.0691188	-0.234573	0.372811
ENSMUSG00000001157	23885	Gmcl1	protein_coding	MGI Symbol	4	germ cell-less, spermatogenesis associated 1 [Source:MGI Symbol;Acc:MGI:1345156]	0.2393	0.0251096	0.453491	0.0295424	0.0509586	0.0505086	-0.127895	0.228912	0.569705	0.810024	0.309862	0.0429245	0.576799	0.024101	0.0457737	0.00238489	-0.163492	0.168262	0.976918	0.998763	0.194994	0.00827362	0.381715	0.0411371	0.0661198	-0.028242	-0.214418	0.157934	0.760306	0.957541	0.117252	-0.163114	0.397618	0.402261	0.652991	0.277052	0.0425812	0.511523	0.0218369	0.0784065	-0.0200528	-0.312124	0.272018
ENSMUSG00000001158	66618	Snrnp27	protein_coding	MGI Symbol	4	U4/U6.U5 small nuclear ribonucleoprotein 27 kDa protein [Source:UniProtKB/Swiss-Prot;Acc:Q8K194]	0.340042	0.104723	0.575362	0.00580544	0.0122569	-0.0510842	-0.246313	0.144145	0.59918	0.828353	0.647752	0.331663	0.96384	0.000185351	0.000650056	0.162568	-0.0182414	0.343376	0.0765849	0.859946	0.583229	0.373634	0.792825	1.92754e-06	9.72533e-06	-0.104119	-0.302368	0.0941305	0.294187	0.754114	0.22709	-0.106302	0.560483	0.175842	0.421651	-0.389604	-0.639426	-0.139782	0.00313892	0.0199732	-0.358793	-0.701099	-0.0164882
ENSMUSG00000001166	114643	Oas1c	protein_coding	MGI Symbol	3	Inactive 2'-5' oligoadenylate synthetase 1C [Source:UniProtKB/Swiss-Prot;Acc:Q924S2]	0.0565105	-0.461487	0.574508	0.826284	0.862825	0.456376	0.0261602	0.886591	0.0382094	0.22794	0.484711	-0.148065	1.11749	0.129167	0.192396	-0.206601	-0.59351	0.180308	0.286304	0.972308	0.403092	-0.055845	0.862029	0.0833551	0.123591	-0.499587	-0.914352	-0.0848209	0.0195689	0.229751	-0.124982	-0.804195	0.554231	0.711414	0.867298	-0.128273	-0.686008	0.429462	0.643969	0.780515	0.0281757	-0.667268	0.723619
ENSMUSG00000001173	320634	Ocrl	protein_coding	MGI Symbol	7	Inositol polyphosphate 5-phosphatase OCRL-1 [Source:UniProtKB/Swiss-Prot;Acc:Q6NVF0]	0.457983	0.163562	0.752404	0.003208	0.00721424	0.512217	0.281442	0.742993	6.56415e-05	0.00626828	0.642944	0.295737	0.990151	0.00059957	0.00181591	-0.192138	-0.398608	0.0143322	0.0672294	0.833119	0.478033	0.232001	0.724066	0.000350269	0.000969098	0.0180137	-0.219325	0.255352	0.878623	0.979566	-0.0272275	-0.399322	0.344867	0.882948	0.953023	-0.319311	-0.612155	-0.0264671	0.0334201	0.106145	0.327257	-0.0651446	0.719659
ENSMUSG00000001175	12313	Calm1	protein_coding	MGI Symbol	4	Calmodulin-1 [Source:UniProtKB/Swiss-Prot;Acc:P0DP26]	0.021471	-0.159216	0.202158	0.811074	0.852113	-0.0979549	-0.246082	0.0501723	0.188467	0.503283	0.215487	0.0274349	0.403539	0.0258524	0.0486516	-0.0640739	-0.20293	0.0747819	0.355893	0.981721	-0.00931543	-0.162406	0.143775	0.90255	0.92222	0.0319998	-0.125594	0.189594	0.683157	0.939426	0.160728	-0.038066	0.359523	0.109864	0.324999	0.373263	0.194582	0.551944	0.000145768	0.00229465	-0.291971	-0.506609	-0.0773322
ENSMUSG00000001211	28169	Agpat3	protein_coding	MGI Symbol	13	1-acyl-sn-glycerol-3-phosphate acyltransferase gamma [Source:UniProtKB/Swiss-Prot;Acc:Q9D517]	-0.133354	-0.304276	0.0375675	0.122435	0.176042	-0.0924734	-0.231749	0.0468026	0.186731	0.501428	-0.332658	-0.513729	-0.151587	0.000652895	0.00195851	-0.0970829	-0.227525	0.0333591	0.140055	0.9249	-0.491445	-0.637525	-0.345364	4.92513e-08	4.05026e-07	-0.102284	-0.250868	0.0463005	0.171407	0.631243	0.0617038	-0.130939	0.254346	0.520378	0.743949	0.303707	0.130809	0.476605	0.00104053	0.0091386	0.10683	-0.0995755	0.313236
ENSMUSG00000001227	20359	Sema6b	protein_coding	MGI Symbol	2	sema domain, transmembrane domain (TM), and cytoplasmic domain, (semaphorin) 6B [Source:MGI Symbol;Acc:MGI:1202889]	-1.27298	-1.67521	-0.870753	1.72182e-07	1.30159e-06	-0.0646256	-0.449373	0.320122	0.735545	0.893918	-1.16467	-1.62662	-0.702717	1.0034e-05	5.03718e-05	0.216946	-0.137697	0.571588	0.222991	0.950593	-0.361965	-0.728762	0.0048329	0.0529386	0.0827511	-0.418469	-0.790507	-0.0464295	0.0285249	0.281713	-0.585758	-1.0571	-0.11441	0.016255	0.11217	-0.205443	-0.619539	0.208653	0.321336	0.499783	-0.17294	-0.649551	0.30367
ENSMUSG00000001228	18140	Uhrf1	protein_coding	MGI Symbol	7	ubiquitin-like, containing PHD and RING finger domains, 1 [Source:MGI Symbol;Acc:MGI:1338889]	-0.835256	-1.81928	0.148768	0.0938187	0.139663	0.0873207	-0.852545	1.02719	0.851721	0.943153	-0.520998	-1.74935	0.707358	0.395685	0.485889	-0.0880609	-0.965073	0.788951	0.839909	0.994339	-0.598464	-1.50308	0.306156	0.188288	0.250773	-0.950283	-1.83735	-0.0632206	0.0364496	0.318554	-0.0105946	-1.25881	1.23762	0.986372	0.994153	-0.487273	-1.43608	0.461536	0.304849	0.48252	-0.226937	-1.4894	1.03553
ENSMUSG00000001229	224897	Dpp9	protein_coding	MGI Symbol	2	Dipeptidyl peptidase 9 [Source:UniProtKB/Swiss-Prot;Acc:Q8BVG4]	-0.636031	-0.80556	-0.466502	4.47425e-09	5.88128e-08	-0.0482584	-0.184533	0.0880166	0.477584	0.757115	-0.513915	-0.692791	-0.33504	1.08788e-06	7.38156e-06	-0.0520307	-0.180063	0.0760016	0.415574	0.983698	-0.453923	-0.597042	-0.310803	1.64941e-07	1.14919e-06	-0.186064	-0.33225	-0.0398787	0.0140184	0.192106	-0.112023	-0.30199	0.0779431	0.239771	0.497748	0.187487	0.0177323	0.357241	0.0313337	0.101682	-0.170374	-0.375717	0.0349686
ENSMUSG00000001240	54409	Ramp2	protein_coding	MGI Symbol	8	Receptor activity-modifying protein 2 [Source:UniProtKB/Swiss-Prot;Acc:Q9WUP0]	-0.533363	-0.791147	-0.275578	0.0001645	0.000518785	0.0841418	-0.148784	0.317067	0.468844	0.751285	-0.503438	-0.804762	-0.202113	0.0016942	0.00454762	0.0281886	-0.186773	0.243151	0.791959	0.992101	-0.507802	-0.731663	-0.28394	4.8575e-05	0.000168656	-0.00482976	-0.24586	0.236201	0.967835	0.993948	0.0325526	-0.275184	0.340289	0.831477	0.926494	0.059701	-0.19659	0.315992	0.639732	0.777738	0.0542168	-0.266711	0.375145
ENSMUSG00000001247	54135	Lsr	protein_coding	MGI Symbol	5	Lipolysis-stimulated lipoprotein receptor [Source:UniProtKB/Swiss-Prot;Acc:Q99KG5]	-1.50793	-1.77387	-1.24198	8.83746e-14	1.23411e-11	-0.102762	-0.309392	0.103869	0.320185	0.641605	-1.0869	-1.36425	-0.809545	1.61907e-09	3.19072e-08	0.118888	-0.0757991	0.313575	0.223784	0.950593	-0.413739	-0.632226	-0.195253	0.000468872	0.00126097	-0.280812	-0.50516	-0.0564639	0.0155573	0.204496	-0.554268	-0.848813	-0.259724	0.000502826	0.0154014	-0.832225	-1.10043	-0.564024	2.54255e-07	4.38204e-05	-0.523791	-0.847755	-0.199828
ENSMUSG00000001248	52857	Gramd1a	protein_coding	MGI Symbol	14	GRAM domain-containing protein 1A [Source:UniProtKB/Swiss-Prot;Acc:Q8VEF1]	-0.474547	-0.665895	-0.283198	1.29941e-05	5.5566e-05	-0.0496379	-0.216098	0.116822	0.549421	0.798759	-0.266409	-0.492292	-0.0405254	0.0220666	0.0423895	0.0533949	-0.102576	0.209366	0.492266	0.983698	-0.0813698	-0.252754	0.0900149	0.342325	0.415804	-0.068978	-0.243268	0.105312	0.427761	0.838334	-0.131644	-0.368433	0.105145	0.267242	0.528341	-0.084105	-0.28531	0.1171	0.40249	0.578992	-0.257776	-0.502579	-0.0129726
ENSMUSG00000001249	15451	Hpn	protein_coding	MGI Symbol	11	Serine protease hepsin Serine protease hepsin non-catalytic chain Serine protease hepsin catalytic chain [Source:UniProtKB/Swiss-Prot;Acc:O35453]	-0.65226	-0.833884	-0.470637	1.20027e-08	1.35078e-07	0.00903623	-0.13636	0.154432	0.900479	0.964434	-0.598961	-0.790788	-0.407133	2.24966e-07	1.89717e-06	0.0556841	-0.081592	0.19296	0.416429	0.983698	-0.535231	-0.689878	-0.380583	2.69325e-08	2.37617e-07	0.0238004	-0.132568	0.180168	0.759523	0.957384	-0.00804598	-0.212665	0.196573	0.936931	0.973962	0.432318	0.249841	0.614796	2.59864e-05	0.000713554	-0.0442634	-0.264819	0.176292
ENSMUSG00000001270	12709	Ckb	protein_coding	MGI Symbol	5	Creatine kinase B-type [Source:UniProtKB/Swiss-Prot;Acc:Q04447]	-0.706749	-1.06669	-0.346808	0.000309976	0.000908316	0.440864	0.113113	0.768614	0.00974669	0.107584	-0.119549	-0.550419	0.311322	0.577407	0.658427	-0.0235224	-0.310838	0.263793	0.869161	0.997304	-0.180705	-0.489987	0.128576	0.244042	0.312994	-0.0190362	-0.34223	0.304158	0.905656	0.984892	0.0376346	-0.408184	0.483453	0.86513	0.943045	0.0841563	-0.282018	0.45033	0.644203	0.780581	-0.146337	-0.602173	0.309499
ENSMUSG00000001280	20683	Sp1	protein_coding	MGI Symbol	6	Transcription factor Sp1 [Source:UniProtKB/Swiss-Prot;Acc:O89090]	0.363593	0.169466	0.55772	0.000529552	0.00145551	0.0769399	-0.0837724	0.237652	0.338359	0.657432	0.551579	0.337102	0.766056	7.30111e-06	3.82516e-05	0.0498751	-0.101561	0.201311	0.508736	0.983698	0.463634	0.295613	0.631655	2.233e-06	1.10266e-05	0.0556606	-0.116364	0.227685	0.516166	0.887308	0.13782	-0.0886719	0.364311	0.225398	0.482088	-0.25757	-0.455832	-0.0593086	0.0122945	0.0523686	-0.111046	-0.351581	0.129489
ENSMUSG00000001281	16421	Itgb7	protein_coding	MGI Symbol	5	Integrin beta-7 [Source:UniProtKB/Swiss-Prot;Acc:P26011]	-0.258783	-0.636873	0.119308	0.173812	0.238161	0.38088	0.0518711	0.709889	0.0244612	0.17688	-0.0655839	-0.509062	0.377894	0.766142	0.819932	-0.226864	-0.525637	0.0719086	0.13244	0.9248	0.453384	0.0922428	0.814525	0.0152739	0.0276539	-0.0889216	-0.429636	0.251792	0.600121	0.916238	-0.745832	-1.23351	-0.258154	0.00369871	0.0469711	-0.251937	-0.687846	0.183973	0.249087	0.422517	0.187681	-0.293337	0.668699
ENSMUSG00000001285	60315	Myg1	protein_coding	MGI Symbol	10	UPF0160 protein MYG1, mitochondrial [Source:UniProtKB/Swiss-Prot;Acc:Q9JK81]	-0.678594	-0.884136	-0.473052	7.29416e-08	6.28178e-07	0.179806	-0.00155381	0.361165	0.0518941	0.268827	-0.701103	-0.929288	-0.472917	3.08189e-07	2.49685e-06	-0.0201495	-0.187144	0.146845	0.808224	0.992101	-0.390147	-0.5697	-0.210595	8.74166e-05	0.000283183	-0.00406536	-0.192533	0.184402	0.965376	0.993948	-0.331105	-0.568635	-0.0935738	0.00758346	0.072012	0.0264027	-0.18206	0.234865	0.798903	0.8819	0.202314	-0.0455272	0.450155
ENSMUSG00000001288	19411	Rarg	protein_coding	MGI Symbol	7	Retinoic acid receptor gamma [Source:UniProtKB/Swiss-Prot;Acc:P18911]	-0.231136	-0.529124	0.0668531	0.124562	0.178553	0.222872	-0.0371073	0.482851	0.0907144	0.353362	0.0385796	-0.325371	0.40253	0.83113	0.872444	-0.0955272	-0.334162	0.143108	0.422525	0.983698	-0.0430081	-0.306359	0.220343	0.742605	0.790056	-0.134135	-0.400832	0.132563	0.314814	0.767764	-0.0139396	-0.394553	0.366674	0.94125	0.975866	-0.108947	-0.417077	0.199183	0.478264	0.648149	-0.0468433	-0.438848	0.345162
ENSMUSG00000001289	56612	Pfdn5	protein_coding	MGI Symbol	8	Prefoldin subunit 5 [Source:UniProtKB/Swiss-Prot;Acc:Q9WU28]	-0.189538	-0.451375	0.0722986	0.150915	0.210678	-0.0465192	-0.264643	0.171605	0.668181	0.861384	-0.472168	-0.759309	-0.185027	0.00196411	0.00516864	0.049046	-0.155897	0.253989	0.630629	0.988678	-0.15333	-0.380146	0.0734858	0.179044	0.240211	-0.096179	-0.327788	0.13543	0.405553	0.825079	-0.269792	-0.572932	0.0333483	0.079495	0.273846	-0.26623	-0.533463	0.00100338	0.0508226	0.141607	0.236111	-0.0854948	0.557716
ENSMUSG00000001300	13642	Efnb2	protein_coding	MGI Symbol	3	Ephrin-B2 [Source:UniProtKB/Swiss-Prot;Acc:P52800]	1.25663	0.813305	1.69996	1.38797e-06	7.88863e-06	0.149666	-0.160973	0.460305	0.335322	0.655628	1.05516	0.502477	1.60784	0.000427924	0.00135481	-0.0619233	-0.348168	0.224321	0.66372	0.988678	0.772869	0.418445	1.12729	8.33634e-05	0.000271271	0.109407	-0.219785	0.438599	0.504902	0.882996	0.220368	-0.370512	0.811248	0.454662	0.696554	-0.110352	-0.557117	0.336413	0.619729	0.762884	0.35114	-0.28565	0.987931
ENSMUSG00000001305	67223	Rrp15	protein_coding	MGI Symbol	2	RRP15-like protein [Source:UniProtKB/Swiss-Prot;Acc:Q9CYX7]	0.340769	0.105992	0.575547	0.00561155	0.0118983	-0.0719892	-0.267745	0.123767	0.460928	0.747676	0.377457	0.0724652	0.682449	0.016668	0.033246	0.173127	-0.00807756	0.354331	0.0605536	0.832028	0.742741	0.527543	0.957939	2.85805e-08	2.49781e-07	-0.0504699	-0.249328	0.148388	0.610163	0.919255	-0.192157	-0.518493	0.134179	0.240453	0.498881	-0.430756	-0.689398	-0.172113	0.00174542	0.0130801	-0.108677	-0.440068	0.222714
ENSMUSG00000001313	11858	Rnd2	protein_coding	MGI Symbol	3	Rho family GTPase 2 [Source:MGI Symbol;Acc:MGI:1338755]	-1.05597	-1.52442	-0.587526	5.30178e-05	0.000190415	-0.53774	-0.982978	-0.0925023	0.0192643	0.155976	-1.15353	-1.71787	-0.589185	0.000191314	0.000668262	0.195014	-0.237275	0.627303	0.366634	0.983698	-0.912264	-1.34471	-0.479815	0.000128675	0.000397976	-0.983244	-1.41909	-0.547398	5.24519e-05	0.00730411	-0.0462485	-0.610713	0.518216	0.86906	0.945519	-1.35038	-1.80957	-0.891181	7.08808e-07	8.14627e-05	-0.440186	-1.02301	0.14264
ENSMUSG00000001323	27364	Srr	protein_coding	MGI Symbol	10	Serine racemase [Source:UniProtKB/Swiss-Prot;Acc:Q9QZX7]	0.228854	0.0333945	0.424314	0.0229823	0.0408528	-0.0331817	-0.19464	0.128277	0.679539	0.868127	-0.108295	-0.317857	0.101268	0.301887	0.389819	0.0651853	-0.0870036	0.217374	0.391096	0.983698	0.123166	-0.0450266	0.291358	0.146354	0.201701	0.143598	-0.0290885	0.316284	0.100436	0.514135	-0.166275	-0.387733	0.0551828	0.136696	0.364457	-0.0297691	-0.228109	0.16857	0.762761	0.858106	0.303967	0.0672139	0.54072
ENSMUSG00000001334	384061	Fndc5	protein_coding	MGI Symbol	1	Fibronectin type III domain-containing protein 5 Irisin [Source:UniProtKB/Swiss-Prot;Acc:Q8K4Z2]	-1.67853	-2.18791	-1.16916	7.58357e-08	6.49656e-07	0.421071	-0.0900681	0.932211	0.103535	0.376131	-0.66535	-1.28602	-0.0446747	0.0363332	0.0651469	-0.211054	-0.675267	0.253159	0.362938	0.983698	-1.70673	-2.13706	-1.27641	1.21673e-09	1.74028e-08	-0.448945	-0.953948	0.0560587	0.0798187	0.465263	0.830331	0.234579	1.42608	0.00759101	0.072012	0.389041	-0.0553116	0.833394	0.0843019	0.200886	-0.592111	-1.21133	0.0271116
ENSMUSG00000001348	11433	Acp5	protein_coding	MGI Symbol	6	Tartrate-resistant acid phosphatase type 5 [Source:UniProtKB/Swiss-Prot;Acc:Q05117]	-0.332256	-0.50109	-0.163422	0.000301898	0.000887049	-0.0747335	-0.21153	0.0620628	0.275491	0.600807	-0.394116	-0.572696	-0.215536	7.09319e-05	0.000280339	-0.0420942	-0.170519	0.0863301	0.51075	0.983698	-0.422213	-0.565807	-0.278618	7.10741e-07	4.05263e-06	-0.0769009	-0.223219	0.069417	0.29384	0.754114	-0.0139981	-0.203781	0.175785	0.88202	0.952819	0.464016	0.295094	0.632937	2.41609e-06	0.00016924	-0.0128731	-0.217036	0.19129
ENSMUSG00000001366	71538	Fbxo9	protein_coding	MGI Symbol	7	F-box only protein 9 [Source:UniProtKB/Swiss-Prot;Acc:Q8BK06]	0.475019	0.28841	0.661627	8.6101e-06	3.8732e-05	0.0442048	-0.1104	0.19881	0.565903	0.807562	0.544852	0.339309	0.750394	4.43515e-06	2.48917e-05	-0.00707194	-0.152645	0.138501	0.922126	0.998646	0.447462	0.286043	0.608881	2.06117e-06	1.03074e-05	0.155348	-0.00977256	0.320468	0.0644068	0.427389	0.0903177	-0.126736	0.307372	0.404611	0.654831	0.425477	0.233853	0.617101	6.53096e-05	0.00132321	-0.0256283	-0.256209	0.204953
ENSMUSG00000001376	73288	Vps50	protein_coding	MGI Symbol	9	VPS50 EARP/GARPII complex subunit [Source:MGI Symbol;Acc:MGI:1920538]	0.515613	0.336742	0.694484	1.02402e-06	6.04225e-06	-0.0208033	-0.165464	0.123858	0.772403	0.90934	0.878148	0.634014	1.12228	1.15866e-08	1.59233e-07	-0.0139046	-0.149728	0.121918	0.836825	0.993636	0.4763	0.317331	0.635269	4.99165e-07	2.9874e-06	-0.0222462	-0.174978	0.130486	0.769563	0.95881	0.387943	0.130213	0.645673	0.00421282	0.0503329	0.0570787	-0.141303	0.25546	0.563469	0.715991	-0.383339	-0.649176	-0.117501
ENSMUSG00000001380	15115	Hars	protein_coding	MGI Symbol	1	Histidine--tRNA ligase, cytoplasmic [Source:UniProtKB/Swiss-Prot;Acc:Q61035]	-0.295413	-0.472153	-0.118672	0.00168753	0.00409262	0.00220482	-0.145667	0.150076	0.976063	0.991808	-0.0472235	-0.246705	0.152258	0.634314	0.709852	0.0139802	-0.124822	0.152783	0.839423	0.994126	-0.0202945	-0.174481	0.133892	0.7912	0.830665	-0.0153987	-0.172505	0.141708	0.843677	0.973271	-0.0129489	-0.223425	0.197527	0.901478	0.961237	0.211069	0.0271687	0.39497	0.0256296	0.0882975	-0.245984	-0.467714	-0.0242549
ENSMUSG00000001383	66492	Zmat2	protein_coding	MGI Symbol	1	zinc finger, matrin type 2 [Source:MGI Symbol;Acc:MGI:1913742]	0.239686	0.0366132	0.44276	0.0219736	0.0392533	0.0880444	-0.0798621	0.255951	0.294935	0.618492	0.00101245	-0.222835	0.22486	0.992738	0.995178	0.0334398	-0.124161	0.191041	0.66977	0.988678	0.353616	0.177175	0.530058	0.000243127	0.000700815	-0.024421	-0.203123	0.15428	0.783416	0.960646	-0.319164	-0.556653	-0.0816746	0.00980706	0.0845152	-0.50259	-0.710624	-0.294556	1.9412e-05	0.000594583	0.326719	0.0754143	0.578023
ENSMUSG00000001403	68612	Ube2c	protein_coding	MGI Symbol	2	ubiquitin-conjugating enzyme E2C [Source:MGI Symbol;Acc:MGI:1915862]	-1.90482	-3.32301	-0.486643	0.00984523	0.0195684	0.508567	-0.93959	1.95673	0.481226	0.759193	-1.32449	-2.89792	0.248933	0.0964671	0.15061	0.201905	-1.03941	1.44322	0.743602	0.990955	-0.596997	-1.8279	0.633907	0.332155	0.40569	-0.781598	-2.01355	0.450351	0.206626	0.673322	-0.52559	-2.09081	1.03963	0.500527	0.728984	-0.215085	-1.55147	1.1213	0.746198	0.848978	-0.0717642	-1.61764	1.47412
ENSMUSG00000001415	229512	Smg5	protein_coding	MGI Symbol	9	Protein SMG5 [Source:UniProtKB/Swiss-Prot;Acc:Q6ZPY2]	-0.0885731	-0.235195	0.0580486	0.228708	0.300752	-0.316312	-0.437651	-0.194972	5.85275e-06	0.0013335	-0.342404	-0.502838	-0.181969	0.00011071	0.000411737	-0.0317201	-0.14606	0.0826199	0.57746	0.983698	-0.383192	-0.509768	-0.256617	4.09834e-07	2.52371e-06	-0.00291746	-0.132628	0.126793	0.963898	0.993948	0.0090683	-0.160304	0.178441	0.914204	0.965527	0.252092	0.102409	0.401775	0.00157082	0.0121574	-0.0624812	-0.242797	0.117835
ENSMUSG00000001416	12462	Cct3	protein_coding	MGI Symbol	10	chaperonin containing Tcp1, subunit 3 (gamma) [Source:MGI Symbol;Acc:MGI:104708]	0.144478	-0.0306513	0.319607	0.103055	0.151692	-0.076718	-0.22099	0.0675542	0.288281	0.612351	0.195283	0.00778564	0.38278	0.0416506	0.0731556	-0.0589702	-0.194425	0.0764846	0.383444	0.983698	0.103535	-0.0461917	0.253262	0.169532	0.229107	-0.0417726	-0.195778	0.112233	0.585932	0.913286	0.0327775	-0.165276	0.230831	0.739287	0.881487	0.247956	0.0718035	0.424108	0.00706311	0.0350913	-0.127523	-0.339681	0.0846347
ENSMUSG00000001418	56700	Glmp	protein_coding	MGI Symbol	10	Glycosylated lysosomal membrane protein [Source:UniProtKB/Swiss-Prot;Acc:Q9JHJ3]	-0.392451	-0.549132	-0.235771	1.11231e-05	4.83454e-05	-0.0874316	-0.21556	0.0406967	0.175085	0.488156	-0.445795	-0.613994	-0.277596	4.44626e-06	2.49432e-05	-0.0368986	-0.157347	0.08355	0.538622	0.983698	-0.351706	-0.485612	-0.2178	5.16946e-06	2.28043e-05	-0.0534977	-0.190321	0.0833258	0.433301	0.843262	-0.130987	-0.309071	0.0470966	0.144624	0.376334	-0.0441012	-0.202936	0.114733	0.577137	0.727909	-0.0340883	-0.224936	0.156759
ENSMUSG00000001419	17261	Mef2d	protein_coding	MGI Symbol	7	Myocyte-specific enhancer factor 2D [Source:UniProtKB/Swiss-Prot;Acc:Q63943]	-0.778816	-1.05231	-0.505327	1.27705e-06	7.35155e-06	-0.316163	-0.536783	-0.0955437	0.0061826	0.0856007	-0.944755	-1.23534	-0.654171	9.99788e-08	9.59663e-07	-0.00971322	-0.216834	0.197408	0.924816	0.998763	-0.47014	-0.700484	-0.239797	0.000194782	0.000573612	-0.203738	-0.439127	0.0316513	0.0877611	0.485002	-0.484328	-0.791895	-0.17676	0.00288867	0.0403917	-0.292035	-0.566705	-0.0173644	0.0377972	0.115228	-0.150225	-0.482734	0.182283
ENSMUSG00000001420	71913	Tmem79	protein_coding	MGI Symbol	4	Transmembrane protein 79 [Source:UniProtKB/Swiss-Prot;Acc:Q9D709]	-0.354502	-0.726762	0.0177589	0.0613617	0.0966296	-0.0809684	-0.42487	0.262933	0.636157	0.84611	-0.785488	-1.21647	-0.354504	0.000710889	0.00211384	0.156978	-0.161685	0.475641	0.324724	0.97665	-0.365298	-0.688975	-0.0416212	0.028027	0.0471607	-0.0223863	-0.372354	0.327581	0.897586	0.983847	-0.263211	-0.697915	0.171493	0.22765	0.48464	-0.316199	-0.669627	0.0372282	0.0779922	0.190392	0.350018	-0.103917	0.803952
ENSMUSG00000001424	56463	Snd1	protein_coding	MGI Symbol	12	Staphylococcal nuclease domain-containing protein 1 [Source:UniProtKB/Swiss-Prot;Acc:Q78PY7]	-0.302116	-0.510979	-0.0932531	0.00576104	0.0121795	-0.139863	-0.309013	0.0292871	0.102301	0.374532	-0.132597	-0.350217	0.0850231	0.224795	0.305789	0.013697	-0.144988	0.172382	0.862127	0.996749	-0.175835	-0.352099	0.000428965	0.0505318	0.0793923	0.0361108	-0.144351	0.216573	0.687507	0.940148	0.0569351	-0.173817	0.287688	0.620105	0.808265	0.19134	-0.0165379	0.399218	0.0701308	0.176647	-0.309382	-0.559123	-0.0596407
ENSMUSG00000001435	12822	Col18a1	protein_coding	MGI Symbol	5	Collagen alpha-1(XVIII) chain Endostatin Non-collagenous domain 1 [Source:UniProtKB/Swiss-Prot;Acc:P39061]	0.103813	-0.0773871	0.285013	0.253163	0.327318	-0.0698149	-0.218907	0.0792766	0.348904	0.667534	-0.132679	-0.324886	0.0595285	0.170257	0.243329	-0.00387258	-0.144004	0.136259	0.955651	0.998763	0.0492969	-0.105095	0.203689	0.52168	0.59264	-0.0114385	-0.170984	0.148107	0.885297	0.981526	-0.185848	-0.388688	0.0169908	0.0713662	0.257955	-0.0960473	-0.278876	0.0867816	0.294052	0.471347	0.166677	-0.05138	0.384734
ENSMUSG00000001436	20509	Slc19a1	protein_coding	MGI Symbol	9	solute carrier family 19 (folate transporter), member 1 [Source:MGI Symbol;Acc:MGI:103182]	-0.499751	-0.710691	-0.288811	2.59859e-05	0.000102204	-0.0140175	-0.202355	0.17432	0.880958	0.955327	-0.553193	-0.799087	-0.307299	5.45052e-05	0.000222807	-0.0567113	-0.23413	0.120708	0.521228	0.983698	-0.618419	-0.804868	-0.431971	6.62501e-08	5.26232e-07	-0.210579	-0.406911	-0.0142467	0.0362369	0.318147	0.00851462	-0.243972	0.261001	0.945895	0.97803	0.165739	-0.0490308	0.380509	0.126431	0.266941	0.0394245	-0.224182	0.303031
ENSMUSG00000001440	16211	Kpnb1	protein_coding	MGI Symbol	3	Importin subunit beta-1 [Source:UniProtKB/Swiss-Prot;Acc:P70168]	-0.173495	-0.339832	-0.00715768	0.0413721	0.0684371	0.0667354	-0.0692233	0.202694	0.326438	0.647937	0.17001	-0.00448223	0.344502	0.0558668	0.0945209	-0.030206	-0.158464	0.0980524	0.636059	0.988678	0.0970224	-0.0441989	0.238244	0.172237	0.23229	-0.0424257	-0.188491	0.103639	0.559783	0.902869	0.0427814	-0.141449	0.227011	0.640771	0.821571	-0.417513	-0.586308	-0.248718	1.35367e-05	0.000472584	-0.276769	-0.475844	-0.0776945
ENSMUSG00000001441	19155	Npepps	protein_coding	MGI Symbol	19	Puromycin-sensitive aminopeptidase [Source:UniProtKB/Swiss-Prot;Acc:Q11011]	-0.173508	-0.335546	-0.0114689	0.0365305	0.0614138	-0.244789	-0.379507	-0.110071	0.000733977	0.0268512	-0.468017	-0.645935	-0.290099	5.04046e-06	2.78318e-05	0.0150914	-0.111973	0.142156	0.811169	0.992101	-0.236463	-0.376999	-0.0959267	0.00158503	0.00372854	-0.042909	-0.186754	0.100936	0.549283	0.899277	-0.216463	-0.404239	-0.0286875	0.02503	0.143011	0.0092402	-0.156636	0.175116	0.91075	0.950144	0.0497208	-0.149684	0.249126
ENSMUSG00000001445	107732	Mrpl10	protein_coding	MGI Symbol	2	39S ribosomal protein L10, mitochondrial [Source:UniProtKB/Swiss-Prot;Acc:Q3TBW2]	-0.488896	-0.65571	-0.322082	7.54855e-07	4.64612e-06	-0.0401822	-0.178485	0.0981205	0.559675	0.803875	-0.63603	-0.817381	-0.45468	2.02067e-08	2.52088e-07	0.0263308	-0.10366	0.156322	0.683884	0.988924	-0.543265	-0.686933	-0.399598	3.73252e-09	4.43904e-08	0.0389569	-0.10847	0.186384	0.595594	0.915084	-0.0664344	-0.257826	0.124957	0.486288	0.719463	0.229464	0.0598015	0.399126	0.00938787	0.0432575	0.106952	-0.0969775	0.310881
ENSMUSG00000001467	13121	Cyp51	protein_coding	MGI Symbol	4	Lanosterol 14-alpha demethylase [Source:UniProtKB/Swiss-Prot;Acc:Q8K0C4]	-0.59314	-1.12605	-0.0602332	0.0301215	0.0518197	1.99245	1.54143	2.44347	8.40821e-11	1.55996e-07	1.13718	0.549167	1.72519	0.000369555	0.00118856	-0.247378	-0.695538	0.200782	0.270616	0.967913	1.41662	0.945686	1.88756	4.62961e-07	2.7952e-06	1.25417	0.767887	1.74045	6.97046e-06	0.00164592	-0.526824	-1.13238	0.0787279	0.0862041	0.286399	-0.863947	-1.41668	-0.311213	0.00307921	0.0197285	0.262129	-0.390811	0.915069
ENSMUSG00000001472	66855	Tcf25	protein_coding	MGI Symbol	11	Transcription factor 25 [Source:UniProtKB/Swiss-Prot;Acc:Q8R3L2]	-0.466656	-0.592653	-0.340658	6.00602e-09	7.55816e-08	-0.0915501	-0.193143	0.0100428	0.0759484	0.326439	-0.567626	-0.701006	-0.434245	2.16802e-10	6.31302e-09	0.0209928	-0.0744958	0.116481	0.658613	0.988678	-0.398019	-0.504887	-0.291151	5.29025e-09	5.94966e-08	0.0651244	-0.0433872	0.173636	0.231692	0.702829	-0.148614	-0.290364	-0.00686386	0.0403894	0.188682	0.0523189	-0.0749555	0.179593	0.410268	0.587013	0.0094199	-0.143369	0.162209
ENSMUSG00000001473	67951	Tubb6	protein_coding	MGI Symbol	1	tubulin, beta 6 class V [Source:MGI Symbol;Acc:MGI:1915201]	-1.14357	-1.54957	-0.737573	1.55387e-06	8.72087e-06	-0.172748	-0.562739	0.217244	0.375279	0.685934	-1.2752	-1.74101	-0.809385	2.56331e-06	1.55399e-05	0.244816	-0.117772	0.607404	0.17956	0.93701	-1.06063	-1.41477	-0.706503	5.0281e-07	3.00207e-06	0.0255787	-0.372974	0.424132	0.897248	0.983847	0.0302501	-0.429011	0.489512	0.894561	0.95794	0.0587655	-0.329322	0.446853	0.760723	0.857174	-0.0411183	-0.520412	0.438176
ENSMUSG00000001482	23854	Def8	protein_coding	MGI Symbol	11	Differentially expressed in FDCP 8 [Source:UniProtKB/Swiss-Prot;Acc:Q99J78]	-0.359037	-0.514835	-0.203238	3.88414e-05	0.000145161	0.180626	0.0522726	0.308979	0.00707653	0.0929182	-0.200553	-0.369463	-0.0316431	0.0212479	0.0410329	-0.109641	-0.23032	0.0110376	0.0736736	0.851547	-0.493332	-0.627526	-0.359138	7.10853e-09	7.66128e-08	-0.0657873	-0.202807	0.0712322	0.336978	0.781767	0.183138	0.00432198	0.361954	0.044978	0.200182	0.311392	0.152725	0.470058	0.000311763	0.00388197	0.0221421	-0.16846	0.212744
ENSMUSG00000001506	12842	Col1a1	protein_coding	MGI Symbol	4	Collagen alpha-1(I) chain [Source:UniProtKB/Swiss-Prot;Acc:P11087]	0.00986699	-0.824428	0.844162	0.981012	0.986328	-0.0927398	-0.827643	0.642164	0.799619	0.920136	-0.281662	-1.29368	0.730361	0.576236	0.657434	0.0453236	-0.644531	0.735178	0.894827	0.998135	-0.971563	-1.65499	-0.288137	0.00656568	0.0131729	-0.0980644	-0.860672	0.664543	0.795898	0.963938	0.735225	-0.272427	1.74288	0.147779	0.381079	-0.0693238	-0.803685	0.665037	0.849368	0.914071	0.198789	-0.88756	1.28514
ENSMUSG00000001507	16400	Itga3	protein_coding	MGI Symbol	6	Integrin alpha-3 Integrin alpha-3 heavy chain Integrin alpha-3 light chain [Source:UniProtKB/Swiss-Prot;Acc:Q62470]	-0.784086	-0.973137	-0.595036	4.11141e-10	8.35601e-09	-0.0171566	-0.189583	0.15527	0.841338	0.939587	-0.601861	-0.825001	-0.378721	3.30779e-06	1.9368e-05	0.0115133	-0.14982	0.172847	0.885823	0.99766	-0.392211	-0.563532	-0.22089	4.26662e-05	0.000150294	-0.0999991	-0.279444	0.0794453	0.266131	0.735127	-0.198137	-0.428601	0.0323278	0.0898274	0.292892	-0.413848	-0.604442	-0.223255	8.82323e-05	0.00162714	-0.199382	-0.435603	0.0368398
ENSMUSG00000001517	14235	Foxm1	protein_coding	MGI Symbol	8	forkhead box M1 [Source:HGNC Symbol;Acc:HGNC:3818]	-0.849369	-1.64982	-0.0489164	0.0381573	0.0637608	0.0359152	-0.73779	0.809621	0.925578	0.974443	-0.786266	-1.75046	0.177931	0.106948	0.164157	-0.019158	-0.740882	0.702565	0.957399	0.998763	-0.227726	-1.00305	0.547594	0.555405	0.623842	-0.684681	-1.42858	0.0592176	0.070145	0.442435	-0.577698	-1.58264	0.427246	0.25159	0.511228	-0.264911	-1.13149	0.60167	0.539474	0.696152	-0.0271872	-1.01298	0.958602
ENSMUSG00000001518	101142	Itfg2	protein_coding	MGI Symbol	10	KICSTOR complex protein ITFG2 [Source:UniProtKB/Swiss-Prot;Acc:Q91WI7]	-0.300315	-0.457552	-0.143078	0.00042593	0.00119757	-0.124313	-0.263689	0.0150626	0.0788692	0.331802	-0.413319	-0.600965	-0.225673	7.28291e-05	0.000286442	-0.0293725	-0.161868	0.103123	0.655945	0.988678	-0.413138	-0.554187	-0.27209	7.63199e-07	4.30007e-06	0.0152072	-0.134737	0.165151	0.838323	0.971569	-0.0295532	-0.223333	0.164226	0.759062	0.891717	0.180156	0.0146936	0.345619	0.0336613	0.106652	-0.0113093	-0.212578	0.189959
ENSMUSG00000001520	60345	Nrip2	protein_coding	MGI Symbol	6	Nuclear receptor-interacting protein 2 [Source:UniProtKB/Swiss-Prot;Acc:Q9JHR9]	-0.190603	-0.744119	0.362914	0.489744	0.569307	-0.639854	-1.1717	-0.108009	0.019703	0.157564	-0.923833	-1.62799	-0.219678	0.0115277	0.024221	0.518478	0.0103706	1.02659	0.0457289	0.811479	-0.153231	-0.662349	0.355886	0.545727	0.615222	0.738303	0.139109	1.3375	0.0171158	0.21451	-0.252123	-0.957006	0.452761	0.473205	0.710365	-0.183987	-0.768367	0.400392	0.527474	0.686679	0.0933756	-0.627287	0.814038
ENSMUSG00000001521	22158	Tulp3	protein_coding	MGI Symbol	6	tubby-like protein 3 [Source:MGI Symbol;Acc:MGI:1329045]	-0.205023	-0.624942	0.214896	0.328979	0.409435	0.321934	-0.0427574	0.686626	0.0818685	0.337907	0.662206	0.0919391	1.23247	0.0240536	0.0456969	0.0968123	-0.223008	0.416633	0.543427	0.983698	0.434718	0.0642275	0.805209	0.0227105	0.0391429	0.18765	-0.177813	0.553113	0.304947	0.759861	0.3243	-0.275852	0.924452	0.28067	0.541916	-0.0853302	-0.54197	0.37131	0.707149	0.823802	-0.545295	-1.15237	0.0617769
ENSMUSG00000001524	14885	Gtf2h4	protein_coding	MGI Symbol	12	general transcription factor II H, polypeptide 4 [Source:MGI Symbol;Acc:MGI:1338799]	-0.313532	-0.495533	-0.13153	0.00126279	0.00316051	0.141164	-0.0176816	0.30001	0.0799184	0.3344	-0.122548	-0.339708	0.0946111	0.260228	0.344784	-0.023771	-0.170405	0.122863	0.744427	0.990955	-0.133227	-0.293431	0.0269765	0.100413	0.145461	0.00807995	-0.157619	0.173779	0.921834	0.988043	-0.0130923	-0.239636	0.213451	0.907423	0.963425	0.0361019	-0.153229	0.225433	0.701465	0.820196	-0.049819	-0.284448	0.18481
ENSMUSG00000001525	22154	Tubb5	protein_coding	MGI Symbol	4	tubulin, beta 5 class I [Source:MGI Symbol;Acc:MGI:107812]	-0.82335	-1.06667	-0.580033	4.35591e-08	3.98381e-07	-0.309071	-0.50285	-0.115292	0.00258407	0.0549253	-0.971468	-1.22786	-0.715074	3.56412e-09	6.09043e-08	-0.11306	-0.29403	0.0679104	0.2135	0.950593	-0.845287	-1.04893	-0.641647	4.02945e-10	6.83571e-09	-0.168628	-0.374626	0.0373708	0.105656	0.527516	-0.23924	-0.512108	0.0336278	0.083881	0.281645	-0.117579	-0.36277	0.127613	0.337567	0.515884	-0.160954	-0.456572	0.134665
ENSMUSG00000001542	192657	Ell2	protein_coding	MGI Symbol	9	RNA polymerase II elongation factor ELL2 [Source:UniProtKB/Swiss-Prot;Acc:Q3UKU1]	0.805659	0.621717	0.989602	1.04707e-10	2.82124e-09	0.032971	-0.12198	0.187922	0.66889	0.861384	0.766589	0.570841	0.962337	1.64514e-09	3.22741e-08	-0.137649	-0.2832	0.00790271	0.0630942	0.832028	0.75467	0.59726	0.912081	9.79637e-12	3.13363e-10	0.0887212	-0.0758264	0.253269	0.281706	0.747398	-0.12573	-0.330449	0.0789893	0.221197	0.477032	-0.319941	-0.5043	-0.135582	0.00117434	0.00995502	0.0720413	-0.147372	0.291454
ENSMUSG00000001552	16480	Jup	protein_coding	MGI Symbol	9	Junction plakoglobin [Source:UniProtKB/Swiss-Prot;Acc:Q02257]	-0.788456	-0.983213	-0.593699	7.4246e-10	1.34294e-08	0.139502	-0.0178753	0.296878	0.0806602	0.335963	-0.696216	-0.904197	-0.488235	5.46778e-08	5.80622e-07	-0.0608426	-0.209093	0.0874073	0.411019	0.983698	-0.656463	-0.822594	-0.490333	1.32942e-09	1.87408e-08	0.0540523	-0.114199	0.222304	0.519139	0.887982	-0.100595	-0.321677	0.120487	0.362559	0.619988	0.238783	0.0415579	0.436007	0.0189918	0.0711	0.0472611	-0.190266	0.284788
ENSMUSG00000001555	14230	Fkbp10	protein_coding	MGI Symbol	5	Peptidyl-prolyl cis-trans isomerase FKBP10 [Source:UniProtKB/Swiss-Prot;Acc:Q61576]	-0.388012	-0.93223	0.156206	0.156996	0.218088	-0.084183	-0.591926	0.42356	0.738832	0.895231	-0.638529	-1.29224	0.0151803	0.0552789	0.0936604	-0.106573	-0.591594	0.378448	0.658782	0.988678	-0.711333	-1.19871	-0.223957	0.00537726	0.0110045	0.00139129	-0.551239	0.554022	0.995958	0.998923	-0.0337693	-0.689229	0.62169	0.91743	0.967178	0.173637	-0.376797	0.724072	0.526676	0.686327	0.166335	-0.516092	0.848761
ENSMUSG00000001569	433864	Nom1	protein_coding	MGI Symbol	2	Nucleolar MIF4G domain-containing protein 1 [Source:UniProtKB/Swiss-Prot;Acc:Q3UFM5]	0.279911	0.142052	0.417771	0.00020766	0.000637712	-0.138799	-0.253378	-0.0242201	0.0189304	0.154171	0.051786	-0.106774	0.210346	0.512254	0.598582	0.0489582	-0.0589751	0.156891	0.364037	0.983698	0.298954	0.177175	0.420734	1.52107e-05	5.9626e-05	-0.0392182	-0.160974	0.0825373	0.518045	0.887706	-0.19821	-0.366501	-0.0299192	0.022238	0.135794	-0.142407	-0.287023	0.00220859	0.0534197	0.146174	0.0893265	-0.0867933	0.265446
ENSMUSG00000001576	67458	Ergic1	protein_coding	MGI Symbol	7	Endoplasmic reticulum-Golgi intermediate compartment protein 1 [Source:UniProtKB/Swiss-Prot;Acc:Q9DC16]	-0.561879	-0.756075	-0.367682	9.56626e-07	5.69346e-06	0.0125635	-0.143823	0.16895	0.871589	0.952164	-0.598546	-0.804861	-0.392232	9.1068e-07	6.29766e-06	-0.101149	-0.24811	0.045812	0.171479	0.93701	-0.482154	-0.646585	-0.317723	7.4791e-07	4.2286e-06	-0.122858	-0.290312	0.0445967	0.145613	0.591935	-0.217541	-0.436644	0.00156106	0.0515709	0.216468	-0.0290123	-0.225707	0.167683	0.766734	0.860268	0.0492312	-0.187034	0.285497
ENSMUSG00000001588	216859	Acap1	protein_coding	MGI Symbol	4	ArfGAP with coiled-coil, ankyrin repeat and PH domains 1 [Source:MGI Symbol;Acc:MGI:2388270]	-0.199423	-0.483817	0.0849703	0.16376	0.225913	-0.0280439	-0.284237	0.228149	0.825705	0.931902	-0.27806	-0.629107	0.0729879	0.117024	0.177112	0.0162867	-0.223455	0.256029	0.891273	0.997882	-0.114889	-0.371892	0.142114	0.370943	0.445317	0.00537439	-0.263672	0.274421	0.967935	0.993948	-0.146884	-0.509939	0.21617	0.417634	0.666718	0.240123	-0.0754229	0.555669	0.131623	0.274205	0.0505924	-0.321536	0.42272
ENSMUSG00000001604	21401	Tcea3	protein_coding	MGI Symbol	3	Transcription elongation factor A protein 3 [Source:UniProtKB/Swiss-Prot;Acc:P23881]	0.0887549	-0.144532	0.322042	0.445705	0.526806	-0.0239305	-0.215911	0.16805	0.802016	0.921098	-0.381725	-0.632796	-0.130654	0.00388247	0.00938251	0.00363258	-0.177081	0.184346	0.967733	0.998763	0.309529	0.11065	0.508407	0.00319345	0.00694579	0.0930205	-0.112052	0.298093	0.364036	0.799197	-0.687621	-0.952068	-0.423175	6.10157e-06	0.00173743	-0.148738	-0.383143	0.0856659	0.206557	0.374241	0.446549	0.162643	0.730455
ENSMUSG00000001627	15982	Ifrd1	protein_coding	MGI Symbol	10	Interferon-related developmental regulator 1 [Source:UniProtKB/Swiss-Prot;Acc:P19182]	0.826624	0.431983	1.22127	0.00014087	0.000451388	-0.166857	-0.480533	0.146819	0.288118	0.612351	1.05462	0.502243	1.607	0.000427721	0.00135481	-0.0448204	-0.344371	0.25473	0.763475	0.990955	0.925772	0.554406	1.29714	1.19863e-05	4.81046e-05	-0.126985	-0.461511	0.20754	0.446722	0.852756	0.0840286	-0.510364	0.678422	0.776154	0.899075	-0.392352	-0.845602	0.0608982	0.0877243	0.206428	-0.394854	-0.996909	0.2072
ENSMUSG00000001630	232533	Stk38l	protein_coding	MGI Symbol	3	Mus musculus serine/threonine kinase 38 like (Stk38l), transcript variant 2, mRNA. [Source:RefSeq mRNA;Acc:NM_001346666]	0.313692	-0.0125484	0.639933	0.0590009	0.0933421	0.213788	-0.0523221	0.479898	0.112062	0.390683	0.849731	0.420763	1.2787	0.00027948	0.000925918	0.021608	-0.22162	0.264836	0.858142	0.996139	0.585789	0.298776	0.872801	0.000194847	0.000573675	0.271953	-0.00982833	0.553734	0.0581067	0.406811	0.28555	-0.169675	0.740775	0.21169	0.465258	-0.0541924	-0.408324	0.299939	0.758267	0.856463	-0.322251	-0.7909	0.146399
ENSMUSG00000001632	78783	Brpf1	protein_coding	MGI Symbol	10	Peregrin [Source:UniProtKB/Swiss-Prot;Acc:B2RRD7]	-0.239946	-0.448603	-0.0312895	0.0253638	0.0445978	-0.151685	-0.329285	0.0259161	0.0918765	0.355961	-0.430848	-0.667692	-0.194004	0.000725166	0.00214919	0.110173	-0.0569163	0.277263	0.189725	0.940379	-0.0416678	-0.226057	0.142722	0.649744	0.709392	0.113225	-0.0758543	0.302304	0.232714	0.703062	-0.279007	-0.528357	-0.0296569	0.0293101	0.157034	0.061008	-0.157934	0.27995	0.575781	0.726905	0.0392171	-0.221725	0.300159
ENSMUSG00000001642	11677	Akr1b3	protein_coding	MGI Symbol	6	Aldose reductase [Source:UniProtKB/Swiss-Prot;Acc:P45376]	-0.314093	-0.669563	0.0413772	0.0815894	0.12366	0.231941	-0.0838048	0.547686	0.145132	0.443281	0.523314	0.0413231	1.0053	0.0341352	0.0617686	0.418368	0.146935	0.689801	0.00346606	0.506422	0.46818	0.167244	0.769115	0.00320439	0.00696625	0.226619	-0.0727341	0.525971	0.133577	0.577773	0.473503	-0.0256985	0.972704	0.0623488	0.238856	0.0317566	-0.346722	0.410235	0.865938	0.923919	-0.605466	-1.11437	-0.0965664
ENSMUSG00000001663	14871	Gstt1	protein_coding	MGI Symbol	3	Glutathione S-transferase theta-1 [Source:UniProtKB/Swiss-Prot;Acc:Q64471]	-0.658157	-0.990347	-0.325967	0.000278824	0.000828812	-0.12561	-0.391263	0.140044	0.344284	0.663016	-1.25887	-1.6176	-0.900149	1.99441e-08	2.49531e-07	0.130017	-0.12021	0.380245	0.299284	0.97334	-1.31911	-1.60905	-1.02916	3.92863e-11	9.9263e-10	-0.0992566	-0.385991	0.187478	0.487475	0.872945	0.190249	-0.197228	0.577727	0.326297	0.587987	0.0506476	-0.302199	0.403494	0.772814	0.864431	0.475108	0.0646662	0.885549
ENSMUSG00000001665	103140	Gstt3	protein_coding	MGI Symbol	6	Mus musculus glutathione S-transferase, theta 3 (Gstt3), transcript variant 2, mRNA. [Source:RefSeq mRNA;Acc:NM_001346523]	-0.578307	-1.17496	0.0183431	0.0570894	0.0907492	-0.196049	-0.700094	0.307996	0.435693	0.731619	-0.559393	-1.22455	0.10576	0.096769	0.150978	0.0494062	-0.42646	0.525273	0.834548	0.992883	-1.58558	-2.10485	-1.06631	3.47546e-07	2.18153e-06	-0.772141	-1.30043	-0.243851	0.00531857	0.112863	1.07559	0.378726	1.77246	0.00342595	0.0450332	-0.0940008	-0.705923	0.517921	0.757371	0.855972	-0.214963	-0.95277	0.522844
ENSMUSG00000001666	13202	Ddt	protein_coding	MGI Symbol	2	D-dopachrome decarboxylase [Source:UniProtKB/Swiss-Prot;Acc:O35215]	-0.00480957	-0.288207	0.278588	0.972756	0.979772	0.011372	-0.221182	0.243926	0.921614	0.972462	0.000669197	-0.299402	0.300741	0.996419	0.997802	0.0727003	-0.146933	0.292333	0.506613	0.983698	-0.0555563	-0.299124	0.188012	0.646694	0.706717	-0.00543817	-0.255912	0.245036	0.96515	0.993948	0.128926	-0.189083	0.446935	0.41668	0.665857	0.302758	0.0172781	0.588238	0.0382583	0.116388	0.00589321	-0.335099	0.346885
ENSMUSG00000001670	234724	Tat	protein_coding	MGI Symbol	2	tyrosine aminotransferase [Source:MGI Symbol;Acc:MGI:98487]	-0.357457	-0.809034	0.0941201	0.117253	0.169459	0.00198384	-0.36492	0.368888	0.991318	0.997308	0.658098	0.198977	1.11722	0.00617232	0.0140829	-0.0677173	-0.412721	0.277286	0.693156	0.989332	0.307033	-0.0695006	0.683566	0.106965	0.154008	-0.0604899	-0.453183	0.332203	0.756725	0.956639	0.283348	-0.199914	0.76661	0.242423	0.500796	-0.246563	-0.691928	0.198802	0.269224	0.444837	-1.01357	-1.54281	-0.48433
ENSMUSG00000001672	73608	Marveld3	protein_coding	MGI Symbol	3	MARVEL domain containing 3 [Source:HGNC Symbol;Acc:HGNC:30525]	-0.376191	-0.984414	0.232031	0.218008	0.288941	-0.0149844	-0.577431	0.547462	0.957244	0.985784	0.366276	-0.506085	1.23864	0.400418	0.490727	0.185992	-0.328136	0.70012	0.468206	0.983698	1.13894	0.487267	1.79061	0.00109467	0.00268033	-0.0961588	-0.652317	0.459999	0.7281	0.948111	-0.586672	-1.54655	0.373204	0.223388	0.479584	-0.786004	-1.56136	-0.0106448	0.0470905	0.134203	-0.757451	-1.66	0.145101
ENSMUSG00000001674	66942	Ddx18	protein_coding	MGI Symbol	4	ATP-dependent RNA helicase DDX18 [Source:UniProtKB/Swiss-Prot;Acc:Q8K363]	-0.0936713	-0.304266	0.116924	0.373319	0.455796	0.128451	-0.0543715	0.311274	0.162955	0.470812	0.100654	-0.162932	0.36424	0.444036	0.533805	-0.123471	-0.293912	0.0469696	0.150617	0.930714	0.0109725	-0.178348	0.200294	0.907159	0.926181	-0.151093	-0.341427	0.0392399	0.116244	0.547814	-0.0337903	-0.30996	0.24238	0.805588	0.914561	0.232562	-0.00153286	0.466657	0.0514421	0.142721	-0.0658738	-0.349429	0.217682
ENSMUSG00000001687	24109	Ubl3	protein_coding	MGI Symbol	7	ubiquitin-like 3 [Source:MGI Symbol;Acc:MGI:1344373]	0.209759	0.0648937	0.354625	0.00571627	0.0120986	-0.0942233	-0.213843	0.0253967	0.119004	0.402056	0.27175	0.114133	0.429366	0.00125253	0.0034922	-0.0343563	-0.146751	0.0780384	0.539503	0.983698	0.0453077	-0.0793009	0.169916	0.465964	0.539732	0.0520966	-0.0754991	0.179692	0.413409	0.829863	0.192086	0.0255395	0.358632	0.0249628	0.142845	0.347717	0.200557	0.494877	2.70277e-05	0.000729747	-0.156214	-0.333753	0.0213249
ENSMUSG00000001700	107022	Gramd3	protein_coding	MGI Symbol	1	GRAM domain containing 2B [Source:HGNC Symbol;Acc:HGNC:24911]	0.272713	0.012597	0.532829	0.0403883	0.0670574	0.00281564	-0.21232	0.217951	0.978988	0.99273	0.385194	0.0930895	0.677299	0.0111445	0.0235262	0.111142	-0.0911169	0.313401	0.272742	0.968937	0.426182	0.200261	0.652102	0.000489294	0.00130941	0.0956548	-0.133872	0.325182	0.403894	0.82431	0.0701543	-0.238806	0.379115	0.648175	0.827305	-0.314097	-0.580906	-0.0472866	0.0222966	0.0797262	-0.109665	-0.436318	0.216988
ENSMUSG00000001707	66143	Eef1e1	protein_coding	MGI Symbol	3	Eukaryotic translation elongation factor 1 epsilon-1 [Source:UniProtKB/Swiss-Prot;Acc:Q9D1M4]	-0.272239	-0.498297	-0.0461803	0.0195895	0.0355269	-0.0150644	-0.218289	0.18816	0.881435	0.95534	-0.177582	-0.460333	0.105169	0.211136	0.290315	-0.0269425	-0.217866	0.163981	0.776542	0.990955	-0.160028	-0.365502	0.0454459	0.123078	0.173816	0.0253223	-0.190779	0.241424	0.81365	0.967269	-0.0444964	-0.337269	0.248276	0.759867	0.892351	-0.100681	-0.338386	0.137024	0.396333	0.57308	-0.109721	-0.409305	0.189862
ENSMUSG00000001729	11651	Akt1	protein_coding	MGI Symbol	9	Mus musculus thymoma viral proto-onco 1 (Akt1), transcript variant 3, mRNA. [Source:RefSeq mRNA;Acc:NM_001331107]	-0.38681	-0.54262	-0.230999	1.27877e-05	5.481e-05	-0.0938653	-0.22102	0.033289	0.143217	0.440748	-0.405269	-0.572074	-0.238463	1.78205e-05	8.38226e-05	0.0963779	-0.0232841	0.21604	0.111186	0.916025	-0.0733786	-0.206259	0.0595015	0.270419	0.341097	0.0212768	-0.114742	0.157295	0.753081	0.955664	-0.235512	-0.412041	-0.0589837	0.0103068	0.0871445	0.124419	-0.0325465	0.281384	0.116771	0.253427	-0.0754066	-0.264966	0.114153
ENSMUSG00000001741	16170	Il16	protein_coding	MGI Symbol	6	Pro-interleukin-16 Interleukin-16 [Source:UniProtKB/Swiss-Prot;Acc:O54824]	0.0516286	-0.228176	0.331433	0.710657	0.770007	0.237825	0.00169851	0.473951	0.0484566	0.25908	0.266989	-0.0818816	0.61586	0.129513	0.192865	-0.334655	-0.557437	-0.111873	0.00428286	0.535967	-0.216229	-0.462082	0.0296245	0.0829556	0.123097	-0.0418235	-0.300773	0.217126	0.745337	0.952467	0.148563	-0.215474	0.5126	0.41363	0.663597	0.280973	-0.018315	0.58026	0.0649534	0.167569	0.0224641	-0.357333	0.402261
ENSMUSG00000001750	27060	Tcirg1	protein_coding	MGI Symbol	13	T cell, immune regulator 1, ATPase, H+ transporting, lysosomal V0 protein A3 [Source:MGI Symbol;Acc:MGI:1350931]	-0.711429	-0.889822	-0.533036	1.06706e-09	1.80207e-08	0.0219268	-0.123921	0.167775	0.76238	0.904948	-0.486544	-0.678189	-0.2949	8.98326e-06	4.56617e-05	-0.0225336	-0.159685	0.114618	0.741109	0.990955	-0.326565	-0.478794	-0.174336	0.000103523	0.00032904	-0.0536234	-0.209304	0.102057	0.489623	0.872945	-0.182513	-0.385221	0.0201947	0.0761893	0.266488	0.206899	0.0268797	0.386918	0.0254402	0.0878702	-0.202958	-0.420397	0.0144818
ENSMUSG00000001751	27419	Naglu	protein_coding	MGI Symbol	3	alpha-N-acetylglucosaminidase (Sanfilippo disease IIIB) [Source:MGI Symbol;Acc:MGI:1351641]	-0.241524	-0.38948	-0.0935689	0.00209967	0.0049597	-0.0157011	-0.13956	0.108157	0.798729	0.919682	-0.0290065	-0.196643	0.13863	0.727898	0.788753	-0.0431898	-0.159696	0.0733164	0.457356	0.983698	-0.0140826	-0.143743	0.115578	0.82704	0.861744	-0.0564209	-0.188279	0.0754373	0.391564	0.818474	-0.0581137	-0.235145	0.118917	0.510117	0.735282	-0.157552	-0.310271	-0.00483181	0.0435185	0.127177	-0.228219	-0.414369	-0.042069
ENSMUSG00000001755	71743	Ppat	protein_coding	MGI Symbol	4	Coenzyme A synthase [Source:MGI Symbol;Acc:MGI:1918993]	0.0900625	-0.0935136	0.273639	0.326681	0.40716	-0.116537	-0.267216	0.0341417	0.125619	0.413015	0.0306157	-0.162887	0.224118	0.750349	0.807149	0.0565098	-0.0851445	0.198164	0.42411	0.983698	-0.241593	-0.399519	-0.0836667	0.00369006	0.00789113	0.028622	-0.132665	0.189909	0.721234	0.946444	0.328718	0.123005	0.534431	0.00254193	0.0380761	0.25464	0.0684756	0.440805	0.00867795	0.0409969	-0.0570905	-0.27718	0.162999
ENSMUSG00000001761	319757	Smo	protein_coding	MGI Symbol	2	smoothened, frizzled class receptor [Source:MGI Symbol;Acc:MGI:108075]	-0.463098	-0.783307	-0.142889	0.00576845	0.0121912	0.702334	0.425133	0.979536	9.27771e-06	0.0017162	0.158684	-0.212455	0.529824	0.391926	0.482139	-0.0863588	-0.323002	0.150284	0.464343	0.983698	-0.186123	-0.443713	0.071467	0.151643	0.208049	0.069484	-0.201744	0.340712	0.606824	0.918086	0.258448	-0.126385	0.643282	0.181838	0.430119	-0.0907825	-0.388434	0.206868	0.540399	0.696589	0.0805519	-0.323722	0.484826
ENSMUSG00000001763	232670	Tspan33	protein_coding	MGI Symbol	3	Tetraspanin-33 [Source:UniProtKB/Swiss-Prot;Acc:Q8R3S2]	-0.476484	-0.788682	-0.164286	0.00376188	0.00831724	0.297878	0.0279295	0.567826	0.0314774	0.203685	-0.733634	-1.06954	-0.397731	8.16262e-05	0.00031663	-0.0563992	-0.303025	0.190227	0.645847	0.988678	-0.380636	-0.647562	-0.11371	0.00641642	0.0129074	0.484972	0.19047	0.779474	0.00193821	0.0650428	-0.409397	-0.760474	-0.0583193	0.0235036	0.138683	0.696851	0.365715	1.02799	0.000132731	0.00214667	0.555027	0.184317	0.925737
ENSMUSG00000001767	66877	Crnkl1	protein_coding	MGI Symbol	3	Crooked neck-like protein 1 [Source:UniProtKB/Swiss-Prot;Acc:P63154]	0.618452	0.443051	0.793853	1.79887e-08	1.89166e-07	-0.016573	-0.157238	0.124092	0.812651	0.925763	0.77253	0.545526	0.999534	3.86153e-08	4.3843e-07	-0.00765723	-0.13964	0.124326	0.907064	0.998135	0.595735	0.439892	0.751578	2.90239e-09	3.57622e-08	-0.0946538	-0.242258	0.0529506	0.201888	0.669357	0.169138	-0.0725189	0.410796	0.164529	0.405753	0.044772	-0.149813	0.239357	0.643825	0.780515	-0.170651	-0.420671	0.0793682
ENSMUSG00000001768	74030	Rin2	protein_coding	MGI Symbol	8	Ras and Rab interactor 2 [Source:MGI Symbol;Acc:MGI:1921280]	0.282738	0.0554248	0.510051	0.0161681	0.0301127	0.06302	-0.125142	0.251182	0.501628	0.769779	0.283062	0.00809662	0.558028	0.0439426	0.0766943	0.0234981	-0.151387	0.198383	0.786962	0.992038	0.563369	0.358506	0.768233	2.36998e-06	1.15754e-05	-0.0837447	-0.279311	0.111821	0.391206	0.818395	-0.256809	-0.55175	0.0381329	0.0859543	0.285945	-0.214561	-0.461681	0.0325585	0.0868103	0.204722	0.0626956	-0.240409	0.365801
ENSMUSG00000001774	66917	Chordc1	protein_coding	MGI Symbol	9	Cysteine and histidine-rich domain-containing protein 1 [Source:UniProtKB/Swiss-Prot;Acc:Q9D1P4]	0.889531	0.623333	1.15573	5.67295e-08	5.01188e-07	-0.413669	-0.63198	-0.195358	0.000465579	0.0199937	0.262196	-0.0410457	0.565439	0.088076	0.139442	2.84149e-06	-0.206422	0.206428	0.999978	0.999978	0.314942	0.0825907	0.547294	0.00924584	0.0178472	-0.0530754	-0.286681	0.18053	0.64798	0.93079	-0.052743	-0.374196	0.26871	0.741442	0.881919	0.0553626	-0.222513	0.333238	0.688786	0.811729	0.213665	-0.125684	0.553014
ENSMUSG00000001783	28088	Rtcb	protein_coding	MGI Symbol	2	tRNA-splicing ligase RtcB homolog [Source:UniProtKB/Swiss-Prot;Acc:Q99LF4]	-0.178424	-0.343291	-0.0135578	0.0346827	0.0587255	-0.0159257	-0.151409	0.119558	0.813074	0.926008	-0.248635	-0.426502	-0.0707673	0.00743073	0.0165699	0.0114958	-0.115974	0.138965	0.856017	0.996139	-0.248455	-0.390145	-0.106765	0.00105893	0.00259722	-0.0145915	-0.159423	0.13024	0.839379	0.97235	0.0113158	-0.177004	0.199636	0.903763	0.96223	0.0871777	-0.0805125	0.254868	0.29903	0.476558	0.0542848	-0.146867	0.255437
ENSMUSG00000001785	103136	Pwp1	protein_coding	MGI Symbol	5	Periodic tryptophan [Source:UniProtKB/Swiss-Prot;Acc:Q99LL5]	0.0535741	-0.11145	0.218598	0.514771	0.592986	-0.0341683	-0.174478	0.106142	0.624656	0.840577	0.112766	-0.0891728	0.314704	0.265166	0.350362	0.0517254	-0.0794972	0.182948	0.429598	0.983698	0.117041	-0.0294468	0.263528	0.113974	0.162515	0.0484392	-0.0995874	0.196466	0.511444	0.885022	0.0474506	-0.164725	0.259626	0.65312	0.830145	0.0432616	-0.133011	0.219534	0.621961	0.764316	-0.09336	-0.31319	0.12647
ENSMUSG00000001786	69754	Fbxo7	protein_coding	MGI Symbol	7	Mus musculus F-box protein 7 (Fbxo7), transcript variant 3, mRNA. [Source:RefSeq mRNA;Acc:NM_001347151]	-0.286032	-0.445809	-0.126255	0.000857453	0.00223834	0.0225479	-0.11433	0.159426	0.740451	0.895264	-0.15357	-0.340414	0.0332738	0.104295	0.160902	-0.0317577	-0.160035	0.0965201	0.618928	0.98603	-0.130816	-0.272359	0.0107266	0.0690392	0.104829	-0.025544	-0.170349	0.119261	0.722822	0.947076	-0.0545119	-0.2507	0.141676	0.576865	0.781357	0.225153	0.0552639	0.395043	0.0107787	0.0474358	-0.109914	-0.314129	0.0943013
ENSMUSG00000001794	12336	Capns1	protein_coding	MGI Symbol	8	calpain small subunit 1 [Source:HGNC Symbol;Acc:HGNC:1481]	-0.909489	-1.1179	-0.701081	1.14934e-10	3.03382e-09	-0.17209	-0.33721	-0.00696928	0.0415242	0.238423	-1.34972	-1.57346	-1.12598	1.41712e-14	6.1347e-12	0.0212439	-0.133536	0.176024	0.782499	0.991349	-1.01656	-1.19349	-0.839615	6.01552e-14	5.31453e-12	-0.0767935	-0.2535	0.0999133	0.384275	0.812819	-0.311923	-0.551527	-0.072319	0.0121303	0.0963801	-0.274509	-0.49058	-0.0584377	0.0141817	0.0576457	0.268144	0.0107947	0.525492
ENSMUSG00000001802	435965	Lrp3	protein_coding	MGI Symbol	4	LDL receptor related protein 3 [Source:HGNC Symbol;Acc:HGNC:6695]	-0.194765	-0.413063	0.023534	0.0787838	0.119977	0.083553	-0.100249	0.267355	0.363009	0.677062	-0.368464	-0.611166	-0.125762	0.00392909	0.0094793	-0.0623247	-0.234485	0.109836	0.467896	0.983698	-0.387394	-0.576187	-0.198602	0.000182371	0.000541609	0.0505753	-0.145215	0.246365	0.603845	0.917424	-0.0433946	-0.298164	0.211375	0.731977	0.878738	0.460416	0.234495	0.686338	0.000198444	0.00284942	0.257252	-0.0125166	0.527022
ENSMUSG00000001829	20480	Clpb	protein_coding	MGI Symbol	11	Caseinolytic peptidase B protein homolog [Source:UniProtKB/Swiss-Prot;Acc:Q60649]	-0.636806	-0.831481	-0.442131	8.82436e-08	7.34628e-07	-0.0279921	-0.187528	0.131544	0.724242	0.889094	-0.605921	-0.815469	-0.396374	9.67491e-07	6.64453e-06	-0.0370264	-0.18707	0.113017	0.620057	0.98603	-0.804103	-0.971247	-0.636958	8.92842e-12	2.92074e-10	0.0316142	-0.138717	0.201946	0.709033	0.945719	0.161155	-0.0609583	0.383268	0.149999	0.3852	0.478365	0.280893	0.675838	1.86352e-05	0.000583657	-0.0588767	-0.296273	0.178519
ENSMUSG00000001833	235072	2019-09-07	protein_coding	MGI Symbol	10	septin-7 isoform 2 [Source:RefSeq peptide;Acc:NP_001192296]	0.807826	0.620204	0.995449	1.61707e-10	3.95705e-09	-0.0259757	-0.180527	0.128575	0.735389	0.893823	0.841019	0.627467	1.05457	1.4401e-09	2.88175e-08	0.0139578	-0.131433	0.159348	0.846845	0.994382	0.842073	0.678246	1.0059	1.45425e-12	6.60363e-11	0.00451268	-0.160607	0.169632	0.95614	0.993948	0.0129043	-0.213602	0.239411	0.908732	0.963497	-0.506789	-0.699854	-0.313725	5.22012e-06	0.000270041	-0.0591686	-0.297749	0.179412
ENSMUSG00000001844	72881	Zdhhc4	protein_coding	MGI Symbol	13	zinc finger, DHHC domain containing 4 [Source:MGI Symbol;Acc:MGI:1920131]	-0.22809	-0.398493	-0.0576865	0.0100791	0.0199505	-0.0481432	-0.193316	0.0970293	0.505823	0.772308	-0.552203	-0.742686	-0.36172	9.23282e-07	6.37462e-06	-0.0093865	-0.145979	0.127207	0.890026	0.997726	-0.439766	-0.588097	-0.291435	6.08886e-07	3.54124e-06	0.00534888	-0.149081	0.159779	0.944433	0.992517	-0.121823	-0.320891	0.0772458	0.222819	0.47878	0.0362321	-0.136892	0.209356	0.674006	0.801766	0.27597	0.0656224	0.486317
ENSMUSG00000001847	19353	Rac1	protein_coding	MGI Symbol	4	RAS-related C3 botulinum substrate 1 [Source:MGI Symbol;Acc:MGI:97845]	-0.203501	-0.336768	-0.0702342	0.00374575	0.00828299	-0.0633685	-0.171871	0.0451335	0.244237	0.571201	-0.315933	-0.457236	-0.174631	5.93687e-05	0.000239522	-0.0123648	-0.114347	0.089617	0.807312	0.992101	-0.286609	-0.400233	-0.172985	9.95636e-06	4.08412e-05	0.0244517	-0.0914595	0.140363	0.671565	0.935897	-0.0416895	-0.191612	0.108232	0.576564	0.781286	0.281124	0.147138	0.41511	0.000137883	0.00219986	0.0490636	-0.112039	0.210166
ENSMUSG00000001855	227720	Nup214	protein_coding	MGI Symbol	11	Nuclear pore complex protein Nup214 [Source:UniProtKB/Swiss-Prot;Acc:Q80U93]	-0.0697521	-0.274816	0.135312	0.495022	0.573902	-0.00763625	-0.179445	0.164173	0.928733	0.974443	-0.206877	-0.437235	0.023481	0.0769137	0.124131	-0.152526	-0.314765	0.00971395	0.0645938	0.832028	-0.226388	-0.406099	-0.0466768	0.014953	0.0271487	-0.0611563	-0.245287	0.122974	0.505175	0.882996	-0.133014	-0.375994	0.109966	0.274527	0.535972	-0.167504	-0.377734	0.0427271	0.114949	0.250321	0.129488	-0.126632	0.385609
ENSMUSG00000001870	268977	Ltbp1	protein_coding	MGI Symbol	7	Latent-transforming growth factor beta-binding protein 1 [Source:UniProtKB/Swiss-Prot;Acc:Q8CG19]	0.594724	0.196228	0.99322	0.00451256	0.00980502	-0.306044	-0.636693	0.0246053	0.0686469	0.310905	0.572627	0.00787612	1.13738	0.0470457	0.0814425	0.123117	-0.193862	0.440096	0.436327	0.983698	0.297829	-0.061229	0.656888	0.101258	0.146588	-0.0894809	-0.435804	0.256843	0.603762	0.917424	0.397915	-0.191484	0.987313	0.179604	0.426497	-0.168819	-0.600155	0.262516	0.432847	0.608515	-0.283946	-0.890918	0.323024
ENSMUSG00000001891	216558	Ugp2	protein_coding	MGI Symbol	4	UDP-glucose pyrophosphorylase 2 [Source:MGI Symbol;Acc:MGI:2183447]	1.51194	1.14891	1.87498	3.71091e-10	7.68475e-09	-0.402391	-0.712622	-0.0921603	0.0124227	0.121486	1.54992	1.17879	1.92105	3.46656e-10	9.05839e-09	-0.114122	-0.40146	0.173216	0.426139	0.983698	0.817939	0.50968	1.1262	4.36242e-06	1.97704e-05	-0.19992	-0.528149	0.128309	0.224957	0.696138	0.617858	0.230307	1.00541	0.00259406	0.0383269	0.374229	0.0217219	0.726737	0.0380699	0.115923	-0.440366	-0.856641	-0.0240916
ENSMUSG00000001909	212528	Trmt1	protein_coding	MGI Symbol	30	tRNA methyltransferase 1 [Source:MGI Symbol;Acc:MGI:1289155]	-0.297637	-0.473001	-0.122274	0.00145884	0.003593	-0.0842589	-0.231431	0.062913	0.253487	0.580402	-0.353658	-0.549096	-0.158221	0.000766503	0.00225557	0.0426629	-0.0957379	0.181064	0.536102	0.983698	-0.271315	-0.423735	-0.118895	0.000909126	0.00226749	-0.113897	-0.269863	0.0420685	0.147439	0.593752	-0.0396807	-0.245284	0.165923	0.698026	0.85852	0.223609	0.042984	0.404234	0.0166374	0.0644984	-0.028238	-0.245698	0.189221
ENSMUSG00000001910	66830	Nacc1	protein_coding	MGI Symbol	1	Nucleus accumbens-associated protein 1 [Source:UniProtKB/Swiss-Prot;Acc:Q7TSZ8]	-0.673756	-0.853836	-0.493676	4.76593e-09	6.20814e-08	-0.105384	-0.254024	0.0432563	0.159265	0.46543	-0.973045	-1.16767	-0.778422	3.13119e-12	2.53202e-10	-0.0161432	-0.156074	0.123788	0.816479	0.992101	-0.747339	-0.902088	-0.59259	8.04873e-12	2.67337e-10	-0.0489369	-0.207487	0.109613	0.535581	0.893169	-0.24185	-0.447385	-0.0363139	0.022355	0.136175	-0.0849775	-0.268048	0.0980931	0.35308	0.53097	0.193905	-0.0256698	0.41348
ENSMUSG00000001911	18032	Nfix	protein_coding	MGI Symbol	8	Nuclear factor 1 X-type [Source:UniProtKB/Swiss-Prot;Acc:P70257]	-0.0590948	-0.379963	0.261773	0.711173	0.770438	0.120853	-0.142971	0.384676	0.359368	0.674243	-0.56948	-0.918487	-0.220473	0.00210787	0.00548925	-0.168232	-0.416537	0.080074	0.1781	0.93701	0.0081238	-0.264753	0.281	0.952228	0.961856	0.290612	0.0119316	0.569292	0.041412	0.340534	-0.745835	-1.11273	-0.37894	0.000204657	0.00944194	-0.156988	-0.480981	0.167004	0.332612	0.51131	0.631237	0.237334	1.02514
ENSMUSG00000001918	20514	Slc1a5	protein_coding	MGI Symbol	8	solute carrier family 1 (neutral amino acid transporter), member 5 [Source:MGI Symbol;Acc:MGI:105305]	-0.833853	-1.22821	-0.439501	0.000124853	0.000406395	0.4026	0.0344942	0.770706	0.0329161	0.208731	-0.0143142	-0.514945	0.486316	0.954117	0.966847	0.131089	-0.186915	0.449093	0.408968	0.983698	0.139118	-0.209039	0.487274	0.423355	0.498063	0.0238563	-0.328854	0.376567	0.891745	0.982923	-0.0223428	-0.542648	0.497962	0.931139	0.971771	-0.155386	-0.568448	0.257675	0.450791	0.624072	-0.416939	-0.937172	0.103294
ENSMUSG00000001924	22201	Uba1	protein_coding	MGI Symbol	6	ubiquitin-like modifier activating enzyme 1 [Source:MGI Symbol;Acc:MGI:98890]	-0.397768	-0.545686	-0.24985	3.48195e-06	1.75612e-05	-0.0279063	-0.147595	0.0917821	0.639422	0.848308	-0.430271	-0.586867	-0.273676	2.40496e-06	1.47257e-05	-0.0155998	-0.128207	0.0970079	0.780525	0.991144	-0.186466	-0.311543	-0.0613887	0.00455172	0.00949151	0.050611	-0.0772769	0.178499	0.427785	0.838334	-0.259405	-0.425194	-0.0936163	0.00305187	0.0418529	-0.0468619	-0.195524	0.101801	0.526977	0.686445	0.00459688	-0.174503	0.183696
ENSMUSG00000001930	22371	Vwf	protein_coding	MGI Symbol	11	Von Willebrand factor [Source:MGI Symbol;Acc:MGI:98941]	0.0264894	-0.25784	0.310818	0.851316	0.882929	0.119356	-0.120338	0.35905	0.319579	0.640885	0.328708	-0.0213468	0.678763	0.0648951	0.107499	-0.0105228	-0.232664	0.211618	0.92406	0.998763	-0.0151406	-0.262089	0.231808	0.901815	0.921759	0.170658	-0.0842454	0.425561	0.183165	0.643622	0.333326	-0.0329737	0.699625	0.073236	0.261658	0.315402	0.0132841	0.617521	0.0411995	0.122784	-0.182863	-0.564868	0.199143
ENSMUSG00000001942	22619	Siae	protein_coding	MGI Symbol	7	Sialate O-acetylesterase Sialate O-acetylesterase small subunit Sialate O-acetylesterase large subunit [Source:UniProtKB/Swiss-Prot;Acc:P70665]	0.60592	0.421558	0.790283	8.0089e-08	6.7937e-07	-0.145408	-0.297339	0.00652296	0.0601328	0.289877	0.386498	0.17817	0.594826	0.000587503	0.00178561	-0.0349421	-0.177971	0.108087	0.623551	0.986383	0.158857	-0.000703779	0.318418	0.0509675	0.0800283	-0.0926727	-0.254821	0.0694756	0.254295	0.72599	0.192699	-0.0273076	0.412705	0.0841811	0.282078	-0.049644	-0.2386	0.139312	0.597699	0.745016	0.0740144	-0.159024	0.307053
ENSMUSG00000001943	57276	Vsig2	protein_coding	MGI Symbol	6	V-set and immunoglobulin domain containing 2 [Source:MGI Symbol;Acc:MGI:1928009]	0.24591	-0.2326	0.724421	0.304529	0.383638	-0.352052	-0.773174	0.0690698	0.0987008	0.367918	-0.0313165	-0.664945	0.602311	0.920777	0.940771	-0.130418	-0.550253	0.289417	0.532969	0.983698	-0.142973	-0.594753	0.308807	0.525359	0.595881	0.241675	-0.255029	0.738379	0.330633	0.777744	-0.0187617	-0.673993	0.63647	0.95405	0.981484	0.0765617	-0.461555	0.614678	0.774756	0.865602	-0.0748251	-0.747962	0.598312
ENSMUSG00000001946	69524	Esam	protein_coding	MGI Symbol	6	Endothelial cell-selective adhesion molecule [Source:UniProtKB/Swiss-Prot;Acc:Q925F2]	0.177224	-0.0818938	0.436342	0.174115	0.238502	-0.020433	-0.238862	0.197995	0.850715	0.942761	0.454971	0.118359	0.791584	0.00942905	0.0203376	-0.00703619	-0.21203	0.197957	0.944933	0.998763	0.108754	-0.120228	0.337736	0.342157	0.415638	0.00721163	-0.224004	0.238428	0.949954	0.993277	0.339181	-0.0125556	0.690917	0.0583094	0.230522	0.334614	0.0479185	0.621309	0.0233898	0.0824772	-0.29818	-0.662514	0.0661536
ENSMUSG00000001962	108160	Fam50a	protein_coding	MGI Symbol	3	Protein FAM50A [Source:UniProtKB/Swiss-Prot;Acc:Q9WV03]	-0.225018	-0.424021	-0.0260149	0.0277497	0.0482947	-0.096022	-0.264999	0.072955	0.256979	0.584265	-0.515853	-0.738697	-0.293008	3.6424e-05	0.00015726	0.121253	-0.0371661	0.279673	0.129465	0.9248	-0.0755213	-0.249981	0.0989388	0.386115	0.459916	0.0878061	-0.0911151	0.266727	0.326533	0.774271	-0.319078	-0.553598	-0.0845588	0.00900728	0.0807856	-0.254164	-0.458205	-0.0501222	0.0160245	0.0628923	0.194813	-0.0515788	0.441204
ENSMUSG00000001964	13726	Emd	protein_coding	MGI Symbol	6	Emerin [Source:UniProtKB/Swiss-Prot;Acc:O08579]	-0.257429	-0.427993	-0.0868656	0.00412192	0.00903484	-0.0925088	-0.239282	0.0542646	0.209552	0.528185	-0.507897	-0.701922	-0.313872	5.4655e-06	2.98363e-05	-0.0926309	-0.232051	0.0467895	0.186445	0.937667	-0.20277	-0.356205	-0.0493356	0.010985	0.0207237	-0.0589723	-0.216535	0.098591	0.453069	0.855848	-0.397757	-0.602085	-0.19343	0.000342665	0.0127879	-0.381303	-0.557051	-0.205555	8.91916e-05	0.0016349	0.157959	-0.0546327	0.37055
ENSMUSG00000001983	70207	Taco1	protein_coding	MGI Symbol	1	Translational activator of cytochrome c oxidase 1 [Source:UniProtKB/Swiss-Prot;Acc:Q8K0Z7]	0.507554	0.292324	0.722784	2.7822e-05	0.000108473	0.133068	-0.0410541	0.307191	0.130034	0.420192	0.297128	0.0478389	0.546417	0.0207892	0.0402909	-0.0506476	-0.212858	0.111563	0.530883	0.983698	0.337969	0.152277	0.523662	0.000721266	0.00184573	0.110785	-0.0744641	0.296035	0.233319	0.703368	-0.0914889	-0.356658	0.17368	0.488902	0.7215	0.00137679	-0.223212	0.225966	0.990157	0.994215	0.343494	0.0639405	0.623048
ENSMUSG00000001986	53623	Gria3	protein_coding	MGI Symbol	9	Mus musculus glutamate receptor, ionotropic, AMPA3 (alpha 3) (Gria3), transcript variant 5, mRNA. [Source:RefSeq mRNA;Acc:NM_001358361]	0.0129335	-0.714116	0.739982	0.971443	0.978678	-0.132098	-0.778324	0.514129	0.681153	0.868452	0.822329	-0.286296	1.93095	0.141355	0.207926	0.558196	-0.0159293	1.13232	0.0563617	0.830977	1.24566	0.54203	1.94928	0.000961426	0.00238147	-1.04854	-1.56629	-0.530787	0.000214297	0.0180719	0.13487	-1.04603	1.31577	0.818284	0.921287	-2.29693	-3.01659	-1.57726	1.45405e-07	2.99741e-05	-0.941494	-2.0991	0.216108
ENSMUSG00000001995	244668	Sipa1l2	protein_coding	MGI Symbol	4	Mus musculus signal-induced proliferation-associated 1 like 2 (Sipa1l2), transcript variant 2, mRNA. [Source:RefSeq mRNA;Acc:NM_001357372]	-0.0857499	-0.505235	0.333736	0.681149	0.743868	0.0785965	-0.28554	0.442733	0.664429	0.859522	-0.412476	-0.893165	0.0682124	0.0904156	0.14259	0.0918979	-0.241587	0.425383	0.579992	0.983698	-0.282928	-0.63342	0.0675642	0.110411	0.158146	0.523043	0.122485	0.923601	0.0118919	0.17585	-0.0376505	-0.53029	0.454989	0.877787	0.950577	0.120772	-0.292173	0.533716	0.557086	0.710336	0.405323	-0.118542	0.929187
ENSMUSG00000001998	108011	Ap4e1	protein_coding	MGI Symbol	8	AP-4 complex subunit epsilon-1 [Source:UniProtKB/Swiss-Prot;Acc:Q80V94]	0.825301	0.615758	1.03484	1.43715e-09	2.31854e-08	0.0444812	-0.116551	0.205514	0.579092	0.815514	0.810426	0.540771	1.08008	4.70875e-07	3.58455e-06	0.106705	-0.0413826	0.254792	0.152749	0.932653	0.820411	0.641092	0.99973	3.39162e-11	8.84435e-10	0.192603	0.02367	0.361537	0.0265608	0.271825	0.0967202	-0.191272	0.384713	0.500463	0.728984	0.15551	-0.0795267	0.390547	0.188237	0.350959	0.0593563	-0.241793	0.360506
ENSMUSG00000001999	109778	Blvra	protein_coding	MGI Symbol	5	Biliverdin reductase A [Source:UniProtKB/Swiss-Prot;Acc:Q9CY64]	0.427428	0.214386	0.640471	0.000240019	0.000723567	0.263949	0.0939618	0.433937	0.00325704	0.0612814	0.895589	0.614694	1.17648	1.4848e-07	1.33263e-06	0.0057917	-0.14786	0.159443	0.939537	0.998763	0.648131	0.464327	0.831936	1.79576e-08	1.69858e-07	0.0366784	-0.136922	0.210279	0.671085	0.935763	0.253249	-0.0452094	0.551708	0.093928	0.299348	0.136724	-0.0998619	0.373311	0.249129	0.422517	-0.204211	-0.51307	0.104648
ENSMUSG00000002006	245469	Pdzd4	protein_coding	MGI Symbol	2	PDZ domain-containing protein 4 [Source:UniProtKB/Swiss-Prot;Acc:Q9QY39]	0.4038	-0.131612	0.939212	0.134998	0.191483	-0.65661	-1.13128	-0.181939	0.0080132	0.0986421	-0.981134	-1.60421	-0.358057	0.00288938	0.00723014	0.224438	-0.245349	0.694226	0.339355	0.979326	-0.303926	-0.783451	0.175599	0.207069	0.27161	0.583641	0.0225029	1.14478	0.0419148	0.341584	-0.452769	-1.08322	0.177682	0.154076	0.391875	0.0850703	-0.477267	0.647408	0.760942	0.857174	0.728323	0.0578181	1.39883
ENSMUSG00000002010	15929	Idh3g	protein_coding	MGI Symbol	9	isocitrate dehydrogenase 3 (NAD+), gamma [Source:MGI Symbol;Acc:MGI:1099463]	-1.03622	-1.24175	-0.830695	2.48466e-12	1.55886e-10	-0.0251781	-0.188558	0.138202	0.756619	0.903077	-1.23311	-1.45314	-1.01307	1.2424e-13	2.83072e-11	-0.00287794	-0.15661	0.150854	0.969948	0.998763	-1.04922	-1.22415	-0.874281	1.68466e-14	2.25554e-12	-0.0154062	-0.190251	0.159439	0.859287	0.977367	-0.186769	-0.422108	0.04857	0.116341	0.333944	-0.123364	-0.33564	0.0889116	0.246528	0.419614	0.171706	-0.0812056	0.424617
ENSMUSG00000002012	93843	Pnck	protein_coding	MGI Symbol	5	pregnancy upregulated non-ubiquitously expressed CaM kinase [Source:MGI Symbol;Acc:MGI:1347357]	-1.22666	-2.32271	-0.130606	0.0292798	0.0505996	1.04862	0.0789599	2.01829	0.0348098	0.215479	0.788704	-0.599277	2.17668	0.256993	0.341264	-0.975108	-1.86026	-0.0899508	0.0317445	0.774936	-1.02507	-1.98511	-0.0650304	0.0370356	0.0602025	-0.230318	-1.28582	0.825187	0.660992	0.932685	0.838669	-0.598226	2.27556	0.244525	0.502586	0.353615	-0.73044	1.43767	0.512775	0.675054	-0.966735	-2.44578	0.512307
ENSMUSG00000002014	20832	Ssr4	protein_coding	MGI Symbol	8	signal sequence receptor, delta [Source:MGI Symbol;Acc:MGI:1099464]	-0.386529	-0.603455	-0.169603	0.000899757	0.00233843	-0.141343	-0.317993	0.0353071	0.113472	0.393397	-0.386107	-0.617572	-0.154642	0.0017196	0.00460939	0.0129796	-0.152996	0.178956	0.874971	0.997433	-0.20131	-0.385736	-0.0168833	0.0332428	0.0547029	-0.0559435	-0.244673	0.132786	0.551789	0.899734	-0.171817	-0.41685	0.0732155	0.163772	0.404817	-0.0655395	-0.284246	0.153167	0.547462	0.701796	-0.141765	-0.405256	0.121726
ENSMUSG00000002015	27061	Bcap31	protein_coding	MGI Symbol	1	B-cell receptor-associated protein 31 [Source:UniProtKB/Swiss-Prot;Acc:Q61335]	0.000613303	-0.190903	0.19213	0.994858	0.996316	-0.109325	-0.266172	0.0475207	0.166232	0.475519	-0.0503965	-0.253209	0.152416	0.617631	0.695253	-0.0103236	-0.157562	0.136915	0.887806	0.99766	-0.186194	-0.349819	-0.0225687	0.0268333	0.0453874	-0.0673367	-0.235115	0.100442	0.421335	0.8347	0.125474	-0.0895307	0.340478	0.244589	0.502607	0.444888	0.252958	0.636818	3.57262e-05	0.00086887	-0.0583156	-0.28899	0.172359
ENSMUSG00000002017	72722	Fam98a	protein_coding	MGI Symbol	3	Protein FAM98A [Source:UniProtKB/Swiss-Prot;Acc:Q3TJZ6]	0.160295	-0.054048	0.374638	0.138212	0.195253	-0.144328	-0.322707	0.0340508	0.109612	0.386442	-0.287838	-0.525541	-0.050135	0.0189733	0.0371935	0.00523098	-0.162915	0.173377	0.950082	0.998763	0.140422	-0.0475411	0.328385	0.138607	0.192318	-0.043226	-0.233437	0.146985	0.647905	0.93079	-0.423029	-0.67514	-0.170918	0.00162692	0.0295096	-0.452756	-0.673318	-0.232194	0.000181514	0.00269408	0.303805	0.0380482	0.569561
ENSMUSG00000002020	16997	Ltbp2	protein_coding	MGI Symbol	7	latent transforming growth factor beta binding protein 2 [Source:HGNC Symbol;Acc:HGNC:6715]	-0.256053	-1.20452	0.692411	0.587686	0.659832	0.131417	-0.713929	0.976764	0.754555	0.902505	0.243371	-1.00114	1.48788	0.694229	0.760006	0.0747513	-0.694872	0.844374	0.845074	0.994382	-0.386511	-1.18446	0.411435	0.332771	0.406251	-0.00803116	-0.865033	0.848971	0.984954	0.997001	0.704633	-0.557585	1.96685	0.265306	0.526437	-0.205365	-1.08745	0.67672	0.63991	0.777847	-0.368006	-1.68473	0.948721
ENSMUSG00000002028	214162	Kmt2a	protein_coding	MGI Symbol	6	Mus musculus lysine (K)-specific methyltransferase 2A (Kmt2a), transcript variant 1, mRNA. [Source:RefSeq mRNA;Acc:NM_001357549]	0.134581	-0.0592308	0.328393	0.167797	0.230919	-0.176897	-0.336734	-0.0170606	0.0310071	0.201849	-0.0497513	-0.259663	0.16016	0.633915	0.709589	0.0177601	-0.132389	0.16791	0.811927	0.992101	0.16295	-0.00364865	0.329549	0.0549661	0.085634	-0.031293	-0.201929	0.139343	0.712341	0.945818	-0.194941	-0.416917	0.0270343	0.0833909	0.281225	-0.262377	-0.459491	-0.0652623	0.0104671	0.0464896	0.00743485	-0.229373	0.244243
ENSMUSG00000002031	76568	Ift46	protein_coding	MGI Symbol	13	Intraflagellar transport [Source:UniProtKB/Swiss-Prot;Acc:Q9DB07]	-0.0945677	-0.256546	0.0674105	0.244396	0.31797	-0.00795454	-0.143803	0.127894	0.906207	0.966942	-0.120773	-0.304366	0.0628215	0.190739	0.267394	0.0783905	-0.0488194	0.2056	0.219675	0.950593	0.0608516	-0.0806253	0.202329	0.389129	0.463125	0.145829	0.00134445	0.290313	0.0480114	0.366561	-0.103234	-0.296986	0.0905191	0.287342	0.549266	0.19158	0.0221134	0.361046	0.0277804	0.0935159	0.0182502	-0.185438	0.221938
ENSMUSG00000002032	71687	Tmem25	protein_coding	MGI Symbol	8	Mus musculus transmembrane protein 25 (Tmem25), transcript variant 5, mRNA. [Source:RefSeq mRNA;Acc:NM_001357386]	-0.13479	-0.430571	0.16099	0.361831	0.443982	0.103922	-0.140605	0.348449	0.394749	0.700259	-0.260005	-0.582015	0.0620057	0.110321	0.168498	0.0252201	-0.204623	0.255063	0.825292	0.992372	-0.320183	-0.575363	-0.065003	0.0153255	0.0277358	0.113041	-0.147925	0.374007	0.385814	0.813933	0.0853984	-0.25516	0.425957	0.614432	0.804582	0.265136	-0.0366187	0.566891	0.0832436	0.199278	0.229137	-0.133332	0.591605
ENSMUSG00000002043	67091	Trappc6a	protein_coding	MGI Symbol	7	trafficking protein particle complex 6A [Source:MGI Symbol;Acc:MGI:1914341]	-0.0253262	-0.297852	0.2472	0.851684	0.88317	0.0435454	-0.191216	0.278307	0.709206	0.883185	0.0250282	-0.310141	0.360197	0.880568	0.911549	0.0638569	-0.152971	0.280685	0.554351	0.983698	-0.283876	-0.5137	-0.0540519	0.0168651	0.0301566	0.132289	-0.114112	0.378689	0.28373	0.748183	0.372761	0.0290417	0.71648	0.0343286	0.172067	0.224096	-0.0506758	0.498869	0.106902	0.23712	-0.00680896	-0.369432	0.355814
ENSMUSG00000002052	20926	Supt6	protein_coding	MGI Symbol	2	Transcription elongation factor SPT6 [Source:UniProtKB/Swiss-Prot;Acc:Q62383]	-0.386708	-0.596826	-0.17659	0.000640571	0.00172167	-0.174193	-0.343891	-0.00449609	0.0445192	0.24687	-0.849163	-1.07397	-0.62436	3.82562e-09	6.42734e-08	0.0084031	-0.150683	0.167489	0.915353	0.998135	-0.37849	-0.556277	-0.200703	0.000114369	0.000359204	0.00973851	-0.171222	0.190699	0.913765	0.986438	-0.46227	-0.700673	-0.223867	0.000358567	0.0130076	-0.301877	-0.515816	-0.0879378	0.00693832	0.0346303	0.288262	0.031574	0.544949
ENSMUSG00000002058	22248	Unc119	protein_coding	MGI Symbol	7	unc-119 lipid binding chaperone [Source:MGI Symbol;Acc:MGI:1328357]	-1.17276	-1.51524	-0.830277	3.38444e-08	3.22853e-07	0.0107052	-0.328454	0.349865	0.949354	0.98296	-1.07907	-1.48002	-0.678124	3.43394e-06	2.00254e-05	-0.0896971	-0.409363	0.229969	0.573128	0.983698	-1.72711	-2.02366	-1.43055	4.0321e-14	3.93721e-12	-0.292866	-0.641273	0.0555416	0.0969275	0.506558	0.55834	0.175565	0.941114	0.00540153	0.0583123	0.168911	-0.127515	0.465338	0.255689	0.429522	-0.0829834	-0.486743	0.320776
ENSMUSG00000002059	19376	Rab34	protein_coding	MGI Symbol	9	RAB34, member RAS oncogene family [Source:HGNC Symbol;Acc:HGNC:16519]	-0.208228	-0.586065	0.169608	0.271367	0.347731	-0.170428	-0.515659	0.174802	0.323707	0.645475	-0.0631532	-0.570813	0.444506	0.802404	0.849223	-0.166694	-0.504371	0.170982	0.323721	0.97665	-1.11565	-1.4446	-0.786708	4.14991e-08	3.48608e-07	-0.579943	-0.937205	-0.222681	0.00220887	0.0697971	0.885804	0.383911	1.3877	0.000991809	0.0220182	0.0332692	-0.312404	0.378942	0.846463	0.91213	-0.315504	-0.845876	0.214869
ENSMUSG00000002064	20316	Sdf2	protein_coding	MGI Symbol	3	stromal cell derived factor 2 [Source:HGNC Symbol;Acc:HGNC:10675]	-0.634509	-0.871187	-0.397832	3.66744e-06	1.83825e-05	-0.19553	-0.394721	0.00366056	0.0541393	0.274484	-1.01798	-1.27637	-0.759588	1.42771e-09	2.87023e-08	0.131304	-0.0562211	0.318829	0.164362	0.934297	-0.658353	-0.862873	-0.453833	1.22417e-07	8.89662e-07	0.0731481	-0.138795	0.285092	0.488765	0.872945	-0.228323	-0.499301	0.0426551	0.0961629	0.303636	0.205423	-0.0350028	0.445848	0.0917534	0.212862	0.18794	-0.100341	0.476221
ENSMUSG00000002068	12447	Ccne1	protein_coding	MGI Symbol	5	G1/S-specific cyclin-E1 [Source:UniProtKB/Swiss-Prot;Acc:Q61457]	-0.345655	-1.13985	0.44854	0.383577	0.466039	-0.432161	-1.19104	0.326721	0.25598	0.583341	-0.823156	-1.82434	0.178027	0.104186	0.160792	0.0725076	-0.671488	0.816503	0.844554	0.994382	-0.497956	-1.25101	0.255101	0.188495	0.250949	-0.0424624	-0.867381	0.782456	0.917503	0.987208	-0.252692	-1.26063	0.755243	0.614513	0.804582	-0.346947	-1.15508	0.461183	0.389999	0.56737	0.0453392	-0.982868	1.07355
ENSMUSG00000002083	170770	Bbc3	protein_coding	MGI Symbol	4	Bcl-2-binding component 3 [Source:UniProtKB/Swiss-Prot;Acc:Q99ML1]	-1.32327	-1.86184	-0.784693	1.50125e-05	6.32395e-05	0.772432	0.280678	1.26419	0.00295168	0.0587936	-0.298406	-0.900629	0.303816	0.321928	0.410736	0.265723	-0.140139	0.671584	0.192797	0.942258	-0.238874	-0.668659	0.190912	0.267376	0.337751	-0.208851	-0.646188	0.228485	0.339547	0.782505	0.20619	-0.412408	0.824789	0.503669	0.731358	0.113724	-0.394723	0.622172	0.653075	0.787364	-0.25243	-0.893455	0.388595
ENSMUSG00000002102	19182	Psmc3	protein_coding	MGI Symbol	10	proteasome (prosome, macropain) 26S subunit, ATPase 3 [Source:MGI Symbol;Acc:MGI:1098754]	-0.30921	-0.481739	-0.136681	0.00084747	0.00221629	0.021471	-0.118735	0.161677	0.758099	0.903077	-0.369178	-0.552568	-0.185789	0.000230452	0.000788223	-0.0101734	-0.142298	0.121951	0.876879	0.99766	-0.306923	-0.454223	-0.159624	0.000150546	0.000457344	0.0925754	-0.0573004	0.242451	0.218613	0.688901	-0.0724286	-0.267036	0.122179	0.455588	0.697052	0.0640571	-0.110887	0.239001	0.462856	0.634821	0.0814392	-0.127703	0.290581
ENSMUSG00000002103	11432	Acp2	protein_coding	MGI Symbol	5	Mus musculus acid phosphatase 2, lysosomal (Acp2), transcript variant 1, mRNA. [Source:RefSeq mRNA;Acc:NM_001357067]	0.0328454	-0.118666	0.184356	0.663058	0.727906	0.173883	0.048758	0.299008	0.00775306	0.0972477	-0.0157587	-0.179887	0.14837	0.846826	0.884969	-0.208173	-0.32589	-0.090456	0.000972093	0.356348	-0.171965	-0.302508	-0.0414215	0.0112225	0.0211044	0.0638727	-0.0695723	0.197318	0.338458	0.7818	-0.0519672	-0.225525	0.121591	0.547789	0.761087	0.0977678	-0.0566038	0.252139	0.207406	0.375254	0.222487	0.0374533	0.407521
ENSMUSG00000002105	68427	Slc39a13	protein_coding	MGI Symbol	11	solute carrier family 39 (metal ion transporter), member 13 [Source:MGI Symbol;Acc:MGI:1915677]	-0.521355	-0.731333	-0.311378	1.27602e-05	5.47099e-05	0.0145072	-0.173356	0.202371	0.876525	0.954368	-0.639896	-0.881085	-0.398707	4.37145e-06	2.45873e-05	-0.0208163	-0.1966	0.154967	0.811713	0.992101	-0.462099	-0.648324	-0.275874	1.28818e-05	5.13649e-05	-0.139615	-0.334933	0.0557026	0.155957	0.607632	-0.198613	-0.447515	0.0502887	0.114423	0.331512	-0.469828	-0.675881	-0.263775	4.51668e-05	0.0010382	0.133048	-0.125737	0.391833
ENSMUSG00000002107	14007	Celf2	protein_coding	MGI Symbol	28	CUGBP Elav-like family member 2 [Source:UniProtKB/Swiss-Prot;Acc:Q9Z0H4]	0.199979	-0.0397728	0.439731	0.0994325	0.146775	0.291111	0.0939012	0.488322	0.00492237	0.0763762	0.196885	-0.0771777	0.470947	0.153949	0.223448	-0.012656	-0.194067	0.168755	0.888363	0.99766	-0.266972	-0.466172	-0.0677722	0.00999279	0.0191044	0.159882	-0.0474227	0.367186	0.126652	0.567602	0.451201	0.165052	0.737349	0.00285555	0.0401353	0.142369	-0.093047	0.377785	0.228208	0.399533	0.294206	-0.0118977	0.600309
ENSMUSG00000002108	22259	Nr1h3	protein_coding	MGI Symbol	8	Mus musculus nuclear receptor subfamily 1, group H, member 3 (Nr1h3), transcript variant 3, mRNA. [Source:RefSeq mRNA;Acc:NM_001355279]	-0.405209	-0.589784	-0.220634	7.61613e-05	0.000262502	-0.0171959	-0.166559	0.132167	0.816849	0.92812	-0.696156	-0.89383	-0.498482	1.84621e-08	2.34376e-07	-0.0242167	-0.164755	0.116322	0.728982	0.990955	-0.447116	-0.604439	-0.289794	1.32371e-06	6.97685e-06	0.0160068	-0.143742	0.175756	0.84024	0.97274	-0.273256	-0.483195	-0.0633173	0.0121442	0.0964038	-0.0934525	-0.281963	0.0950583	0.321704	0.500027	0.27375	0.0482874	0.499213
ENSMUSG00000002109	107986	Ddb2	protein_coding	MGI Symbol	5	DNA damage-binding protein 2 [Source:UniProtKB/Swiss-Prot;Acc:Q99J79]	-0.214341	-0.509546	0.080864	0.149714	0.20918	-0.10601	-0.373461	0.16144	0.427057	0.725751	-0.542491	-0.895325	-0.189656	0.00353847	0.00866404	0.0274969	-0.225183	0.280176	0.826712	0.992854	-0.368816	-0.630752	-0.10688	0.00704781	0.0140276	-0.171961	-0.447612	0.103689	0.21415	0.683547	-0.146178	-0.505699	0.213343	0.415342	0.664899	-0.0163104	-0.315728	0.283107	0.912715	0.95109	0.222139	-0.152171	0.59645
ENSMUSG00000002111	20375	Spi1	protein_coding	MGI Symbol	4	spleen focus forming virus (SFFV) proviral integration oncogene [Source:MGI Symbol;Acc:MGI:98282]	-0.321662	-0.729582	0.086257	0.118616	0.17122	0.126975	-0.234516	0.488465	0.481137	0.759146	-0.30289	-0.784606	0.178826	0.210622	0.289885	-6.16077e-05	-0.332688	0.332564	0.999703	0.999934	0.278112	-0.100215	0.656439	0.14485	0.199933	0.0657358	-0.311968	0.44344	0.726378	0.947421	-0.581064	-1.0954	-0.0667277	0.0278779	0.152193	-0.667048	-1.09393	-0.240168	0.00308646	0.0197458	0.108202	-0.409266	0.62567
ENSMUSG00000002129	67465	Sf3a1	protein_coding	MGI Symbol	4	Splicing factor 3A subunit 1 [Source:UniProtKB/Swiss-Prot;Acc:Q8K4Z5]	-0.64928	-0.884046	-0.414514	2.14628e-06	1.15419e-05	-0.0121848	-0.205795	0.181426	0.899229	0.963848	-0.898972	-1.15267	-0.645278	1.61288e-08	2.09255e-07	-0.0173497	-0.199389	0.16469	0.84794	0.994382	-0.419948	-0.621467	-0.218429	0.000150324	0.000456774	0.00891845	-0.197599	0.215436	0.93075	0.990508	-0.496374	-0.764388	-0.228359	0.0005986	0.0171234	-0.403301	-0.642255	-0.164347	0.00153918	0.011984	0.237507	-0.0488331	0.523847
ENSMUSG00000002147	20852	Stat6	protein_coding	MGI Symbol	5	Signal transducer and transcription activator 6 [Source:UniProtKB/Swiss-Prot;Acc:P52633]	-0.282451	-0.447176	-0.117726	0.00132165	0.00329132	-0.0289584	-0.163073	0.105156	0.664313	0.859478	-0.221142	-0.39597	-0.0463147	0.0145755	0.0296882	-0.0129243	-0.139094	0.113245	0.836726	0.993636	0.00941958	-0.130235	0.149074	0.892045	0.914075	-0.09798	-0.241802	0.0458415	0.175773	0.634536	-0.243486	-0.428282	-0.0586908	0.0112057	0.0913919	-0.11136	-0.276773	0.054053	0.1808	0.341732	-0.0902667	-0.289546	0.109013
ENSMUSG00000002205	101568	Vrk3	protein_coding	MGI Symbol	10	vaccinia related kinase 3 [Source:MGI Symbol;Acc:MGI:2182465]	-0.232517	-0.378815	-0.0862191	0.00266544	0.00614196	-0.0926349	-0.216848	0.0315778	0.139273	0.434898	-0.373099	-0.538995	-0.207203	5.47512e-05	0.000223602	0.103993	-0.0125286	0.220515	0.0786922	0.859946	-0.139772	-0.267801	-0.0117435	0.0332155	0.054666	-0.0677696	-0.198396	0.0628564	0.300009	0.754641	-0.129334	-0.303505	0.0448376	0.140933	0.371041	-0.0402485	-0.190964	0.110467	0.59171	0.740037	0.0479469	-0.135072	0.230966
ENSMUSG00000002210	71997	Smg9	protein_coding	MGI Symbol	7	Protein SMG9 [Source:UniProtKB/Swiss-Prot;Acc:Q9DB90]	-0.724032	-0.906473	-0.541592	1.19915e-09	1.99148e-08	0.0182251	-0.147836	0.184286	0.825259	0.931902	-0.762055	-0.97142	-0.55269	8.89466e-09	1.26522e-07	-0.085792	-0.242117	0.0705333	0.273342	0.968937	-0.665521	-0.82864	-0.502403	6.14713e-10	9.78342e-09	0.121327	-0.0588313	0.301485	0.180659	0.639851	-0.182326	-0.39681	0.032159	0.0933552	0.298254	-0.186921	-0.367753	-0.00608982	0.0431274	0.126341	0.0562477	-0.166332	0.278828
ENSMUSG00000002221	55982	Paxip1	protein_coding	MGI Symbol	7	PAX-interacting protein 1 [Source:UniProtKB/Swiss-Prot;Acc:Q6NZQ4]	-0.63811	-0.86561	-0.41061	1.67454e-06	9.31108e-06	-0.0200897	-0.211958	0.171779	0.833164	0.936173	-0.907617	-1.15573	-0.659503	7.9509e-09	1.16544e-07	0.0125341	-0.167632	0.192701	0.888673	0.99766	-0.522979	-0.720058	-0.325901	4.35581e-06	1.97517e-05	0.0735872	-0.130893	0.278067	0.470513	0.865305	-0.372104	-0.632758	-0.111449	0.00636351	0.0642811	-0.103564	-0.334215	0.127086	0.368854	0.546091	0.249417	-0.0271755	0.52601
ENSMUSG00000002222	68477	Rmnd5a	protein_coding	MGI Symbol	5	A [Source:UniProtKB/Swiss-Prot;Acc:Q80YQ8]	0.476389	0.235005	0.717773	0.000291933	0.000862253	-0.0635129	-0.26458	0.137554	0.526123	0.785104	0.745275	0.493801	0.996749	6.13286e-07	4.49477e-06	0.0616854	-0.127688	0.251059	0.513369	0.983698	0.389749	0.182812	0.596686	0.000498008	0.00132969	-0.179639	-0.396846	0.0375675	0.102227	0.519008	0.417211	0.152259	0.682164	0.00288934	0.0403917	-0.183798	-0.427424	0.0598278	0.134876	0.278392	-0.332399	-0.61714	-0.0476572
ENSMUSG00000002227	17454	Mov10	protein_coding	MGI Symbol	9	Putative helicase MOV-10 [Source:UniProtKB/Swiss-Prot;Acc:P23249]	-0.135293	-0.314006	0.0434191	0.133569	0.189663	-0.0102044	-0.160143	0.139735	0.891078	0.960049	-0.18559	-0.386946	0.0157654	0.0697647	0.114268	-0.0136354	-0.154505	0.127235	0.845598	0.994382	0.0616229	-0.0956388	0.218885	0.432308	0.506769	-0.0901296	-0.249105	0.0688457	0.258062	0.72895	-0.260849	-0.473994	-0.0477031	0.0178256	0.118636	-0.366163	-0.550325	-0.182002	0.000267385	0.00349701	0.0400928	-0.183515	0.263701
ENSMUSG00000002233	11853	Rhoc	protein_coding	MGI Symbol	6	Rho-related GTP-binding protein RhoC [Source:UniProtKB/Swiss-Prot;Acc:Q62159]	-0.224284	-0.598026	0.149458	0.231736	0.303934	-0.177843	-0.511439	0.155752	0.287076	0.611607	-0.479411	-0.926352	-0.0324695	0.0362232	0.0649766	0.139658	-0.17416	0.453477	0.373069	0.983698	-0.123457	-0.459284	0.212369	0.461082	0.534888	-0.113531	-0.457417	0.230354	0.507717	0.883842	-0.216295	-0.678955	0.246364	0.349683	0.608051	0.273194	-0.135731	0.682118	0.184075	0.34551	0.0772838	-0.40037	0.554938
ENSMUSG00000002249	21678	Tead3	protein_coding	MGI Symbol	8	TEA domain family member 3 [Source:MGI Symbol;Acc:MGI:109241]	-0.918009	-1.13315	-0.702863	2.0295e-10	4.68989e-09	-0.0244175	-0.212101	0.163266	0.793561	0.917684	-1.0094	-1.2465	-0.772295	2.14842e-10	6.27259e-09	-0.00771658	-0.183974	0.16854	0.929798	0.998763	-0.564426	-0.753827	-0.375026	5.52697e-07	3.25232e-06	-0.255125	-0.450597	-0.0596534	0.0119283	0.17585	-0.452687	-0.699715	-0.205658	0.000670764	0.0177758	-0.00794935	-0.226962	0.211063	0.941774	0.967475	0.0669703	-0.192413	0.326353
ENSMUSG00000002250	19015	Ppard	protein_coding	MGI Symbol	6	Peroxisome proliferator-activated receptor delta [Source:UniProtKB/Swiss-Prot;Acc:P35396]	-1.5849	-1.91167	-1.25813	7.16257e-12	3.66222e-10	0.163797	-0.135916	0.46351	0.275318	0.60063	-0.983242	-1.34782	-0.61866	3.31474e-06	1.94e-05	0.0394009	-0.235141	0.313943	0.772853	0.990955	-0.510366	-0.800279	-0.220454	0.00101783	0.0025059	-0.286297	-0.585895	0.0133023	0.0605083	0.416156	-0.433474	-0.809767	-0.057182	0.025126	0.143405	-0.52608	-0.848191	-0.203969	0.00209019	0.014785	-0.437862	-0.82499	-0.050733
ENSMUSG00000002265	18616	Peg3	protein_coding	MGI Symbol	4	Paternally-expressed 3 protein [Source:UniProtKB/Swiss-Prot;Acc:Q3URU2]	-0.802492	-1.13229	-0.472699	1.74089e-05	7.17061e-05	0.72274	0.436499	1.00898	9.80059e-06	0.00174357	-0.0482916	-0.417676	0.321093	0.792575	0.841495	-0.0641118	-0.313734	0.185511	0.605912	0.984983	0.524235	0.232602	0.815868	0.000821594	0.00206944	-0.0718002	-0.353049	0.209449	0.608073	0.918086	-0.636639	-1.03562	-0.237661	0.00257394	0.0382468	0.0667702	-0.295628	0.429168	0.711063	0.826655	-0.0314607	-0.435533	0.372612
ENSMUSG00000002279	76483	Lmf1	protein_coding	MGI Symbol	10	Lipase maturation factor 1 [Source:UniProtKB/Swiss-Prot;Acc:Q3U3R4]	-0.629489	-0.828384	-0.430594	1.72052e-07	1.30136e-06	0.0407919	-0.122367	0.203951	0.615482	0.837174	-0.703732	-0.918025	-0.489439	8.1407e-08	8.11164e-07	-0.176774	-0.330294	-0.0232531	0.0251846	0.726726	-0.881279	-1.05223	-0.710329	1.33947e-12	6.19064e-11	0.129999	-0.0447217	0.30472	0.140169	0.586462	0.000773077	-0.226332	0.227878	0.994534	0.997684	0.155813	-0.0466381	0.358264	0.12742	0.268427	0.115035	-0.127576	0.357645
ENSMUSG00000002280	67563	Narfl	protein_coding	MGI Symbol	6	Cytosolic Fe-S cluster assembly factor NARFL [Source:UniProtKB/Swiss-Prot;Acc:Q7TMW6]	-0.158905	-0.298989	-0.0188212	0.0272844	0.0475967	-0.0739527	-0.193567	0.0456615	0.21819	0.539064	-0.316168	-0.477295	-0.155041	0.000312349	0.00102359	0.0540816	-0.0582346	0.166398	0.335607	0.979326	-0.0967918	-0.220415	0.026831	0.121163	0.171447	-0.0513855	-0.177291	0.0745204	0.413599	0.829863	-0.165295	-0.334497	0.00390784	0.055249	0.224242	0.0373335	-0.109008	0.183675	0.608323	0.754161	0.0833105	-0.0935444	0.260165
ENSMUSG00000002289	57875	Angptl4	protein_coding	MGI Symbol	4	Angiopoietin-related protein 4 [Source:UniProtKB/Swiss-Prot;Acc:Q9Z1P8]	0.550185	0.232276	0.868095	0.00120691	0.00303585	0.111042	-0.155401	0.377485	0.403884	0.708179	0.163012	-0.178426	0.504449	0.339672	0.4292	-0.29104	-0.540812	-0.0412686	0.0236027	0.726726	-0.088526	-0.362713	0.185661	0.517061	0.588216	0.152709	-0.12784	0.433259	0.277216	0.744326	-0.0395023	-0.399186	0.320181	0.82514	0.924288	1.02495	0.710138	1.33977	9.71896e-08	2.68553e-05	0.498216	0.115261	0.881171
ENSMUSG00000002297	27214	Dbf4	protein_coding	MGI Symbol	9	A [Source:UniProtKB/Swiss-Prot;Acc:Q9QZ41]	0.304287	-0.086304	0.694877	0.122976	0.176591	-0.387837	-0.728002	-0.0476715	0.0265574	0.184834	0.0996232	-0.434572	0.633819	0.707707	0.77138	0.115093	-0.215484	0.445669	0.484986	0.983698	0.568733	0.179331	0.958134	0.00534842	0.0109558	-0.115441	-0.47475	0.243867	0.519103	0.887982	-0.354017	-0.926483	0.218449	0.218083	0.472829	0.0976855	-0.402886	0.598257	0.694833	0.815733	-0.183173	-0.750812	0.384465
ENSMUSG00000002307	13163	Daxx	protein_coding	MGI Symbol	9	Mus musculus Fas death domain-associated protein (Daxx), transcript variant 3, mRNA. [Source:RefSeq mRNA;Acc:NM_001355704]	-0.292774	-0.457884	-0.127664	0.000945711	0.00244223	0.00287845	-0.139732	0.145489	0.967601	0.988723	-0.316969	-0.50831	-0.125628	0.00183462	0.00488142	0.0138014	-0.119562	0.147165	0.835075	0.993002	0.0694423	-0.0791683	0.218053	0.349914	0.423912	-0.0312296	-0.181105	0.118646	0.675344	0.937083	-0.37261	-0.574874	-0.170346	0.000634017	0.0174435	-0.0896287	-0.265574	0.0863163	0.308718	0.486391	0.0270738	-0.181577	0.235724
ENSMUSG00000002308	54219	Cd320	protein_coding	MGI Symbol	3	CD320 antigen [Source:UniProtKB/Swiss-Prot;Acc:Q9Z1P5]	-0.638103	-0.951801	-0.324404	0.000203064	0.000625522	0.432817	0.148551	0.717084	0.00383684	0.0660862	-0.118747	-0.493555	0.25606	0.524894	0.611098	-0.0633594	-0.31392	0.187201	0.611465	0.985861	-0.345324	-0.608913	-0.0817347	0.0116379	0.0217908	0.0892708	-0.198387	0.376929	0.533369	0.892752	0.163217	-0.220422	0.546857	0.394251	0.645992	0.355385	0.035007	0.675764	0.0306481	0.100125	-0.0865378	-0.48413	0.311054
ENSMUSG00000002319	75751	Ipo4	protein_coding	MGI Symbol	13	Importin-4 [Source:UniProtKB/Swiss-Prot;Acc:Q8VI75]	-0.206528	-0.37601	-0.0370447	0.0182834	0.0334479	-0.0992805	-0.239043	0.040482	0.158485	0.463881	-0.339219	-0.523243	-0.155195	0.000629799	0.00189729	-0.00673709	-0.138196	0.124721	0.917863	0.998135	-0.298375	-0.444246	-0.152504	0.000189648	0.000560528	0.038583	-0.110638	0.187804	0.603499	0.917326	-0.0475813	-0.242163	0.147	0.623224	0.81011	-0.0834451	-0.256136	0.0892455	0.333931	0.51262	0.033411	-0.174088	0.24091
ENSMUSG00000002320	74140	Tm9sf1	protein_coding	MGI Symbol	13	Transmembrane 9 superfamily member 1 [Source:UniProtKB/Swiss-Prot;Acc:Q9DBU0]	-0.0830731	-0.242854	0.0767075	0.298988	0.377572	-0.0969844	-0.22861	0.0346415	0.143946	0.442153	0.00896408	-0.164981	0.182909	0.917408	0.938435	0.0123585	-0.111424	0.136141	0.840804	0.994343	-0.106969	-0.244374	0.0304357	0.12323	0.173975	0.0904051	-0.0501216	0.230932	0.200472	0.667913	0.128292	-0.0555965	0.31218	0.165854	0.40756	0.347593	0.185033	0.510153	0.000108032	0.00186075	-0.189022	-0.385137	0.0070938
ENSMUSG00000002324	56739	Rec8	protein_coding	MGI Symbol	4	Meiotic recombination [Source:UniProtKB/Swiss-Prot;Acc:Q8C5S7]	0.182172	-0.434997	0.799342	0.553457	0.62797	-0.410539	-0.956705	0.135626	0.136263	0.429839	1.2678	0.171389	2.36421	0.0246162	0.046618	-0.213018	-0.769541	0.343504	0.442967	0.983698	0.632357	-0.053649	1.31836	0.0697383	0.105681	-1.39423	-1.93042	-0.858037	6.10089e-06	0.00155058	0.422425	-0.745053	1.5899	0.468126	0.70675	0.264885	-0.644005	1.17378	0.558465	0.711825	-1.49617	-2.62962	-0.362712
ENSMUSG00000002325	16391	Irf9	protein_coding	MGI Symbol	7	Interferon regulatory factor 9 [Source:UniProtKB/Swiss-Prot;Acc:Q61179]	0.152479	-0.0793628	0.38432	0.190831	0.257676	0.0312331	-0.160585	0.223051	0.74334	0.896689	-0.208109	-0.461179	0.0449608	0.104123	0.160714	-0.0413846	-0.221755	0.138986	0.644755	0.988678	0.0933728	-0.107282	0.294028	0.351892	0.42587	0.0172649	-0.187493	0.222023	0.865286	0.978104	-0.342866	-0.610771	-0.0749613	0.0135392	0.102231	0.00128468	-0.236146	0.238715	0.991312	0.995144	0.391821	0.107215	0.676426
ENSMUSG00000002326	105446	Gmpr2	protein_coding	MGI Symbol	6	guanosine monophosphate reductase 2 [Source:MGI Symbol;Acc:MGI:1917903]	-0.17528	-0.326555	-0.0240049	0.0243433	0.0430307	0.0148913	-0.116283	0.146065	0.819356	0.928969	-0.147169	-0.327921	0.0335828	0.107471	0.164765	-0.0335071	-0.15644	0.0894258	0.584111	0.983698	-0.162802	-0.29708	-0.0285229	0.0188363	0.0332091	-0.075395	-0.213171	0.0623814	0.274701	0.743798	-0.0178745	-0.206526	0.170777	0.848819	0.935457	0.101247	-0.0581468	0.260642	0.206093	0.373638	-0.0132199	-0.209048	0.182609
ENSMUSG00000002329	67881	Mdp1	protein_coding	MGI Symbol	3	Magnesium-dependent phosphatase 1 [Source:UniProtKB/Swiss-Prot;Acc:Q9D967]	0.200805	-0.0234411	0.425051	0.0777368	0.118619	0.112474	-0.0740127	0.298961	0.229443	0.552833	0.158329	-0.110101	0.426758	0.239668	0.322312	0.000558503	-0.171836	0.172953	0.994798	0.999934	0.172158	-0.021478	0.365795	0.0797904	0.119039	0.126664	-0.070319	0.323648	0.200684	0.668449	-0.013271	-0.295812	0.26927	0.924698	0.969551	0.238643	-0.00210625	0.479392	0.0519349	0.143689	0.15495	-0.140961	0.450862
ENSMUSG00000002332	52585	Dhrs1	protein_coding	MGI Symbol	4	Dehydrogenase/reductase SDR family member 1 [Source:UniProtKB/Swiss-Prot;Acc:Q99L04]	-0.139915	-0.352495	0.0726652	0.190508	0.257427	0.0941415	-0.0799233	0.268206	0.280251	0.604879	-0.295085	-0.522367	-0.0678026	0.0123453	0.0257143	-0.123129	-0.287027	0.0407698	0.136478	0.9248	-0.0719729	-0.252702	0.108756	0.424907	0.499482	0.218378	0.0338483	0.402907	0.0216478	0.243561	-0.346241	-0.585944	-0.106538	0.00582286	0.0608555	0.108771	-0.104381	0.321924	0.307889	0.485497	0.249311	-0.00865962	0.507282
ENSMUSG00000002342	234371	Tmem161a	protein_coding	MGI Symbol	14	Transmembrane protein 161A [Source:UniProtKB/Swiss-Prot;Acc:Q8VCA6]	-0.538101	-0.702596	-0.373607	8.81735e-08	7.34516e-07	-0.000905198	-0.142515	0.140705	0.989737	0.99664	-0.611176	-0.795375	-0.426977	6.57575e-08	6.78311e-07	0.00387341	-0.128819	0.136566	0.953157	0.998763	-0.470834	-0.614496	-0.327173	8.48403e-08	6.48512e-07	-0.0199807	-0.169581	0.12962	0.788204	0.960898	-0.136468	-0.328719	0.0557831	0.158775	0.398574	0.143262	-0.0250152	0.311539	0.0928808	0.21452	0.0721695	-0.130152	0.274491
ENSMUSG00000002343	76813	Armc6	protein_coding	MGI Symbol	6	Armadillo repeat-containing protein 6 [Source:UniProtKB/Swiss-Prot;Acc:Q8BNU0]	-0.228289	-0.531694	0.0751168	0.135886	0.192598	-0.00351211	-0.276394	0.26937	0.979337	0.99273	-0.261785	-0.63612	0.11255	0.164868	0.236721	-0.0308679	-0.286812	0.225076	0.80831	0.992101	-0.470785	-0.734834	-0.206736	0.000894084	0.00223469	0.157036	-0.138524	0.452595	0.288676	0.750859	0.178132	-0.201791	0.558055	0.348299	0.606674	0.739377	0.400909	1.07785	8.14207e-05	0.0015347	0.0299843	-0.367152	0.42712
ENSMUSG00000002345	72368	Borcs8	protein_coding	MGI Symbol	5	BLOC-1-related complex subunit 8 [Source:UniProtKB/Swiss-Prot;Acc:Q9D6Y4]	-0.597229	-0.795239	-0.39922	4.39939e-07	2.91951e-06	-0.103225	-0.278259	0.0718083	0.239736	0.5661	-0.887147	-1.10929	-0.665	1.03211e-09	2.19378e-08	0.0136531	-0.151593	0.178899	0.867969	0.997304	-0.650962	-0.825592	-0.476331	5.18579e-09	5.86486e-08	0.0457995	-0.141119	0.232718	0.622527	0.923736	-0.222532	-0.451745	0.00668122	0.0567013	0.227387	-0.307882	-0.504789	-0.110975	0.00306997	0.019679	0.186692	-0.0539744	0.427358
ENSMUSG00000002346	73095	Slc25a42	protein_coding	MGI Symbol	5	Mitochondrial coenzyme A transporter SLC25A42 [Source:UniProtKB/Swiss-Prot;Acc:Q8R0Y8]	-0.623223	-0.8816	-0.364845	1.98837e-05	8.03953e-05	0.214883	0.00633552	0.423431	0.0437616	0.244865	-0.818358	-1.09801	-0.53871	7.76171e-07	5.49326e-06	-0.107763	-0.304947	0.0894203	0.275319	0.970321	-0.697436	-0.919607	-0.475265	2.02355e-07	1.36589e-06	0.137467	-0.0853138	0.360248	0.219073	0.688901	-0.228686	-0.52648	0.0691085	0.128237	0.351725	0.365233	0.101491	0.628975	0.00795048	0.0384125	0.410019	0.0914762	0.728563
ENSMUSG00000002365	66616	Snx9	protein_coding	MGI Symbol	1	sorting nexin 9 [Source:MGI Symbol;Acc:MGI:1913866]	0.248377	0.0678401	0.428914	0.0083304	0.0168568	-0.000440987	-0.14985	0.148968	0.995261	0.998567	0.193568	-0.00886867	0.396005	0.0603567	0.100999	-0.0244813	-0.164937	0.115974	0.725988	0.990955	-0.014065	-0.170181	0.142051	0.85616	0.885338	0.0163023	-0.143057	0.175662	0.836942	0.971307	0.183152	-0.0304487	0.396753	0.0906485	0.294239	-0.179559	-0.363843	0.0047256	0.0558562	0.150739	0.054368	-0.172019	0.280755
ENSMUSG00000002372	71810	Ranbp3	protein_coding	MGI Symbol	1	Ran-binding protein 3 [Source:UniProtKB/Swiss-Prot;Acc:Q9CT10]	-0.513628	-0.67675	-0.350506	1.90543e-07	1.42217e-06	-0.141126	-0.278031	-0.00422187	0.0436728	0.244685	-0.614814	-0.794614	-0.435014	3.48853e-08	4.01645e-07	0.00301493	-0.12611	0.13214	0.962524	0.998763	-0.506194	-0.647789	-0.364598	1.3279e-08	1.30746e-07	-0.0267896	-0.172844	0.119265	0.712294	0.945818	-0.105606	-0.29456	0.0833491	0.264764	0.525603	0.361477	0.193949	0.529005	9.5923e-05	0.0017112	-0.0399404	-0.240425	0.160544
ENSMUSG00000002379	69875	Ndufa11	protein_coding	MGI Symbol	1		-0.742733	-0.964744	-0.520722	5.53734e-08	4.91211e-07	-0.0373188	-0.22003	0.145393	0.681395	0.868452	-0.822783	-1.0622	-0.58337	3.13324e-08	3.65273e-07	-0.007432	-0.179261	0.164397	0.930643	0.998763	-0.763001	-0.953449	-0.572552	9.55592e-10	1.4232e-08	-0.0277971	-0.222603	0.167009	0.774119	0.959863	-0.0672139	-0.320323	0.185895	0.593781	0.791717	0.169902	-0.0551928	0.394996	0.134689	0.278226	0.0427308	-0.227868	0.31333
ENSMUSG00000002393	13864	Nr2f6	protein_coding	MGI Symbol	8	Nuclear receptor subfamily 2 group F member 6 [Source:UniProtKB/Swiss-Prot;Acc:P43136]	-0.431717	-0.67394	-0.189493	0.000897381	0.00233319	0.0586954	-0.139469	0.25686	0.552091	0.7996	-0.516268	-0.776769	-0.255768	0.000277883	0.000921806	-0.0579205	-0.244371	0.12853	0.532959	0.983698	-0.423238	-0.630818	-0.215658	0.000197293	0.000580087	0.0977825	-0.11383	0.309395	0.355233	0.791917	-0.150951	-0.426969	0.125068	0.274996	0.536405	0.618671	0.373576	0.863767	9.84598e-06	0.000381701	0.143247	-0.152157	0.438651
ENSMUSG00000002395	67023	Use1	protein_coding	MGI Symbol	12	unconventional SNARE in the ER 1 homolog (S. cerevisiae) [Source:MGI Symbol;Acc:MGI:1914273]	-0.378885	-0.606599	-0.151172	0.00176097	0.00425325	0.0120844	-0.17913	0.203298	0.898809	0.963848	-0.378164	-0.630862	-0.125466	0.00441488	0.0104858	0.046931	-0.132266	0.226128	0.598855	0.984262	-0.31547	-0.51263	-0.118309	0.00251238	0.00560238	-0.00869632	-0.21128	0.193887	0.931163	0.990508	-0.0157637	-0.281503	0.249975	0.904987	0.962419	0.0501358	-0.182161	0.282432	0.664453	0.794956	0.0113632	-0.269967	0.292694
ENSMUSG00000002396	77090	Ocel1	protein_coding	MGI Symbol	4	occludin/ELL domain containing 1 [Source:MGI Symbol;Acc:MGI:1924340]	-0.680881	-0.906034	-0.455729	4.18437e-07	2.8084e-06	0.240957	0.0458196	0.436095	0.0168965	0.145244	-0.454837	-0.706894	-0.20278	0.000789357	0.00231251	-0.112802	-0.293318	0.0677146	0.213398	0.950593	-0.338151	-0.535463	-0.140838	0.00132838	0.00318296	-0.0616927	-0.265995	0.14261	0.54441	0.896967	-0.229488	-0.493834	0.0348577	0.0868493	0.28788	0.309013	0.0736639	0.544361	0.0114684	0.0496467	0.0149132	-0.261036	0.290862
ENSMUSG00000002409	13549	Dyrk1b	protein_coding	MGI Symbol	3	Dual specificity tyrosine-phosphorylation-regulated kinase 1B [Source:UniProtKB/Swiss-Prot;Acc:Q9Z188]	-0.895559	-1.19007	-0.601042	3.76566e-07	2.55777e-06	0.192412	-0.0618016	0.446625	0.133645	0.425114	-0.941678	-1.26132	-0.622032	6.85603e-07	4.93839e-06	0.013489	-0.221257	0.248235	0.907949	0.998135	-0.487383	-0.741806	-0.232961	0.000411832	0.0011201	-0.0262638	-0.290814	0.238287	0.841691	0.972945	-0.440806	-0.775169	-0.106443	0.0111636	0.0912053	-0.304151	-0.598081	-0.0102218	0.0429177	0.12596	0.238531	-0.114016	0.591078
ENSMUSG00000002413	109880	Braf	protein_coding	MGI Symbol	5	Serine/threonine-protein kinase B-raf [Source:UniProtKB/Swiss-Prot;Acc:P28028]	0.644711	0.47661	0.812811	2.68803e-09	3.86594e-08	0.0451157	-0.092276	0.182507	0.509983	0.77435	0.720949	0.524569	0.91733	7.33402e-09	1.09228e-07	-0.00739028	-0.13641	0.121629	0.908238	0.998135	0.569121	0.422766	0.715477	1.9443e-09	2.57097e-08	0.108838	-0.0377743	0.255449	0.141045	0.587698	0.144438	-0.0637431	0.352619	0.168144	0.410711	-0.0259127	-0.201083	0.149258	0.766076	0.860122	-0.0311231	-0.25009	0.187844
ENSMUSG00000002416	68198	Ndufb2	protein_coding	MGI Symbol	6	NADH dehydrogenase [ubiquinone] 1 beta subcomplex subunit 2, mitochondrial [Source:UniProtKB/Swiss-Prot;Acc:Q9CPU2]	0.275984	0.0545192	0.497449	0.0159831	0.0298143	-0.149227	-0.336077	0.037624	0.114123	0.394809	0.296845	0.0108653	0.582825	0.0423094	0.074223	0.0105764	-0.166947	0.1881	0.904577	0.998135	-0.0375103	-0.232103	0.157082	0.698371	0.751616	0.0652665	-0.136	0.266533	0.515241	0.887038	0.344932	0.0480542	0.64181	0.0239805	0.140032	0.350856	0.108985	0.592727	0.00563724	0.0297422	-0.170088	-0.479794	0.139619
ENSMUSG00000002428	20585	Hltf	protein_coding	MGI Symbol	6	Helicase-like transcription factor [Source:UniProtKB/Swiss-Prot;Acc:Q6PCN7]	0.84768	0.64001	1.05535	6.07847e-10	1.12612e-08	0.0529713	-0.108215	0.214158	0.509649	0.77435	1.09802	0.821212	1.37484	1.21311e-09	2.52478e-08	0.029187	-0.12059	0.178964	0.695245	0.989603	0.823678	0.642032	1.00532	4.28132e-11	1.06721e-09	0.0124083	-0.156319	0.181136	0.882366	0.981001	0.303533	0.00825844	0.598808	0.0442304	0.198486	-0.287664	-0.508904	-0.0664226	0.0122279	0.0521866	-0.197374	-0.503594	0.108847
ENSMUSG00000002455	68879	Prpf6	protein_coding	MGI Symbol	4	Pre-mRNA-processing factor 6 [Source:UniProtKB/Swiss-Prot;Acc:Q91YR7]	0.143187	-0.0911631	0.377538	0.223536	0.295146	-0.175279	-0.368402	0.0178434	0.0739571	0.322851	0.00580393	-0.247141	0.258749	0.963171	0.973743	0.0323517	-0.149026	0.213729	0.719872	0.990955	0.122624	-0.0784556	0.323703	0.224405	0.29133	-0.072528	-0.278888	0.133831	0.480876	0.870053	-0.0844683	-0.351894	0.182957	0.526151	0.746775	-0.149217	-0.387014	0.0885814	0.211533	0.380022	-0.0378956	-0.323562	0.247771
ENSMUSG00000002458	56470	Rgs19	protein_coding	MGI Symbol	12	regulator of G-protein signaling 19 [Source:MGI Symbol;Acc:MGI:1915153]	-0.295975	-0.738524	0.146574	0.183616	0.249542	0.069036	-0.33265	0.470722	0.729657	0.891466	-0.831011	-1.31886	-0.343161	0.00140888	0.00387077	0.231947	-0.128135	0.592029	0.199912	0.944227	-0.082778	-0.458743	0.293187	0.658135	0.716461	0.366322	-0.0502175	0.782863	0.0829765	0.471496	-0.516286	-1.01597	-0.0165984	0.0432152	0.195894	-0.491338	-0.905016	-0.0776603	0.0212079	0.076742	0.604072	0.0820605	1.12608
ENSMUSG00000002475	106861	Abhd3	protein_coding	MGI Symbol	4	abhydrolase domain containing 3 [Source:MGI Symbol;Acc:MGI:2147183]	0.211922	-0.00631418	0.430158	0.056649	0.0901704	0.0464481	-0.13404	0.226936	0.605195	0.831564	0.261405	0.0210647	0.501746	0.0338394	0.0613189	-0.00560146	-0.175411	0.164208	0.947075	0.998763	0.0129101	-0.175558	0.201379	0.890373	0.912722	0.065113	-0.127672	0.257898	0.498049	0.878588	0.242894	-0.0109737	0.496761	0.0602075	0.234776	0.634721	0.410253	0.85919	1.44971e-06	0.00013211	-0.00303539	-0.272877	0.266807
ENSMUSG00000002477	20641	Snrpd1	protein_coding	MGI Symbol	1	Small nuclear ribonucleoprotein Sm D1 [Source:UniProtKB/Swiss-Prot;Acc:P62315]	-0.0497317	-0.372429	0.272966	0.756612	0.808668	0.157029	-0.12011	0.434168	0.258338	0.585197	-0.053133	-0.440051	0.333784	0.782389	0.833201	0.043392	-0.209208	0.295992	0.729784	0.990955	0.322862	0.0354802	0.610245	0.0287024	0.0481587	-0.156423	-0.433503	0.120656	0.260046	0.730683	-0.332604	-0.743075	0.0778681	0.109111	0.324483	-0.803277	-1.12335	-0.483199	1.07903e-05	0.000402682	0.16043	-0.260322	0.581183
ENSMUSG00000002486	77832	Tchp	protein_coding	MGI Symbol	8	Trichoplein keratin filament-binding protein [Source:UniProtKB/Swiss-Prot;Acc:Q3TVW5]	-0.399701	-0.651628	-0.147775	0.00270625	0.00621944	0.00368352	-0.227516	0.234882	0.974423	0.991447	-0.528021	-0.829059	-0.226984	0.00105594	0.00301463	-0.181728	-0.402717	0.03926	0.104121	0.906616	-0.477904	-0.709319	-0.246488	0.000168422	0.000504449	-0.391301	-0.631218	-0.151385	0.0021164	0.0681177	-0.231846	-0.540619	0.076927	0.136675	0.364457	-0.147762	-0.403631	0.108107	0.249461	0.422668	0.132004	-0.185231	0.449238
ENSMUSG00000002489	21844	Tiam1	protein_coding	MGI Symbol	15	T cell lymphoma invasion and metastasis 1 [Source:MGI Symbol;Acc:MGI:103306]	0.778556	0.178215	1.3789	0.012436	0.0239446	0.607294	0.165995	1.04859	0.00831398	0.10075	1.12319	0.392246	1.85414	0.00355568	0.00868941	-0.364274	-0.757885	0.0293359	0.0686798	0.833924	0.872431	0.361307	1.38355	0.00138141	0.00329604	-0.023258	-0.483854	0.437339	0.919067	0.98753	-0.113514	-0.913889	0.686861	0.775451	0.899021	0.242672	-0.444229	0.929574	0.478621	0.648566	0.262658	-0.57397	1.09929
ENSMUSG00000002496	22084	Tsc2	protein_coding	MGI Symbol	22	tuberous sclerosis 2 [Source:MGI Symbol;Acc:MGI:102548]	-0.339138	-0.500075	-0.1782	0.000130459	0.000421777	-0.10776	-0.238666	0.0231469	0.103782	0.37638	-0.510964	-0.682654	-0.339275	5.66789e-07	4.19438e-06	-0.0426442	-0.165544	0.0802551	0.486448	0.983698	-0.3772	-0.514218	-0.240182	2.32623e-06	1.1396e-05	-0.0624708	-0.202252	0.0773104	0.371065	0.802574	-0.176409	-0.358472	0.00565473	0.0571665	0.227783	-0.124585	-0.288004	0.0388339	0.130941	0.27309	0.0640672	-0.131488	0.259622
ENSMUSG00000002504	65962	Slc9a3r2	protein_coding	MGI Symbol	2	solute carrier family 9 (sodium/hydrogen exchanger), member 3 regulator 2 [Source:MGI Symbol;Acc:MGI:1890662]	-0.0581893	-0.248105	0.131727	0.538554	0.614712	0.0131522	-0.146237	0.172542	0.868138	0.950874	-0.209213	-0.42333	0.00490417	0.0552036	0.0935572	0.000473283	-0.148969	0.149916	0.994915	0.999934	0.017637	-0.148801	0.184075	0.831184	0.864821	0.017915	-0.151289	0.187119	0.831324	0.969372	-0.226377	-0.452683	-6.97574e-05	0.049933	0.213059	0.0357879	-0.16192	0.233496	0.7159	0.829976	0.164176	-0.0735407	0.401892
ENSMUSG00000002524	67959	Puf60	protein_coding	MGI Symbol	11	Poly(U)-binding-splicing factor PUF60 [Source:UniProtKB/Swiss-Prot;Acc:Q3UEB3]	-0.631573	-0.783868	-0.479278	4.12264e-10	8.36574e-09	-0.059541	-0.18257	0.0634876	0.333186	0.653639	-0.553869	-0.715516	-0.392222	3.34018e-08	3.86967e-07	0.0781579	-0.0376801	0.193996	0.179857	0.93701	-0.292821	-0.421911	-0.163731	4.85825e-05	0.000168656	-0.0428276	-0.174733	0.0890779	0.51472	0.886802	-0.182889	-0.354282	-0.0114962	0.0371463	0.179138	0.197436	0.044807	0.350065	0.0126421	0.053323	-0.137246	-0.322145	0.0476527
ENSMUSG00000002546	99412	Golga2	protein_coding	MGI Symbol	11	golgi autoantigen, golgin subfamily a, 2 [Source:MGI Symbol;Acc:MGI:2139395]	-0.341438	-0.47227	-0.210606	5.74667e-06	2.71982e-05	-0.0465301	-0.153724	0.0606633	0.384823	0.692612	-0.38671	-0.52745	-0.245971	2.40439e-06	1.47257e-05	0.0699162	-0.0309545	0.170787	0.168552	0.935182	-0.114232	-0.226245	-0.00221791	0.0458518	0.07277	-0.0483819	-0.163053	0.0662893	0.398143	0.822783	-0.202563	-0.351492	-0.0536332	0.00902748	0.0809109	-0.16514	-0.297962	-0.0323174	0.0162087	0.0634045	-0.0012576	-0.160739	0.158224
ENSMUSG00000002550	22245	Uck1	protein_coding	MGI Symbol	5	uridine-cytidine kinase 1 [Source:MGI Symbol;Acc:MGI:98904]	-0.322775	-0.648157	0.00260633	0.051769	0.0833259	0.180703	-0.103029	0.464434	0.204923	0.521523	-0.307801	-0.682895	0.0672924	0.104832	0.161425	-0.0653468	-0.326939	0.196246	0.615778	0.98603	-1.15182	-1.41948	-0.884168	1.63799e-10	3.24772e-09	-0.0343299	-0.329612	0.260953	0.81508	0.967538	0.778674	0.399328	1.15802	0.000181584	0.00877094	0.451058	0.146897	0.755219	0.00474679	0.0264805	0.165729	-0.241782	0.57324
ENSMUSG00000002578	22781	Ikzf4	protein_coding	MGI Symbol	8	Mus musculus IKAROS family zinc finger 4 (Ikzf4), transcript variant 3, mRNA. [Source:RefSeq mRNA;Acc:NM_001358537]	-2.41189	-3.4364	-1.38738	2.85248e-05	0.000110775	-0.58752	-1.80708	0.632038	0.335373	0.655628	-2.36302	-3.63514	-1.0909	0.000579615	0.00176352	1.17222	0.0856627	2.25878	0.0352217	0.781221	0.00239921	-1.00075	1.00555	0.99616	0.997389	0.366977	-0.73793	1.47188	0.505178	0.882996	-1.1932	-2.39486	0.00846233	0.0515524	0.21646	-1.85634	-2.80268	-0.910012	0.000313493	0.00389601	-0.636388	-1.72294	0.450159
ENSMUSG00000002580	103742	Mien1	protein_coding	MGI Symbol	1	Migration and invasion enhancer 1 [Source:UniProtKB/Swiss-Prot;Acc:Q9CQ86]	-0.394666	-0.62157	-0.167763	0.00114829	0.00290528	0.0485972	-0.146063	0.243257	0.615992	0.837246	-0.391137	-0.648504	-0.133769	0.00389565	0.00940911	0.0144636	-0.167102	0.196029	0.87266	0.997304	-0.380617	-0.577781	-0.183453	0.000377267	0.00103519	0.0408062	-0.164656	0.246269	0.689715	0.941025	0.00394391	-0.264656	0.272544	0.976427	0.990073	0.0698281	-0.16104	0.300696	0.543757	0.699117	0.0450676	-0.237476	0.327611
ENSMUSG00000002588	18979	Pon1	protein_coding	MGI Symbol	4	paraoxonase 1 [Source:MGI Symbol;Acc:MGI:103295]	0.31264	-0.0359196	0.6612	0.0772669	0.118041	0.101412	-0.188501	0.391325	0.482942	0.760661	-0.0273447	-0.40112	0.346431	0.882973	0.913457	-0.162484	-0.435265	0.110297	0.235144	0.952561	-0.17234	-0.473851	0.129171	0.254248	0.323559	0.520132	0.216816	0.823448	0.00132058	0.0512698	-0.0174887	-0.41272	0.377743	0.929048	0.970992	0.701382	0.35224	1.05052	0.000236347	0.00322595	0.441396	0.0205015	0.862291
ENSMUSG00000002602	26362	Axl	protein_coding	MGI Symbol	8	AXL receptor tyrosine kinase [Source:MGI Symbol;Acc:MGI:1347244]	0.0547584	-0.327382	0.436899	0.773192	0.821386	0.18532	-0.131545	0.502185	0.243584	0.570295	0.131422	-0.296244	0.559088	0.53736	0.622209	0.158268	-0.137486	0.454022	0.285279	0.972171	0.435685	0.103933	0.767438	0.0114519	0.0214922	0.159286	-0.17614	0.494711	0.342227	0.784167	-0.145995	-0.599302	0.307312	0.518095	0.742495	-0.285693	-0.677929	0.106542	0.148465	0.298055	0.108656	-0.369387	0.5867
ENSMUSG00000002603	21803	Tgfb1	protein_coding	MGI Symbol	5	transforming growth factor, beta 1 [Source:MGI Symbol;Acc:MGI:98725]	-0.18771	-0.567078	0.191659	0.322615	0.402904	-0.00876064	-0.334735	0.317214	0.956869	0.985602	-0.364704	-0.799613	0.0702039	0.097698	0.152305	0.0750158	-0.228791	0.378823	0.619847	0.98603	0.0755767	-0.261721	0.412875	0.652504	0.711748	0.0602398	-0.282412	0.402891	0.723722	0.947191	-0.365265	-0.824195	0.0936643	0.115326	0.332178	-0.514631	-0.902702	-0.126561	0.0107332	0.047332	0.168234	-0.308008	0.644476
ENSMUSG00000002608	52132	Ccdc97	protein_coding	MGI Symbol	9	Coiled-coil domain-containing protein 97 [Source:UniProtKB/Swiss-Prot;Acc:Q9DBT3]	-0.73505	-0.95921	-0.51089	8.39191e-08	7.04498e-07	-0.0150614	-0.200315	0.170192	0.870061	0.951673	-0.967267	-1.20946	-0.725076	1.03018e-09	2.19327e-08	-0.0515831	-0.225838	0.122672	0.552326	0.983698	-0.517815	-0.710378	-0.325253	3.48285e-06	1.61889e-05	0.0343965	-0.163469	0.232262	0.726683	0.947576	-0.501034	-0.756713	-0.245356	0.000317243	0.0123354	-0.27805	-0.505567	-0.0505327	0.0179733	0.0682911	0.217156	-0.0559469	0.490258
ENSMUSG00000002617	22700	Zfp40	protein_coding	MGI Symbol	6	zinc finger protein 40 [Source:MGI Symbol;Acc:MGI:99185]	0.535746	0.0493319	1.02216	0.0317739	0.0543387	0.142106	-0.241091	0.525303	0.457193	0.745082	0.569841	-0.0395252	1.17921	0.0659606	0.108889	0.0809904	-0.265279	0.42726	0.638369	0.988678	0.490904	0.0874439	0.894363	0.018447	0.0326081	0.0509162	-0.336667	0.438499	0.791595	0.962137	0.159928	-0.48366	0.803515	0.617624	0.806787	-0.0358245	-0.538259	0.46661	0.885921	0.935403	0.108012	-0.571021	0.787044
ENSMUSG00000002625	54194	Akap8l	protein_coding	MGI Symbol	1	A-kinase anchoring protein 8 like [Source:HGNC Symbol;Acc:HGNC:29857]	-0.235017	-0.436936	-0.0330983	0.023749	0.0421006	-0.122211	-0.292185	0.0477636	0.153614	0.456529	-0.353408	-0.579893	-0.126923	0.0031239	0.0077572	0.0596055	-0.100353	0.219564	0.455042	0.983698	-0.236787	-0.412761	-0.0608131	0.00972391	0.0186618	0.0275793	-0.153299	0.208458	0.759115	0.957358	-0.0570155	-0.295082	0.181051	0.630376	0.814515	0.0282394	-0.179172	0.235651	0.784198	0.872473	-0.00381997	-0.255167	0.247527
ENSMUSG00000002635	68079	Pdcd2l	protein_coding	MGI Symbol	4	Programmed cell death protein 2-like [Source:UniProtKB/Swiss-Prot;Acc:Q8C5N5]	-0.150638	-0.372713	0.0714371	0.1776	0.242584	0.0756382	-0.118538	0.269814	0.43501	0.730945	0.119999	-0.162011	0.402008	0.394175	0.484358	0.0867496	-0.0913693	0.264869	0.330167	0.97665	0.0756632	-0.120027	0.271353	0.438393	0.513151	0.154223	-0.0483566	0.356802	0.131466	0.575026	0.131085	-0.162339	0.424509	0.371251	0.626811	0.24637	0.00298758	0.489752	0.0473914	0.134559	-0.194998	-0.496896	0.1069
ENSMUSG00000002658	98053	Gtf2f1	protein_coding	MGI Symbol	1	ral transcription factor IIF subunit 1 [Source:UniProtKB/Swiss-Prot;Acc:Q3THK3]	-0.509261	-0.718191	-0.300331	1.69631e-05	7.01591e-05	0.0202815	-0.155647	0.19621	0.816607	0.928	-0.798763	-1.02683	-0.570699	2.08227e-08	2.57548e-07	0.0197535	-0.145151	0.184658	0.809581	0.992101	-0.27413	-0.455686	-0.0925739	0.00410849	0.00868299	0.0156989	-0.170995	0.202393	0.865649	0.978104	-0.50488	-0.74526	-0.2645	0.000136065	0.00762624	-0.276401	-0.488978	-0.0638235	0.0122273	0.0521866	0.309784	0.0553931	0.564175
ENSMUSG00000002660	53895	Clpp	protein_coding	MGI Symbol	1	ATP-dependent Clp protease proteolytic subunit, mitochondrial [Source:UniProtKB/Swiss-Prot;Acc:O88696]	-0.741158	-0.895691	-0.586624	9.69639e-12	4.58512e-10	-0.0871516	-0.214426	0.0401232	0.173625	0.486487	-0.913855	-1.08056	-0.747151	2.34827e-13	4.29534e-11	-0.0242934	-0.144084	0.0954972	0.68353	0.988924	-0.83549	-0.968149	-0.702831	3.86856e-15	7.17729e-13	-0.0241485	-0.159965	0.111668	0.720719	0.946104	-0.102658	-0.278836	0.0735193	0.245296	0.503581	-0.0568499	-0.213982	0.100282	0.468164	0.639668	0.0855453	-0.102794	0.273884
ENSMUSG00000002661	66400	Alkbh7	protein_coding	MGI Symbol	3	Alpha-ketoglutarate-dependent dioxygenase alkB homolog 7, mitochondrial [Source:UniProtKB/Swiss-Prot;Acc:Q9D6Z0]	-0.486111	-0.78609	-0.186133	0.00224365	0.00526436	0.365923	0.101708	0.630139	0.00794526	0.0980847	0.163182	-0.20663	0.532994	0.377091	0.46761	-0.038602	-0.275219	0.198015	0.742863	0.990955	-0.0737995	-0.332575	0.184976	0.566896	0.634515	0.0100035	-0.257689	0.277696	0.940056	0.992311	0.198379	-0.185988	0.582747	0.302482	0.564578	0.496216	0.167572	0.82486	0.00410853	0.0240565	-0.28337	-0.679524	0.112784
ENSMUSG00000002668	70785	Dennd1c	protein_coding	MGI Symbol	1	DENN domain-containing protein 1C [Source:UniProtKB/Swiss-Prot;Acc:Q8CFK6]	0.132157	-0.168618	0.432933	0.379092	0.461369	0.137659	-0.116617	0.391935	0.279784	0.604565	0.34067	-0.0467289	0.72807	0.0829978	0.132517	-0.0874214	-0.322718	0.147875	0.456359	0.983698	0.200889	-0.0667981	0.468577	0.136878	0.190324	-0.12025	-0.382914	0.142414	0.359651	0.794798	0.0523595	-0.355526	0.460245	0.796244	0.910684	0.0710666	-0.25905	0.401184	0.665254	0.795401	-0.0708541	-0.490244	0.348536
ENSMUSG00000002679	69792	Med6	protein_coding	MGI Symbol	6	Mus musculus mediator complex subunit 6 (Med6), transcript variant 1, mRNA. [Source:RefSeq mRNA;Acc:NM_001347384]	0.430891	0.180678	0.681104	0.00126706	0.00316997	-0.00678861	-0.211191	0.197614	0.946714	0.981713	0.71002	0.370292	1.04975	0.000144906	0.000521011	0.142409	-0.0457475	0.330565	0.133658	0.9248	0.589429	0.369625	0.809234	3.65107e-06	1.68802e-05	-0.0465566	-0.253392	0.160278	0.651023	0.931616	0.262999	-0.0952276	0.621225	0.145351	0.377553	0.183787	-0.101342	0.468916	0.199623	0.365295	-0.285917	-0.655026	0.0831919
ENSMUSG00000002699	16822	Lcp2	protein_coding	MGI Symbol	4	Lymphocyte cytosolic protein 2 [Source:UniProtKB/Swiss-Prot;Acc:Q60787]	0.274067	-0.203705	0.751839	0.25258	0.326784	0.0675328	-0.331418	0.466484	0.733569	0.892864	0.0613046	-0.511417	0.634027	0.829502	0.871158	0.074399	-0.292303	0.441101	0.683401	0.988924	0.42914	0.00599633	0.852284	0.0469993	0.0744275	0.0418148	-0.369655	0.453285	0.838003	0.971469	-0.293437	-0.903838	0.316965	0.336386	0.597774	-0.471738	-0.963132	0.0196563	0.0593882	0.157371	0.280295	-0.349875	0.910466
ENSMUSG00000002718	110750	Cse1l	protein_coding	MGI Symbol	12	Exportin-2 [Source:UniProtKB/Swiss-Prot;Acc:Q9ERK4]	0.570141	0.389925	0.750357	1.73444e-07	1.31012e-06	-0.00951396	-0.157725	0.138697	0.897227	0.963297	0.773146	0.562365	0.983928	7.47957e-09	1.11014e-07	-0.0251045	-0.164476	0.114267	0.717231	0.990955	0.379646	0.223209	0.536083	1.81299e-05	6.99919e-05	0.0559555	-0.102294	0.214205	0.478243	0.86813	0.368396	0.145961	0.59083	0.00183839	0.031876	-0.13295	-0.318402	0.0525024	0.154786	0.306949	-0.21252	-0.446913	0.0218738
ENSMUSG00000002728	67877	Naa20	protein_coding	MGI Symbol	9	N-alpha-acetyltransferase 20 [Source:UniProtKB/Swiss-Prot;Acc:P61600]	0.00660622	-0.279462	0.292675	0.962934	0.972066	0.0300437	-0.21727	0.277357	0.806946	0.923192	0.272033	-0.100712	0.644777	0.147688	0.215751	-0.0958288	-0.328626	0.136968	0.409626	0.983698	0.254261	-0.013608	0.52213	0.0621703	0.0954945	-0.258639	-0.513818	-0.00345955	0.0471259	0.363867	-0.0780572	-0.473655	0.317541	0.691625	0.854644	-0.477273	-0.783977	-0.170569	0.0031976	0.0202276	-0.235383	-0.634894	0.164129
ENSMUSG00000002731	23992	Prkra	protein_coding	MGI Symbol	2	Interferon-inducible double-stranded RNA-dependent protein kinase activator A [Source:UniProtKB/Swiss-Prot;Acc:Q9WTX2]	0.117978	-0.107697	0.343652	0.296378	0.374787	-0.111763	-0.303894	0.0803689	0.246091	0.572859	0.088896	-0.189805	0.367597	0.52211	0.608557	0.16971	-0.00947961	0.348899	0.0627247	0.832028	0.101409	-0.0962106	0.299028	0.305231	0.378068	-0.160229	-0.356343	0.0358856	0.106303	0.527965	0.157197	-0.133696	0.44809	0.280642	0.541916	-0.0328243	-0.268586	0.202937	0.779454	0.869304	-0.0826811	-0.385483	0.22012
ENSMUSG00000002732	14231	Fkbp7	protein_coding	MGI Symbol	4	Mus musculus FK506 binding protein 7 (Fkbp7), transcript variant 2, mRNA. [Source:RefSeq mRNA;Acc:NM_001355079]	0.372979	0.0481585	0.697799	0.0255664	0.0449054	-0.0409314	-0.309134	0.227271	0.758901	0.903626	0.62164	0.176122	1.06716	0.00752951	0.0167585	0.11723	-0.130834	0.365294	0.34454	0.979365	0.972481	0.657407	1.28756	2.82111e-07	1.82006e-06	0.114923	-0.164293	0.394138	0.409682	0.828229	-0.233612	-0.719639	0.252415	0.336456	0.597774	-0.537552	-0.918203	-0.156902	0.00689671	0.0344623	-0.289592	-0.77132	0.192135
ENSMUSG00000002733	83435	Plekha3	protein_coding	MGI Symbol	2	Pleckstrin homology domain-containing family A member 3 [Source:UniProtKB/Swiss-Prot;Acc:Q9ERS4]	0.148599	0.00534547	0.291853	0.0424371	0.069976	-0.0051605	-0.124739	0.114418	0.930797	0.975095	0.0766814	-0.0903817	0.243745	0.358419	0.448784	-0.03527	-0.147633	0.077093	0.528713	0.983698	0.00725902	-0.118059	0.132577	0.907211	0.926181	-0.0284059	-0.155408	0.0985967	0.653084	0.931918	0.0341524	-0.141885	0.21019	0.696526	0.8578	-0.147933	-0.295272	-0.000594263	0.0491294	0.138015	0.0667574	-0.117993	0.251508
ENSMUSG00000002741	56418	Ykt6	protein_coding	MGI Symbol	2	YKT6 v-SNARE homolog (S. cerevisiae) [Source:MGI Symbol;Acc:MGI:1927550]	0.234632	0.115414	0.35385	0.000301626	0.00088665	-0.0553337	-0.153839	0.0431715	0.262385	0.5886	0.126542	-0.00271483	0.255798	0.0547545	0.0929053	-0.070777	-0.163337	0.0217834	0.129823	0.9248	0.0074579	-0.0951487	0.110065	0.883725	0.907767	0.0454382	-0.0596197	0.150496	0.386527	0.813994	0.0483069	-0.0883238	0.184938	0.478284	0.71371	0.00618899	-0.115087	0.127465	0.918209	0.954484	0.0527566	-0.0929036	0.198417
ENSMUSG00000002748	22385	Baz1b	protein_coding	MGI Symbol	5	Tyrosine-protein kinase BAZ1B [Source:UniProtKB/Swiss-Prot;Acc:Q9Z277]	0.497105	0.327899	0.66631	7.21757e-07	4.47207e-06	-0.243827	-0.384001	-0.103653	0.00114762	0.0348228	0.08493	-0.096558	0.266418	0.349213	0.439035	0.00562014	-0.125626	0.136866	0.931332	0.998763	0.185286	0.0402471	0.330325	0.0136957	0.0250834	0.0208726	-0.12831	0.170056	0.778397	0.960646	-0.0947357	-0.286435	0.0969638	0.323201	0.585659	-0.275273	-0.447114	-0.103432	0.0024869	0.0167692	0.168348	-0.036395	0.37309
ENSMUSG00000002763	224824	Pex6	protein_coding	MGI Symbol	4	Peroxisome assembly factor 2 [Source:UniProtKB/Swiss-Prot;Acc:Q99LC9]	-0.22315	-0.426165	-0.0201339	0.0321027	0.0548288	0.0160351	-0.149357	0.181427	0.84535	0.941176	-0.314959	-0.530787	-0.0991318	0.00538311	0.0124952	-0.0552289	-0.210876	0.100418	0.476709	0.983698	-0.434998	-0.608979	-0.261017	1.14435e-05	4.61401e-05	0.0523011	-0.124281	0.228883	0.552105	0.899734	0.0648099	-0.164591	0.294211	0.570515	0.77796	0.450038	0.245219	0.654858	7.52859e-05	0.00145499	0.107845	-0.138005	0.353695
ENSMUSG00000002767	27398	Mrpl2	protein_coding	MGI Symbol	5	mitochondrial ribosomal protein L2 [Source:MGI Symbol;Acc:MGI:1351622]	-0.557706	-0.756288	-0.359125	1.63705e-06	9.12461e-06	0.0308031	-0.133532	0.195139	0.706292	0.881898	-0.713879	-0.928994	-0.498764	6.55231e-08	6.76966e-07	0.0578562	-0.0964123	0.212125	0.452161	0.983698	-0.535637	-0.706375	-0.3649	2.04912e-07	1.37957e-06	0.133715	-0.0414648	0.308896	0.130483	0.573658	-0.120386	-0.347601	0.10683	0.290006	0.552377	0.433631	0.231695	0.635567	0.000102176	0.00179319	0.186975	-0.0553106	0.429262
ENSMUSG00000002768	17256	Mea1	protein_coding	MGI Symbol	1	Male-enhanced antigen 1 [Source:UniProtKB/Swiss-Prot;Acc:Q64327]	-0.38122	-0.534337	-0.228102	1.22269e-05	5.27475e-05	-0.0184323	-0.146908	0.110043	0.772922	0.909489	-0.586922	-0.755193	-0.418651	2.27707e-08	2.77935e-07	-0.018808	-0.139571	0.101955	0.754122	0.990955	-0.400008	-0.532814	-0.267202	4.51724e-07	2.73882e-06	0.0334642	-0.103524	0.170452	0.623571	0.923736	-0.205722	-0.382834	-0.0286099	0.0240179	0.140126	0.110058	-0.0463642	0.266479	0.162376	0.31748	0.18727	-0.000490705	0.375031
ENSMUSG00000002769	14711	Gnmt	protein_coding	MGI Symbol	2	glycine N-methyltransferase [Source:MGI Symbol;Acc:MGI:1202304]	-0.227495	-0.51003	0.05504	0.111283	0.161967	-0.0651271	-0.294964	0.16471	0.569369	0.809845	-0.285148	-0.58331	0.0130135	0.0603148	0.100981	0.155175	-0.0618897	0.37224	0.155918	0.934297	-0.147189	-0.38895	0.0945711	0.225155	0.292204	0.187752	-0.0587729	0.434277	0.131319	0.575026	0.0172165	-0.299377	0.33381	0.912864	0.965059	-0.170985	-0.459369	0.117399	0.237272	0.409496	-0.00747421	-0.347917	0.332969
ENSMUSG00000002771	14814	Grin2d	protein_coding	MGI Symbol	3	Glutamate receptor ionotropic, NMDA 2D [Source:UniProtKB/Swiss-Prot;Acc:Q03391]	-0.849296	-1.40155	-0.297043	0.00353169	0.00785782	0.0476364	-0.482628	0.577901	0.856568	0.945704	-0.891676	-1.53764	-0.245715	0.00813434	0.0179282	0.0492769	-0.439591	0.538145	0.8393	0.994126	-0.426095	-0.925599	0.0734102	0.0922588	0.135081	-0.0495988	-0.593518	0.49432	0.854434	0.975819	-0.416305	-1.07035	0.237743	0.205184	0.458408	-0.084062	-0.648663	0.480538	0.764605	0.859112	0.0900165	-0.574114	0.754147
ENSMUSG00000002778	68137	Kdelr1	protein_coding	MGI Symbol	5	KDEL (Lys-Asp-Glu-Leu) endoplasmic reticulum protein retention receptor 1 [Source:MGI Symbol;Acc:MGI:1915387]	-0.191587	-0.327153	-0.0560208	0.0068593	0.0141804	-0.12276	-0.233025	-0.0124961	0.0300796	0.198707	-0.251149	-0.394212	-0.108087	0.00104683	0.00299189	0.00434456	-0.0991515	0.107841	0.932681	0.998763	-0.253079	-0.368332	-0.137826	7.59308e-05	0.000249838	-0.0209483	-0.138792	0.0968958	0.720779	0.946104	0.00627437	-0.145511	0.15806	0.933706	0.972638	0.146039	0.00968865	0.282389	0.0364847	0.112748	-0.0631983	-0.226559	0.100163
ENSMUSG00000002781	70209	Tmem143	protein_coding	MGI Symbol	10	transmembrane protein 143 [Source:HGNC Symbol;Acc:HGNC:25603]	-0.183946	-0.364225	-0.00366569	0.0457444	0.074718	-0.0929884	-0.245657	0.0596805	0.224959	0.548543	-0.428942	-0.631665	-0.22622	0.000123778	0.000454611	0.0754941	-0.0679097	0.218898	0.293053	0.97334	-0.478075	-0.633879	-0.32227	3.16216e-07	2.01112e-06	-0.005094	-0.166626	0.156438	0.9494	0.993226	0.124626	-0.08705	0.336302	0.240509	0.498881	0.271773	0.0878752	0.455671	0.00487798	0.0269909	0.152009	-0.0722446	0.376262
ENSMUSG00000002797	110175	Ggct	protein_coding	MGI Symbol	6	Gamma-glutamylcyclotransferase [Source:UniProtKB/Swiss-Prot;Acc:Q9D7X8]	-0.133217	-0.442887	0.176454	0.389051	0.471589	0.568333	0.308067	0.828598	8.18269e-05	0.00743993	0.226951	-0.133924	0.587826	0.210538	0.289825	0.0965022	-0.124744	0.317748	0.382552	0.983698	0.111584	-0.132249	0.355418	0.359841	0.434157	0.028961	-0.218153	0.276075	0.81362	0.967269	0.211869	-0.163278	0.587017	0.259864	0.519533	-0.427986	-0.705984	-0.149987	0.00350018	0.0215232	0.208165	-0.189816	0.606145
ENSMUSG00000002803	399566	Btbd6	protein_coding	MGI Symbol	9	BTB/POZ domain-containing protein 6 [Source:UniProtKB/Swiss-Prot;Acc:Q8K2J9]	-0.625596	-0.788928	-0.462265	2.77185e-09	3.9733e-08	-0.0403154	-0.185954	0.105323	0.578281	0.81499	-0.68292	-0.870432	-0.495409	8.77618e-09	1.25123e-07	0.0391101	-0.097251	0.175471	0.564697	0.983698	-0.49903	-0.643467	-0.354593	2.79523e-08	2.45613e-07	0.101442	-0.0533974	0.256282	0.192511	0.65655	-0.144781	-0.338244	0.048683	0.137948	0.366365	0.1689	0.000552052	0.337248	0.0492911	0.13829	0.0170087	-0.184553	0.21857
ENSMUSG00000002804	66174	Nudt14	protein_coding	MGI Symbol	5	Uridine diphosphate glucose pyrophosphatase [Source:UniProtKB/Swiss-Prot;Acc:Q9D142]	-0.274495	-0.506539	-0.0424521	0.0216976	0.0388403	-0.04095	-0.248874	0.166974	0.692169	0.874042	-0.420662	-0.697996	-0.143328	0.00395818	0.00954417	0.0751267	-0.11869	0.268944	0.437256	0.983698	-0.463495	-0.663949	-0.26304	3.70245e-05	0.000132134	0.146288	-0.0742877	0.366863	0.187217	0.649335	0.117959	-0.164054	0.399971	0.40219	0.652991	0.340447	0.101352	0.579543	0.00648741	0.0329883	0.105217	-0.190631	0.401065
ENSMUSG00000002812	14248	Flii	protein_coding	MGI Symbol	4	isoform 2 [Source:RefSeq peptide;Acc:NP_001289136]	-0.531196	-0.704317	-0.358075	3.16378e-07	2.20785e-06	-0.0608213	-0.200692	0.0790496	0.383997	0.692193	-0.882542	-1.0683	-0.696785	1.24916e-11	7.05501e-10	-0.0232403	-0.154702	0.108222	0.722251	0.990955	-0.692558	-0.840491	-0.544625	1.84965e-11	5.26786e-10	-0.0338339	-0.183368	0.1157	0.649333	0.931322	-0.213225	-0.410982	-0.0154676	0.0353215	0.174684	-0.0432669	-0.220749	0.134215	0.624287	0.766242	0.290525	0.0785986	0.502452
ENSMUSG00000002814	21975	Top3a	protein_coding	MGI Symbol	6	topoisomerase (DNA) III alpha [Source:MGI Symbol;Acc:MGI:1197527]	-0.28564	-0.489689	-0.0815907	0.0073542	0.0150883	0.10342	-0.07657	0.283411	0.251807	0.578885	-0.167551	-0.414574	0.0794725	0.177625	0.252337	-0.000632811	-0.166764	0.165498	0.993884	0.999934	-0.128626	-0.308787	0.0515354	0.156443	0.213709	0.140718	-0.0498103	0.331247	0.143023	0.588789	-0.0395579	-0.296227	0.217111	0.7566	0.890351	0.0566102	-0.157235	0.270455	0.594928	0.74306	-0.0146688	-0.279735	0.250397
ENSMUSG00000002820	235040	Atg4d	protein_coding	MGI Symbol	5	Cysteine protease ATG4D Cysteine protease ATG4D, mitochondrial [Source:UniProtKB/Swiss-Prot;Acc:Q8BGV9]	-0.311908	-0.525735	-0.0980811	0.00540069	0.0114925	-0.125261	-0.308972	0.0584495	0.175416	0.488588	-0.204702	-0.45634	0.0469359	0.107774	0.165106	0.12243	-0.0499895	0.294849	0.158645	0.934297	-0.23336	-0.420946	-0.0457737	0.0161532	0.0290677	0.0952194	-0.0993328	0.289772	0.327823	0.775631	0.151088	-0.111175	0.413351	0.25059	0.51056	0.560507	0.330643	0.79037	1.68612e-05	0.000548151	-0.232467	-0.506864	0.04193
ENSMUSG00000002825	60507	Qtrt1	protein_coding	MGI Symbol	11	Queuine tRNA-ribosyltransferase catalytic subunit 1 [Source:UniProtKB/Swiss-Prot;Acc:Q9JMA2]	-1.69424	-2.0019	-1.38657	2.06206e-13	2.30862e-11	0.538415	0.231585	0.845245	0.00105134	0.0330601	-1.08833	-1.41976	-0.756905	8.15099e-08	8.11164e-07	-0.120606	-0.387826	0.146613	0.366405	0.983698	-0.817209	-1.08335	-0.551072	3.11867e-07	1.98735e-06	-0.188107	-0.484649	0.108435	0.206699	0.673322	-0.39173	-0.722286	-0.0611743	0.0214797	0.132636	0.0595044	-0.232309	0.351318	0.681891	0.807414	-0.0674887	-0.39969	0.264713
ENSMUSG00000002831	57435	Plin4	protein_coding	MGI Symbol	2	Perilipin-4 [Source:UniProtKB/Swiss-Prot;Acc:O88492]	-1.35012	-1.85234	-0.847893	3.50039e-06	1.76473e-05	-0.522271	-1.03269	-0.0118533	0.0451662	0.248548	-2.83398	-3.38022	-2.28775	1.12038e-12	1.15529e-10	-0.236979	-0.762368	0.28841	0.366702	0.983698	-4.66858	-5.15015	-4.187	3.38024e-21	9.5304e-18	-0.180209	-0.772246	0.411829	0.541205	0.895823	1.59761	1.09338	2.10185	1.68357e-07	0.000128615	0.556849	0.111659	1.00204	0.0156236	0.0618001	0.961597	0.423012	1.50018
ENSMUSG00000002833	15193	Hdgfl2	protein_coding	MGI Symbol	12	Mus musculus HDGF like 2 (Hdgfl2), transcript variant 4, mRNA. [Source:RefSeq mRNA;Acc:NM_001331053]	-0.327188	-0.505014	-0.149362	0.000642431	0.00172619	0.14909	0.00107719	0.297102	0.0484387	0.25908	-0.629165	-0.822373	-0.435957	9.67805e-08	9.31718e-07	0.0153179	-0.123211	0.153847	0.823966	0.992372	-0.15273	-0.306245	0.000784464	0.0511223	0.0802424	0.0159281	-0.141131	0.172987	0.838331	0.971569	-0.461117	-0.665337	-0.256897	5.18085e-05	0.00428545	-0.318267	-0.499291	-0.137244	0.00103113	0.00907885	0.451066	0.234171	0.667962
ENSMUSG00000002835	27221	Chaf1a	protein_coding	MGI Symbol	1	Chromatin assembly factor 1 subunit A [Source:UniProtKB/Swiss-Prot;Acc:Q9QWF0]	-0.255389	-0.736999	0.226221	0.289602	0.367506	0.245641	-0.182042	0.673324	0.251999	0.578885	-0.446808	-0.993091	0.0994757	0.105937	0.162856	-0.137134	-0.528381	0.254113	0.482066	0.983698	-0.328258	-0.745852	0.0893363	0.11974	0.169692	-0.169691	-0.605363	0.265982	0.435061	0.844603	-0.255684	-0.821136	0.309769	0.365525	0.622078	-0.709317	-1.14076	-0.277869	0.00196781	0.0141691	0.43706	-0.152399	1.02652
ENSMUSG00000002844	11544	Adprh	protein_coding	MGI Symbol	1	[Protein ADP-ribosylarginine] hydrolase [Source:UniProtKB/Swiss-Prot;Acc:P54923]	-0.356594	-0.677406	-0.0357825	0.0303292	0.0521228	-0.0239679	-0.313558	0.265622	0.867744	0.950603	0.0462765	-0.373818	0.466371	0.82462	0.866772	0.157156	-0.109494	0.423806	0.240029	0.953872	0.115946	-0.17574	0.407632	0.425752	0.500339	-0.0786694	-0.370199	0.21286	0.587845	0.913762	0.0874864	-0.348928	0.523901	0.686969	0.85272	-0.266104	-0.605925	0.0737173	0.121112	0.260024	-0.426839	-0.869034	0.015357
ENSMUSG00000002845	67846	Tmem39a	protein_coding	MGI Symbol	14	Transmembrane protein 39A [Source:UniProtKB/Swiss-Prot;Acc:Q9CYC3]	0.127436	-0.239695	0.494568	0.486287	0.566302	-0.442012	-0.757776	-0.126248	0.00735583	0.0944594	-0.626539	-1.04913	-0.20395	0.00475533	0.011192	0.119365	-0.183685	0.422415	0.429948	0.983698	-0.306005	-0.632375	0.0203646	0.0652821	0.0997081	0.0088801	-0.330236	0.347996	0.957974	0.993948	-0.201169	-0.640781	0.238444	0.359861	0.617864	0.015211	-0.365881	0.396303	0.935983	0.964624	0.311963	-0.15027	0.774196
ENSMUSG00000002846	76916	Timmdc1	protein_coding	MGI Symbol	2	Complex I assembly factor TIMMDC1, mitochondrial [Source:UniProtKB/Swiss-Prot;Acc:Q8BUY5]	0.0915773	-0.0647635	0.247918	0.242873	0.316322	-0.00739352	-0.137666	0.12288	0.909078	0.968199	0.258817	0.0763192	0.441316	0.00668403	0.0151124	0.0710248	-0.0510473	0.193097	0.245989	0.960351	0.171618	0.0351664	0.308069	0.0151019	0.0273863	0.0338509	-0.104235	0.171937	0.622357	0.923736	0.158224	-0.0341892	0.350638	0.104133	0.316357	-0.0492849	-0.211296	0.112727	0.541445	0.697342	-0.174634	-0.376567	0.0272995
ENSMUSG00000002847	85031	Pla1a	protein_coding	MGI Symbol	1	Phospholipase A1 member A [Source:UniProtKB/Swiss-Prot;Acc:Q8VI78]	0.00356506	-0.239149	0.246279	0.976419	0.982699	-0.0677808	-0.268571	0.133009	0.498275	0.767992	0.0522311	-0.215568	0.320031	0.694996	0.760397	0.0960065	-0.0928229	0.284836	0.30964	0.975777	0.272674	0.0623386	0.48301	0.0124659	0.0231211	0.000667789	-0.213577	0.214913	0.994995	0.998923	-0.124437	-0.407811	0.158938	0.379376	0.633674	-0.03086	-0.279857	0.218137	0.803124	0.884346	-0.116447	-0.416963	0.18407
ENSMUSG00000002870	17216	Mcm2	protein_coding	MGI Symbol	7	DNA replication licensing factor MCM2 [Source:UniProtKB/Swiss-Prot;Acc:P97310]	-0.614632	-1.08647	-0.142798	0.0120806	0.023333	0.112077	-0.327849	0.552002	0.608812	0.83327	-0.366232	-0.949105	0.216641	0.210943	0.290141	-0.0366548	-0.442548	0.369238	0.855824	0.996139	-0.866237	-1.2706	-0.461873	0.000105439	0.000334312	-0.414116	-0.846163	0.0179301	0.0597678	0.41384	0.46335	-0.118459	1.04516	0.11511	0.332014	-0.0729028	-0.504396	0.35859	0.734054	0.841173	-0.136323	-0.74364	0.470993
ENSMUSG00000002871	24100	Tpra1	protein_coding	MGI Symbol	23	Transmembrane protein adipocyte-associated 1 [Source:UniProtKB/Swiss-Prot;Acc:Q99MU1]	-0.715979	-0.875546	-0.556412	5.62829e-11	1.728e-09	0.0190561	-0.11903	0.157142	0.781344	0.913056	-0.827792	-1.00416	-0.651428	1.7271e-11	8.78914e-10	0.0278152	-0.10117	0.156801	0.664716	0.988678	-0.619513	-0.75811	-0.480916	6.21345e-11	1.45657e-09	-0.114144	-0.25842	0.0301307	0.117439	0.549419	-0.180463	-0.363973	0.00304663	0.0537269	0.220806	0.122717	-0.038612	0.284046	0.131777	0.274394	0.130869	-0.0627748	0.324512
ENSMUSG00000002881	17936	Nab1	protein_coding	MGI Symbol	5	NGFI-A-binding protein 1 [Source:UniProtKB/Swiss-Prot;Acc:Q61122]	0.479128	0.262887	0.695369	6.72086e-05	0.000235457	0.0872236	-0.0924429	0.26689	0.331695	0.652785	0.768807	0.532146	1.00547	1.01668e-07	9.70456e-07	0.0141658	-0.155365	0.183697	0.866487	0.996817	0.629292	0.442433	0.816152	4.81802e-08	3.97533e-07	0.0705839	-0.121931	0.263099	0.462269	0.861212	0.15368	-0.0956866	0.403047	0.219636	0.474928	0.00639203	-0.213039	0.225823	0.953255	0.974183	-0.202455	-0.467951	0.0630407
ENSMUSG00000002885	26364	Adgre5	protein_coding	MGI Symbol	8	adhesion G protein-coupled receptor E5 [Source:MGI Symbol;Acc:MGI:1347095]	0.0951802	-0.212317	0.402678	0.534425	0.611095	0.11858	-0.137719	0.374879	0.354638	0.671132	0.362651	-0.00571124	0.731013	0.0534732	0.0910166	0.0203033	-0.218112	0.258719	0.863956	0.996817	0.363175	0.0914037	0.634947	0.0101926	0.0194321	0.176839	-0.0954031	0.449081	0.19624	0.661793	0.0197788	-0.371001	0.410558	0.918878	0.967871	-0.0997985	-0.42499	0.225393	0.537899	0.694818	-0.148891	-0.554546	0.256764
ENSMUSG00000002897	16172	Il17ra	protein_coding	MGI Symbol	3	Interleukin-17 receptor A [Source:UniProtKB/Swiss-Prot;Acc:Q60943]	-0.436063	-0.69712	-0.175005	0.0016978	0.00411599	-0.0181035	-0.238807	0.2026	0.868913	0.95117	-0.423609	-0.715259	-0.131959	0.00558203	0.0128924	0.12958	-0.0767417	0.335903	0.211137	0.950593	0.0597706	-0.169193	0.288734	0.600035	0.66547	0.303375	0.0675873	0.539163	0.0130864	0.185226	-0.353799	-0.661882	-0.0457156	0.0255514	0.145015	0.0143344	-0.257501	0.28617	0.915496	0.952539	-0.0305573	-0.353823	0.292708
ENSMUSG00000002900	16777	Lamb1	protein_coding	MGI Symbol	7	Laminin subunit beta-1 [Source:UniProtKB/Swiss-Prot;Acc:P02469]	0.523075	0.220724	0.825426	0.00121109	0.00304519	0.216839	-0.0239632	0.457641	0.0761547	0.326439	0.927667	0.534498	1.32084	2.76037e-05	0.000123319	-0.178522	-0.402282	0.0452385	0.11448	0.919776	0.158644	-0.0974154	0.414703	0.217244	0.283381	0.0670817	-0.190924	0.325088	0.601494	0.916337	0.590501	0.178094	1.00291	0.00622261	0.0635249	0.202553	-0.113023	0.518129	0.201486	0.367824	-0.187753	-0.621356	0.245851
ENSMUSG00000002908	84036	Kcnn1	protein_coding	MGI Symbol	8	potassium calcium-activated channel subfamily N member 1 [Source:HGNC Symbol;Acc:HGNC:6290]	-0.335883	-0.614072	-0.0576934	0.0192987	0.0350339	0.33742	0.0932968	0.581543	0.00805976	0.0988405	-0.331729	-0.64524	-0.0182179	0.0386753	0.0687672	-0.207057	-0.430206	0.0160917	0.0679908	0.833924	-0.594261	-0.826428	-0.362094	7.87979e-06	3.3161e-05	0.169182	-0.0940202	0.432385	0.200846	0.668646	0.0554752	-0.264518	0.375468	0.727398	0.87601	0.00266571	-0.257835	0.263166	0.98357	0.990097	0.333266	-0.00744288	0.673974
ENSMUSG00000002910	70807	Arrdc2	protein_coding	MGI Symbol	7	Arrestin domain-containing protein 2 [Source:UniProtKB/Swiss-Prot;Acc:Q9D668]	0.475413	-0.0448035	0.995629	0.072067	0.111249	0.573522	0.154458	0.992586	0.00864433	0.102965	0.486023	-0.0896062	1.06165	0.0955013	0.149323	-0.307446	-0.695973	0.0810812	0.117371	0.9248	0.533693	0.0849095	0.982477	0.0210596	0.0366329	0.568672	0.111395	1.02595	0.0161855	0.209572	-0.355116	-0.973017	0.262785	0.251706	0.511228	0.453827	-0.111269	1.01892	0.112185	0.246146	0.562912	-0.0900498	1.21587
ENSMUSG00000002944	12491	Cd36	protein_coding	MGI Symbol	6	Platelet glycoprotein 4 [Source:UniProtKB/Swiss-Prot;Acc:Q08857]	0.0588052	-0.467098	0.584708	0.822022	0.859965	-0.261673	-0.702893	0.179546	0.237148	0.563358	-0.469407	-1.05566	0.116846	0.113228	0.172149	0.494329	0.0813899	0.907269	0.0202777	0.707922	-2.018	-2.48143	-1.55457	1.21478e-10	2.54458e-09	0.111009	-0.351552	0.573569	0.629673	0.925655	2.04292	1.42007	2.66577	8.34807e-08	9.0347e-05	0.106747	-0.452297	0.665791	0.701072	0.820171	0.266539	-0.385836	0.918913
ENSMUSG00000002948	26400	Map2k7	protein_coding	MGI Symbol	10	Dual specificity mitogen-activated protein kinase kinase 7 [Source:UniProtKB/Swiss-Prot;Acc:Q8CE90]	-0.47628	-0.624589	-0.327971	1.28419e-07	1.0157e-06	0.0934985	-0.0277549	0.214752	0.126719	0.414325	-0.592637	-0.752263	-0.433011	5.68485e-09	8.79966e-08	0.0298244	-0.0843885	0.144037	0.599921	0.984352	-0.196199	-0.323119	-0.0692782	0.00338211	0.00730961	0.0224848	-0.10727	0.152239	0.727513	0.947718	-0.366614	-0.535566	-0.197662	8.90109e-05	0.00599512	-0.405187	-0.55677	-0.253603	3.85457e-06	0.000223479	0.209856	0.028821	0.39089
ENSMUSG00000002949	21856	Timm44	protein_coding	MGI Symbol	9	translocase of inner mitochondrial membrane 44 [Source:MGI Symbol;Acc:MGI:1343262]	-0.122902	-0.248455	0.00265058	0.0547799	0.0875387	-0.00960321	-0.113543	0.0943368	0.852534	0.94341	-0.197791	-0.335316	-0.0602666	0.00601725	0.0137799	-0.00751679	-0.105239	0.0902058	0.877004	0.99766	-0.132257	-0.240693	-0.0238216	0.0181855	0.0322022	-0.0389635	-0.14981	0.071883	0.480821	0.870053	-0.0730504	-0.218383	0.0722823	0.315103	0.57686	-0.0213918	-0.149578	0.106795	0.737193	0.842924	0.0652859	-0.0892227	0.219795
ENSMUSG00000002957	11772	Ap2a2	protein_coding	MGI Symbol	3	Mus musculus adaptor-related protein complex 2, alpha 2 subunit (Ap2a2), transcript variant 1, mRNA. [Source:RefSeq mRNA;Acc:NM_001357068]	-0.204832	-0.364012	-0.045652	0.0130765	0.0250147	-0.0761894	-0.205661	0.053282	0.240739	0.567729	-0.276882	-0.445034	-0.10873	0.00193962	0.00511613	-0.0871293	-0.208494	0.0342356	0.154218	0.934297	-0.36614	-0.501481	-0.230799	3.14306e-06	1.47734e-05	-0.03224	-0.170189	0.105709	0.638633	0.926987	0.0021291	-0.176372	0.18063	0.98085	0.991693	0.25952	0.0995523	0.419487	0.00222083	0.0154814	-0.00413937	-0.196104	0.187825
ENSMUSG00000002963	59047	Pnkp	protein_coding	MGI Symbol	17	polynucleotide kinase 3'- phosphatase [Source:MGI Symbol;Acc:MGI:1891698]	-0.419102	-0.607289	-0.230915	6.26811e-05	0.000221026	0.034458	-0.124946	0.193861	0.663956	0.859322	-0.369696	-0.580695	-0.158697	0.00106739	0.00304329	-0.0155281	-0.164913	0.133857	0.834354	0.992883	-0.241476	-0.405909	-0.0770441	0.00512559	0.010556	-0.0251024	-0.193979	0.143774	0.764979	0.95796	-0.143748	-0.365655	0.0781588	0.197441	0.447655	0.417744	0.22005	0.615439	0.000125927	0.00207804	-0.0149479	-0.248455	0.218559
ENSMUSG00000002968	75613	Med25	protein_coding	MGI Symbol	14	Mus musculus mediator complex subunit 25 (Med25), transcript variant 3, mRNA. [Source:RefSeq mRNA;Acc:NM_001331207]	-0.439218	-0.631448	-0.246987	4.38675e-05	0.000161184	-0.00251188	-0.161167	0.156143	0.974583	0.991496	-0.636081	-0.844307	-0.427855	3.44737e-07	2.745e-06	-0.0231848	-0.172361	0.125991	0.754616	0.990955	-0.451981	-0.617361	-0.286601	2.6387e-06	1.26827e-05	-0.00523659	-0.174512	0.164039	0.950362	0.993425	-0.207285	-0.42741	0.0128406	0.0641766	0.242285	-0.159211	-0.355103	0.0366805	0.108078	0.239279	0.194351	-0.040466	0.429169
ENSMUSG00000002980	57278	Bcam	protein_coding	MGI Symbol	5	Basal cell adhesion molecule [Source:UniProtKB/Swiss-Prot;Acc:Q9R069]	-0.444238	-0.744478	-0.143999	0.00483224	0.0104091	-0.0501776	-0.326986	0.226631	0.715514	0.885076	-0.461378	-0.828462	-0.0942938	0.0151651	0.0306919	-0.0424288	-0.303963	0.219105	0.744246	0.990955	-0.408766	-0.681172	-0.13636	0.00431948	0.00907707	-0.0395195	-0.333447	0.254408	0.786823	0.960898	-0.0950405	-0.469948	0.279867	0.610577	0.802181	-0.0135711	-0.324873	0.297731	0.930095	0.96143	-0.033038	-0.418098	0.352022
ENSMUSG00000002981	56457	Clptm1	protein_coding	MGI Symbol	9	Cleft lip and palate transmembrane [Source:UniProtKB/Swiss-Prot;Acc:Q8VBZ3]	-0.489802	-0.630125	-0.349479	2.24106e-08	2.26495e-07	-0.04501	-0.15815	0.0681303	0.425382	0.724326	-0.525285	-0.673835	-0.376735	1.6892e-08	2.17635e-07	-0.0121097	-0.118514	0.0942949	0.818911	0.992372	-0.364961	-0.483822	-0.246101	3.12107e-07	1.9879e-06	-0.0365178	-0.15772	0.0846849	0.545301	0.897456	-0.172433	-0.330145	-0.0147215	0.0329707	0.167908	-0.020682	-0.162475	0.121111	0.769249	0.862119	-0.00952677	-0.179695	0.160641
ENSMUSG00000002983	19698	Relb	protein_coding	MGI Symbol	10	avian reticuloendotheliosis viral (v-rel) oncogene related B [Source:MGI Symbol;Acc:MGI:103289]	-0.58348	-1.07806	-0.0889023	0.0220304	0.0393331	-0.177133	-0.651482	0.297216	0.454093	0.742827	-0.0844105	-0.774456	0.605635	0.80563	0.851782	0.0940052	-0.354135	0.542146	0.673299	0.988678	-0.313952	-0.777574	0.14967	0.178317	0.239433	-0.103528	-0.594099	0.387044	0.671444	0.935882	0.323547	-0.376652	1.02375	0.355238	0.614115	0.451359	-0.123344	1.02606	0.120055	0.258437	-0.676202	-1.38031	0.0279023
ENSMUSG00000002984	53333	Tomm40	protein_coding	MGI Symbol	6	Mitochondrial import receptor subunit TOM40 homolog [Source:UniProtKB/Swiss-Prot;Acc:Q9QYA2]	-0.619596	-0.791145	-0.448047	1.05757e-08	1.22194e-07	0.0785155	-0.0653759	0.222407	0.276058	0.601585	-0.550067	-0.738207	-0.361927	7.89451e-07	5.5751e-06	0.049294	-0.0852646	0.183853	0.462637	0.983698	-0.560158	-0.707826	-0.41249	3.46995e-09	4.15722e-08	-0.0157192	-0.167853	0.136414	0.83533	0.970869	0.0593849	-0.138344	0.257113	0.546575	0.760374	-0.0155083	-0.189117	0.1581	0.857367	0.919034	0.00898581	-0.201064	0.219036
ENSMUSG00000002985	11816	Apoe	protein_coding	MGI Symbol	11	Apolipoprotein E [Source:UniProtKB/Swiss-Prot;Acc:P08226]	-0.376654	-0.612268	-0.14104	0.00253268	0.00585996	-0.144285	-0.335115	0.0465458	0.134045	0.425427	-0.8126	-1.06514	-0.56006	1.23437e-07	1.13855e-06	0.025988	-0.153132	0.205108	0.770437	0.990955	-0.666695	-0.86849	-0.4649	7.18811e-08	5.6338e-07	0.110587	-0.0926798	0.313855	0.277453	0.744326	-0.119918	-0.389017	0.149181	0.372434	0.628023	0.282296	0.0423759	0.522215	0.0223607	0.0799117	0.291662	0.0037822	0.579542
ENSMUSG00000002992	11813	Apoc2	protein_coding	MGI Symbol	3	Apolipoprotein C-II [Source:UniProtKB/Swiss-Prot;Acc:Q05020]	0.167205	-0.134691	0.469101	0.269029	0.34504	-0.690663	-0.936095	-0.44523	1.58001e-06	0.00045599	-0.703779	-1.02161	-0.385944	6.77992e-05	0.000269022	-0.0193044	-0.245189	0.20658	0.863479	0.996817	-0.539542	-0.793323	-0.285761	0.000116392	0.00036494	-0.570709	-0.832618	-0.3088	8.41837e-05	0.00993903	-0.183541	-0.521772	0.154689	0.278669	0.54072	-0.287432	-0.594045	0.019182	0.0653269	0.1682	0.180321	-0.182891	0.543533
ENSMUSG00000002996	73389	Hbp1	protein_coding	MGI Symbol	9	HMG-box transcription factor 1 [Source:HGNC Symbol;Acc:HGNC:23200]	-0.144835	-0.326647	0.0369765	0.11501	0.166701	-0.0487857	-0.197244	0.0996731	0.509674	0.77435	-0.32665	-0.520336	-0.132964	0.00155042	0.00420536	0.00245063	-0.137201	0.142102	0.97183	0.998763	-0.225942	-0.381353	-0.0705318	0.00554124	0.0113098	-0.0213543	-0.180328	0.13762	0.787019	0.960898	-0.0982567	-0.303596	0.107082	0.338592	0.59925	0.116183	-0.067698	0.300063	0.208454	0.376522	0.133029	-0.0872661	0.353324
ENSMUSG00000003031	12576	Cdkn1b	protein_coding	MGI Symbol	3	Cyclin-dependent kinase inhibitor 1B [Source:UniProtKB/Swiss-Prot;Acc:P46414]	0.466314	0.290968	0.641661	4.20098e-06	2.07296e-05	0.0526843	-0.0908794	0.196248	0.461865	0.747779	0.423894	0.21915	0.628639	0.000163183	0.000580461	0.0353598	-0.0990154	0.169735	0.597124	0.984262	0.63588	0.480915	0.790846	5.34623e-10	8.6573e-09	-0.0430212	-0.194796	0.108754	0.569245	0.906892	-0.176626	-0.395436	0.0421842	0.110419	0.325321	-0.0477067	-0.235072	0.139658	0.609013	0.754888	0.0951044	-0.133054	0.323263
ENSMUSG00000003032	16600	Klf4	protein_coding	MGI Symbol	3	Krueppel-like factor 4 [Source:UniProtKB/Swiss-Prot;Acc:Q60793]	1.04893	0.550321	1.54753	0.000133298	0.000430287	-0.462508	-0.852208	-0.0728087	0.0212991	0.164094	0.529947	-0.136274	1.19617	0.115527	0.175253	-0.15047	-0.545158	0.244217	0.444774	0.983698	0.33352	-0.126146	0.793187	0.149989	0.206019	0.131089	-0.329057	0.591234	0.567304	0.906463	0.0459558	-0.660701	0.752613	0.895889	0.95834	0.29402	-0.303785	0.891826	0.325483	0.503939	0.0564705	-0.678778	0.791719
ENSMUSG00000003033	11767	Ap1m1	protein_coding	MGI Symbol	8	AP-1 complex subunit mu-1 [Source:UniProtKB/Swiss-Prot;Acc:P35585]	-0.410315	-0.560872	-0.259757	2.7701e-06	1.43729e-05	-0.0127086	-0.138125	0.112708	0.838461	0.938634	-0.498531	-0.663361	-0.3337	4.17339e-07	3.23581e-06	-0.00117426	-0.11903	0.116682	0.984003	0.999004	-0.481757	-0.61173	-0.351785	5.89992e-09	6.53217e-08	0.13287	-0.00117891	0.266919	0.0519452	0.382216	-0.0179474	-0.191648	0.155753	0.835332	0.928727	0.0866671	-0.0665502	0.239884	0.25913	0.433844	0.0755072	-0.109174	0.260189
ENSMUSG00000003037	17274	Rab8a	protein_coding	MGI Symbol	3	RAB8A, member RAS oncogene family [Source:MGI Symbol;Acc:MGI:96960]	-0.263265	-0.433258	-0.0932732	0.00333001	0.00746408	-0.0421682	-0.18075	0.0964133	0.541341	0.793946	-0.543548	-0.725682	-0.361415	5.37997e-07	4.00859e-06	0.0163059	-0.114107	0.146719	0.801421	0.992101	-0.17057	-0.315509	-0.0256306	0.0223383	0.038609	-0.0172787	-0.165678	0.131121	0.814811	0.967538	-0.356673	-0.549475	-0.16387	0.000605981	0.0172886	-0.354764	-0.528265	-0.181262	0.000190501	0.0027767	0.238115	0.0310754	0.445154
ENSMUSG00000003038	15331	Hmgn2	protein_coding	MGI Symbol	13	Non-histone chromosomal protein HMG-17 [Source:UniProtKB/Swiss-Prot;Acc:P09602]	0.493864	0.0800282	0.9077	0.0206423	0.0372284	0.228673	-0.0980184	0.555365	0.164496	0.472949	0.574472	0.0627171	1.08623	0.0288233	0.0533688	0.155591	-0.132801	0.443983	0.281417	0.971353	0.690073	0.347509	1.03264	0.000228591	0.000662364	-0.207354	-0.514439	0.0997304	0.179532	0.63934	0.0399898	-0.504137	0.584116	0.88244	0.953023	-0.51526	-0.921179	-0.109341	0.0142583	0.0578845	0.148065	-0.423272	0.719402
ENSMUSG00000003039	67922	Fam32a	protein_coding	MGI Symbol	2	Protein FAM32A [Source:UniProtKB/Swiss-Prot;Acc:Q9CR80]	-0.302398	-0.512118	-0.0926788	0.00590132	0.0124313	0.0678931	-0.104778	0.240564	0.430744	0.728388	-0.54269	-0.76959	-0.315791	2.25694e-05	0.000102917	-0.0467836	-0.20918	0.115613	0.562984	0.983698	-0.237255	-0.417555	-0.0569549	0.0113027	0.0212336	-0.0486265	-0.233031	0.135778	0.596358	0.915257	-0.352219	-0.592258	-0.11218	0.00515847	0.0566298	-0.305282	-0.519467	-0.091098	0.00643903	0.0327936	0.308185	0.0519624	0.564408
ENSMUSG00000003053	13095	Cyp2c29	protein_coding	MGI Symbol	3	Cytochrome P450 2C29 [Source:UniProtKB/Swiss-Prot;Acc:Q64458]	0.636117	0.139007	1.13323	0.0135511	0.0258047	-0.37079	-0.784303	0.0427232	0.0773512	0.329148	-0.104394	-0.630723	0.421936	0.690105	0.756447	0.275759	-0.112327	0.663844	0.158364	0.934297	0.440634	0.01552	0.865749	0.0425894	0.0681	0.0961633	-0.347518	0.539844	0.663124	0.933044	-0.269269	-0.823466	0.284928	0.331304	0.592491	0.468039	-0.0200816	0.956161	0.0596765	0.157974	0.369721	-0.224542	0.963983
ENSMUSG00000003062	76205	Stard3nl	protein_coding	MGI Symbol	10	Mus musculus STARD3 N-terminal like (Stard3nl), transcript variant 2, mRNA. [Source:RefSeq mRNA;Acc:NM_001347485]	0.355045	0.107196	0.602894	0.00620099	0.0129598	0.0791908	-0.124027	0.282409	0.434835	0.73084	0.44779	0.132157	0.763422	0.0066661	0.0150745	0.0778699	-0.108426	0.264166	0.402509	0.983698	0.244176	0.0354243	0.452928	0.0231085	0.0397248	0.0196438	-0.188638	0.227925	0.849505	0.974409	0.281484	-0.047902	0.610869	0.0916955	0.295521	0.374516	0.104451	0.644582	0.00787087	0.0380846	-0.0135541	-0.359611	0.332503
ENSMUSG00000003068	20869	Stk11	protein_coding	MGI Symbol	10	Serine/threonine-protein kinase STK11 [Source:UniProtKB/Swiss-Prot;Acc:Q9WTK7]	-0.243176	-0.418517	-0.067836	0.00786592	0.0159967	-0.01624	-0.159125	0.126645	0.819145	0.928969	-0.446699	-0.634009	-0.259388	2.3572e-05	0.000107038	-0.0840962	-0.218347	0.0501551	0.212306	0.950593	-0.371083	-0.520729	-0.221436	1.30175e-05	5.18267e-05	0.0392075	-0.113095	0.19151	0.605077	0.917788	-0.159712	-0.358347	0.0389234	0.111776	0.327338	0.458723	0.2826	0.634845	5.93704e-06	0.00029096	0.187282	-0.0258221	0.400387
ENSMUSG00000003072	66043	Atp5d	protein_coding	MGI Symbol	4	ATP synthase subunit delta, mitochondrial [Source:UniProtKB/Swiss-Prot;Acc:Q9D3D9]	-0.848462	-1.05934	-0.637582	8.62339e-10	1.51136e-08	-0.15402	-0.321205	0.013164	0.0698934	0.312678	-1.212	-1.43725	-0.986756	4.00213e-13	5.90632e-11	0.0782722	-0.0788154	0.23536	0.319273	0.975895	-0.981464	-1.16113	-0.801795	2.59881e-13	1.79569e-11	0.0185632	-0.160479	0.197606	0.834773	0.970496	-0.152268	-0.393807	0.0892715	0.209464	0.463187	0.109618	-0.106957	0.326193	0.311792	0.489748	0.209522	-0.0498171	0.46886
ENSMUSG00000003099	19060	Ppp5c	protein_coding	MGI Symbol	11	Serine/threonine-protein phosphatase 5 [Source:UniProtKB/Swiss-Prot;Acc:Q60676]	-0.377144	-0.527674	-0.226615	1.10773e-05	4.81784e-05	-0.154313	-0.277778	-0.0308486	0.0156971	0.139533	-0.76611	-0.928443	-0.603777	1.49339e-11	8.04757e-10	-0.0169677	-0.133065	0.0991301	0.768804	0.990955	-0.520972	-0.650046	-0.391898	7.9869e-10	1.22256e-08	-0.0709635	-0.202756	0.0608288	0.28235	0.747497	-0.262106	-0.433959	-0.0902534	0.00378322	0.0474253	0.1807	0.0279573	0.333442	0.0216886	0.0780897	0.234653	0.0508928	0.418412
ENSMUSG00000003119	69131	Cdk12	protein_coding	MGI Symbol	6	Cyclin-dependent kinase 12 [Source:UniProtKB/Swiss-Prot;Acc:Q14AX6]	0.301645	0.0791797	0.524111	0.00922397	0.0184835	-0.140062	-0.324341	0.044217	0.132077	0.422821	0.182805	-0.0681026	0.433712	0.148356	0.216458	-0.0506722	-0.22433	0.122985	0.557988	0.983698	0.287107	0.0921021	0.482112	0.00502408	0.0103716	-0.00539554	-0.202428	0.191637	0.956054	0.993948	-0.154974	-0.421103	0.111154	0.245588	0.504023	-0.418376	-0.648013	-0.18874	0.000713534	0.00698885	-0.0212213	-0.301376	0.258933
ENSMUSG00000003123	16890	Lipe	protein_coding	MGI Symbol	8	Hormone-sensitive lipase [Source:UniProtKB/Swiss-Prot;Acc:P54310]	-0.674573	-0.930275	-0.41887	4.80475e-06	2.32746e-05	0.337859	0.112491	0.563226	0.00435284	0.070929	-0.356797	-0.6474	-0.0661935	0.0174847	0.0346308	0.18037	-0.0200103	0.380751	0.0762633	0.859946	-0.616914	-0.826828	-0.407	7.17149e-07	4.08492e-06	0.105495	-0.119296	0.330286	0.347854	0.786901	0.440488	0.143231	0.737745	0.00477514	0.0541613	0.139665	-0.103369	0.382699	0.251738	0.424918	0.0200827	-0.294629	0.334794
ENSMUSG00000003131	18475	Pafah1b2	protein_coding	MGI Symbol	9	Platelet-activating factor acetylhydrolase IB subunit beta [Source:UniProtKB/Swiss-Prot;Acc:Q61206]	0.277539	0.133218	0.421859	0.000394129	0.00112112	-0.114944	-0.234657	0.00476885	0.0593464	0.287479	0.357714	0.18931	0.526119	0.000117732	0.000434003	0.0195798	-0.0931381	0.132298	0.726882	0.990955	0.412098	0.284476	0.539721	1.1494e-07	8.42398e-07	-0.109764	-0.237032	0.0175034	0.0888477	0.48748	-0.034804	-0.213528	0.14392	0.695444	0.857389	-0.195695	-0.347163	-0.044227	0.0127422	0.0535368	-0.19512	-0.381821	-0.00841844
ENSMUSG00000003134	54610	Tbc1d8	protein_coding	MGI Symbol	5	Mus musculus TBC1 domain family, member 8 (Tbc1d8), transcript variant 3, mRNA. [Source:RefSeq mRNA;Acc:NM_001357522]	0.116318	-0.231162	0.463798	0.501853	0.580733	-0.570842	-0.860298	-0.281386	0.00029447	0.0157394	0.00213651	-0.392266	0.396539	0.991302	0.994365	0.0942077	-0.179343	0.367759	0.489694	0.983698	0.0364136	-0.267346	0.340174	0.809444	0.846397	0.167896	-0.142857	0.47865	0.280735	0.746806	0.0599307	-0.355994	0.475855	0.771968	0.898427	-0.355271	-0.712769	0.00222644	0.0513708	0.142615	-0.456661	-0.895421	-0.0179007
ENSMUSG00000003135	52846	Cnot11	protein_coding	MGI Symbol	4	CCR4-NOT transcription complex subunit 11 [Source:UniProtKB/Swiss-Prot;Acc:Q9CWN7]	0.356818	0.183104	0.530532	0.000180079	0.000561511	0.0895478	-0.053057	0.232153	0.211212	0.530254	0.361535	0.154241	0.568829	0.00111774	0.00316186	-0.000214478	-0.133086	0.132657	0.997408	0.999934	0.47556	0.322102	0.629018	2.60807e-07	1.6995e-06	0.137475	-0.0141177	0.289068	0.0741815	0.452086	-0.114239	-0.335294	0.106815	0.301861	0.563986	-0.114883	-0.299898	0.0701326	0.216244	0.385356	0.0848307	-0.144976	0.314637
ENSMUSG00000003153	20527	Slc2a3	protein_coding	MGI Symbol	8	solute carrier family 2 (facilitated glucose transporter), member 3 [Source:MGI Symbol;Acc:MGI:95757]	-0.312754	-1.0062	0.380689	0.366743	0.449159	0.859359	0.27877	1.43995	0.00481842	0.0755759	0.496809	-0.306447	1.30006	0.218019	0.297855	0.0329837	-0.44542	0.511388	0.889665	0.997726	0.396002	-0.150887	0.942891	0.150794	0.207015	-0.0478205	-0.580439	0.484798	0.85665	0.976825	0.133791	-0.712044	0.979625	0.750414	0.886762	-0.0588415	-0.731844	0.614161	0.860365	0.920923	0.0497969	-0.838459	0.938052
ENSMUSG00000003154	60611	Foxj2	protein_coding	MGI Symbol	3	Forkhead box protein J2 [Source:UniProtKB/Swiss-Prot;Acc:Q9ES18]	-0.460988	-0.648846	-0.27313	1.53033e-05	6.43395e-05	-0.197644	-0.362226	-0.0330627	0.019912	0.15859	-0.687443	-0.902743	-0.472143	1.44223e-07	1.29891e-06	0.179897	0.0252328	0.334562	0.023836	0.726726	-0.262591	-0.428991	-0.0961919	0.0028357	0.00624613	-0.0646774	-0.235913	0.106558	0.448968	0.853051	-0.244954	-0.468833	-0.0210757	0.0328512	0.167704	-0.223113	-0.415364	-0.0308618	0.0241324	0.084487	0.0288108	-0.204765	0.262386
ENSMUSG00000003161	109552	Sri	protein_coding	MGI Symbol	7	Sorcin [Source:UniProtKB/Swiss-Prot;Acc:Q6P069]	0.280969	0.0850391	0.476899	0.00615153	0.012866	0.183934	0.0222993	0.345568	0.0268293	0.185561	0.347869	0.127396	0.568343	0.00283957	0.00711997	0.0142741	-0.137108	0.165657	0.849539	0.994382	0.543997	0.372939	0.715054	1.56284e-07	1.09771e-06	0.0438845	-0.127875	0.215644	0.607779	0.918086	-0.181853	-0.416273	0.0525662	0.124512	0.345889	-0.361436	-0.563548	-0.159324	0.000866924	0.00800764	0.117033	-0.129688	0.363754
ENSMUSG00000003166	13356	Dgcr2	protein_coding	MGI Symbol	8		-0.126238	-0.344206	0.0917301	0.248122	0.321979	0.0574778	-0.123282	0.238238	0.523391	0.783368	0.0670553	-0.17518	0.30929	0.57828	0.659187	-0.0883666	-0.258283	0.0815496	0.298859	0.97334	-0.219654	-0.408105	-0.0312033	0.0235635	0.0404626	0.0826204	-0.110589	0.27583	0.39186	0.818549	0.198343	-0.057235	0.453921	0.124372	0.345642	0.491848	0.26706	0.716637	7.96563e-05	0.00151686	-0.135816	-0.40695	0.135319
ENSMUSG00000003184	54131	Irf3	protein_coding	MGI Symbol	13	interferon regulatory factor 3 [Source:MGI Symbol;Acc:MGI:1859179]	-0.37828	-0.550311	-0.206248	7.45261e-05	0.000257344	-0.0178272	-0.15824	0.122586	0.798425	0.919682	-0.480512	-0.664918	-0.296107	5.89337e-06	3.17978e-05	-0.0270377	-0.159118	0.105042	0.680723	0.988789	-0.194751	-0.341475	-0.0480272	0.0106682	0.0201994	-0.0518743	-0.202028	0.0982794	0.488334	0.872945	-0.312799	-0.507961	-0.117637	0.00247513	0.0373773	0.265863	0.0926266	0.4391	0.00359342	0.0219584	0.0844054	-0.125081	0.293892
ENSMUSG00000003190	75736	Bcl2l12	protein_coding	MGI Symbol	6	BCL2-like 12 (proline rich) [Source:MGI Symbol;Acc:MGI:1922986]	-0.062989	-0.377062	0.251084	0.686837	0.748758	0.211065	-0.0595614	0.481693	0.122571	0.408218	-0.389839	-0.741691	-0.0379859	0.0308332	0.0564942	-0.146046	-0.395978	0.103887	0.243991	0.957622	-0.0436623	-0.320102	0.232777	0.750765	0.797496	-0.00232779	-0.28817	0.283515	0.986925	0.997378	-0.492222	-0.863373	-0.121071	0.0107291	0.0893772	-0.130386	-0.452656	0.191884	0.417626	0.593625	0.537915	0.151646	0.924184
ENSMUSG00000003198	224893	Zfp959	protein_coding	MGI Symbol	3	zinc finger protein 959 [Source:MGI Symbol;Acc:MGI:2385058]	0.570184	0.19872	0.941648	0.00358792	0.00797199	-0.0660969	-0.364607	0.232414	0.656327	0.856729	0.599957	0.10243	1.09748	0.0194398	0.0379678	-0.0243987	-0.306831	0.258034	0.862014	0.996749	0.720215	0.374732	1.0657	0.000149643	0.000455239	-0.00372067	-0.322076	0.314635	0.981236	0.996194	-0.144657	-0.680496	0.391182	0.58769	0.788138	-0.262176	-0.687565	0.163213	0.219608	0.389253	-0.0958698	-0.640305	0.448566
ENSMUSG00000003199	68047	Mpnd	protein_coding	MGI Symbol	9	MPN domain-containing protein [Source:UniProtKB/Swiss-Prot;Acc:Q3TV65]	-0.589183	-0.77763	-0.400734	2.19209e-07	1.60658e-06	0.0600181	-0.0923771	0.212413	0.430003	0.727666	-0.37708	-0.576955	-0.177206	0.00048882	0.00152384	0.100363	-0.0436022	0.244329	0.166166	0.934297	-0.105553	-0.26555	0.0544439	0.189494	0.251993	0.0428546	-0.12098	0.206689	0.599305	0.916123	-0.171164	-0.382878	0.04055	0.109884	0.324999	-0.0511361	-0.240828	0.138556	0.588227	0.737313	-0.152084	-0.380641	0.0764727
ENSMUSG00000003200	20405	Sh3gl1	protein_coding	MGI Symbol	1	SH3-domain GRB2-like 1 [Source:MGI Symbol;Acc:MGI:700010]	-0.376124	-0.525575	-0.226673	1.03211e-05	4.52686e-05	0.00576124	-0.122333	0.133855	0.927885	0.974443	-0.230549	-0.403553	-0.0575459	0.0103856	0.0220894	0.0466367	-0.0730283	0.166302	0.434784	0.983698	-0.113109	-0.244861	0.0186441	0.0902724	0.132546	-0.00978748	-0.144478	0.124903	0.883753	0.981155	-0.070804	-0.252378	0.11077	0.43453	0.681543	0.163575	0.006359	0.320791	0.0418505	0.123807	-0.139814	-0.329175	0.0495475
ENSMUSG00000003206	50498	Ebi3	protein_coding	MGI Symbol	1	Interleukin-27 subunit beta [Source:UniProtKB/Swiss-Prot;Acc:O35228]	-0.402786	-1.22195	0.41638	0.325609	0.405941	0.273968	-0.459968	1.00791	0.454256	0.742908	-0.887836	-1.75107	-0.0246037	0.0441263	0.0769736	-0.286359	-0.969631	0.396913	0.401272	0.983698	-0.64313	-1.34161	0.0553481	0.0700392	0.106076	-0.121383	-0.900922	0.658155	0.75417	0.955997	-0.531066	-1.40638	0.344252	0.226735	0.483936	0.227481	-0.577359	1.03232	0.570348	0.722011	0.759019	-0.177753	1.69579
ENSMUSG00000003208	72886	Ccdc94	protein_coding	MGI Symbol	1	Coiled-coil domain-containing protein 94 [Source:UniProtKB/Swiss-Prot;Acc:Q9D6J3]	-0.525834	-0.774973	-0.276694	0.00012784	0.000414547	0.027089	-0.203565	0.257743	0.813234	0.926008	-0.537285	-0.835747	-0.238823	0.000809358	0.00236844	0.0249437	-0.188869	0.238756	0.814455	0.992101	-0.371759	-0.594123	-0.149395	0.00168375	0.00391668	0.122411	-0.121639	0.36646	0.316113	0.768236	-0.140582	-0.445229	0.164065	0.355875	0.614672	-0.129779	-0.380363	0.120805	0.300836	0.478266	0.0385405	-0.274427	0.351508
ENSMUSG00000003226	19386	Ranbp2	protein_coding	MGI Symbol	3	E3 SUMO-protein ligase RanBP2 [Source:UniProtKB/Swiss-Prot;Acc:Q9ERU9]	1.59915	1.38078	1.81753	3.52223e-17	9.14865e-14	-0.0985824	-0.284224	0.0870596	0.288928	0.612721	1.4202	1.18335	1.65704	1.69696e-14	6.622e-12	-0.0261948	-0.200396	0.148006	0.762333	0.990955	1.11762	0.929073	1.30617	2.39209e-14	2.80143e-12	0.0857901	-0.111762	0.283342	0.384618	0.813125	0.276382	0.0287932	0.52397	0.0296705	0.158507	-0.314839	-0.534097	-0.0955805	0.00609044	0.0315	0.0803752	-0.182911	0.343662
ENSMUSG00000003228	14773	Grk5	protein_coding	MGI Symbol	1	G protein-coupled receptor kinase 5 [Source:UniProtKB/Swiss-Prot;Acc:Q8VEB1]	-0.000833104	-0.418248	0.416581	0.996795	0.997871	0.212029	-0.144296	0.568354	0.235619	0.56145	0.722228	0.138627	1.30583	0.0166729	0.033246	0.00980979	-0.31273	0.332349	0.951197	0.998763	0.542849	0.158843	0.926856	0.00684464	0.0136777	-0.0709678	-0.429108	0.287173	0.69038	0.941241	0.189189	-0.430505	0.808882	0.540006	0.755881	-0.0689025	-0.545741	0.407936	0.77134	0.863345	-0.511033	-1.13382	0.11175
ENSMUSG00000003233	13544	Dvl3	protein_coding	MGI Symbol	4	Segment polarity DVL-3 [Source:UniProtKB/Swiss-Prot;Acc:Q61062]	-0.540676	-0.763839	-0.317512	1.85954e-05	7.58236e-05	-0.298104	-0.487485	-0.108723	0.00289837	0.0580881	-0.983527	-1.22934	-0.737713	9.86143e-10	2.10989e-08	-0.0294151	-0.209615	0.150784	0.742718	0.990955	-0.595801	-0.791736	-0.399866	3.76497e-07	2.34062e-06	-0.0167135	-0.22059	0.187163	0.868989	0.978104	-0.417142	-0.674714	-0.15957	0.00225581	0.0355106	-0.17614	-0.403742	0.0514627	0.125393	0.26534	0.144748	-0.127945	0.41744
ENSMUSG00000003234	27406	Abcf3	protein_coding	MGI Symbol	5	ATP-binding cassette, sub-family F (GCN20), member 3 [Source:MGI Symbol;Acc:MGI:1351656]	-0.0321693	-0.194412	0.130074	0.6902	0.75154	-0.174122	-0.307957	-0.0402873	0.0121793	0.119919	-0.198232	-0.374642	-0.0218223	0.0286702	0.0531307	0.0476517	-0.0781874	0.173491	0.447822	0.983698	-0.175887	-0.315565	-0.0362097	0.0149895	0.0271997	0.0376178	-0.105238	0.180473	0.596867	0.91564	0.0253068	-0.161227	0.21184	0.784944	0.903649	0.180981	0.0158023	0.346159	0.0326223	0.104583	-0.00805942	-0.206884	0.190766
ENSMUSG00000003235	224045	Eif2b5	protein_coding	MGI Symbol	2	Translation initiation factor eIF-2B subunit epsilon [Source:UniProtKB/Swiss-Prot;Acc:Q8CHW4]	-0.00963205	-0.144654	0.12539	0.885865	0.912133	-0.0590075	-0.170918	0.0529029	0.292304	0.615791	-0.0583241	-0.207513	0.090865	0.433368	0.523354	-0.0423986	-0.147708	0.0629102	0.419881	0.983698	-0.141803	-0.258656	-0.0249492	0.0187372	0.033049	0.0310799	-0.0884674	0.150627	0.601523	0.916337	0.04108	-0.116471	0.19863	0.600462	0.795005	0.290882	0.152131	0.429633	0.000139329	0.00222021	-0.0103155	-0.177541	0.15691
ENSMUSG00000003269	19158	Cyth2	protein_coding	MGI Symbol	9	Cytohesin-2 [Source:UniProtKB/Swiss-Prot;Acc:P63034]	0.0242734	-0.134082	0.182629	0.757877	0.809427	0.174752	0.0423299	0.307174	0.0110899	0.114544	0.184292	-0.00171505	0.370299	0.052041	0.0889051	-0.0925363	-0.21579	0.0307178	0.136718	0.9248	0.427833	0.284987	0.57068	5.02707e-07	3.00207e-06	0.104019	-0.037086	0.245124	0.143758	0.589696	-0.336078	-0.535607	-0.136548	0.00156925	0.028929	-0.157055	-0.328465	0.0143555	0.0713618	0.178673	0.0147335	-0.190545	0.220012
ENSMUSG00000003273	12348	Car11	protein_coding	MGI Symbol	5	Carbonic anhydrase-related protein 11 [Source:UniProtKB/Swiss-Prot;Acc:O70354]	-0.664181	-1.19079	-0.137569	0.0148428	0.0279106	0.26082	-0.226745	0.748385	0.285447	0.609619	-0.874864	-1.45061	-0.299121	0.00390025	0.00941848	-0.0918989	-0.53661	0.352812	0.677871	0.988789	-0.208896	-0.68402	0.266227	0.378794	0.452732	-0.0626734	-0.563414	0.438067	0.801222	0.96526	-0.757866	-1.35741	-0.158322	0.0146365	0.105955	0.550007	-0.05326	1.15327	0.0727139	0.180838	0.471502	-0.137661	1.08067
ENSMUSG00000003279	224997	Dlgap1	protein_coding	MGI Symbol	16	Mus musculus DLG associated protein 1 (Dlgap1), transcript variant 6, mRNA. [Source:RefSeq mRNA;Acc:NM_001347412]	-0.324986	-0.669687	0.0197154	0.0638701	0.100117	0.223905	-0.0815867	0.529396	0.146011	0.444918	0.00731082	-0.420386	0.435008	0.972559	0.980106	0.0291244	-0.246692	0.30494	0.831771	0.992854	0.339489	0.0238972	0.65508	0.0357228	0.0582683	0.0066717	-0.302808	0.316151	0.965397	0.993948	-0.303053	-0.757419	0.151312	0.18478	0.434105	-0.231439	-0.608177	0.145299	0.221076	0.390796	-0.108392	-0.564921	0.348137
ENSMUSG00000003283	15162	Hck	protein_coding	MGI Symbol	4	Tyrosine-protein kinase HCK [Source:UniProtKB/Swiss-Prot;Acc:P08103]	-0.0134818	-0.434042	0.407078	0.948565	0.960846	-0.0206781	-0.389112	0.347755	0.910082	0.968314	-0.211944	-0.721691	0.297802	0.404972	0.49552	0.243878	-0.0915377	0.579293	0.14916	0.930632	0.417505	0.0398599	0.795149	0.0311771	0.0517242	0.182582	-0.193547	0.55871	0.331745	0.778329	-0.385571	-0.924044	0.152902	0.155262	0.39352	-0.263603	-0.714525	0.187318	0.243794	0.416984	0.177785	-0.370822	0.726391
ENSMUSG00000003299	66163	Mrpl4	protein_coding	MGI Symbol	8	39S ribosomal protein L4, mitochondrial [Source:UniProtKB/Swiss-Prot;Acc:Q9DCU6]	-0.779887	-0.962241	-0.597533	1.91518e-10	4.48961e-09	-0.0375517	-0.192606	0.117503	0.626552	0.841059	-0.926183	-1.1258	-0.726562	2.34592e-11	1.12423e-09	0.078281	-0.0669852	0.223547	0.281972	0.971353	-0.714909	-0.872386	-0.557432	4.15447e-11	1.04159e-09	-0.0269856	-0.190574	0.136603	0.740102	0.950335	-0.132993	-0.341667	0.0756818	0.204616	0.457453	0.271367	0.0866281	0.456106	0.00511537	0.0278824	0.108744	-0.112749	0.330237
ENSMUSG00000003308	50868	Keap1	protein_coding	MGI Symbol	6	Kelch-like ECH-associated protein 1 [Source:UniProtKB/Swiss-Prot;Acc:Q9Z2X8]	-0.262651	-0.416763	-0.108539	0.00140194	0.00346931	-0.0606341	-0.187239	0.065971	0.33818	0.657181	-0.276441	-0.442833	-0.11005	0.00178566	0.00476187	-0.00863257	-0.127701	0.110436	0.884016	0.99766	-0.372325	-0.504703	-0.239948	1.59468e-06	8.21832e-06	0.0680298	-0.0671459	0.203206	0.314508	0.767636	0.0872518	-0.088909	0.263412	0.322133	0.584558	0.249256	0.0927309	0.405782	0.00262038	0.0174786	-0.0468442	-0.235014	0.141326
ENSMUSG00000003316	20340	Glg1	protein_coding	MGI Symbol	4	Golgi apparatus protein 1 [Source:UniProtKB/Swiss-Prot;Acc:Q61543]	-0.201657	-0.337058	-0.066255	0.00458805	0.00994741	-0.0238885	-0.134668	0.0868914	0.664726	0.859669	-0.196562	-0.341378	-0.0517459	0.00915803	0.019849	0.0236917	-0.0805941	0.127977	0.64801	0.988678	-0.248469	-0.364572	-0.132366	0.000106827	0.000337883	0.0532678	-0.065202	0.171738	0.368199	0.800663	0.075599	-0.0779461	0.229144	0.324975	0.587381	-0.0185622	-0.15637	0.119246	0.786447	0.873339	-0.0289831	-0.193401	0.135435
ENSMUSG00000003344	208198	Btbd2	protein_coding	MGI Symbol	5	BTB (POZ) domain containing 2 [Source:MGI Symbol;Acc:MGI:1933831]	-0.737325	-0.907653	-0.566997	1.41115e-10	3.5448e-09	0.0147516	-0.129087	0.15859	0.836537	0.937445	-0.803063	-0.989298	-0.616828	1.5566e-10	4.82472e-09	0.00402803	-0.130865	0.138922	0.952084	0.998763	-0.723819	-0.870866	-0.576773	4.79607e-12	1.71589e-10	-0.142114	-0.293943	0.00971565	0.0657198	0.430627	-0.0752161	-0.270434	0.120001	0.439985	0.685636	-0.0193906	-0.19132	0.152539	0.820515	0.896368	0.0804903	-0.126888	0.287868
ENSMUSG00000003345	103236	Csnk1g2	protein_coding	MGI Symbol	8	Casein kinase I isoform gamma-2 [Source:UniProtKB/Swiss-Prot;Acc:Q8BVP5]	-0.528042	-0.668927	-0.387157	4.57722e-09	5.98635e-08	0.104706	-0.00950306	0.218915	0.0712016	0.315373	-0.58497	-0.735713	-0.434226	2.04154e-09	3.87682e-08	0.0854757	-0.022514	0.193465	0.117278	0.9248	-0.365314	-0.486067	-0.244562	4.15208e-07	2.55559e-06	0.0407093	-0.0821875	0.163606	0.506307	0.883293	-0.13418	-0.294314	0.0259545	0.0979515	0.306382	0.000935306	-0.142844	0.144714	0.989555	0.993918	0.161634	-0.0102051	0.333472
ENSMUSG00000003346	216169	Abhd17a	protein_coding	MGI Symbol	4	abhydrolase domain containing 17A [Source:MGI Symbol;Acc:MGI:106388]	-0.628571	-0.833059	-0.424082	3.05546e-07	2.14377e-06	-0.0664143	-0.233178	0.10035	0.424887	0.723978	-0.744716	-0.964068	-0.525364	4.0612e-08	4.57044e-07	0.038474	-0.11838	0.195328	0.622155	0.986262	-0.7228	-0.898068	-0.547532	4.72875e-10	7.79343e-09	0.00373248	-0.174369	0.181834	0.96636	0.993948	0.0165578	-0.216317	0.249433	0.886238	0.954625	0.320854	0.113331	0.528378	0.00337709	0.021015	0.0497308	-0.199509	0.298971
ENSMUSG00000003348	208228	Mob3a	protein_coding	MGI Symbol	4	MOB kinase activator 3A [Source:UniProtKB/Swiss-Prot;Acc:Q8BSU7]	-0.984633	-1.32879	-0.640476	1.17401e-06	6.81575e-06	0.128731	-0.208515	0.465978	0.444213	0.738006	-0.536631	-0.964825	-0.108437	0.0154382	0.0311352	0.127869	-0.175444	0.431182	0.398523	0.983698	-0.454896	-0.760448	-0.149345	0.00460151	0.00958764	0.314186	-0.0384165	0.666789	0.0791526	0.46346	0.0461344	-0.383648	0.475917	0.829027	0.925758	-0.375534	-0.702566	-0.048503	0.0255602	0.0881207	-0.319271	-0.752928	0.114387
ENSMUSG00000003352	12297	Cacnb3	protein_coding	MGI Symbol	7	Mus musculus calcium channel, voltage-dependent, beta 3 subunit (Cacnb3), transcript variant 4, mRNA. [Source:RefSeq mRNA;Acc:NM_001356543]	0.391967	-0.297019	1.08095	0.256445	0.330928	-0.597614	-1.2089	0.0136665	0.055074	0.276183	-0.856441	-1.66844	-0.0444377	0.0392665	0.0695955	-0.374746	-1.01725	0.267758	0.244849	0.958943	-0.912725	-1.57109	-0.254356	0.00788789	0.0155095	-0.679422	-1.3698	0.0109596	0.0535587	0.389455	-0.318462	-1.14308	0.506152	0.438925	0.685052	-0.103877	-0.807216	0.599461	0.766438	0.860268	0.650794	-0.221208	1.5228
ENSMUSG00000003355	66120	Fkbp11	protein_coding	MGI Symbol	3	Peptidyl-prolyl cis-trans isomerase FKBP11 [Source:UniProtKB/Swiss-Prot;Acc:Q9D1M7]	-0.19497	-0.530695	0.140754	0.246852	0.32063	0.0516702	-0.244074	0.347414	0.725366	0.889822	0.340953	-0.110428	0.792334	0.134412	0.199043	0.0270849	-0.246808	0.300978	0.842302	0.994382	0.58374	0.261494	0.905987	0.000758101	0.00192746	-0.0881325	-0.392016	0.215751	0.56037	0.903212	-0.215702	-0.697958	0.266553	0.370684	0.626465	-0.458878	-0.841384	-0.076372	0.0200297	0.0737319	-0.484254	-0.962784	-0.0057228
ENSMUSG00000003360	74351	Ddx23	protein_coding	MGI Symbol	7	DEAD-box helicase 23 [Source:HGNC Symbol;Acc:HGNC:17347]	-0.130288	-0.252795	-0.0077798	0.0377487	0.0631918	-0.101018	-0.201424	-0.000612993	0.0486873	0.259543	-0.266648	-0.39806	-0.135236	0.00020931	0.00072411	0.0074651	-0.086902	0.101832	0.873537	0.997304	-0.136586	-0.24139	-0.0317823	0.0120438	0.0224408	-0.0280638	-0.135356	0.0792282	0.599316	0.916123	-0.122596	-0.261693	0.0165	0.0823282	0.279539	-0.00854741	-0.132638	0.115543	0.889768	0.937635	0.0353415	-0.113642	0.184325
ENSMUSG00000003363	18807	Pld3	protein_coding	MGI Symbol	8	Phospholipase D3 [Source:UniProtKB/Swiss-Prot;Acc:O35405]	-0.833724	-1.05837	-0.609078	5.73284e-09	7.28496e-08	0.0607824	-0.127692	0.249257	0.51754	0.77943	-0.9027	-1.14642	-0.65898	6.00073e-09	9.23358e-08	0.010184	-0.166331	0.186699	0.907578	0.998135	-0.546417	-0.740009	-0.352824	1.49782e-06	7.77912e-06	0.0531825	-0.147015	0.25338	0.593646	0.915084	-0.3461	-0.602459	-0.0897406	0.00950435	0.0827223	-0.161365	-0.38846	0.0657296	0.158364	0.312169	0.129759	-0.142899	0.402416
ENSMUSG00000003378	14809	Grik5	protein_coding	MGI Symbol	7	Glutamate receptor ionotropic, kainate 5 [Source:UniProtKB/Swiss-Prot;Acc:Q61626]	-0.335434	-0.606946	-0.0639212	0.0168456	0.0312132	0.46184	0.228255	0.695425	0.000285706	0.0157032	-0.639598	-0.924533	-0.354663	5.62138e-05	0.000228426	-0.149879	-0.359931	0.060173	0.156678	0.934297	-1.08387	-1.30029	-0.867443	2.98849e-12	1.16202e-10	0.304807	0.0556798	0.553933	0.0178521	0.219839	0.294387	0.00472484	0.58405	0.04656	0.204213	0.00886675	-0.23012	0.247853	0.940485	0.966916	0.766004	0.449232	1.08278
ENSMUSG00000003379	12518	Cd79a	protein_coding	MGI Symbol	1	B-cell antigen receptor complex-associated protein alpha chain [Source:UniProtKB/Swiss-Prot;Acc:P11911]	-0.538291	-1.50791	0.431328	0.267918	0.343752	0.811753	-0.0308839	1.65439	0.0585474	0.285486	-0.891714	-1.81681	0.0333869	0.0584074	0.0982689	0.220234	-0.467749	0.908217	0.520619	0.983698	0.24894	-0.516708	1.01459	0.514138	0.585866	1.03144	0.153288	1.90959	0.0225815	0.249164	-0.920419	-1.90465	0.0638099	0.0659521	0.245844	-0.838082	-1.67477	-0.00139703	0.049638	0.139083	1.16518	0.123093	2.20726
ENSMUSG00000003380	14470	Rabac1	protein_coding	MGI Symbol	6	Prenylated Rab acceptor protein 1 [Source:UniProtKB/Swiss-Prot;Acc:Q9Z0S9]	-0.320445	-0.607418	-0.0334708	0.029624	0.0510577	-0.154206	-0.391472	0.0830612	0.195998	0.510605	-0.114511	-0.430653	0.20163	0.467651	0.556222	0.0366774	-0.186602	0.259957	0.741154	0.990955	-0.318086	-0.565297	-0.0708748	0.0130829	0.0241106	-0.028894	-0.281948	0.22416	0.818328	0.968156	0.240252	-0.0932219	0.573725	0.152805	0.389918	0.898938	0.601218	1.19666	4.31007e-07	6.15109e-05	-0.360139	-0.715108	-0.00516883
ENSMUSG00000003382	27049	Etv3	protein_coding	MGI Symbol	5	ETS translocation variant 3 [Source:UniProtKB/Swiss-Prot;Acc:Q8R4Z4]	-0.0267415	-0.202796	0.149313	0.760004	0.811159	0.100942	-0.0466719	0.248556	0.174194	0.487009	0.212885	0.00469964	0.421071	0.0452954	0.0788223	0.000586298	-0.13702	0.138192	0.993159	0.999934	0.0514563	-0.102135	0.205048	0.501506	0.574363	-0.087203	-0.242058	0.0676515	0.261222	0.731455	0.162015	-0.0570652	0.381095	0.142521	0.373803	0.165827	-0.0186718	0.350327	0.0766838	0.188046	-0.138685	-0.367915	0.0905456
ENSMUSG00000003402	19089	Prkcsh	protein_coding	MGI Symbol	5	protein kinase C substrate 80K-H [Source:MGI Symbol;Acc:MGI:107877]	-0.301846	-0.434703	-0.168989	4.75101e-05	0.000172833	0.0514092	-0.0566167	0.159435	0.341203	0.660683	-0.330342	-0.471467	-0.189217	3.10061e-05	0.000136487	-0.0549905	-0.156777	0.0467961	0.280767	0.971353	-0.0740365	-0.186562	0.0384891	0.190655	0.253303	0.0473352	-0.0681579	0.162828	0.411644	0.829362	-0.311296	-0.460352	-0.16224	0.000146243	0.00794027	-0.0569412	-0.190395	0.0765128	0.3929	0.570185	0.0799054	-0.0810221	0.240833
ENSMUSG00000003420	14132	Fcgrt	protein_coding	MGI Symbol	6	Mus musculus Fc receptor, IgG, alpha chain transporter (Fcgrt), transcript variant 2, mRNA. [Source:RefSeq mRNA;Acc:NM_001357117]	-0.262428	-0.468963	-0.0558931	0.01417	0.0268338	0.0303319	-0.137842	0.198506	0.71688	0.885549	-0.302305	-0.521493	-0.0831163	0.0081843	0.0180182	0.00339257	-0.155244	0.162029	0.965673	0.998763	-0.551793	-0.730139	-0.373446	2.69195e-07	1.74646e-06	0.11437	-0.0654997	0.294239	0.205641	0.672582	0.25288	0.0190311	0.486729	0.0348174	0.173572	0.65522	0.446224	0.864217	2.07667e-07	3.85282e-05	0.0702083	-0.179627	0.320044
ENSMUSG00000003421	66394	Nosip	protein_coding	MGI Symbol	10	Nitric oxide synthase-interacting protein [Source:UniProtKB/Swiss-Prot;Acc:Q9D6T0]	-0.70082	-0.900951	-0.500689	2.08932e-08	2.13317e-07	-0.025753	-0.200111	0.148605	0.766423	0.906823	-0.979993	-1.20034	-0.759647	7.07277e-11	2.6021e-09	0.00233763	-0.161305	0.16598	0.977066	0.998763	-0.532985	-0.708826	-0.357145	4.00388e-07	2.47611e-06	0.0353383	-0.149857	0.220533	0.701264	0.944662	-0.44467	-0.674222	-0.215119	0.000362633	0.013082	-0.161162	-0.363307	0.0409844	0.114732	0.250005	0.25342	0.0121646	0.494676
ENSMUSG00000003423	68845	Pih1d1	protein_coding	MGI Symbol	9	PIH1 domain-containing protein 1 [Source:UniProtKB/Swiss-Prot;Acc:Q9CQJ2]	-0.532494	-0.735015	-0.329973	5.07853e-06	2.44006e-05	-0.0686957	-0.238883	0.101492	0.418698	0.719955	-0.361137	-0.586962	-0.135312	0.00252448	0.00643734	0.0234051	-0.136634	0.183444	0.768656	0.990955	-0.387673	-0.563462	-0.211885	7.16364e-05	0.000237332	0.135886	-0.0461664	0.317938	0.138946	0.585248	0.049941	-0.187306	0.287188	0.672223	0.84325	0.594714	0.383851	0.805577	1.51809e-06	0.000134583	-0.240053	-0.491146	0.0110407
ENSMUSG00000003429	27207	Rps11	protein_coding	MGI Symbol	4	ribosomal protein S11 [Source:MGI Symbol;Acc:MGI:1351329]	-0.329141	-0.542891	-0.115391	0.00349417	0.00778501	-0.0775466	-0.251525	0.0964317	0.372329	0.683922	-0.528547	-0.756955	-0.30014	3.66054e-05	0.000157991	0.0284842	-0.135147	0.192115	0.726325	0.990955	-0.143215	-0.324984	0.0385541	0.11891	0.168664	-0.133277	-0.319915	0.0533602	0.156359	0.608312	-0.356848	-0.598581	-0.115115	0.00492082	0.0551116	0.132152	-0.0825875	0.346891	0.220279	0.389962	0.12186	-0.138122	0.381842
ENSMUSG00000003435	20924	Supt5	protein_coding	MGI Symbol	8	Transcription elongation factor SPT5 [Source:UniProtKB/Swiss-Prot;Acc:O55201]	-0.579257	-0.781414	-0.377099	1.14193e-06	6.65631e-06	-0.198658	-0.360913	-0.0364032	0.0177779	0.148568	-0.941482	-1.15694	-0.726022	1.11195e-10	3.72187e-09	0.0695736	-0.0826828	0.22183	0.360541	0.983698	-0.434287	-0.604877	-0.263697	8.596e-06	3.58153e-05	-0.0765398	-0.250337	0.0972574	0.378011	0.807682	-0.437621	-0.666404	-0.208838	0.000418764	0.0138033	-0.196274	-0.401035	0.00848721	0.0597549	0.158137	0.163567	-0.0833417	0.410475
ENSMUSG00000003437	54624	Paf1	protein_coding	MGI Symbol	10	RNA polymerase II-associated factor 1 homolog [Source:UniProtKB/Swiss-Prot;Acc:Q8K2T8]	-0.148825	-0.31381	0.0161606	0.0756678	0.116007	0.0234748	-0.113345	0.160294	0.730095	0.891728	-0.354715	-0.535044	-0.174386	0.000303527	0.000997444	0.0286204	-0.099902	0.157143	0.654495	0.988678	0.120718	-0.0223764	0.263813	0.0957693	0.13956	-0.0356652	-0.181346	0.110016	0.62282	0.923736	-0.446813	-0.637801	-0.255824	3.12591e-05	0.00377608	-0.383334	-0.552197	-0.21447	4.8065e-05	0.00108184	0.229365	0.0268334	0.431897
ENSMUSG00000003438	66525	Timm50	protein_coding	MGI Symbol	6	Mitochondrial import inner membrane translocase subunit TIM50 [Source:UniProtKB/Swiss-Prot;Acc:Q9D880]	-0.334091	-0.492194	-0.175987	0.000125898	0.000408884	-0.034561	-0.167865	0.0987426	0.602519	0.830462	-0.203393	-0.382524	-0.0242619	0.0271466	0.0507343	0.0238534	-0.101334	0.14904	0.701673	0.990395	-0.261902	-0.399616	-0.124188	0.000446962	0.00121041	-0.12348	-0.264366	0.0174054	0.0839843	0.473601	0.0823624	-0.105736	0.270461	0.380728	0.634241	0.0254501	-0.136712	0.187612	0.752294	0.852406	-0.165259	-0.363538	0.0330202
ENSMUSG00000003444	67224	Med29	protein_coding	MGI Symbol	1	Mediator of RNA polymerase II transcription subunit 29 [Source:UniProtKB/Swiss-Prot;Acc:Q9DB91]	-0.506267	-0.736473	-0.276062	7.43883e-05	0.000256969	-0.0464299	-0.25984	0.16698	0.661929	0.858763	-0.963838	-1.22411	-0.703562	6.02671e-09	9.26259e-08	-0.0829458	-0.285769	0.119878	0.412659	0.983698	-0.571885	-0.78054	-0.363229	2.51137e-06	1.21608e-05	0.0532039	-0.178774	0.285182	0.644889	0.928765	-0.474899	-0.739745	-0.210054	0.000843099	0.0202017	-0.128823	-0.358988	0.101342	0.264088	0.439212	0.411141	0.136926	0.685356
ENSMUSG00000003458	59287	Ncstn	protein_coding	MGI Symbol	6	Nicastrin [Source:UniProtKB/Swiss-Prot;Acc:P57716]	-0.380132	-0.535425	-0.22484	1.58965e-05	6.62967e-05	-0.0828988	-0.209538	0.0437409	0.19287	0.506635	-0.540755	-0.707086	-0.374424	1.00082e-07	9.59941e-07	0.00941058	-0.109661	0.128482	0.873655	0.997304	-0.259132	-0.391568	-0.126695	0.000322907	0.000903403	-0.0427717	-0.178151	0.0926079	0.526044	0.889636	-0.272213	-0.448358	-0.0960669	0.00339049	0.0447029	-0.155851	-0.313349	0.00164776	0.0523213	0.14439	0.0777235	-0.111338	0.266785
ENSMUSG00000003464	19298	Pex19	protein_coding	MGI Symbol	6	Peroxisomal biosis factor 19 [Source:UniProtKB/Swiss-Prot;Acc:Q8VCI5]	0.0282648	-0.118616	0.175145	0.69886	0.759824	0.0929102	-0.0279774	0.213798	0.127932	0.416404	-0.0915316	-0.248479	0.0654153	0.244895	0.327877	-0.0290238	-0.143131	0.0850837	0.609383	0.985861	-0.516806	-0.644852	-0.388761	7.99224e-10	1.22256e-08	0.072504	-0.0569517	0.20196	0.263779	0.732424	0.396251	0.228897	0.563605	2.62176e-05	0.00347436	0.171662	0.0193502	0.323974	0.0282289	0.0944392	0.212706	0.0349641	0.390449
ENSMUSG00000003477	21743	Inmt	protein_coding	MGI Symbol	2	Indolethylamine N-methyltransferase [Source:UniProtKB/Swiss-Prot;Acc:P40936]	0.282898	-0.210483	0.77628	0.252782	0.326981	-0.902166	-1.30271	-0.501621	5.36294e-05	0.00557187	-0.296208	-0.802122	0.209705	0.24308	0.326024	0.346778	-0.0232439	0.716801	0.0653973	0.832028	-0.519982	-0.939414	-0.100551	0.0164952	0.0295724	-0.566224	-0.999461	-0.132986	0.0118221	0.17585	0.570553	0.0274555	1.11365	0.0400066	0.187569	0.0416243	-0.45959	0.542839	0.867298	0.924756	-0.32306	-0.905243	0.259123
ENSMUSG00000003500	23917	Impdh1	protein_coding	MGI Symbol	10	Inosine-5'-monophosphate dehydrogenase 1 [Source:UniProtKB/Swiss-Prot;Acc:P50096]	-0.237828	-0.595023	0.119367	0.185526	0.251558	-0.215905	-0.543704	0.111894	0.190195	0.504816	-0.307474	-0.765101	0.150152	0.181645	0.25689	0.0905199	-0.221155	0.402195	0.55982	0.983698	-0.296347	-0.619843	0.0271476	0.0714121	0.107941	0.23844	-0.120803	0.597684	0.18688	0.649335	0.079393	-0.386364	0.54515	0.731779	0.878582	0.250061	-0.137874	0.637995	0.199607	0.365295	-0.146259	-0.625381	0.332863
ENSMUSG00000003518	72349	Dusp3	protein_coding	MGI Symbol	7	Dual specificity protein phosphatase 3 [Source:UniProtKB/Swiss-Prot;Acc:Q9D7X3]	0.0309961	-0.144772	0.206764	0.722907	0.780415	-0.172778	-0.31739	-0.0281658	0.0205056	0.160666	0.122859	-0.067282	0.313	0.198551	0.276465	-0.0144614	-0.150241	0.121319	0.83034	0.992854	-0.201919	-0.352774	-0.0510635	0.010081	0.0192447	0.0127149	-0.141501	0.166931	0.868245	0.978104	0.310316	0.109133	0.511499	0.0034449	0.0451453	0.1314	-0.0469605	0.309761	0.144003	0.291848	-0.264641	-0.479433	-0.0498492
ENSMUSG00000003526	19125	Prodh	protein_coding	MGI Symbol	7	Proline dehydrogenase 1, mitochondrial [Source:UniProtKB/Swiss-Prot;Acc:Q9WU79]	-0.825525	-1.21343	-0.437621	0.000114874	0.000378358	0.338837	0.0269346	0.650739	0.0340387	0.213556	-0.169717	-0.577909	0.238474	0.404978	0.49552	-0.0593171	-0.355866	0.237232	0.687621	0.989332	-0.346144	-0.676819	-0.0154697	0.0406862	0.0654679	-0.0514711	-0.388985	0.286043	0.759075	0.957358	0.11711	-0.316508	0.550728	0.587534	0.78801	-0.436686	-0.836528	-0.036844	0.0331516	0.105659	-0.31697	-0.785806	0.151865
ENSMUSG00000003527	27886	Dgcr14	protein_coding	MGI Symbol	1	protein DGCR14 isoform 2 [Source:RefSeq peptide;Acc:NP_001075102]	-0.485462	-0.699024	-0.2719	4.71565e-05	0.000171739	-0.113639	-0.310609	0.0833318	0.249912	0.576996	-0.609196	-0.866089	-0.352303	2.56258e-05	0.000115342	0.22961	0.0475507	0.41167	0.0148466	0.667388	0.00482374	-0.189697	0.199345	0.9602	0.968553	0.038889	-0.161573	0.239351	0.69654	0.943829	-0.38441	-0.65028	-0.11854	0.00578001	0.0606341	-0.32539	-0.548292	-0.102489	0.00536931	0.0288384	0.0100959	-0.259729	0.279921
ENSMUSG00000003528	13358	Slc25a1	protein_coding	MGI Symbol	6	Tricarboxylate transport protein, mitochondrial [Source:UniProtKB/Swiss-Prot;Acc:Q8JZU2]	-1.23676	-1.49108	-0.982453	6.66439e-12	3.44514e-10	0.270621	0.0697951	0.471446	0.00962721	0.107268	-1.00639	-1.27826	-0.734524	6.07752e-09	9.32964e-08	0.0953885	-0.0959722	0.286749	0.319078	0.975895	-0.582675	-0.79873	-0.36662	3.31521e-06	1.54928e-05	-0.0350496	-0.253643	0.183544	0.747117	0.953192	-0.328328	-0.618108	-0.0385473	0.0274546	0.150941	-0.296513	-0.558264	-0.0347618	0.0274824	0.0928738	0.0402469	-0.27321	0.353704
ENSMUSG00000003531	13353	Dgcr6	protein_coding	MGI Symbol	9		-0.557067	-0.793454	-0.32068	2.81021e-05	0.000109401	0.0538776	-0.146453	0.254208	0.589096	0.821746	-0.387693	-0.652227	-0.123159	0.00520724	0.0121325	0.0268793	-0.160411	0.21417	0.772849	0.990955	-0.424177	-0.628952	-0.219402	0.000162128	0.000488189	0.089446	-0.123145	0.302037	0.399448	0.822844	0.0633633	-0.213825	0.340552	0.645976	0.825165	0.216512	-0.0251079	0.458132	0.0775405	0.189646	-0.115497	-0.408284	0.177291
ENSMUSG00000003534	12305	Ddr1	protein_coding	MGI Symbol	12	Epithelial discoidin domain-containing receptor 1 [Source:UniProtKB/Swiss-Prot;Acc:Q03146]	-0.225061	-0.742211	0.292089	0.383611	0.466039	0.0564788	-0.4097	0.522657	0.807456	0.923192	-0.260825	-0.895866	0.374217	0.410664	0.501485	-0.173582	-0.615547	0.268383	0.431259	0.983698	-0.185214	-0.665206	0.294778	0.439309	0.514084	-0.186291	-0.679778	0.307196	0.449219	0.853051	-0.249193	-0.911263	0.412878	0.450549	0.693362	-0.120098	-0.672211	0.432015	0.661983	0.793309	0.0922424	-0.581107	0.765592
ENSMUSG00000003541	15937	Ier3	protein_coding	MGI Symbol	1	immediate early response 3 [Source:HGNC Symbol;Acc:HGNC:5392]	-1.31108	-2.03401	-0.588152	0.000748933	0.00198255	-0.35798	-1.1324	0.416442	0.355056	0.671577	-0.668639	-1.70044	0.363158	0.197273	0.27498	0.338126	-0.390807	1.06706	0.353403	0.981113	-0.147308	-0.88454	0.589924	0.687934	0.742413	-0.755416	-1.45993	-0.0509028	0.0362881	0.318147	-0.183205	-1.22088	0.854472	0.722596	0.87272	-0.890188	-1.65177	-0.128608	0.0231991	0.082005	-1.00042	-1.99415	-0.00669094
ENSMUSG00000003545	14282	Fosb	protein_coding	MGI Symbol	7	Protein fosB [Source:UniProtKB/Swiss-Prot;Acc:P13346]	2.71232	1.05219	4.37245	0.00208349	0.00492685	-1.60189	-2.75806	-0.445719	0.00792177	0.0980744	-0.169894	-2.09814	1.75835	0.859295	0.894921	0.65032	-0.556936	1.85757	0.282151	0.971353	1.28152	-0.186543	2.74958	0.0851881	0.125964	0.158286	-1.1209	1.43747	0.80343	0.96541	-0.801093	-2.90249	1.30031	0.444799	0.688312	-0.974495	-2.7128	0.763813	0.263333	0.438618	1.28033	-0.986265	3.54692
ENSMUSG00000003546	74764	Klc4	protein_coding	MGI Symbol	1	Mus musculus kinesin light chain 4 (Klc4), transcript variant 2, mRNA. [Source:RefSeq mRNA;Acc:NM_001357130]	-0.528167	-0.685347	-0.370986	5.04814e-08	4.5339e-07	-0.0133757	-0.141194	0.114443	0.833257	0.936173	-0.476559	-0.644415	-0.308702	1.34862e-06	8.936e-06	0.022436	-0.0978636	0.142736	0.707693	0.990955	-0.306933	-0.440831	-0.173035	4.18939e-05	0.000147927	-0.134623	-0.27161	0.00236439	0.0538794	0.390808	-0.147189	-0.325045	0.0306658	0.102012	0.312532	-0.10107	-0.260278	0.0581377	0.206352	0.373921	-0.0649838	-0.256148	0.12618
ENSMUSG00000003549	13870	Ercc1	protein_coding	MGI Symbol	10	DNA excision repair protein ERCC-1 [Source:UniProtKB/Swiss-Prot;Acc:P07903]	-0.330518	-0.555446	-0.10559	0.00510126	0.0109215	0.0205952	-0.182644	0.223835	0.838456	0.938634	-0.352899	-0.625406	-0.0803913	0.0125516	0.0260853	0.0270378	-0.161815	0.21589	0.773385	0.990955	-0.0369359	-0.241337	0.167465	0.716365	0.767357	0.202161	-0.0159965	0.420318	0.0683359	0.438159	-0.288925	-0.572429	-0.00542079	0.045989	0.202598	0.166759	-0.0826369	0.416154	0.183708	0.345071	0.0429756	-0.246069	0.33202
ENSMUSG00000003555	13074	Cyp17a1	protein_coding	MGI Symbol	3	Steroid 17-alpha-hydroxylase/17,20 lyase [Source:UniProtKB/Swiss-Prot;Acc:P27786]	0.190644	-0.740636	1.12192	0.680715	0.743457	0.311952	-0.455431	1.07933	0.41543	0.717915	0.19492	-0.845287	1.23513	0.706374	0.770211	0.262961	-0.447405	0.973327	0.457997	0.983698	-0.1692	-0.95306	0.61466	0.664412	0.722612	-0.530374	-1.3321	0.271349	0.188302	0.649557	0.627081	-0.464636	1.7188	0.251961	0.511481	-1.18215	-2.12398	-0.240309	0.0152943	0.0608351	0.307676	-0.858701	1.47405
ENSMUSG00000003559	57344	As3mt	protein_coding	MGI Symbol	1	Arsenite methyltransferase [Source:UniProtKB/Swiss-Prot;Acc:Q91WU5]	-0.20144	-0.462794	0.0599141	0.126884	0.18138	0.0743624	-0.142773	0.291498	0.492101	0.76483	0.206559	-0.0882683	0.501387	0.164118	0.235749	0.159102	-0.0443361	0.36254	0.121575	0.9248	0.0351306	-0.190575	0.260836	0.754267	0.800181	-0.408344	-0.638694	-0.177993	0.000948413	0.0413521	0.330531	0.0199195	0.641142	0.0376425	0.18071	-0.0325192	-0.299484	0.234445	0.806431	0.886858	-0.333637	-0.662394	-0.00487975
ENSMUSG00000003573	26558	Homer3	protein_coding	MGI Symbol	8	Homer protein homolog 3 [Source:UniProtKB/Swiss-Prot;Acc:Q99JP6]	-0.369757	-0.694894	-0.0446208	0.0269202	0.0470289	-0.162127	-0.467921	0.143666	0.289688	0.613365	-0.358622	-0.77872	0.0614754	0.0920276	0.144658	0.215172	-0.0693673	0.499711	0.133984	0.9248	-0.237107	-0.527817	0.0536023	0.106884	0.153925	0.146204	-0.172328	0.464736	0.358422	0.793917	0.0936567	-0.330645	0.517958	0.657328	0.83277	0.240906	-0.110985	0.592797	0.173715	0.33294	-0.173262	-0.607642	0.261118
ENSMUSG00000003575	382056	Crtc1	protein_coding	MGI Symbol	5	CREB-regulated transcription coactivator 1 [Source:UniProtKB/Swiss-Prot;Acc:Q68ED7]	-0.588728	-0.767885	-0.409571	8.03285e-08	6.80958e-07	-0.0512939	-0.208156	0.105568	0.511743	0.775949	-0.832409	-1.03246	-0.632355	3.79664e-10	9.72524e-09	0.0197682	-0.127562	0.167098	0.78725	0.992038	-0.689732	-0.846048	-0.533415	8.6698e-11	1.90838e-09	-0.00339996	-0.169284	0.162484	0.9671	0.993948	-0.122909	-0.329671	0.0838526	0.236079	0.494349	-0.185762	-0.36384	-0.00768335	0.041351	0.123086	0.192388	-0.0255879	0.410363
ENSMUSG00000003581	71673	Rnf215	protein_coding	MGI Symbol	4	RING finger protein 215 [Source:UniProtKB/Swiss-Prot;Acc:Q5SPX3]	-0.144136	-0.366626	0.0783534	0.197408	0.265206	-0.0482824	-0.242464	0.145899	0.61741	0.837634	0.0624932	-0.217885	0.342871	0.654204	0.726477	-0.148212	-0.333576	0.0371507	0.113713	0.918978	-0.241006	-0.44308	-0.0389326	0.0207133	0.0360884	-0.023853	-0.234971	0.187265	0.820198	0.968156	0.155287	-0.136408	0.446982	0.287744	0.549745	0.301325	0.0565795	0.546071	0.0171981	0.0661151	-0.254912	-0.555589	0.0457656
ENSMUSG00000003585	67815	Sec14l2	protein_coding	MGI Symbol	6	SEC14-like protein 2 [Source:UniProtKB/Swiss-Prot;Acc:Q99J08]	0.340307	0.139711	0.540904	0.00146533	0.00360831	-0.0533571	-0.219781	0.113067	0.519981	0.780873	-0.225981	-0.441371	-0.010591	0.0402545	0.071031	-0.0385992	-0.19492	0.117721	0.61984	0.98603	-0.112335	-0.285401	0.0607306	0.196561	0.259767	-0.100305	-0.278706	0.0780963	0.26196	0.732015	-0.152245	-0.38008	0.075589	0.183979	0.433148	0.181455	-0.0223174	0.385228	0.0793368	0.192588	0.512931	0.270167	0.755696
ENSMUSG00000003604	74268	Aven	protein_coding	MGI Symbol	3	Cell death regulator Aven [Source:UniProtKB/Swiss-Prot;Acc:Q9D9K3]	-0.0335044	-0.208949	0.141941	0.701039	0.761428	-0.0632328	-0.213628	0.0871622	0.399777	0.70422	0.0460677	-0.168985	0.261121	0.666801	0.736809	-0.0637201	-0.206106	0.0786654	0.37043	0.983698	-0.0832987	-0.240618	0.0740206	0.290313	0.36225	0.0179658	-0.143712	0.179644	0.823113	0.968156	0.0656462	-0.159573	0.290865	0.558412	0.769045	0.239988	0.0491982	0.430779	0.0150912	0.0601748	-0.142805	-0.376065	0.0904549
ENSMUSG00000003617	12870	Cp	protein_coding	MGI Symbol	16	Ceruloplasmin [Source:UniProtKB/Swiss-Prot;Acc:Q61147]	0.353721	0.103522	0.603919	0.00684056	0.0141485	-0.00801884	-0.21603	0.199993	0.938166	0.977797	0.248015	-0.0162936	0.512323	0.0650765	0.107721	-0.0365508	-0.232277	0.159176	0.707331	0.990955	0.499059	0.28677	0.711347	2.91233e-05	0.000106662	0.14624	-0.075182	0.367661	0.18901	0.650817	-0.287595	-0.564392	-0.0107983	0.0421185	0.193033	-0.193989	-0.443272	0.0552932	0.123373	0.263224	0.0976872	-0.200959	0.396333
ENSMUSG00000003623	74114	Crot	protein_coding	MGI Symbol	3	Peroxisomal carnitine O-octanoyltransferase [Source:UniProtKB/Swiss-Prot;Acc:Q9DC50]	1.03224	0.686937	1.37754	5.21098e-07	3.37531e-06	0.2953	-0.000610137	0.59121	0.0504503	0.264086	0.431808	0.0551251	0.808491	0.0257975	0.0485623	-0.0937789	-0.374732	0.187174	0.503071	0.983698	0.186991	-0.120341	0.494323	0.225447	0.292525	0.515301	0.202229	0.828373	0.00194689	0.0651657	0.151038	-0.245709	0.547786	0.445423	0.688312	1.1077	0.759524	1.45587	1.55045e-07	3.0978e-05	0.89573	0.479125	1.31234
ENSMUSG00000003644	20111	Rps6ka1	protein_coding	MGI Symbol	9	ribosomal protein S6 kinase polypeptide 1 [Source:MGI Symbol;Acc:MGI:104558]	-0.540623	-0.88315	-0.198096	0.0028317	0.00645408	-0.445494	-0.756464	-0.134524	0.00619797	0.0856309	-0.760916	-1.1725	-0.349333	0.000610196	0.00184551	-0.0642221	-0.369906	0.241462	0.672822	0.988678	-1.23506	-1.54504	-0.925088	1.09041e-09	1.579e-08	-0.479913	-0.809525	-0.150301	0.00547855	0.115037	0.409925	-0.00485561	0.824706	0.0526036	0.218294	-0.0975622	-0.435921	0.240797	0.562637	0.715387	-0.225201	-0.661118	0.210716
ENSMUSG00000003660	320632	Snrnp200	protein_coding	MGI Symbol	5	U5 small nuclear ribonucleoprotein 200 kDa helicase [Source:UniProtKB/Swiss-Prot;Acc:Q6P4T2]	0.0257513	-0.168837	0.220339	0.790095	0.834375	0.0535259	-0.1065	0.213552	0.502189	0.769967	0.0613103	-0.145068	0.267689	0.550914	0.634397	-0.0172605	-0.168203	0.133682	0.818063	0.992372	0.00177641	-0.164965	0.168518	0.982895	0.986465	0.0247618	-0.146787	0.196311	0.77158	0.959002	0.0422735	-0.175926	0.260473	0.696925	0.8578	-0.0360485	-0.233266	0.161168	0.713246	0.827622	0.0179668	-0.21623	0.252164
ENSMUSG00000003662	26371	Ciao1	protein_coding	MGI Symbol	5	Probable cytosolic iron-sulfur protein assembly protein CIAO1 [Source:UniProtKB/Swiss-Prot;Acc:Q99KN2]	0.0874111	-0.0452204	0.220043	0.189932	0.256755	-0.050541	-0.160553	0.0594709	0.357987	0.673119	-0.105562	-0.252214	0.0410898	0.153159	0.222516	-0.0199394	-0.123424	0.0835456	0.698495	0.990173	0.0566923	-0.0585289	0.171914	0.325292	0.398844	-0.0126836	-0.130033	0.104666	0.827866	0.969074	-0.182194	-0.33735	-0.0270373	0.0226136	0.136704	0.220588	0.083314	0.357861	0.00241891	0.0164301	0.142432	-0.0218702	0.306735
ENSMUSG00000003680	225895	Taf6l	protein_coding	MGI Symbol	13	TATA-box binding protein associated factor 6 like [Source:MGI Symbol;Acc:MGI:2444957]	-0.353317	-0.525783	-0.180851	0.000186083	0.000578702	0.0690943	-0.0799832	0.218172	0.353798	0.671058	-0.245475	-0.446294	-0.0446573	0.0179496	0.0354272	-0.0401301	-0.179296	0.0990358	0.562607	0.983698	-0.262792	-0.414561	-0.111024	0.00120073	0.00291365	0.0156185	-0.142053	0.17329	0.842037	0.972998	-0.0228133	-0.232562	0.186935	0.8268	0.924434	-0.0123263	-0.189539	0.164886	0.888694	0.937021	-0.0387475	-0.25749	0.179995
ENSMUSG00000003680	67706	Taf6l	protein_coding	MGI Symbol	13	TATA-box binding protein associated factor 6 like [Source:MGI Symbol;Acc:MGI:2444957]	-0.353317	-0.525783	-0.180851	0.000186083	0.000578702	0.0690943	-0.0799832	0.218172	0.353798	0.671058	-0.245475	-0.446294	-0.0446573	0.0179496	0.0354272	-0.0401301	-0.179296	0.0990358	0.562607	0.983698	-0.262792	-0.414561	-0.111024	0.00120073	0.00291365	0.0156185	-0.142053	0.17329	0.842037	0.972998	-0.0228133	-0.232562	0.186935	0.8268	0.924434	-0.0123263	-0.189539	0.164886	0.888694	0.937021	-0.0387475	-0.25749	0.179995
ENSMUSG00000003721	72999	Insig2	protein_coding	MGI Symbol	14	Insulin-induced 2 protein [Source:UniProtKB/Swiss-Prot;Acc:Q91WG1]	-0.337065	-0.686578	0.0124478	0.0582892	0.0923962	-0.144162	-0.426717	0.138394	0.307977	0.629972	-0.0319861	-0.393837	0.329865	0.858841	0.89452	-0.298923	-0.561523	-0.0363232	0.0267843	0.739109	-0.80891	-1.10446	-0.51336	2.57315e-06	1.24136e-05	-0.651067	-0.954078	-0.348056	0.000101377	0.0109716	0.478001	0.0915721	0.86443	0.0167191	0.11428	0.416344	0.0652478	0.767441	0.0214003	0.0772447	-0.449241	-0.865483	-0.0329981
ENSMUSG00000003731	16650	Kpna6	protein_coding	MGI Symbol	6	Importin subunit alpha-7 [Source:UniProtKB/Swiss-Prot;Acc:O35345]	0.110092	-0.0905595	0.310744	0.273455	0.349888	-0.0666217	-0.231961	0.0987181	0.419508	0.720655	0.0685147	-0.147418	0.284447	0.524278	0.610542	-0.088262	-0.243513	0.0669894	0.256769	0.96496	0.00791985	-0.164054	0.179894	0.926165	0.941673	-0.0336314	-0.209987	0.142725	0.701435	0.944662	-0.0276672	-0.255919	0.200585	0.807362	0.91478	-0.0537862	-0.257175	0.149602	0.595309	0.743249	-0.0250439	-0.269074	0.218986
ENSMUSG00000003746	17155	Man1a	protein_coding	MGI Symbol	8	mannosidase 1, alpha [Source:MGI Symbol;Acc:MGI:104677]	0.760038	0.600836	0.919239	1.09741e-11	4.96587e-10	-0.0500093	-0.183919	0.0839006	0.454055	0.742827	0.636378	0.468956	0.803799	3.31084e-09	5.74838e-08	-0.0262333	-0.152097	0.0996299	0.675261	0.988678	0.579035	0.442678	0.715392	2.28921e-10	4.30245e-09	0.127395	-0.0151392	0.26993	0.0782729	0.461845	0.0311093	-0.144338	0.206556	0.721452	0.872283	0.154256	-0.00379239	0.312304	0.0554627	0.149968	0.0736506	-0.114613	0.261914
ENSMUSG00000003752	233011	Itpkc	protein_coding	MGI Symbol	4	Inositol-trisphosphate 3-kinase C [Source:UniProtKB/Swiss-Prot;Acc:Q7TS72]	-0.000207399	-0.223143	0.222728	0.998506	0.998968	-0.357992	-0.557531	-0.158454	0.000838306	0.0290322	-0.391922	-0.670474	-0.11337	0.00708607	0.0159188	0.194017	0.00316038	0.384874	0.0465095	0.812438	-0.0756021	-0.278642	0.127438	0.45538	0.529455	0.0603317	-0.15145	0.272113	0.567316	0.906463	-0.122303	-0.409339	0.164734	0.393543	0.645892	0.148006	-0.097272	0.393284	0.229215	0.400432	0.0337221	-0.262041	0.329485
ENSMUSG00000003762	76889	Coq8b	protein_coding	MGI Symbol	7	coenzyme Q8B [Source:HGNC Symbol;Acc:HGNC:19041]	-0.220304	-0.503323	0.062715	0.123272	0.176977	-0.109457	-0.356627	0.137713	0.375397	0.685963	-0.628416	-0.950872	-0.30596	0.000338262	0.0010999	0.148151	-0.0827611	0.379062	0.201665	0.945507	-0.280216	-0.527314	-0.0331187	0.0273259	0.0461244	0.179802	-0.0820782	0.441681	0.172507	0.632156	-0.200049	-0.534287	0.134189	0.232943	0.490552	-0.370813	-0.652171	-0.0894544	0.0111866	0.0487629	0.298655	-0.0520373	0.649347
ENSMUSG00000003778	78656	Brd8	protein_coding	MGI Symbol	8	Bromodomain-containing protein 8 [Source:UniProtKB/Swiss-Prot;Acc:Q8R3B7]	0.200906	0.0231776	0.378635	0.0277905	0.0483542	-0.0113467	-0.159268	0.136575	0.877341	0.954993	0.154075	-0.0545639	0.362713	0.143072	0.210129	0.0221825	-0.116488	0.160853	0.747689	0.990955	0.307898	0.150505	0.465291	0.000323701	0.000905233	-0.046771	-0.202988	0.109446	0.547822	0.898967	-0.131641	-0.353165	0.0898836	0.236233	0.494433	-0.143983	-0.33134	0.0433726	0.127963	0.269161	0.0354851	-0.195246	0.266216
ENSMUSG00000003779	19348	Kif20a	protein_coding	MGI Symbol	2	Kinesin-like protein KIF20A [Source:UniProtKB/Swiss-Prot;Acc:P97329]	0.431133	-0.354047	1.21631	0.273099	0.349511	0.226203	-0.404326	0.856732	0.47189	0.752602	0.117591	-0.782847	1.01803	0.792795	0.841591	-0.0289656	-0.601068	0.543137	0.918851	0.998135	0.384294	-0.277046	1.04563	0.246581	0.315814	-0.512193	-1.11207	0.0876796	0.0919646	0.495704	-0.295668	-1.25528	0.663946	0.536293	0.753594	-0.23528	-1.02781	0.557255	0.551191	0.705391	0.539744	-0.475011	1.5545
ENSMUSG00000003808	66590	Farsa	protein_coding	MGI Symbol	6	Phenylalanine--tRNA ligase alpha subunit [Source:UniProtKB/Swiss-Prot;Acc:Q8C0C7]	-0.211613	-0.372936	-0.0502894	0.0115419	0.0224527	-0.216349	-0.355635	-0.0770638	0.00324779	0.0612655	-0.473348	-0.65995	-0.286746	9.10365e-06	4.62193e-05	0.0545528	-0.0775916	0.186697	0.40829	0.983698	-0.183345	-0.327585	-0.0391058	0.0141354	0.0257977	0.0612863	-0.0880174	0.21059	0.410935	0.828816	-0.23545	-0.430804	-0.0400962	0.0194987	0.124765	-0.172153	-0.339713	-0.00459242	0.0443401	0.12868	0.045386	-0.158195	0.248967
ENSMUSG00000003809	270076	Gcdh	protein_coding	MGI Symbol	6	Glutaryl-CoA dehydrogenase, mitochondrial [Source:UniProtKB/Swiss-Prot;Acc:Q60759]	0.450619	0.202417	0.698821	0.000740455	0.00196171	0.00418983	-0.202693	0.211073	0.967491	0.988723	0.12114	-0.143419	0.385699	0.359563	0.449999	-0.0690999	-0.263645	0.125445	0.476272	0.983698	-0.298216	-0.514887	-0.0815453	0.00830519	0.0162195	0.361005	0.142718	0.579292	0.00186314	0.0636754	0.350256	0.0690261	0.631486	0.0160405	0.111222	0.450928	0.196925	0.704931	0.000934418	0.00842144	0.333669	0.0356835	0.631655
ENSMUSG00000003810	17776	Mast2	protein_coding	MGI Symbol	15	microtubule associated serine/threonine kinase 2 [Source:HGNC Symbol;Acc:HGNC:19035]	-0.704607	-0.871692	-0.537522	2.72283e-10	5.9732e-09	-0.0762468	-0.2164	0.0639061	0.277474	0.603408	-0.772877	-0.955516	-0.590237	2.49735e-10	7.02015e-09	-0.0531762	-0.185316	0.0789632	0.420095	0.983698	-0.600163	-0.744964	-0.455362	4.17919e-10	7.02137e-09	-0.289614	-0.43813	-0.141097	0.000335851	0.0234768	-0.22589	-0.417889	-0.0338905	0.0223726	0.136185	-0.182568	-0.352027	-0.0131078	0.0354602	0.110702	-0.007977	-0.212016	0.196062
ENSMUSG00000003812	13423	Dnase2a	protein_coding	MGI Symbol	9	Deoxyribonuclease-2-alpha [Source:UniProtKB/Swiss-Prot;Acc:P56542]	-0.550638	-0.780424	-0.320851	2.19397e-05	8.7779e-05	0.0345969	-0.165588	0.234782	0.728211	0.890767	-0.60679	-0.865799	-0.347781	3.06318e-05	0.000135036	-0.00637399	-0.193365	0.180617	0.945312	0.998763	-0.268531	-0.472058	-0.065003	0.0111054	0.0209174	-0.0893927	-0.298869	0.120083	0.392822	0.81867	-0.344633	-0.615822	-0.0734444	0.0141559	0.104456	0.099448	-0.140235	0.339131	0.405946	0.582415	0.0907493	-0.191764	0.373262
ENSMUSG00000003813	19358	Rad23a	protein_coding	MGI Symbol	7	RAD23 homolog A, nucleotide excision repair protein [Source:MGI Symbol;Acc:MGI:105126]	0.0605132	-0.122766	0.243793	0.507684	0.586435	0.090196	-0.0619071	0.242299	0.237207	0.563358	0.0901812	-0.115085	0.295447	0.379147	0.469532	0.0722452	-0.0702008	0.214691	0.310818	0.975777	0.013952	-0.144228	0.172132	0.859145	0.887717	0.0343992	-0.126996	0.195794	0.668374	0.935061	0.148474	-0.0680067	0.364956	0.17295	0.417725	-0.196021	-0.382698	-0.00934457	0.0400954	0.120593	0.060528	-0.168797	0.289853
ENSMUSG00000003814	12317	Calr	protein_coding	MGI Symbol	4	Calreticulin [Source:UniProtKB/Swiss-Prot;Acc:P14211]	-0.0261668	-0.253551	0.201217	0.816928	0.856429	-0.224758	-0.410255	-0.0392601	0.0189063	0.154171	-0.217114	-0.455822	0.0215943	0.0733706	0.119197	-0.242869	-0.415012	-0.0707265	0.00694489	0.633172	-0.0185839	-0.207339	0.170172	0.842984	0.874498	0.222887	0.0298646	0.415909	0.024802	0.263587	-0.441399	-0.692351	-0.190447	0.00102674	0.022261	-0.172367	-0.396892	0.0521588	0.128353	0.269589	-0.0338106	-0.306346	0.238725
ENSMUSG00000003824	71846	Syce2	protein_coding	MGI Symbol	4	Synaptonemal complex central element protein 2 [Source:UniProtKB/Swiss-Prot;Acc:Q505B8]	-0.10242	-0.432002	0.227162	0.532816	0.609717	0.056898	-0.230881	0.344677	0.691034	0.873681	0.00280561	-0.409689	0.4153	0.989079	0.992979	0.111288	-0.15188	0.374457	0.397081	0.983698	-0.152329	-0.431435	0.126777	0.275956	0.346935	0.130182	-0.167144	0.427508	0.380753	0.809766	0.266423	-0.156418	0.689264	0.209696	0.463389	0.423561	0.0743282	0.772793	0.0187984	0.0705591	-0.0483277	-0.491001	0.394345
ENSMUSG00000003847	54446	Nfat5	protein_coding	MGI Symbol	14	nuclear factor of activated T cells 5 [Source:MGI Symbol;Acc:MGI:1859333]	0.208304	-0.000533336	0.417142	0.0505582	0.0815651	-0.154146	-0.326218	0.017926	0.0776239	0.329566	0.013512	-0.209282	0.236306	0.902871	0.927877	0.113451	-0.0483989	0.275302	0.16391	0.934297	0.431479	0.253169	0.60979	1.89429e-05	7.2677e-05	0.115364	-0.0685914	0.299319	0.211792	0.680707	-0.304516	-0.53954	-0.0694922	0.0125093	0.0982431	-0.412227	-0.623174	-0.20128	0.000327707	0.00403024	0.0406466	-0.211626	0.292919
ENSMUSG00000003848	67619	Nob1	protein_coding	MGI Symbol	8	NIN1/RPN12 binding protein 1 homolog [Source:MGI Symbol;Acc:MGI:1914869]	-0.238765	-0.432457	-0.0450728	0.0170707	0.0315628	-0.210516	-0.385383	-0.0356494	0.0196289	0.157135	-0.263476	-0.508123	-0.0188287	0.0355226	0.0639229	-0.120045	-0.290056	0.049967	0.160926	0.934297	-0.317161	-0.499129	-0.135194	0.00112491	0.00274816	-0.0460894	-0.238679	0.1465	0.630632	0.925667	-0.0663595	-0.319461	0.186742	0.598454	0.793802	0.0365451	-0.174858	0.247948	0.728143	0.83759	-0.185805	-0.444244	0.0726336
ENSMUSG00000003849	18104	Nqo1	protein_coding	MGI Symbol	1	NAD(P)H dehydrogenase [quinone] 1 [Source:UniProtKB/Swiss-Prot;Acc:Q64669]	-0.213184	-0.662557	0.236189	0.342702	0.423954	0.0989736	-0.301795	0.499742	0.61979	0.838716	-0.248072	-0.788742	0.292598	0.358599	0.448922	0.0748566	-0.291214	0.440928	0.681046	0.988789	-0.822118	-1.18224	-0.461995	4.44054e-05	0.000155737	-0.23852	-0.632537	0.155498	0.227757	0.697942	0.648903	0.112242	1.18556	0.0191357	0.12321	0.144735	-0.254641	0.544112	0.467423	0.639023	0.133861	-0.443759	0.711481
ENSMUSG00000003865	14936	Gys1	protein_coding	MGI Symbol	6	Glycogen [starch] synthase, muscle [Source:UniProtKB/Swiss-Prot;Acc:Q9Z1E4]	-0.952431	-1.25863	-0.646236	2.42434e-07	1.75697e-06	0.0246992	-0.272291	0.321689	0.86711	0.950357	-0.650841	-1.02832	-0.27336	0.00125218	0.00349197	0.0613709	-0.212684	0.335425	0.652689	0.988678	-0.547533	-0.824466	-0.2706	0.000285795	0.000809161	-0.217578	-0.513911	0.0787555	0.145317	0.591935	-0.0419369	-0.421513	0.337639	0.824109	0.923921	-0.0651141	-0.373123	0.242895	0.670905	0.79973	-0.276891	-0.661657	0.107874
ENSMUSG00000003868	20174	Ruvbl2	protein_coding	MGI Symbol	8	RuvB-like protein 2 [Source:MGI Symbol;Acc:MGI:1342299]	-0.846338	-1.08451	-0.608168	1.51625e-08	1.65337e-07	-0.0307393	-0.248339	0.18686	0.776313	0.910992	-1.20942	-1.47174	-0.94709	2.77353e-11	1.25069e-09	0.0148821	-0.189069	0.218833	0.883273	0.99766	-0.673088	-0.885003	-0.461173	1.60249e-07	1.12071e-06	-0.0716045	-0.299169	0.15596	0.527718	0.890988	-0.521446	-0.790011	-0.252881	0.00035313	0.0128823	-0.0485577	-0.286975	0.189859	0.682251	0.80742	0.332339	0.052713	0.611965
ENSMUSG00000003873	12028	Bax	protein_coding	MGI Symbol	6	Apoptosis regulator BAX [Source:UniProtKB/Swiss-Prot;Acc:Q07813]	-0.82977	-1.06533	-0.594213	1.83665e-08	1.92514e-07	0.0661392	-0.145761	0.27804	0.531027	0.788049	-0.545076	-0.819378	-0.270774	0.000269209	0.000897385	-0.0308742	-0.228295	0.166546	0.753139	0.990955	-0.451534	-0.661966	-0.241101	0.000103201	0.000328256	-0.301128	-0.517571	-0.0846856	0.00768965	0.137615	-0.124416	-0.408227	0.159395	0.380179	0.633959	0.223825	-0.0234332	0.471082	0.0746851	0.184188	-0.218555	-0.511518	0.0744074
ENSMUSG00000003882	16197	Il7r	protein_coding	MGI Symbol	4	Interleukin-7 receptor subunit alpha [Source:UniProtKB/Swiss-Prot;Acc:P16872]	1.46776	0.726733	2.2088	0.000279762	0.000831411	-0.18152	-0.707773	0.344734	0.489018	0.762904	0.983401	0.0586796	1.90812	0.0377568	0.0673278	0.196287	-0.295711	0.688284	0.424075	0.983698	1.31976	0.684494	1.95502	0.000156278	0.000472877	0.277283	-0.285927	0.840494	0.325004	0.773291	-0.140069	-1.14834	0.8682	0.779927	0.901469	-0.101042	-0.933755	0.731671	0.807163	0.887306	0.302843	-0.758898	1.36458
ENSMUSG00000003923	21780	Tfam	protein_coding	MGI Symbol	5	transcription factor A, mitochondrial [Source:MGI Symbol;Acc:MGI:107810]	0.341885	0.184953	0.498816	8.44299e-05	0.000287565	-0.0154042	-0.145054	0.114245	0.811098	0.925031	0.29284	0.1141	0.471579	0.00203121	0.0053227	0.0991515	-0.0224965	0.220799	0.107111	0.908898	0.218256	0.0824951	0.354016	0.00240914	0.00540558	0.0474932	-0.0902847	0.185271	0.489293	0.872945	0.173735	-0.0148927	0.362364	0.0699553	0.254907	0.333835	0.170446	0.497225	0.000192278	0.00279019	0.0336407	-0.165774	0.233056
ENSMUSG00000003929	224694	Zfp81	protein_coding	MGI Symbol	1	zinc finger protein 81 [Source:MGI Symbol;Acc:MGI:1890752]	0.561852	0.212121	0.911583	0.00242415	0.00564202	0.156696	-0.11913	0.432522	0.257109	0.584265	0.909767	0.436685	1.38285	0.000394147	0.00126047	-0.0310855	-0.284049	0.221878	0.804759	0.992101	0.815704	0.498945	1.13246	7.14541e-06	3.03557e-05	-0.16028	-0.439258	0.118699	0.25186	0.724179	0.062978	-0.447073	0.573029	0.803844	0.913876	-0.151591	-0.549165	0.245983	0.444714	0.618229	-0.191219	-0.710871	0.328433
ENSMUSG00000003948	67468	Mmd	protein_coding	MGI Symbol	2	Monocyte to macrophage differentiation factor [Source:UniProtKB/Swiss-Prot;Acc:Q9CQY7]	0.711996	0.461423	0.962569	1.32841e-06	7.61346e-06	0.25282	0.0409435	0.464697	0.0206562	0.161409	0.213327	-0.0589038	0.485559	0.120857	0.181895	-0.106948	-0.307624	0.0937271	0.287226	0.972308	-0.111222	-0.332934	0.11049	0.316046	0.389435	0.282971	0.057426	0.508515	0.0153348	0.202597	0.217601	-0.0704881	0.505691	0.134427	0.360784	0.68686	0.430096	0.943624	3.80517e-06	0.000223454	0.751489	0.448166	1.05481
ENSMUSG00000003949	217082	Hlf	protein_coding	MGI Symbol	6	Hepatic leukemia factor [Source:UniProtKB/Swiss-Prot;Acc:Q8BW74]	0.825805	0.467994	1.18362	3.80215e-05	0.000142465	0.0708247	-0.227193	0.368842	0.632999	0.844541	-0.0272094	-0.415824	0.361405	0.887963	0.916837	-0.277407	-0.557049	0.00223589	0.0517658	0.82099	-0.143386	-0.452841	0.166069	0.35393	0.428019	0.0682577	-0.248036	0.384552	0.664485	0.934019	-0.16123	-0.571819	0.249359	0.431342	0.679093	-0.0533667	-0.420092	0.313358	0.769767	0.86236	0.92384	0.487679	1.36
ENSMUSG00000003955	70186	Fam162a	protein_coding	MGI Symbol	1	Protein FAM162A [Source:UniProtKB/Swiss-Prot;Acc:Q9D6U8]	0.261389	0.0661195	0.456658	0.0100752	0.0199461	-0.0253757	-0.187106	0.136354	0.752356	0.901409	0.158783	-0.0629023	0.380468	0.155146	0.224875	0.031168	-0.120724	0.183059	0.679999	0.988789	0.228193	0.0580223	0.398364	0.0099551	0.0190436	0.0599618	-0.112303	0.232227	0.485084	0.872461	-0.0382424	-0.27283	0.196345	0.743047	0.881919	0.117411	-0.0861441	0.320966	0.250018	0.423224	0.0772303	-0.16999	0.32445
ENSMUSG00000003970	26961	Rpl8	protein_coding	MGI Symbol	3	60S ribosomal protein L8 [Source:UniProtKB/Swiss-Prot;Acc:P62918]	-0.695138	-0.946718	-0.443559	2.18122e-06	1.17007e-05	-0.134874	-0.335728	0.0659812	0.181893	0.495352	-0.756996	-1.02238	-0.49161	1.23938e-06	8.27126e-06	0.0683326	-0.120466	0.257131	0.467995	0.983698	-0.672643	-0.88608	-0.459206	1.87272e-07	1.27804e-06	-0.0864166	-0.302326	0.129493	0.422595	0.835434	-0.0160208	-0.299464	0.267423	0.909448	0.963685	0.604234	0.352917	0.855552	2.08752e-05	0.000624669	-0.0730154	-0.378596	0.232565
ENSMUSG00000003992	66970	Ssbp2	protein_coding	MGI Symbol	9	Single-stranded DNA-binding protein 2 [Source:UniProtKB/Swiss-Prot;Acc:Q9CYZ8]	-0.117615	-0.491332	0.256101	0.527635	0.605069	0.297899	-0.0239765	0.619774	0.0686683	0.310905	0.502519	0.010312	0.994726	0.0456203	0.0792816	-0.286201	-0.585225	0.0128222	0.0601191	0.832028	0.523582	0.155669	0.891495	0.00651409	0.0130836	-0.031227	-0.377395	0.314941	0.855981	0.976598	-0.307264	-0.844119	0.22959	0.253633	0.513696	0.00376889	-0.458966	0.466504	0.986923	0.992194	-0.322236	-0.849804	0.205332
ENSMUSG00000004018	67030	Fancl	protein_coding	MGI Symbol	5	E3 ubiquitin-protein ligase FANCL [Source:UniProtKB/Swiss-Prot;Acc:Q9CR14]	0.326468	0.0142071	0.63873	0.04092	0.0677928	-0.00128523	-0.260479	0.257909	0.992038	0.997403	0.422237	0.0159645	0.828509	0.0420655	0.0738149	0.187964	-0.048747	0.424675	0.116142	0.923093	0.310263	0.0445943	0.575932	0.0233106	0.0400549	0.249705	-0.0201306	0.51954	0.0687007	0.438656	0.299938	-0.123861	0.723736	0.159982	0.400093	0.314704	-0.0278365	0.657246	0.0706303	0.1774	-0.0970535	-0.539075	0.344968
ENSMUSG00000004032	14866	Gstm5	protein_coding	MGI Symbol	6	Glutathione S-transferase Mu 5 [Source:UniProtKB/Swiss-Prot;Acc:P48774]	-0.937952	-1.16855	-0.707355	6.62349e-10	1.21325e-08	0.0326385	-0.18835	0.253627	0.766436	0.906823	-0.65146	-0.931476	-0.371443	3.38823e-05	0.000147364	-0.00392884	-0.209606	0.201748	0.969337	0.998763	-0.659544	-0.867694	-0.451393	1.68134e-07	1.16706e-06	-0.397557	-0.616802	-0.178313	0.000750089	0.036756	0.00415539	-0.277683	0.285994	0.97633	0.990073	-0.268245	-0.492575	-0.0439151	0.0204082	0.0746807	-0.253854	-0.541515	0.0338061
ENSMUSG00000004035	68312	Gstm7	protein_coding	MGI Symbol	5	Glutathione S-transferase Mu 7 [Source:UniProtKB/Swiss-Prot;Acc:Q80W21]	-0.926915	-1.20942	-0.644409	8.29175e-08	6.98936e-07	0.067069	-0.161428	0.295566	0.555668	0.802364	-0.703749	-1.0046	-0.402894	3.13193e-05	0.000137553	0.165603	-0.0497005	0.380907	0.127647	0.9248	-0.449915	-0.690234	-0.209597	0.000532045	0.00141014	-0.198697	-0.444212	0.046817	0.109527	0.536159	-0.0882306	-0.407466	0.231004	0.578878	0.781932	-0.360375	-0.648771	-0.0719787	0.0157183	0.0621032	-0.156097	-0.499772	0.187579
ENSMUSG00000004038	14864	Gstm3	protein_coding	MGI Symbol	1	Glutathione S-transferase Mu 3 [Source:UniProtKB/Swiss-Prot;Acc:P19639]	-2.45134	-3.10485	-1.79784	4.4929e-09	5.89983e-08	0.162383	-0.368618	0.693384	0.539332	0.792601	-0.238219	-0.942419	0.46598	0.497374	0.584508	0.309924	-0.181157	0.801004	0.208971	0.950593	0.211095	-0.333745	0.755934	0.437459	0.512196	-1.05189	-1.60428	-0.499495	0.000440528	0.0267343	-0.13939	-0.882079	0.603298	0.70593	0.863991	-0.840938	-1.48073	-0.201151	0.0113877	0.0494126	-2.05074	-2.85137	-1.25012
ENSMUSG00000004040	20848	Stat3	protein_coding	MGI Symbol	14	Signal transducer and activator of transcription 3 [Source:UniProtKB/Swiss-Prot;Acc:P42227]	-0.49726	-0.894307	-0.100213	0.0155026	0.0289895	-0.0144507	-0.334866	0.305965	0.927688	0.974443	-0.284384	-0.701067	0.132299	0.175011	0.249136	0.247075	-0.0569838	0.551133	0.108146	0.910508	0.0279109	-0.309556	0.365378	0.867836	0.894562	0.299987	-0.0448576	0.644831	0.0862286	0.481066	-0.0652203	-0.506873	0.376433	0.766467	0.895328	-0.131689	-0.531942	0.268563	0.50916	0.671516	-0.227327	-0.705454	0.2508
ENSMUSG00000004043	20850	Stat5a	protein_coding	MGI Symbol	7	signal transducer and activator of transcription 5A [Source:MGI Symbol;Acc:MGI:103036]	-1.09315	-1.39328	-0.793021	8.76328e-09	1.0403e-07	0.555984	0.288946	0.823021	0.000152035	0.0109693	-1.07836	-1.38993	-0.766789	2.69185e-08	3.21906e-07	-0.0164216	-0.251855	0.219011	0.888385	0.99766	-0.949091	-1.19542	-0.702763	2.41399e-09	3.09074e-08	-0.122402	-0.385137	0.140333	0.351345	0.789296	-0.145689	-0.465571	0.174193	0.362106	0.619884	0.358663	0.0749477	0.642379	0.0146297	0.0590418	0.541192	0.200833	0.881551
ENSMUSG00000004044	19285	Cavin1	protein_coding	MGI Symbol	2	Caveolae-associated protein 1 [Source:UniProtKB/Swiss-Prot;Acc:O54724]	0.178143	-0.120385	0.47667	0.234313	0.306756	0.0387979	-0.212163	0.289759	0.755872	0.903077	0.154937	-0.209871	0.519745	0.395061	0.48526	-0.0852651	-0.320831	0.1503	0.467964	0.983698	-0.00734655	-0.268873	0.25418	0.95492	0.9642	-0.193727	-0.455544	0.0680897	0.142307	0.588575	0.0770185	-0.305068	0.459105	0.685336	0.85173	-0.231201	-0.534684	0.0722815	0.131206	0.273496	0.0620034	-0.337023	0.46103
ENSMUSG00000004054	26403	Map3k11	protein_coding	MGI Symbol	1	Mitogen-activated protein kinase kinase kinase 11 [Source:UniProtKB/Swiss-Prot;Acc:Q80XI6]	-0.698056	-0.85334	-0.542771	5.36481e-11	1.67886e-09	-0.118498	-0.244337	0.00734053	0.0641765	0.300671	-0.989216	-1.15567	-0.822761	2.21568e-14	7.77706e-12	-0.000492197	-0.118786	0.117802	0.993319	0.999934	-0.557416	-0.689337	-0.425496	2.59203e-10	4.72127e-09	0.027436	-0.106889	0.161761	0.681394	0.939426	-0.432292	-0.608692	-0.255893	1.56206e-05	0.00267943	0.02115	-0.135635	0.177935	0.786135	0.873339	0.172662	-0.0170353	0.36236
ENSMUSG00000004056	11652	Akt2	protein_coding	MGI Symbol	14	Mus musculus thymoma viral proto-onco 2 (Akt2), transcript variant 4, mRNA. [Source:RefSeq mRNA;Acc:NM_001331109]	-0.402496	-0.540956	-0.264036	8.77758e-07	5.29468e-06	-0.107699	-0.220369	0.00497077	0.0604358	0.290651	-0.441773	-0.589464	-0.294082	5.15145e-07	3.85601e-06	-0.0147913	-0.120648	0.0910651	0.778679	0.990955	-0.353084	-0.470979	-0.235189	5.03235e-07	3.00207e-06	-0.099852	-0.220305	0.0206011	0.101458	0.516568	-0.10348	-0.260025	0.0530644	0.188638	0.43875	-0.125696	-0.266094	0.0147029	0.0777972	0.190023	-0.0684223	-0.236616	0.0997718
ENSMUSG00000004069	83945	Dnaja3	protein_coding	MGI Symbol	5	DnaJ homolog subfamily A member 3, mitochondrial [Source:UniProtKB/Swiss-Prot;Acc:Q99M87]	-0.00502389	-0.15552	0.145473	0.946441	0.959219	0.0790931	-0.0445713	0.202758	0.203052	0.519369	0.0884523	-0.0710374	0.247942	0.268395	0.353901	-0.111339	-0.227757	0.00507932	0.0603107	0.832028	-0.0982789	-0.226968	0.0304098	0.130291	0.182416	-0.0203369	-0.152528	0.111854	0.757021	0.956639	0.0753921	-0.0932628	0.244047	0.370957	0.62656	0.294649	0.143563	0.445736	0.000335533	0.00409253	-0.0143831	-0.195472	0.166706
ENSMUSG00000004070	15369	Hmox2	protein_coding	MGI Symbol	6	Mus musculus heme oxygenase 2 (Hmox2), transcript variant 3, mRNA. [Source:RefSeq mRNA;Acc:NM_001357050]	0.0942233	-0.102612	0.291058	0.33841	0.419244	0.0956602	-0.0676005	0.258921	0.24273	0.569926	0.297783	0.0735401	0.522026	0.0106349	0.0225531	-0.00872341	-0.161776	0.144329	0.908692	0.998135	0.370009	0.197611	0.542406	0.000102878	0.000327391	-0.0721352	-0.245406	0.101136	0.40438	0.82431	-0.080949	-0.318816	0.156918	0.494815	0.725453	0.145137	-0.0619872	0.352262	0.164051	0.319732	-0.1079	-0.357649	0.14185
ENSMUSG00000004071	66626	Cdip1	protein_coding	MGI Symbol	7	Mus musculus cell death inducing Trp53 target 1 (Cdip1), transcript variant 5, mRNA. [Source:RefSeq mRNA;Acc:NM_001358078]	-0.233748	-0.461795	-0.00570124	0.0448137	0.0733176	0.111476	-0.0746356	0.297588	0.232598	0.55723	-0.0280784	-0.268853	0.212696	0.814525	0.858344	-0.103216	-0.278666	0.0722353	0.240879	0.954715	-0.0873429	-0.2811	0.106414	0.366985	0.441381	-0.0562539	-0.255764	0.143256	0.571273	0.907871	-0.043951	-0.298374	0.210472	0.728327	0.876543	0.212683	-0.0151877	0.440555	0.0664563	0.170029	-0.0941935	-0.368675	0.180288
ENSMUSG00000004085	65964	Map3k20	protein_coding	MGI Symbol	6	Mitogen-activated protein kinase kinase kinase 20 [Source:UniProtKB/Swiss-Prot;Acc:Q9ESL4]	0.0221558	-0.160813	0.205125	0.807553	0.849549	-0.177273	-0.332036	-0.0225097	0.0259062	0.182522	-0.264479	-0.474911	-0.0540473	0.0151675	0.0306919	-0.0616593	-0.208829	0.0855106	0.40142	0.983698	-0.23428	-0.396169	-0.0723903	0.00574042	0.0116704	-0.165471	-0.33051	-0.000431984	0.0494335	0.372602	-0.0918587	-0.312835	0.129118	0.405073	0.65521	-0.224524	-0.412357	-0.0366901	0.0204502	0.0747709	0.109362	-0.122603	0.341326
ENSMUSG00000004096	66070	Cwc15	protein_coding	MGI Symbol	4	Spliceosome-associated [Source:UniProtKB/Swiss-Prot;Acc:Q9JHS9]	0.572683	0.381209	0.764158	5.16066e-07	3.34605e-06	0.0164511	-0.141124	0.174026	0.83364	0.936241	0.436357	0.221196	0.651517	0.000210627	0.000727503	-0.0744628	-0.222648	0.0737219	0.315239	0.975777	0.512525	0.345459	0.679591	3.17475e-07	2.01601e-06	-0.0586715	-0.22682	0.109477	0.484028	0.871854	-0.150631	-0.379206	0.0779434	0.189964	0.440215	-0.30695	-0.504499	-0.109401	0.00323868	0.0204079	0.152778	-0.088317	0.393872
ENSMUSG00000004098	53867	Col5a3	protein_coding	MGI Symbol	2	collagen, type V, alpha 3 [Source:MGI Symbol;Acc:MGI:1858212]	-0.59716	-0.93618	-0.258139	0.00101194	0.00259161	-0.137197	-0.411983	0.13759	0.318303	0.639313	-0.535786	-0.896473	-0.1751	0.0046837	0.0110454	-0.00716938	-0.265354	0.251015	0.955437	0.998763	-0.0206067	-0.307113	0.2659	0.884932	0.908723	-0.192806	-0.486735	0.101122	0.191967	0.655728	-0.522349	-0.903822	-0.140876	0.00861252	0.0781627	0.154634	-0.183921	0.493188	0.360752	0.538578	-0.19857	-0.610301	0.213161
ENSMUSG00000004099	13433	Dnmt1	protein_coding	MGI Symbol	7	DNA (cytosine-5)-methyltransferase 1 [Source:UniProtKB/Swiss-Prot;Acc:P13864]	-0.182809	-0.373977	0.00836041	0.0603372	0.0952009	0.122049	-0.0413575	0.285455	0.138694	0.434194	-0.0504838	-0.275597	0.174629	0.652223	0.725331	-0.0376861	-0.189448	0.114076	0.617865	0.98603	0.0675256	-0.102485	0.237536	0.426121	0.500627	-0.0327891	-0.203955	0.138377	0.700154	0.944509	-0.155695	-0.393493	0.0821021	0.19278	0.443435	-0.131964	-0.332391	0.0684645	0.190355	0.353728	-0.0102759	-0.256284	0.235732
ENSMUSG00000004100	235036	Ppan	protein_coding	MGI Symbol	7	Suppressor of SWI4 1 homolog [Source:UniProtKB/Swiss-Prot;Acc:Q91YU8]	-0.768706	-1.05548	-0.481934	3.6755e-06	1.84087e-05	-0.268031	-0.527807	-0.00825541	0.0434914	0.244089	-1.05358	-1.38091	-0.726248	1.22654e-07	1.13213e-06	0.0122411	-0.237158	0.26164	0.921323	0.998398	-0.546944	-0.809747	-0.28414	0.000152824	0.000463612	0.0724401	-0.210635	0.355516	0.607214	0.918086	-0.494393	-0.832047	-0.156739	0.0052453	0.0572925	-0.105558	-0.403339	0.192224	0.477145	0.647324	0.0168404	-0.3323	0.365981
ENSMUSG00000004105	26360	Angptl2	protein_coding	MGI Symbol	4	Angiopoietin-related protein 2 [Source:UniProtKB/Swiss-Prot;Acc:Q9R045]	-0.198646	-0.465263	0.0679712	0.139642	0.196887	0.161783	-0.065276	0.388842	0.157254	0.461528	-0.104367	-0.412751	0.204017	0.497187	0.584341	-0.0270358	-0.237091	0.183019	0.795717	0.992101	-0.19421	-0.424926	0.0365058	0.096474	0.140523	0.00636531	-0.231287	0.244017	0.957015	0.993948	0.0628073	-0.260004	0.385619	0.6957	0.857541	-0.528945	-0.792521	-0.265368	0.000239306	0.00325091	0.0675038	-0.271066	0.406074
ENSMUSG00000004127	108943	Trmt10a	protein_coding	MGI Symbol	6	tRNA methyltransferase 10A [Source:MGI Symbol;Acc:MGI:1920421]	0.33774	0.0781299	0.597349	0.0121836	0.0235215	-0.0405723	-0.256142	0.174997	0.705145	0.881312	0.452204	0.10677	0.797638	0.0116962	0.0245077	0.261086	0.0648109	0.457362	0.0105141	0.657642	0.472959	0.250565	0.695352	0.000115926	0.000363743	0.116634	-0.100752	0.334019	0.284043	0.7484	0.240332	-0.120583	0.601247	0.185479	0.434725	-0.373401	-0.636922	-0.10988	0.00672696	0.0338617	-0.155037	-0.529539	0.219465
ENSMUSG00000004187	16581	Kifc2	protein_coding	MGI Symbol	6	Mus musculus kinesin family member C2 (Kifc2), transcript variant 5, mRNA. [Source:RefSeq mRNA;Acc:NM_001358909]	-0.399281	-0.737912	-0.0606505	0.0220985	0.0394493	0.0623848	-0.239935	0.364705	0.678303	0.867488	-0.818434	-1.19348	-0.443388	8.25553e-05	0.000319541	-0.0533401	-0.335697	0.229017	0.704102	0.990781	-0.495064	-0.791249	-0.198879	0.00168735	0.00392366	-0.0611724	-0.378349	0.256004	0.698219	0.944131	-0.37671	-0.762274	0.008854	0.0552177	0.224242	0.359706	0.00751624	0.711896	0.0455419	0.130939	0.481538	0.0766512	0.886424
ENSMUSG00000004207	19156	Psap	protein_coding	MGI Symbol	5	prosaposin [Source:MGI Symbol;Acc:MGI:97783]	-0.249919	-0.419482	-0.0803566	0.00498152	0.0106934	-0.0206803	-0.158414	0.117054	0.762677	0.90501	-0.41997	-0.600056	-0.239883	3.27364e-05	0.000142859	-0.0321835	-0.161742	0.0973751	0.617744	0.98603	-0.677568	-0.823976	-0.53116	2.50867e-11	6.96157e-10	0.123804	-0.0228817	0.270489	0.0956244	0.502938	0.225415	0.0328508	0.417979	0.02301	0.1376	0.449995	0.276766	0.623224	6.20004e-06	0.000296384	0.14937	-0.0560857	0.354825
ENSMUSG00000004221	16151	Ikbkg	protein_coding	MGI Symbol	18	NF-kappa-B essential modulator [Source:UniProtKB/Swiss-Prot;Acc:O88522]	0.542837	0.312285	0.77339	2.84686e-05	0.000110662	-0.144793	-0.336215	0.0466284	0.133885	0.425141	0.511992	0.263357	0.760626	0.000174555	0.000616688	0.0502879	-0.129531	0.230107	0.574404	0.983698	0.5227	0.324623	0.720778	4.782e-06	2.13269e-05	0.102685	-0.101502	0.306871	0.314862	0.767764	0.0395791	-0.222564	0.301722	0.761397	0.893131	-0.0148256	-0.24736	0.217709	0.89792	0.942478	-0.113947	-0.393825	0.16593
ENSMUSG00000004233	70560	Wars2	protein_coding	MGI Symbol	5	tryptophanyl tRNA synthetase 2 (mitochondrial) [Source:MGI Symbol;Acc:MGI:1917810]	0.0674865	-0.138979	0.273952	0.511915	0.590482	-0.0503407	-0.228519	0.127838	0.5705	0.810179	0.174156	-0.0920009	0.440313	0.193048	0.269989	0.0619022	-0.104524	0.228328	0.455862	0.983698	0.0129582	-0.169235	0.195152	0.886204	0.909669	0.00472023	-0.181342	0.190783	0.959284	0.993948	0.2231	-0.0531901	0.49939	0.110303	0.325321	0.191331	-0.0319687	0.414631	0.0908714	0.211496	-0.15701	-0.442877	0.128856
ENSMUSG00000004263	13498	Atn1	protein_coding	MGI Symbol	3	Atrophin-1 [Source:UniProtKB/Swiss-Prot;Acc:O35126]	-1.01636	-1.31266	-0.720051	3.26418e-08	3.1355e-07	-0.121116	-0.359858	0.117625	0.310691	0.632634	-1.32733	-1.64522	-1.00945	3.48181e-10	9.07997e-09	0.00608155	-0.21841	0.230573	0.956524	0.998763	-0.667593	-0.91789	-0.417296	3.99868e-06	1.83048e-05	-0.0758699	-0.330788	0.179048	0.550184	0.899734	-0.653656	-0.990261	-0.317051	0.000352484	0.0128823	-0.536615	-0.838372	-0.234858	0.000918345	0.00832254	0.189858	-0.173253	0.55297
ENSMUSG00000004264	12034	Phb2	protein_coding	MGI Symbol	8	Prohibitin-2 [Source:UniProtKB/Swiss-Prot;Acc:O35129]	0.0786773	-0.0497751	0.20713	0.22242	0.293913	0.0102635	-0.0954554	0.115982	0.845144	0.941088	0.00324252	-0.133017	0.139503	0.961806	0.972666	0.0249936	-0.074722	0.124709	0.614588	0.98603	-0.0336859	-0.144014	0.0766417	0.539964	0.609678	0.0447239	-0.0686698	0.158118	0.429329	0.83973	0.0619221	-0.0822853	0.206129	0.389916	0.642608	-0.00279595	-0.133272	0.12768	0.965603	0.98063	0.0856982	-0.0688666	0.240263
ENSMUSG00000004266	15170	Ptpn6	protein_coding	MGI Symbol	11	protein tyrosine phosphatase, non-receptor type 6 [Source:MGI Symbol;Acc:MGI:96055]	-0.150148	-0.33738	0.0370846	0.112689	0.163758	0.189572	0.0324049	0.346739	0.0194114	0.156551	-0.103541	-0.314694	0.107613	0.326918	0.416122	0.0501768	-0.0954459	0.195799	0.48947	0.983698	0.0358769	-0.126097	0.197851	0.656218	0.714719	0.0317257	-0.132933	0.196385	0.698501	0.944131	-0.0892407	-0.311986	0.133505	0.422142	0.670624	-0.0309735	-0.222804	0.160857	0.745412	0.848511	0.142965	-0.0914289	0.377358
ENSMUSG00000004268	14791	Emg1	protein_coding	MGI Symbol	6	Ribosomal RNA small subunit methyltransferase NEP1 [Source:UniProtKB/Swiss-Prot;Acc:O35130]	-0.0260897	-0.223249	0.171069	0.790109	0.834375	-0.00340154	-0.167888	0.161085	0.966805	0.988723	0.288756	0.0594244	0.518088	0.0149982	0.0304299	-0.00225618	-0.156743	0.152231	0.976554	0.998763	0.00738255	-0.164469	0.179235	0.931112	0.944936	0.0748653	-0.10056	0.250291	0.3928	0.81867	0.279117	0.0377466	0.520488	0.0246085	0.141537	0.613164	0.402725	0.823604	8.40914e-07	9.17727e-05	-0.318247	-0.572036	-0.0644583
ENSMUSG00000004270	14792	Lpcat3	protein_coding	MGI Symbol	9	Lysophospholipid acyltransferase 5 [Source:UniProtKB/Swiss-Prot;Acc:Q91V01]	-0.802955	-1.01601	-0.589897	4.03353e-09	5.36716e-08	-0.06009	-0.230048	0.109868	0.478284	0.75726	-0.606896	-0.830619	-0.383173	2.99953e-06	1.7777e-05	0.209235	0.0484946	0.369976	0.0121384	0.667388	-0.516131	-0.697617	-0.334645	1.30805e-06	6.90554e-06	-0.183888	-0.368887	0.00111149	0.0513219	0.378703	0.11847	-0.120595	0.357534	0.321883	0.584456	-0.313661	-0.533122	-0.0941996	0.00630848	0.0322934	-0.256149	-0.514141	0.00184363
ENSMUSG00000004285	66144	Atp6v1f	protein_coding	MGI Symbol	3	ATPase, H+ transporting, lysosomal V1 subunit F [Source:MGI Symbol;Acc:MGI:1913394]	-0.867181	-1.06041	-0.673955	5.59897e-11	1.72308e-09	-0.0519459	-0.21561	0.111718	0.524152	0.783818	-0.725124	-0.937971	-0.512277	3.77508e-08	4.30817e-07	0.0488177	-0.104828	0.202463	0.523715	0.983698	-0.685815	-0.852845	-0.518785	5.26487e-10	8.56828e-09	-0.108273	-0.281008	0.0644622	0.212016	0.680707	0.00950882	-0.213192	0.23221	0.93153	0.971771	0.349222	0.15268	0.545763	0.00092613	0.0083587	-0.194002	-0.430337	0.0423317
ENSMUSG00000004317	12728	Clcn5	protein_coding	MGI Symbol	5	H(+)/Cl(-) exchange transporter 5 [Source:UniProtKB/Swiss-Prot;Acc:Q9WVD4]	0.491966	0.255841	0.728091	0.000150702	0.000479227	-0.204623	-0.39968	-0.00956655	0.0402772	0.23446	0.378152	0.073075	0.683229	0.0165114	0.0329847	0.0450089	-0.140707	0.230725	0.626312	0.987191	0.487748	0.271544	0.703953	5.24457e-05	0.000180427	0.253755	0.0389858	0.468525	0.0218455	0.243966	-0.0645874	-0.389127	0.259952	0.689115	0.853719	0.15655	-0.117354	0.430455	0.254279	0.427761	-0.0908096	-0.423646	0.242027
ENSMUSG00000004319	12725	Clcn3	protein_coding	MGI Symbol	10	H(+)/Cl(-) exchange transporter 3 [Source:UniProtKB/Swiss-Prot;Acc:P51791]	0.389168	0.213672	0.564665	6.64625e-05	0.000233094	-0.164341	-0.309511	-0.0191711	0.027578	0.188553	0.400003	0.206699	0.593307	0.000164235	0.000583881	0.0265057	-0.109899	0.16291	0.696066	0.990173	0.173506	0.0221491	0.324864	0.0257983	0.0438481	-0.217429	-0.372835	-0.0620223	0.00738336	0.135435	0.253003	0.048872	0.457133	0.0165207	0.113581	0.0453609	-0.133453	0.224175	0.610335	0.755682	-0.175176	-0.392181	0.0418295
ENSMUSG00000004328	53417	Hif3a	protein_coding	MGI Symbol	4	Hypoxia-inducible factor 3-alpha [Source:UniProtKB/Swiss-Prot;Acc:Q0VBL6]	-0.746493	-1.3947	-0.0982848	0.0251657	0.0443276	0.808389	0.235594	1.38119	0.00692878	0.0916863	-0.318215	-1.01259	0.37616	0.359166	0.449589	-0.0948829	-0.578626	0.38886	0.693359	0.989332	0.15936	-0.379395	0.698115	0.552629	0.621277	-0.194586	-0.729492	0.340319	0.465748	0.863233	-0.572458	-1.30622	0.161304	0.122452	0.34293	-0.837743	-1.42258	-0.252906	0.00620308	0.0319427	0.380111	-0.377672	1.13789
ENSMUSG00000004356	70683	Utp20	protein_coding	MGI Symbol	7	UTP20 small subunit processome component [Source:MGI Symbol;Acc:MGI:1917933]	0.673326	0.470471	0.876182	6.52602e-08	5.66155e-07	-0.138818	-0.304437	0.0268008	0.0978522	0.366755	0.55335	0.311303	0.795396	4.35217e-05	0.00018417	-0.0736207	-0.230203	0.0829614	0.346971	0.979365	0.449222	0.269811	0.628634	1.11875e-05	4.52625e-05	-0.029386	-0.206889	0.148118	0.739206	0.950126	0.0305067	-0.226898	0.287911	0.811562	0.917059	-0.013355	-0.229456	0.202746	0.901036	0.944218	-0.0188417	-0.287742	0.250059
ENSMUSG00000004359	20728	Spic	protein_coding	MGI Symbol	4	Transcription factor Spi-C [Source:UniProtKB/Swiss-Prot;Acc:Q6P3D7]	0.718109	0.0250355	1.41118	0.0426623	0.0702937	-0.098686	-0.652949	0.455577	0.720348	0.887011	0.178997	-0.666741	1.02474	0.670551	0.740333	0.179206	-0.333062	0.691474	0.482905	0.983698	0.48967	-0.101656	1.081	0.101809	0.147255	-0.0596881	-0.616343	0.496966	0.82921	0.969319	-0.131466	-1.0273	0.764369	0.767879	0.895997	-0.0595028	-0.792467	0.673462	0.870251	0.926693	0.440426	-0.502133	1.38298
ENSMUSG00000004364	26554	Cul3	protein_coding	MGI Symbol	6	Cullin-3 [Source:UniProtKB/Swiss-Prot;Acc:Q9JLV5]	0.528969	0.379581	0.678357	1.63922e-08	1.75973e-07	-0.0620003	-0.185971	0.06197	0.317503	0.638875	0.536985	0.374356	0.699614	7.27507e-08	7.35836e-07	0.0383306	-0.0783207	0.154982	0.509703	0.983698	0.400558	0.271711	0.529404	2.45113e-07	1.61424e-06	0.0231071	-0.109536	0.15575	0.72613	0.947421	0.174758	0.00317091	0.346345	0.0461187	0.202688	0.0250809	-0.126506	0.176668	0.739352	0.844043	-0.0700164	-0.252763	0.11273
ENSMUSG00000004383	16795	Large1	protein_coding	MGI Symbol	4	LARGE xylosyl- and glucuronyltransferase 1 Xylosyltransferase LARGE Beta-1,3-glucuronyltransferase LARGE [Source:UniProtKB/Swiss-Prot;Acc:Q9Z1M7]	0.0178954	-0.177531	0.213321	0.853829	0.8849	0.0253203	-0.143072	0.193712	0.762342	0.904948	0.00224827	-0.238481	0.242978	0.985005	0.98996	0.0190163	-0.137537	0.175569	0.806964	0.992101	-0.00146599	-0.172899	0.169967	0.98627	0.989301	-0.0217098	-0.196964	0.153545	0.803219	0.96526	0.0227305	-0.227931	0.273392	0.855232	0.938046	0.0894662	-0.11753	0.296463	0.386847	0.565001	0.0409674	-0.219391	0.301326
ENSMUSG00000004393	52513	Ddx56	protein_coding	MGI Symbol	4	Probable ATP-dependent RNA helicase DDX56 [Source:UniProtKB/Swiss-Prot;Acc:Q9D0R4]	0.000966105	-0.157396	0.159328	0.990205	0.992957	-0.0527486	-0.185674	0.0801764	0.42653	0.72533	0.0643159	-0.120414	0.249046	0.48498	0.572793	-0.0232189	-0.148359	0.101921	0.709124	0.990955	-0.11885	-0.257361	0.0196619	0.0904322	0.132702	-0.0268301	-0.168321	0.114661	0.703038	0.944662	0.159947	-0.0340905	0.353984	0.103325	0.314628	0.0854784	-0.0787062	0.249663	0.298344	0.475895	-0.116098	-0.319899	0.0877021
ENSMUSG00000004394	103694	Tmed4	protein_coding	MGI Symbol	3	Transmembrane emp24 domain-containing protein 4 [Source:UniProtKB/Swiss-Prot;Acc:Q8R1V4]	-0.241958	-0.416986	-0.06693	0.00805043	0.0163361	-0.232701	-0.376006	-0.0893955	0.00220261	0.0513928	-0.455484	-0.643415	-0.267552	1.84923e-05	8.64819e-05	0.0294382	-0.105168	0.164045	0.660277	0.988678	-0.395108	-0.54488	-0.245335	4.80663e-06	2.14146e-05	-0.0800266	-0.232987	0.0729339	0.296008	0.754114	-0.0309377	-0.230014	0.168138	0.754636	0.88919	-0.0233684	-0.20111	0.154373	0.791431	0.876558	-0.0191756	-0.232288	0.193936
ENSMUSG00000004446	12122	Bid	protein_coding	MGI Symbol	5	BH3-interacting domain death agonist BH3-interacting domain death agonist p15 BH3-interacting domain death agonist p13 BH3-interacting domain death agonist p11 [Source:UniProtKB/Swiss-Prot;Acc:P70444]	-0.0230696	-0.233182	0.187043	0.825186	0.862221	-0.111738	-0.293598	0.0701207	0.221002	0.543108	-0.307362	-0.555923	-0.0588016	0.016752	0.033376	0.0423707	-0.129094	0.213836	0.619576	0.98603	-0.0776331	-0.264837	0.109571	0.406188	0.480434	0.163046	-0.0330163	0.359108	0.100416	0.514135	-0.187358	-0.447027	0.0723098	0.152208	0.388965	0.334561	0.104195	0.564928	0.00558665	0.0295896	0.172554	-0.0973662	0.442475
ENSMUSG00000004451	64143	Ralb	protein_coding	MGI Symbol	3	Ras-related protein Ral-B [Source:UniProtKB/Swiss-Prot;Acc:Q9JIW9]	-0.062968	-0.259933	0.133997	0.521169	0.598976	0.181933	0.014321	0.349546	0.0341807	0.2138	0.312378	0.0672156	0.55754	0.0139233	0.0285479	0.070123	-0.082771	0.223017	0.35879	0.983698	0.211685	0.0396511	0.38372	0.0172562	0.0307754	-0.0490476	-0.219509	0.121414	0.563452	0.90463	0.170815	-0.0867184	0.428349	0.187175	0.437339	-0.352336	-0.55289	-0.151781	0.00103911	0.00913671	-0.193412	-0.459506	0.0726811
ENSMUSG00000004455	434233	Ppp1cc	protein_coding	MGI Symbol	10	Serine/threonine-protein phosphatase PP1-gamma catalytic subunit [Source:UniProtKB/Swiss-Prot;Acc:P63087]	-0.0854441	-0.362847	0.191959	0.53642	0.612807	0.0256221	-0.21666	0.267904	0.83152	0.935379	-0.197104	-0.532593	0.138386	0.241489	0.324291	0.0890437	-0.134274	0.312362	0.424338	0.983698	-0.0708972	-0.310947	0.169152	0.55323	0.621846	0.124326	-0.128676	0.377328	0.325902	0.774046	-0.0371628	-0.384014	0.309689	0.829341	0.926007	-0.0300076	-0.313717	0.253702	0.831496	0.902972	0.137282	-0.224388	0.498951
ENSMUSG00000004455	19047	Ppp1cc	protein_coding	MGI Symbol	10	Serine/threonine-protein phosphatase PP1-gamma catalytic subunit [Source:UniProtKB/Swiss-Prot;Acc:P63087]	-0.0854441	-0.362847	0.191959	0.53642	0.612807	0.0256221	-0.21666	0.267904	0.83152	0.935379	-0.197104	-0.532593	0.138386	0.241489	0.324291	0.0890437	-0.134274	0.312362	0.424338	0.983698	-0.0708972	-0.310947	0.169152	0.55323	0.621846	0.124326	-0.128676	0.377328	0.325902	0.774046	-0.0371628	-0.384014	0.309689	0.829341	0.926007	-0.0300076	-0.313717	0.253702	0.831496	0.902972	0.137282	-0.224388	0.498951
ENSMUSG00000004460	67838	Dnajb11	protein_coding	MGI Symbol	5	DnaJ homolog subfamily B member 11 [Source:UniProtKB/Swiss-Prot;Acc:Q99KV1]	0.51907	0.260066	0.778075	0.000243212	0.000732174	-0.251201	-0.466023	-0.0363804	0.0231461	0.171281	0.286697	0.0125426	0.560852	0.0408739	0.0719574	-0.170018	-0.369938	0.0299015	0.0932185	0.892964	0.316616	0.0975115	0.535721	0.00580482	0.0117841	0.238502	0.0133293	0.463675	0.038487	0.328404	-0.199937	-0.488381	0.0885062	0.168533	0.411184	0.36076	0.104623	0.616897	0.00703222	0.0350182	-0.0188284	-0.328822	0.291165
ENSMUSG00000004462	70573	Tbccd1	protein_coding	MGI Symbol	1	TBCC domain-containing protein 1 [Source:UniProtKB/Swiss-Prot;Acc:Q640P7]	0.142042	-0.0937215	0.377805	0.229931	0.301994	-0.0976129	-0.294935	0.0997088	0.322718	0.644097	-0.394708	-0.657636	-0.13178	0.00430498	0.0102623	-0.0673181	-0.253986	0.11935	0.469589	0.983698	-0.229369	-0.435098	-0.0236389	0.0298619	0.049835	0.143293	-0.0705154	0.357101	0.182724	0.643622	-0.232658	-0.509444	0.044129	0.0969341	0.304519	0.162038	-0.0818184	0.405894	0.186392	0.34855	0.439137	0.146256	0.732018
ENSMUSG00000004473	20256	Clec11a	protein_coding	MGI Symbol	1	C-type lectin domain family 11 member A [Source:UniProtKB/Swiss-Prot;Acc:O88200]	0.535702	0.163013	0.908391	0.00604348	0.0126693	-0.0510943	-0.353622	0.251433	0.73415	0.893035	0.341393	-0.127705	0.810491	0.148795	0.217001	-0.195822	-0.487491	0.0958476	0.181967	0.93701	-0.0653313	-0.385752	0.255089	0.681921	0.737149	-0.452333	-0.765936	-0.138729	0.00588724	0.117808	0.210902	-0.276593	0.698397	0.386398	0.639744	-0.308132	-0.672425	0.0561614	0.0949351	0.217946	0.143215	-0.373918	0.660348
ENSMUSG00000004500	243834	Zfp324	protein_coding	MGI Symbol	4	zinc finger protein 324 [Source:MGI Symbol;Acc:MGI:2444641]	0.318197	-0.136312	0.772706	0.164424	0.226757	-0.452545	-0.846865	-0.0582247	0.0256389	0.181946	-0.357034	-0.917981	0.203914	0.205199	0.283955	-0.014718	-0.404182	0.374746	0.939382	0.998763	-0.123006	-0.545179	0.299167	0.558564	0.62681	0.093524	-0.350922	0.53797	0.672332	0.936261	-0.248746	-0.832877	0.335386	0.393817	0.645968	-0.153801	-0.641789	0.334188	0.527043	0.686462	0.222686	-0.382088	0.82746
ENSMUSG00000004508	14389	Gab2	protein_coding	MGI Symbol	2		0.0572361	-0.350037	0.464509	0.777438	0.8248	0.248817	-0.0943978	0.592032	0.150323	0.45227	0.415851	-0.105281	0.936983	0.114414	0.173748	0.0492452	-0.258264	0.356754	0.74742	0.990955	0.290225	-0.0595102	0.63996	0.101112	0.146426	0.0492803	-0.296832	0.395393	0.774594	0.960074	0.174872	-0.37224	0.721984	0.521252	0.744392	-0.350808	-0.757485	0.0558679	0.0887923	0.208332	-0.109798	-0.675177	0.455581
ENSMUSG00000004530	23790	Coro1c	protein_coding	MGI Symbol	11	Coronin-1C [Source:UniProtKB/Swiss-Prot;Acc:Q9WUM4]	-0.383394	-0.584034	-0.182755	0.000423638	0.00119215	0.15165	-0.0175758	0.320875	0.0775232	0.329556	-0.181086	-0.407029	0.0448569	0.11289	0.171776	0.00375254	-0.153887	0.161392	0.961793	0.998763	-0.0889063	-0.263531	0.085718	0.308984	0.382024	0.040056	-0.13863	0.218743	0.652354	0.931918	-0.088427	-0.326531	0.149677	0.456547	0.697304	0.133807	-0.0737287	0.341344	0.199507	0.365216	-0.0506588	-0.300997	0.199679
ENSMUSG00000004535	52440	Tax1bp1	protein_coding	MGI Symbol	7	Tax1-binding [Source:UniProtKB/Swiss-Prot;Acc:Q3UKC1]	0.545262	0.396694	0.693831	7.38264e-09	8.99421e-08	-0.013268	-0.137396	0.11086	0.829738	0.93386	0.474568	0.317536	0.6316	4.23698e-07	3.27924e-06	-0.0183084	-0.135141	0.0985243	0.752653	0.990955	0.291148	0.163313	0.418984	4.59026e-05	0.000160381	0.0241986	-0.108599	0.156996	0.714091	0.945818	0.165111	-0.000270312	0.330493	0.0503566	0.214077	-0.0450494	-0.195187	0.105088	0.546949	0.701553	0.0574263	-0.119559	0.234411
ENSMUSG00000004552	13034	Ctse	protein_coding	MGI Symbol	3	cathepsin E [Source:MGI Symbol;Acc:MGI:107361]	-2.54672	-3.88638	-1.20707	0.000448958	0.00125471	-0.171925	-1.69698	1.35313	0.820591	0.929426	-3.56664	-4.90886	-2.22442	4.25755e-06	2.39986e-05	0.0816775	-1.36019	1.52355	0.909249	0.998135	-4.26929	-5.38023	-3.15835	2.56528e-09	3.25345e-08	0.00370319	-1.60755	1.61495	0.99631	0.998923	0.784332	-0.193799	1.76246	0.112717	0.328882	0.465786	-0.255699	1.18727	0.198928	0.364589	0.847992	-0.27914	1.97512
ENSMUSG00000004558	29811	Ndrg2	protein_coding	MGI Symbol	13	Protein NDRG2 Protein NDRG2, N-terminally processed [Source:UniProtKB/Swiss-Prot;Acc:Q9QYG0]	0.0415516	-0.180141	0.263245	0.70631	0.766256	0.0418888	-0.140618	0.224396	0.644645	0.851246	-0.413742	-0.652849	-0.174635	0.00120875	0.00338595	-0.0405507	-0.212538	0.131437	0.635677	0.988678	-0.144659	-0.335153	0.0458351	0.132406	0.184899	0.280434	0.0867517	0.474116	0.00571778	0.116208	-0.309634	-0.56238	-0.0568886	0.0177154	0.118166	0.226972	0.00277532	0.451169	0.0473699	0.134556	0.497183	0.226977	0.767388
ENSMUSG00000004561	52535	Mettl17	protein_coding	MGI Symbol	16	Methyltransferase-like protein 17, mitochondrial [Source:UniProtKB/Swiss-Prot;Acc:Q3U2U7]	-0.107213	-0.326776	0.112351	0.328926	0.409408	-0.0326453	-0.222143	0.156853	0.729044	0.891115	-0.50222	-0.75177	-0.252671	0.000231245	0.00079052	-0.0173372	-0.195511	0.160837	0.844794	0.994382	-0.405942	-0.59675	-0.215133	0.000115355	0.000362125	0.0191544	-0.182385	0.220693	0.848359	0.973978	-0.113616	-0.372337	0.145105	0.379355	0.633674	0.329446	0.101885	0.557006	0.00572318	0.0300797	0.362362	0.0892813	0.635444
ENSMUSG00000004562	268739	Arhgef40	protein_coding	MGI Symbol	26	Rho guanine nucleotide exchange factor 40 [Source:UniProtKB/Swiss-Prot;Acc:Q3UPH7]	-0.0557537	-0.294853	0.183345	0.639388	0.705859	0.161674	-0.0413447	0.364693	0.11513	0.396393	-0.163131	-0.437903	0.111641	0.236662	0.31893	0.0158836	-0.170625	0.202393	0.863951	0.996817	-0.262533	-0.464263	-0.0608033	0.0121557	0.02262	0.13606	-0.0770032	0.349124	0.203735	0.670907	0.115286	-0.170037	0.400608	0.418233	0.667192	0.463239	0.21629	0.710188	0.000520654	0.0055515	0.269051	-0.0333579	0.571461
ENSMUSG00000004565	50767	Pnpla6	protein_coding	MGI Symbol	20	Mus musculus patatin-like phospholipase domain containing 6 (Pnpla6), transcript variant 4, mRNA. [Source:RefSeq mRNA;Acc:NM_001359122]	-0.683086	-0.898342	-0.467828	1.63173e-07	1.24362e-06	-0.112133	-0.292187	0.0679203	0.214913	0.534883	-0.878861	-1.11326	-0.644459	4.5395e-09	7.37854e-08	0.0866448	-0.0826232	0.255913	0.306415	0.975777	-0.580667	-0.766275	-0.395059	2.16523e-07	1.44427e-06	-0.0418646	-0.232895	0.149165	0.659619	0.932685	-0.211549	-0.45801	0.0349112	0.0903235	0.293753	0.304627	0.0856566	0.523597	0.0076929	0.0375311	0.0836421	-0.17877	0.346055
ENSMUSG00000004567	94178	Mcoln1	protein_coding	MGI Symbol	11	Mucolipin-1 [Source:UniProtKB/Swiss-Prot;Acc:Q99J21]	-0.45817	-0.586709	-0.329631	1.41696e-08	1.56347e-07	0.0273705	-0.0790194	0.13376	0.60531	0.831564	-0.451452	-0.591314	-0.31159	1.15807e-07	1.08201e-06	-0.0220648	-0.122042	0.0779128	0.657378	0.988678	-0.393369	-0.504058	-0.282681	1.51301e-08	1.46638e-07	-0.0689848	-0.182308	0.0443385	0.225214	0.696394	-0.0801476	-0.227856	0.0675605	0.278708	0.54072	-0.0873417	-0.218132	0.0434489	0.184255	0.345648	0.0206523	-0.136716	0.178021
ENSMUSG00000004568	102098	Arhgef18	protein_coding	MGI Symbol	6	Rho guanine nucleotide exchange factor 18 [Source:UniProtKB/Swiss-Prot;Acc:Q6P9R4]	-0.455688	-0.637409	-0.273967	1.09266e-05	4.75709e-05	-0.0220283	-0.172494	0.128438	0.76842	0.907597	-0.485954	-0.683775	-0.288134	1.50537e-05	7.22209e-05	-0.000706761	-0.142159	0.140745	0.991977	0.999934	-0.326352	-0.482933	-0.169771	0.000150022	0.000456071	-0.0872403	-0.247477	0.0729962	0.277108	0.744326	-0.160309	-0.369215	0.0485972	0.128507	0.352167	0.146602	-0.0384557	0.33166	0.116975	0.253657	0.00823804	-0.214282	0.230758
ENSMUSG00000004591	109333	Pkn2	protein_coding	MGI Symbol	13	Serine/threonine-protein kinase N2 [Source:UniProtKB/Swiss-Prot;Acc:Q8BWW9]	0.837827	0.693298	0.982356	4.62218e-14	7.64443e-12	-0.118074	-0.237234	0.00108594	0.0520169	0.269355	0.886942	0.721351	1.05253	4.55801e-13	6.29732e-11	0.066464	-0.0456019	0.17853	0.23714	0.953764	0.785838	0.659957	0.911719	5.0563e-15	8.99537e-13	-0.0259262	-0.15325	0.101397	0.682314	0.939426	0.167569	-0.0076675	0.342805	0.0603429	0.235055	-0.174914	-0.323957	-0.0258708	0.0226867	0.0807497	-0.16719	-0.351878	0.0174987
ENSMUSG00000004609	12489	Cd33	protein_coding	MGI Symbol	6	Myeloid cell surface antigen CD33 [Source:UniProtKB/Swiss-Prot;Acc:Q63994]	0.981921	0.339554	1.62429	0.00371383	0.00822643	0.245933	-0.224578	0.716443	0.296455	0.619778	0.70426	-0.047922	1.45644	0.0656427	0.108447	-0.213865	-0.649396	0.221666	0.326249	0.97665	0.49295	-0.025616	1.01152	0.0618027	0.0949859	-0.204497	-0.69125	0.282255	0.400131	0.822918	-0.00255529	-0.805675	0.800564	0.994891	0.997888	-0.305273	-0.924886	0.314341	0.324659	0.503024	0.523594	-0.346482	1.39367
ENSMUSG00000004610	110826	Etfb	protein_coding	MGI Symbol	7	Electron transfer flavoprotein subunit beta [Source:UniProtKB/Swiss-Prot;Acc:Q9DCW4]	-0.142081	-0.380534	0.0963719	0.235001	0.307501	0.0579493	-0.137127	0.253026	0.550938	0.799445	-0.345247	-0.600179	-0.090315	0.00930201	0.0201043	-0.006639	-0.190751	0.177473	0.942153	0.998763	-0.335717	-0.54116	-0.130275	0.0020798	0.00474032	0.250837	0.0430845	0.458589	0.0192992	0.227853	-0.0161687	-0.286908	0.25457	0.904349	0.96223	0.561096	0.320799	0.801393	3.21388e-05	0.000815207	0.261115	-0.0283592	0.550589
ENSMUSG00000004612	72310	Nkg7	protein_coding	MGI Symbol	3	natural killer cell granule protein 7 [Source:HGNC Symbol;Acc:HGNC:7830]	0.595854	-0.0545358	1.24625	0.0713917	0.110416	-0.249933	-0.783829	0.283963	0.349045	0.667557	0.106744	-0.696496	0.909984	0.789237	0.83898	-0.201736	-0.72993	0.326458	0.443951	0.983698	0.0998851	-0.492712	0.692482	0.734659	0.783399	-0.00562662	-0.613397	0.602144	0.985136	0.997001	-0.194877	-1.04186	0.652104	0.643832	0.823869	0.0404695	-0.679791	0.76073	0.909982	0.949934	0.239178	-0.645784	1.12414
ENSMUSG00000004626	20911	Stxbp2	protein_coding	MGI Symbol	15	syntaxin binding protein 2 [Source:MGI Symbol;Acc:MGI:107370]	-0.747276	-0.871901	-0.622651	1.69788e-14	4.24744e-12	0.0418528	-0.0611723	0.144878	0.415743	0.717915	-0.653172	-0.788057	-0.518287	7.48211e-12	4.87927e-10	0.0510013	-0.0456772	0.14768	0.292069	0.972308	-0.694905	-0.801887	-0.587923	1.50577e-15	3.9111e-13	-0.113886	-0.223292	-0.00448018	0.0417571	0.341584	0.0927343	-0.049717	0.235185	0.195283	0.445587	-0.0781864	-0.204876	0.0485036	0.219003	0.38855	-0.0522514	-0.204275	0.0997726
ENSMUSG00000004631	20392	Sgce	protein_coding	MGI Symbol	13	Epsilon-sarcoglycan [Source:UniProtKB/Swiss-Prot;Acc:O70258]	-0.634266	-0.898885	-0.369648	2.18574e-05	8.74767e-05	-0.256466	-0.512235	-0.000697809	0.0494096	0.260953	-0.618171	-0.957897	-0.278445	0.000723085	0.002144	0.0581631	-0.187687	0.304013	0.63453	0.988678	0.161996	-0.110573	0.434566	0.23617	0.30428	-0.662097	-0.91288	-0.411314	4.74436e-06	0.00131096	-0.722004	-1.08154	-0.362469	0.000237358	0.0103916	-0.946496	-1.23863	-0.654362	1.0733e-07	2.75933e-05	-0.272562	-0.618999	0.0738763
ENSMUSG00000004633	69993	Chn2	protein_coding	MGI Symbol	15	Beta-chimaerin [Source:UniProtKB/Swiss-Prot;Acc:Q80XD1]	0.362832	0.181224	0.54444	0.000252444	0.000756633	0.0164864	-0.133475	0.166448	0.824963	0.931902	-0.0516552	-0.251609	0.148298	0.603815	0.682603	-0.0187612	-0.159701	0.122178	0.788892	0.992038	0.036435	-0.120355	0.193225	0.640536	0.701462	0.233001	0.072396	0.393606	0.00563198	0.116023	-0.106851	-0.318277	0.104574	0.312505	0.574061	-0.0712029	-0.256571	0.114165	0.441373	0.615893	0.430973	0.206308	0.655639
ENSMUSG00000004637	80707	Wwox	protein_coding	MGI Symbol	9	WW domain-containing oxidoreductase [Source:MGI Symbol;Acc:MGI:1931237]	-0.635127	-0.831721	-0.438532	1.13786e-07	9.1899e-07	0.151037	-0.026027	0.3281	0.0922684	0.356528	-0.487483	-0.716202	-0.258764	0.00011266	0.000417197	-0.178548	-0.344302	-0.0127932	0.0354874	0.781221	-0.553995	-0.72985	-0.378141	1.88667e-07	1.28688e-06	0.0551699	-0.136112	0.246452	0.562526	0.903912	-0.112036	-0.348177	0.124106	0.342662	0.602512	0.0911845	-0.110163	0.292532	0.364797	0.542558	0.00339336	-0.240759	0.247545
ENSMUSG00000004642	20492	Slbp	protein_coding	MGI Symbol	9	stem-loop binding protein [Source:MGI Symbol;Acc:MGI:108402]	-0.00969664	-0.235912	0.216519	0.931262	0.948201	-0.202407	-0.401208	-0.00360548	0.0461884	0.252666	0.107234	-0.190951	0.405418	0.470823	0.559431	0.162562	-0.0246121	0.349736	0.08672	0.877681	0.439455	0.225681	0.653228	0.000178296	0.000530841	-0.224839	-0.426362	-0.0233163	0.029752	0.288781	-0.169659	-0.48522	0.145902	0.28306	0.544904	-0.598472	-0.844594	-0.352351	1.75957e-05	0.000562844	-0.319337	-0.636457	-0.00221676
ENSMUSG00000004655	11826	Aqp1	protein_coding	MGI Symbol	1	Aquaporin-1 [Source:UniProtKB/Swiss-Prot;Acc:Q02013]	0.405733	0.0777238	0.733742	0.0167203	0.0310097	0.121018	-0.152159	0.394195	0.375225	0.685934	0.952851	0.602764	1.30294	2.83295e-06	1.69079e-05	-0.0817884	-0.339495	0.175918	0.524182	0.983698	0.508168	0.226947	0.789389	0.000777982	0.00197183	-0.0106027	-0.303338	0.282133	0.941898	0.992426	0.362895	-0.00484701	0.730636	0.0529396	0.218958	0.292722	-0.0345276	0.619972	0.0780476	0.19042	-0.4261	-0.820468	-0.0317326
ENSMUSG00000004661	56380	Arid3b	protein_coding	MGI Symbol	10	AT-rich interactive domain-containing protein 3B [Source:UniProtKB/Swiss-Prot;Acc:Q9Z1N7]	-0.699637	-0.9019	-0.497375	2.72539e-08	2.67938e-07	-0.0251466	-0.215971	0.165678	0.790959	0.917215	-0.697263	-0.939847	-0.454678	1.07914e-06	7.32612e-06	0.110368	-0.0663044	0.28704	0.213527	0.950593	-0.275537	-0.459608	-0.0914648	0.0044056	0.00923426	0.0473513	-0.150073	0.244776	0.629875	0.925655	-0.311358	-0.559383	-0.0633329	0.0152793	0.108439	0.0832429	-0.132623	0.299109	0.439599	0.614539	-0.0275214	-0.279202	0.224159
ENSMUSG00000004665	12798	Cnn2	protein_coding	MGI Symbol	2	Calponin-2 [Source:UniProtKB/Swiss-Prot;Acc:Q08093]	0.223785	-0.0513491	0.49892	0.10782	0.157616	0.0467098	-0.183728	0.277148	0.683676	0.869798	0.503296	0.143768	0.862823	0.00735331	0.0164311	-0.187178	-0.40589	0.0315346	0.0912413	0.892066	0.117008	-0.13117	0.365186	0.345661	0.419386	-0.123529	-0.370513	0.123455	0.317477	0.768689	0.19911	-0.179066	0.577286	0.293002	0.555262	-0.108787	-0.403497	0.185923	0.459256	0.631433	-0.2328	-0.622489	0.156888
ENSMUSG00000004667	66420	Polr2e	protein_coding	MGI Symbol	5	polymerase (RNA) II (DNA directed) polypeptide E [Source:MGI Symbol;Acc:MGI:1913670]	-0.682833	-0.917203	-0.448463	8.42204e-07	5.09916e-06	0.0288568	-0.16987	0.227583	0.77025	0.908537	-1.03633	-1.29103	-0.781634	6.56988e-10	1.52363e-08	-0.0793485	-0.266158	0.107461	0.395008	0.983698	-0.680087	-0.883509	-0.476665	5.6158e-08	4.55827e-07	-0.115182	-0.326047	0.0956827	0.275556	0.744232	-0.435595	-0.702717	-0.168472	0.00211989	0.0344569	-0.179498	-0.415948	0.0569518	0.13253	0.275431	0.382357	0.0989687	0.665745
ENSMUSG00000004677	17925	Myo9b	protein_coding	MGI Symbol	6	myosin IXB [Source:HGNC Symbol;Acc:HGNC:7609]	-0.171643	-0.33598	-0.00730607	0.04111	0.0680556	0.0507666	-0.0848496	0.186383	0.452994	0.742292	-0.19869	-0.377379	-0.0200015	0.0302737	0.0556181	0.0142329	-0.113324	0.141789	0.822392	0.992372	-0.0713468	-0.212933	0.0702399	0.313902	0.387109	0.0292137	-0.115607	0.174034	0.685113	0.939517	-0.11311	-0.30207	0.0758493	0.232888	0.490515	-0.0962679	-0.263782	0.071246	0.251728	0.424918	0.0778138	-0.123543	0.27917
ENSMUSG00000004698	79221	Hdac9	protein_coding	MGI Symbol	10	histone deacetylase 9 [Source:MGI Symbol;Acc:MGI:1931221]	0.705431	0.0303858	1.38048	0.0410084	0.0679133	0.263155	-0.25462	0.78093	0.309817	0.631845	0.80052	-0.042167	1.64321	0.0619704	0.10326	-0.213769	-0.691304	0.263766	0.370291	0.983698	0.610634	0.0184978	1.20277	0.0435954	0.0695204	0.0240325	-0.528308	0.576373	0.93023	0.990508	-0.0238819	-0.93641	0.888646	0.957998	0.982841	-0.341281	-1.05038	0.367817	0.335829	0.514196	0.168066	-0.779414	1.11555
ENSMUSG00000004707	17085	Ly9	protein_coding	MGI Symbol	5	T-lymphocyte surface antigen Ly-9 [Source:UniProtKB/Swiss-Prot;Acc:Q01965]	0.491542	-0.00081178	0.983895	0.0503598	0.0813258	0.140618	-0.254742	0.535978	0.475676	0.756132	0.787171	0.126283	1.44806	0.020871	0.0404141	-0.0917965	-0.457234	0.273641	0.613818	0.98603	0.480621	0.046122	0.91512	0.031091	0.051588	0.151693	-0.274429	0.577815	0.475291	0.867469	0.214754	-0.486686	0.916194	0.538862	0.755502	-0.272295	-0.794855	0.250266	0.297928	0.475408	-0.155011	-0.878112	0.568091
ENSMUSG00000004730	13733	Adgre1	protein_coding	MGI Symbol	2	Mus musculus adhesion G protein-coupled receptor E1 (Adgre1), transcript variant 2, mRNA. [Source:RefSeq mRNA;Acc:NM_001355722]	0.580502	0.0329627	1.12804	0.0383135	0.0639972	0.0824743	-0.360947	0.525896	0.708448	0.882977	1.10346	0.390714	1.81621	0.00333933	0.00823702	-0.0780142	-0.493696	0.337667	0.705938	0.990955	0.83765	0.34232	1.33298	0.00151062	0.00357219	0.0916801	-0.382416	0.565776	0.697457	0.944131	0.1878	-0.574154	0.949754	0.620479	0.808351	-0.0307549	-0.643264	0.581754	0.91952	0.955497	-0.440489	-1.22228	0.341298
ENSMUSG00000004748	67900	Mtfp1	protein_coding	MGI Symbol	2	Mitochondrial fission process protein 1 [Source:UniProtKB/Swiss-Prot;Acc:Q9CRB8]	-0.548454	-0.848643	-0.248265	0.000692584	0.00184624	-0.099437	-0.357028	0.158154	0.439123	0.734436	-0.467668	-0.809068	-0.126269	0.00858772	0.0187989	0.0919758	-0.14984	0.333792	0.445823	0.983698	-0.308999	-0.572341	-0.0456582	0.0227081	0.0391429	0.0597578	-0.213141	0.332657	0.659877	0.932685	-0.0666931	-0.423663	0.290276	0.707201	0.864741	-0.0803381	-0.388059	0.227383	0.599999	0.746664	-0.180223	-0.554808	0.194362
ENSMUSG00000004768	19335	Rab23	protein_coding	MGI Symbol	10	RAB23, member RAS oncogene family [Source:MGI Symbol;Acc:MGI:99833]	-0.203791	-0.496864	0.0892821	0.16722	0.230271	0.614032	0.367153	0.86091	1.24229e-05	0.00212284	0.734755	0.361838	1.10767	0.000297706	0.000982044	0.0149976	-0.198284	0.228279	0.887483	0.99766	0.52359	0.273014	0.774167	0.000145278	0.000442895	0.0993225	-0.143237	0.341882	0.41207	0.829698	0.226162	-0.16927	0.621595	0.253964	0.513703	-0.281554	-0.582251	0.0191424	0.0656289	0.16871	-0.324515	-0.729496	0.0804673
ENSMUSG00000004771	53869	Rab11a	protein_coding	MGI Symbol	9	RAB11A, member RAS oncogene family [Source:MGI Symbol;Acc:MGI:1858202]	0.0907509	-0.100097	0.281599	0.341586	0.422775	-0.109031	-0.266997	0.0489354	0.170302	0.48196	-0.14187	-0.351186	0.0674454	0.177936	0.252636	0.113627	-0.0349402	0.262194	0.129744	0.9248	-0.0155341	-0.180416	0.149347	0.849662	0.879703	-0.0772598	-0.245785	0.0912658	0.35899	0.794328	-0.0127094	-0.233904	0.208485	0.907955	0.963425	0.000104788	-0.194878	0.195087	0.999137	0.99938	0.123591	-0.111532	0.358713
ENSMUSG00000004788	217715	Eif2b2	protein_coding	MGI Symbol	7	Translation initiation factor eIF-2B subunit beta [Source:UniProtKB/Swiss-Prot;Acc:Q99LD9]	-0.756474	-0.924729	-0.588219	5.34447e-11	1.67654e-09	0.0697357	-0.0772156	0.216687	0.342555	0.662118	-0.83268	-1.01857	-0.646792	5.87907e-11	2.25785e-09	0.0352413	-0.101226	0.171709	0.60395	0.984352	-0.576548	-0.722611	-0.430486	1.36374e-09	1.91177e-08	0.0206183	-0.13327	0.174507	0.787551	0.960898	-0.22089	-0.413932	-0.0278478	0.0260509	0.146333	-0.0195381	-0.188239	0.149163	0.815777	0.893246	0.145942	-0.0572073	0.34909
ENSMUSG00000004789	78920	Dlst	protein_coding	MGI Symbol	13	Dihydrolipoyllysine-residue succinyltransferase component of 2-oxoglutarate dehydrogenase complex, mitochondrial [Source:UniProtKB/Swiss-Prot;Acc:Q9D2G2]	-0.0282109	-0.183565	0.127143	0.715035	0.77364	0.0428823	-0.0847102	0.170475	0.500152	0.768969	-0.105744	-0.270713	0.0592252	0.202077	0.280471	-0.00303776	-0.123403	0.117328	0.959495	0.998763	-0.388809	-0.523438	-0.25418	9.89547e-07	5.40195e-06	0.0298155	-0.107023	0.166654	0.661455	0.932685	0.280027	0.10438	0.455675	0.00259408	0.0383269	-0.0866747	-0.247673	0.0743239	0.282432	0.458607	0.120415	-0.0668543	0.307685
ENSMUSG00000004798	29869	Ulk2	protein_coding	MGI Symbol	3	unc-51 like kinase 2 [Source:MGI Symbol;Acc:MGI:1352758]	0.531783	0.326947	0.73662	6.26085e-06	2.92797e-05	0.0460563	-0.124964	0.217077	0.5886	0.821246	0.279869	0.0605799	0.499158	0.0137799	0.0282807	-0.0649283	-0.225972	0.0961154	0.419241	0.983698	0.294324	0.11785	0.470798	0.00172249	0.00399464	0.13364	-0.0485414	0.315821	0.145679	0.591935	-0.0793833	-0.310242	0.151475	0.490355	0.722202	0.143535	-0.0628398	0.34991	0.167132	0.323513	0.297971	0.0513995	0.544542
ENSMUSG00000004814	56221	Ccl24	protein_coding	MGI Symbol	2	C-C motif chemokine 24 [Source:UniProtKB/Swiss-Prot;Acc:Q9JKC0]	-1.00465	-1.65686	-0.352441	0.003484	0.00776501	0.711361	0.107094	1.31563	0.0222965	0.16784	-0.509339	-1.21971	0.201033	0.154726	0.224341	0.144566	-0.353195	0.642328	0.559816	0.983698	0.0871727	-0.455445	0.62979	0.746644	0.793573	-0.144251	-0.681649	0.393147	0.589812	0.91435	-0.451945	-1.19444	0.290547	0.225256	0.482024	-0.0167673	-0.664887	0.631352	0.95848	0.976788	0.216048	-0.535529	0.967626
ENSMUSG00000004815	110524	Dgkq	protein_coding	MGI Symbol	11	Diacylglycerol kinase theta [Source:UniProtKB/Swiss-Prot;Acc:Q6P5E8]	-0.445618	-0.679963	-0.211274	0.000447579	0.00125139	0.0294621	-0.170053	0.228977	0.766474	0.906823	0.0226775	-0.253057	0.298412	0.868568	0.901955	-0.0135701	-0.200494	0.173353	0.883864	0.99766	-0.166859	-0.373057	0.0393387	0.109566	0.157109	-0.207727	-0.416965	0.00151137	0.0515929	0.380055	0.175966	-0.113182	0.465114	0.225345	0.482054	0.238025	-0.00825321	0.484304	0.0577686	0.154279	-0.438834	-0.740729	-0.136938
ENSMUSG00000004837	71520	Grap	protein_coding	MGI Symbol	2	GRB2-related adapter protein [Source:UniProtKB/Swiss-Prot;Acc:Q9CX99]	0.0199523	-0.258927	0.298831	0.885535	0.911865	0.0957395	-0.144494	0.335973	0.424572	0.723978	0.00387732	-0.339659	0.347414	0.981879	0.987506	0.12423	-0.0936659	0.342126	0.255437	0.96496	0.434749	0.184831	0.684667	0.00114691	0.00279665	0.0818234	-0.162203	0.32585	0.501145	0.879985	-0.306642	-0.67133	0.0580468	0.0968328	0.304275	-0.343395	-0.639298	-0.0474912	0.0241361	0.084487	0.111814	-0.259775	0.483404
ENSMUSG00000004843	68942	Chmp2b	protein_coding	MGI Symbol	1	Charged multivesicular body protein 2b [Source:UniProtKB/Swiss-Prot;Acc:Q8BJF9]	0.532565	0.336634	0.728497	2.89872e-06	1.49506e-05	-0.095245	-0.255698	0.0652077	0.236734	0.563082	0.959619	0.702114	1.21712	5.21897e-09	8.25564e-08	0.0946791	-0.055938	0.245296	0.210739	0.950593	0.530834	0.357769	0.703899	3.18567e-07	2.02112e-06	-0.0302077	-0.19961	0.139194	0.719942	0.946018	0.523464	0.252217	0.79471	0.000378629	0.0132902	-0.337728	-0.54282	-0.132636	0.00193859	0.0140294	-0.522298	-0.803283	-0.241313
ENSMUSG00000004846	26433	Plod3	protein_coding	MGI Symbol	6	Procollagen-lysine,2-oxoglutarate 5-dioxygenase 3 [Source:UniProtKB/Swiss-Prot;Acc:Q9R0E1]	-0.437862	-0.58109	-0.294633	3.39706e-07	2.34419e-06	-0.229	-0.350478	-0.107523	0.000493035	0.0207165	-0.760756	-0.919536	-0.601976	9.96333e-12	6.04644e-10	0.0898629	-0.0248476	0.204573	0.120966	0.9248	-0.334611	-0.460002	-0.20922	3.96497e-06	1.81697e-05	-0.091849	-0.220621	0.0369231	0.156828	0.608704	-0.336282	-0.502941	-0.169623	0.000224041	0.00996447	0.0234618	-0.123862	0.170785	0.748772	0.850249	0.0938938	-0.0820853	0.269873
ENSMUSG00000004849	11769	Ap1s1	protein_coding	MGI Symbol	5	AP-1 complex subunit sigma-1A [Source:UniProtKB/Swiss-Prot;Acc:P61967]	-0.250038	-0.406258	-0.093819	0.00250547	0.0058032	0.0550843	-0.0777999	0.187968	0.406379	0.710411	-0.00412444	-0.187894	0.179645	0.963976	0.974207	0.0343516	-0.0894866	0.15819	0.577499	0.983698	-0.188712	-0.324655	-0.0527684	0.00781393	0.0153897	-0.190267	-0.328387	-0.0521463	0.00825459	0.142733	0.218939	0.0268033	0.411075	0.0266369	0.148661	0.0792168	-0.081431	0.239865	0.324246	0.502625	-0.19083	-0.39212	0.0104604
ENSMUSG00000004865	20815	Srpk1	protein_coding	MGI Symbol	7	SRSF protein kinase 1 [Source:UniProtKB/Swiss-Prot;Acc:O70551]	-0.0678046	-0.234706	0.0990967	0.415723	0.498339	-0.190185	-0.330001	-0.050368	0.00902205	0.104598	-0.214694	-0.402815	-0.0265731	0.0264195	0.0495465	0.0568356	-0.0750133	0.188685	0.388094	0.983698	-0.0187289	-0.164983	0.127525	0.796725	0.83552	-0.074369	-0.223065	0.0743266	0.317484	0.768689	-0.139129	-0.337612	0.0593536	0.163911	0.404911	-0.130335	-0.302732	0.0420616	0.13408	0.277454	-0.0432955	-0.252333	0.165742
ENSMUSG00000004880	98386	Lbr	protein_coding	MGI Symbol	8	Lamin-B receptor [Source:UniProtKB/Swiss-Prot;Acc:Q3U9G9]	0.0903802	-0.154721	0.335482	0.459723	0.540652	0.341889	0.138682	0.545096	0.00158599	0.0430905	0.661135	0.349337	0.972932	0.000120441	0.000442981	0.017352	-0.165591	0.200294	0.848661	0.994382	0.749075	0.529411	0.968739	3.69787e-08	3.14628e-07	0.277423	0.0650814	0.489765	0.0118496	0.17585	-0.0705884	-0.405255	0.264078	0.67161	0.843051	-0.257911	-0.5264	0.0105791	0.0592371	0.157067	-0.228865	-0.569452	0.111721
ENSMUSG00000004891	18008	Nes	protein_coding	MGI Symbol	3	Nestin [Source:UniProtKB/Swiss-Prot;Acc:Q6P5H2]	0.972589	0.524457	1.42072	8.88011e-05	0.000300328	-0.192609	-0.537707	0.152489	0.265408	0.591127	0.686245	0.100064	1.27243	0.0229982	0.0439425	-0.308288	-0.651659	0.0350826	0.0769889	0.859946	0.0953878	-0.299021	0.489797	0.627026	0.689575	-0.0879574	-0.482661	0.306746	0.654269	0.931918	0.282569	-0.334896	0.900035	0.359837	0.617864	-0.2526	-0.71027	0.20507	0.270667	0.446313	0.0937348	-0.558445	0.745915
ENSMUSG00000004895	94315	Prcc	protein_coding	MGI Symbol	1	papillary renal cell carcinoma (translocation-associated) [Source:MGI Symbol;Acc:MGI:2137738]	-0.19675	-0.350002	-0.0434976	0.013271	0.0253346	-0.0904465	-0.219628	0.0387346	0.164387	0.472949	-0.350433	-0.522642	-0.178225	0.000202072	0.000700564	-0.0802982	-0.202395	0.0417988	0.190848	0.941365	-0.038184	-0.174253	0.0978845	0.57309	0.640069	-0.041047	-0.17934	0.0972458	0.551268	0.899734	-0.392548	-0.574928	-0.210167	9.91117e-05	0.00633889	-0.11051	-0.270689	0.0496684	0.170481	0.328054	0.0632369	-0.127693	0.254167
ENSMUSG00000004896	229503	Rrnad1	protein_coding	MGI Symbol	12	ribosomal RNA adenine dimethylase domain containing 1 [Source:HGNC Symbol;Acc:HGNC:24273]	-0.242317	-0.423884	-0.0607488	0.0102834	0.0202964	-0.0947038	-0.254767	0.0653592	0.238238	0.564218	-0.322045	-0.539724	-0.104366	0.00483644	0.0113582	0.00236333	-0.148871	0.153598	0.974913	0.998763	-0.179691	-0.343587	-0.0157949	0.0325175	0.05366	-0.0448591	-0.214293	0.124575	0.594882	0.915084	-0.139991	-0.366649	0.0866678	0.218651	0.473665	0.00547414	-0.186879	0.197827	0.954331	0.974668	-0.0149753	-0.248921	0.218971
ENSMUSG00000004897	15191	Hdgf	protein_coding	MGI Symbol	6	Hepatoma-derived growth factor [Source:UniProtKB/Swiss-Prot;Acc:P51859]	-0.0203602	-0.154011	0.11329	0.759322	0.81063	-0.131606	-0.240933	-0.0222785	0.0196373	0.157135	-0.23014	-0.371443	-0.088836	0.00214367	0.00556462	0.0564136	-0.0463164	0.159144	0.27305	0.968937	0.0742261	-0.0390725	0.187525	0.192516	0.255305	-0.0300389	-0.14727	0.0871925	0.606749	0.918086	-0.247952	-0.397116	-0.0987884	0.00177675	0.0311282	-0.289332	-0.424281	-0.154382	0.000104304	0.00181824	0.0781737	-0.0826889	0.239036
ENSMUSG00000004902	71803	Slc25a18	protein_coding	MGI Symbol	1	solute carrier family 25 (mitochondrial carrier), member 18 [Source:MGI Symbol;Acc:MGI:1919053]	-0.339323	-0.717104	0.0384593	0.0768728	0.117591	-0.0489608	-0.393537	0.295616	0.775045	0.910284	-0.349798	-0.816893	0.117297	0.137683	0.203146	0.298752	-0.0141367	0.611641	0.0607089	0.832028	-0.148901	-0.468814	0.171012	0.351786	0.425783	0.60548	0.233988	0.976971	0.00212971	0.0682926	0.0978554	-0.373974	0.569685	0.676774	0.846035	0.197258	-0.192185	0.5867	0.311442	0.489318	-0.0384854	-0.530587	0.453616
ENSMUSG00000004929	50492	Thop1	protein_coding	MGI Symbol	5	thimet oligopeptidase 1 [Source:MGI Symbol;Acc:MGI:1354165]	-0.649149	-0.863957	-0.434342	4.23986e-07	2.83392e-06	0.230451	0.0380968	0.422805	0.0201848	0.159647	-0.602588	-0.84446	-0.360716	1.21019e-05	5.95108e-05	-0.0695086	-0.245914	0.106897	0.429775	0.983698	-0.670083	-0.854535	-0.485632	9.28728e-09	9.59537e-08	0.101939	-0.100487	0.304366	0.314207	0.767319	-0.00201309	-0.249815	0.245788	0.986957	0.994229	-0.0294599	-0.237083	0.178163	0.77535	0.865968	0.183889	-0.0761953	0.443974
ENSMUSG00000004931	57267	Apba3	protein_coding	MGI Symbol	11	Amyloid-beta A4 protein-binding family A member 3 [Source:UniProtKB/Swiss-Prot;Acc:O88888]	-0.719598	-0.886771	-0.552424	1.62745e-10	3.97288e-09	-0.149068	-0.287829	-0.0103069	0.0359571	0.219535	-0.751024	-0.93268	-0.569367	4.44691e-10	1.1149e-08	-0.0190681	-0.149917	0.111781	0.769456	0.990955	-0.779809	-0.923781	-0.635836	3.31509e-13	2.11044e-11	-0.00956794	-0.15785	0.138714	0.896697	0.983847	0.00971699	-0.181609	0.201043	0.9186	0.967839	0.422168	0.252458	0.591878	1.23912e-05	0.000445777	-0.117642	-0.321827	0.0865424
ENSMUSG00000004934	59004	Pias4	protein_coding	MGI Symbol	5	protein inhibitor of activated STAT 4 [Source:MGI Symbol;Acc:MGI:2136940]	-0.789055	-0.957667	-0.620442	1.86937e-11	7.4471e-10	0.0556742	-0.0917453	0.203094	0.449029	0.740514	-0.789018	-0.97645	-0.601586	2.84528e-10	7.71433e-09	0.107133	-0.029305	0.243571	0.12013	0.9248	-0.480809	-0.62705	-0.334568	7.94809e-08	6.1223e-07	0.0185624	-0.134523	0.171648	0.807297	0.966192	-0.201076	-0.395761	-0.00639217	0.0432888	0.196024	0.0955516	-0.0750983	0.266201	0.263896	0.439052	0.0556376	-0.148883	0.260158
ENSMUSG00000004936	26395	Map2k1	protein_coding	MGI Symbol	4	Dual specificity mitogen-activated protein kinase kinase 1 [Source:UniProtKB/Swiss-Prot;Acc:P31938]	0.294527	0.124113	0.46494	0.00122304	0.00307168	-0.0341169	-0.175073	0.106839	0.626757	0.841059	0.484068	0.291513	0.676623	1.05029e-05	5.24621e-05	0.0505199	-0.0820385	0.183078	0.444922	0.983698	0.290241	0.142478	0.438003	0.000308643	0.000867419	0.0917745	-0.0586923	0.242241	0.224328	0.695808	0.244347	0.0410264	0.447668	0.0198268	0.126159	0.356971	0.180251	0.533691	0.0002211	0.00307316	-0.223658	-0.438715	-0.00860111
ENSMUSG00000004937	52551	Sgta	protein_coding	MGI Symbol	7	small glutamine-rich tetratricopeptide repeat (TPR)-containing, alpha [Source:MGI Symbol;Acc:MGI:1098703]	-0.72358	-0.883624	-0.563538	4.62322e-11	1.48618e-09	-0.104243	-0.23282	0.0243341	0.108922	0.385232	-1.11873	-1.29057	-0.946883	1.40494e-15	3.02209e-12	0.0225678	-0.0982866	0.143422	0.707343	0.990955	-0.799849	-0.936183	-0.663515	3.24538e-14	3.48328e-12	-0.0198973	-0.157374	0.11758	0.770982	0.958969	-0.296308	-0.479368	-0.113249	0.00226669	0.0355955	-0.195008	-0.359695	-0.0303209	0.0215775	0.0777546	0.290901	0.0944042	0.487399
ENSMUSG00000004945	70544	Tmem242	protein_coding	MGI Symbol	3	Transmembrane protein 242 [Source:UniProtKB/Swiss-Prot;Acc:Q8VCR3]	0.172375	0.0134349	0.331314	0.034323	0.0581847	0.104181	-0.0275357	0.235899	0.117534	0.400135	0.26537	0.0817594	0.44898	0.0057974	0.0133188	-0.133645	-0.257346	-0.00994414	0.0349749	0.781221	-0.00765564	-0.145921	0.130609	0.911286	0.929319	-0.0729352	-0.213185	0.0673147	0.29888	0.754114	0.13938	-0.0543412	0.333102	0.15334	0.391012	0.258688	0.09254	0.424837	0.00318301	0.020183	0.0111862	-0.192836	0.215209
ENSMUSG00000004947	74198	Dtx2	protein_coding	MGI Symbol	9	Probable E3 ubiquitin-protein ligase DTX2 [Source:UniProtKB/Swiss-Prot;Acc:Q8R3P2]	-0.8257	-1.05842	-0.592985	1.56772e-08	1.69666e-07	-0.103055	-0.323585	0.117475	0.349886	0.668033	-0.954778	-1.22729	-0.682265	2.06625e-08	2.56111e-07	0.0532576	-0.154493	0.261008	0.606584	0.985144	-0.625321	-0.836691	-0.413952	6.33768e-07	3.66579e-06	0.183753	-0.0546553	0.422161	0.126887	0.567602	-0.276199	-0.551482	-0.000916535	0.0492804	0.2118	0.13202	-0.10882	0.37286	0.273892	0.449376	0.0260235	-0.256441	0.308489
ENSMUSG00000004951	15507	Hspb1	protein_coding	MGI Symbol	2	Heat shock protein beta-1 [Source:UniProtKB/Swiss-Prot;Acc:P14602]	-0.355581	-0.728005	0.0168432	0.0607204	0.0957126	-0.191756	-0.534677	0.151164	0.264518	0.590359	-0.61666	-1.06825	-0.165071	0.00878052	0.0191625	-0.364601	-0.708314	-0.020888	0.0382155	0.787487	-0.61186	-0.974787	-0.248932	0.00155558	0.00366716	-0.395288	-0.776632	-0.0139448	0.0425781	0.34431	-0.369401	-0.835781	0.0969785	0.117035	0.334714	0.496918	0.0608681	0.932969	0.026626	0.0906878	0.0693227	-0.405059	0.543704
ENSMUSG00000004952	54153	Rasa4	protein_coding	MGI Symbol	13	RAS p21 protein activator 4 [Source:MGI Symbol;Acc:MGI:1858600]	-0.162863	-0.650965	0.32524	0.503228	0.581858	-0.237892	-0.686602	0.210818	0.289704	0.613365	-0.820573	-1.39167	-0.249478	0.00606121	0.0138635	0.0152179	-0.41654	0.446976	0.943455	0.998763	-0.761766	-1.18679	-0.336739	0.000847194	0.00212741	0.0327032	-0.453515	0.518922	0.892345	0.983077	-0.0435886	-0.609612	0.522435	0.876863	0.950009	0.0173379	-0.44689	0.481566	0.940091	0.966868	0.419818	-0.18272	1.02236
ENSMUSG00000004980	53379	Hnrnpa2b1	protein_coding	MGI Symbol	13	Heteroous nuclear ribonucleoproteins A2/B1 [Source:UniProtKB/Swiss-Prot;Acc:O88569]	0.461687	0.283149	0.640225	6.67682e-06	3.09574e-05	0.0316733	-0.117322	0.180669	0.669189	0.86158	0.220887	0.0307512	0.411024	0.0239956	0.0456068	0.0582351	-0.0825482	0.199018	0.407365	0.983698	0.608384	0.455682	0.761085	1.09207e-09	1.57936e-08	0.0562522	-0.103931	0.216436	0.481237	0.870298	-0.329261	-0.528383	-0.130139	0.00186574	0.032051	-0.449754	-0.630171	-0.269338	1.19879e-05	0.000436097	0.272473	0.0583983	0.486547
ENSMUSG00000004994	67736	Ccdc130	protein_coding	MGI Symbol	7	Coiled-coil domain-containing protein 130 [Source:UniProtKB/Swiss-Prot;Acc:Q9D516]	-0.275866	-0.489488	-0.0622448	0.012781	0.0245296	0.0327646	-0.158405	0.223934	0.730374	0.891901	-0.495785	-0.745464	-0.246107	0.000271539	0.000904457	-0.0410535	-0.219784	0.137677	0.644391	0.988678	-0.236161	-0.42689	-0.0454325	0.0166186	0.0297691	-0.0125534	-0.214132	0.189025	0.900278	0.983948	-0.300678	-0.559081	-0.0422747	0.0237848	0.139423	-0.185351	-0.402033	0.0313308	0.0913907	0.212354	0.252684	-0.0145759	0.519943
ENSMUSG00000004996	67873	Mri1	protein_coding	MGI Symbol	5	Methylthioribose-1-phosphate isomerase [Source:UniProtKB/Swiss-Prot;Acc:Q9CQT1]	-0.703073	-0.894531	-0.511615	7.2884e-09	8.90665e-08	-0.0557483	-0.222121	0.110624	0.501429	0.769656	-0.659308	-0.875466	-0.44315	3.54985e-07	2.81624e-06	0.117135	-0.0382518	0.272522	0.135177	0.9248	-0.509739	-0.676466	-0.343012	3.39194e-07	2.13219e-06	-0.0288716	-0.202664	0.144921	0.738334	0.949975	-0.0324335	-0.256882	0.192015	0.771334	0.898192	0.212886	0.0171671	0.408605	0.0338289	0.106973	-0.0995136	-0.335523	0.136496
ENSMUSG00000005034	18749	Prkacb	protein_coding	MGI Symbol	8	protein kinase, cAMP dependent, catalytic, beta [Source:MGI Symbol;Acc:MGI:97594]	0.450845	0.323551	0.578139	1.63059e-08	1.75447e-07	-0.0637392	-0.169136	0.0416578	0.228208	0.55216	0.186688	0.0479455	0.325431	0.00972433	0.0208916	-0.0112774	-0.110383	0.0878282	0.818936	0.992372	0.177765	0.0678944	0.287636	0.00227553	0.0051404	0.0340866	-0.0784616	0.146635	0.543223	0.896025	-0.00235453	-0.148981	0.144272	0.974221	0.98924	-0.095073	-0.224877	0.0347307	0.146277	0.294938	0.200418	0.0443898	0.356446
ENSMUSG00000005043	27029	Sgsh	protein_coding	MGI Symbol	6	N-sulfoglucosamine sulfohydrolase (sulfamidase) [Source:MGI Symbol;Acc:MGI:1350341]	-0.357198	-0.612763	-0.101632	0.00743804	0.0152435	0.313214	0.0894834	0.536945	0.00735032	0.0944594	-0.23556	-0.52975	0.0586296	0.11322	0.172149	-0.071706	-0.274143	0.130731	0.477475	0.983698	-0.315354	-0.532027	-0.09868	0.00549482	0.0112221	-0.0345181	-0.262992	0.193956	0.761246	0.957541	0.00808741	-0.296074	0.312249	0.957328	0.982676	-0.0568422	-0.306179	0.192494	0.646867	0.782632	0.191577	-0.127494	0.510647
ENSMUSG00000005054	13014	Cstb	protein_coding	MGI Symbol	1	Cystatin-B [Source:UniProtKB/Swiss-Prot;Acc:Q62426]	-0.0379275	-0.269743	0.193888	0.74215	0.795896	-0.0186626	-0.213936	0.17661	0.847522	0.941946	0.240102	-0.0388388	0.519042	0.089456	0.1413	0.0429438	-0.139987	0.225875	0.637138	0.988678	-0.134793	-0.336345	0.0667592	0.183629	0.245299	-0.070751	-0.27631	0.134807	0.489943	0.872945	0.417839	0.126347	0.709331	0.00617026	0.0632464	0.262996	0.0214863	0.504506	0.0336362	0.106652	-0.296692	-0.602331	0.00894661
ENSMUSG00000005057	23921	Sh2b2	protein_coding	MGI Symbol	5	SH2B adaptor protein 2 [Source:MGI Symbol;Acc:MGI:1345171]	-1.6399	-1.98369	-1.29611	1.12228e-11	5.03329e-10	-0.282694	-0.652396	0.0870086	0.129825	0.419645	-1.80263	-2.20554	-1.39972	6.06708e-11	2.30872e-09	0.526394	0.189219	0.863569	0.00311055	0.497802	-0.681619	-0.994623	-0.368614	8.4893e-05	0.000275764	0.159504	-0.20145	0.520458	0.376407	0.806194	-0.594616	-0.977528	-0.211705	0.00325484	0.0434882	-0.419462	-0.7464	-0.0925245	0.0133257	0.05517	-0.119964	-0.499237	0.259309
ENSMUSG00000005069	19305	Pex5	protein_coding	MGI Symbol	8	Peroxisomal targeting signal 1 receptor [Source:UniProtKB/Swiss-Prot;Acc:O09012]	-0.0121483	-0.223128	0.198831	0.90776	0.929693	-0.0393109	-0.212162	0.13354	0.647655	0.852447	0.214136	-0.00713543	0.435407	0.0574576	0.0968841	-0.0296232	-0.192122	0.132876	0.713976	0.990955	-0.318138	-0.49934	-0.136937	0.00104564	0.00257005	-0.126148	-0.311716	0.0594198	0.176682	0.635325	0.502651	0.267302	0.738	0.000109673	0.00665571	0.437755	0.224971	0.65054	0.000176613	0.00264248	-0.265595	-0.517778	-0.0134128
ENSMUSG00000005078	104771	Jkamp	protein_coding	MGI Symbol	7	JNK1/MAPK8-associated membrane protein [Source:UniProtKB/Swiss-Prot;Acc:Q8BI36]	-0.199772	-0.370323	-0.0292214	0.0229295	0.0407813	0.0902732	-0.0545332	0.23508	0.214461	0.534205	-0.139041	-0.335433	0.0573512	0.159844	0.230399	-0.0373142	-0.172441	0.0978122	0.579205	0.983698	-0.207435	-0.356017	-0.0588517	0.00749963	0.0148382	-0.0971848	-0.249111	0.0547414	0.202979	0.670184	0.0310796	-0.174803	0.236962	0.761434	0.893131	0.0715847	-0.103743	0.246913	0.413413	0.589417	0.0295418	-0.186533	0.245617
ENSMUSG00000005087	12505	Cd44	protein_coding	MGI Symbol	9	CD44 molecule (Indian blood group) [Source:HGNC Symbol;Acc:HGNC:1681]	0.652749	0.16014	1.14536	0.01079	0.0211612	0.0070161	-0.387106	0.401138	0.971422	0.990536	0.827014	0.182125	1.4719	0.0133648	0.0275375	-0.0184266	-0.387538	0.350684	0.919983	0.998135	0.948744	0.490669	1.40682	0.000162399	0.000488891	0.103689	-0.317572	0.524949	0.620949	0.923736	-0.140157	-0.839779	0.559465	0.687165	0.85272	-0.384782	-0.941275	0.17171	0.169563	0.326906	-0.167248	-0.876623	0.542127
ENSMUSG00000005089	20511	Slc1a2	protein_coding	MGI Symbol	12	solute carrier family 1 (glial high affinity glutamate transporter), member 2 [Source:MGI Symbol;Acc:MGI:101931]	0.832786	0.472323	1.19325	3.74626e-05	0.000140615	0.0954884	-0.209496	0.400473	0.529759	0.787643	0.431695	0.045172	0.818218	0.029592	0.0546052	-0.0125912	-0.300776	0.275593	0.92994	0.998763	0.262973	-0.0525815	0.578527	0.0997225	0.14459	0.678308	0.357654	0.998962	0.000124168	0.0125915	0.156131	-0.251207	0.563469	0.442341	0.687072	0.138201	-0.230481	0.506883	0.452381	0.625207	0.496579	0.0649326	0.928225
ENSMUSG00000005102	27103	Eif2ak4	protein_coding	MGI Symbol	8	eIF-2-alpha kinase GCN2 [Source:UniProtKB/Swiss-Prot;Acc:Q9QZ05]	-0.409019	-0.586858	-0.231179	3.99559e-05	0.000148769	0.0552865	-0.101362	0.211935	0.479055	0.75761	-0.207191	-0.420391	0.00600875	0.0564676	0.0954255	0.0834336	-0.0611705	0.228038	0.249874	0.96466	-0.184788	-0.341071	-0.0285051	0.021755	0.0377465	-0.123048	-0.282773	0.036678	0.127068	0.567602	0.0610303	-0.160257	0.282318	0.579679	0.781932	-0.352964	-0.531069	-0.174858	0.000277994	0.00359951	-0.146541	-0.375763	0.0826807
ENSMUSG00000005103	22388	Wdr1	protein_coding	MGI Symbol	11	WD repeat domain 1 [Source:MGI Symbol;Acc:MGI:1337100]	-0.475703	-0.643513	-0.307892	1.38604e-06	7.88409e-06	0.0105886	-0.126636	0.147813	0.87662	0.954368	-0.33738	-0.51764	-0.157119	0.000533738	0.00164218	0.025175	-0.103954	0.154304	0.695111	0.989522	-0.353967	-0.497651	-0.210282	1.44113e-05	5.68355e-05	0.0402404	-0.106404	0.186885	0.581581	0.911316	0.041762	-0.149196	0.23272	0.660279	0.834554	0.0496741	-0.120608	0.219956	0.558091	0.711419	-0.127735	-0.332243	0.0767738
ENSMUSG00000005107	117591	Slc2a9	protein_coding	MGI Symbol	12	solute carrier family 2 (facilitated glucose transporter), member 9 [Source:MGI Symbol;Acc:MGI:2152844]	0.42635	0.203584	0.649115	0.000416114	0.00117429	0.111151	-0.0727477	0.29505	0.228464	0.55216	0.123359	-0.121213	0.36793	0.313451	0.401933	-0.150202	-0.323132	0.0227268	0.0866952	0.877681	-0.150663	-0.342683	0.0413576	0.120402	0.170538	0.0742023	-0.122278	0.270682	0.449029	0.853051	0.123819	-0.134605	0.382242	0.337972	0.599043	0.463999	0.235713	0.692284	0.000205018	0.00292268	0.414142	0.13915	0.689135
ENSMUSG00000005124	22402	Wisp1	protein_coding	MGI Symbol	6	WNT1 inducible signaling pathway protein 1 [Source:MGI Symbol;Acc:MGI:1197008]	0.211575	-0.246623	0.669774	0.355571	0.437875	0.463909	0.0949324	0.832886	0.0151343	0.137064	1.47232	0.805278	2.13935	7.08021e-05	0.000279911	-0.160359	-0.487652	0.166934	0.327309	0.97665	0.750222	0.340359	1.16009	0.000679056	0.00175091	-0.0213864	-0.395308	0.352536	0.908375	0.984892	0.561734	-0.149467	1.27294	0.118032	0.335643	-0.269808	-0.775275	0.235659	0.286481	0.463271	-0.796831	-1.51707	-0.0765934
ENSMUSG00000005125	17988	Ndrg1	protein_coding	MGI Symbol	13	Protein NDRG1 [Source:UniProtKB/Swiss-Prot;Acc:Q62433]	-0.499856	-0.874038	-0.125674	0.0102167	0.0201769	0.560091	0.241175	0.879007	0.00104254	0.0329429	0.407451	-0.0394183	0.854321	0.072691	0.118301	-0.250711	-0.539747	0.0383252	0.0871055	0.877681	0.0875078	-0.241124	0.416139	0.592776	0.658601	-0.304032	-0.62815	0.0200868	0.065166	0.428949	0.0692326	-0.404211	0.542677	0.768678	0.896527	0.464875	0.0528261	0.876924	0.0280772	0.0941056	-0.347216	-0.835066	0.140634
ENSMUSG00000005142	17159	Man2b1	protein_coding	MGI Symbol	6	Lysosomal alpha-mannosidase [Source:UniProtKB/Swiss-Prot;Acc:O09159]	0.0195549	-0.109186	0.148295	0.760002	0.811159	-0.0280328	-0.133696	0.0776302	0.594126	0.825496	-0.0568426	-0.193024	0.0793394	0.403164	0.493673	-0.0585286	-0.157812	0.0407543	0.239918	0.953764	-0.132474	-0.242438	-0.022509	0.019551	0.0342888	0.15605	0.0438176	0.268282	0.00772322	0.137615	0.0171024	-0.127052	0.161257	0.811372	0.916996	0.0321102	-0.0980915	0.162312	0.620271	0.763116	0.0483647	-0.106409	0.203139
ENSMUSG00000005150	67836	Wdr83	protein_coding	MGI Symbol	10	WD repeat domain containing 83 [Source:MGI Symbol;Acc:MGI:1915086]	-0.601515	-0.801738	-0.401292	4.74423e-07	3.10718e-06	0.10214	-0.0756979	0.279978	0.252006	0.578885	-0.52485	-0.754699	-0.295	4.42494e-05	0.000186338	-0.00479333	-0.169453	0.159867	0.953286	0.998763	-0.627928	-0.801136	-0.454719	9.73051e-09	9.98974e-08	-0.0640776	-0.248398	0.120243	0.485627	0.872777	0.0982844	-0.137764	0.334333	0.404313	0.654633	0.163775	-0.0360812	0.363631	0.105296	0.234914	0.0254746	-0.222101	0.27305
ENSMUSG00000005161	21672	Prdx2	protein_coding	MGI Symbol	8	Peroxiredoxin-2 [Source:UniProtKB/Swiss-Prot;Acc:Q61171]	0.216576	0.0179685	0.415183	0.0334059	0.0568229	-0.204624	-0.36879	-0.0404586	0.0159617	0.141112	0.198525	-0.0204998	0.417549	0.0743242	0.120536	0.0573393	-0.0969882	0.211667	0.456351	0.983698	0.019271	-0.152063	0.190605	0.820993	0.856432	-0.0224598	-0.1977	0.152781	0.796558	0.9642	0.236593	0.00527022	0.467916	0.0452538	0.20079	0.406663	0.203339	0.609987	0.000249151	0.00334228	-0.186573	-0.432472	0.0593257
ENSMUSG00000005198	20020	Polr2a	protein_coding	MGI Symbol	4	DNA-directed RNA polymerase II subunit RPB1 [Source:UniProtKB/Swiss-Prot;Acc:P08775]	-0.689547	-1.04626	-0.332831	0.000371524	0.00106606	-0.0808599	-0.36646	0.20474	0.569693	0.810024	-0.965895	-1.34774	-0.584049	9.52127e-06	4.81139e-05	0.0143751	-0.254103	0.282853	0.914201	0.998135	-0.459099	-0.760163	-0.158035	0.00378849	0.0080737	0.150113	-0.154086	0.454312	0.323897	0.772137	-0.492421	-0.897841	-0.0870004	0.0186392	0.121486	-0.425464	-0.790251	-0.0606771	0.0234791	0.0827022	0.195488	-0.242102	0.633078
ENSMUSG00000005204	80886	Senp3	protein_coding	MGI Symbol	9	Sentrin-specific protease 3 [Source:UniProtKB/Swiss-Prot;Acc:Q9EP97]	0.0919175	-0.0642631	0.248098	0.240686	0.313866	-0.135862	-0.266312	-0.00541109	0.0416588	0.238659	0.135711	-0.0454074	0.316829	0.137472	0.20288	0.00973213	-0.113263	0.132727	0.873506	0.997304	0.0704853	-0.0667226	0.207693	0.304711	0.377711	-0.00745071	-0.146617	0.131716	0.914208	0.986438	0.0749574	-0.116098	0.266012	0.431744	0.679396	0.268789	0.1036	0.433977	0.00216195	0.0151605	-0.179655	-0.380101	0.0207917
ENSMUSG00000005225	231999	Plekha8	protein_coding	MGI Symbol	2	Pleckstrin homology domain-containing family A member 8 [Source:UniProtKB/Swiss-Prot;Acc:Q80W71]	0.72991	0.520098	0.939722	2.40937e-08	2.41625e-07	-0.456165	-0.628869	-0.283461	4.70871e-06	0.00111185	0.242452	-0.00878584	0.493691	0.0581292	0.0978134	0.0300611	-0.134833	0.194955	0.713964	0.990955	0.15431	-0.0307726	0.339392	0.0995785	0.144398	-0.126157	-0.311146	0.0588317	0.175335	0.634536	0.118204	-0.146723	0.38313	0.371852	0.627419	0.0248696	-0.196373	0.246113	0.821098	0.896484	0.0312923	-0.246764	0.309348
ENSMUSG00000005233	66442	Spc25	protein_coding	MGI Symbol	9	Kinetochore protein Spc25 [Source:UniProtKB/Swiss-Prot;Acc:Q3UA16]	0.32161	-0.0453957	0.688616	0.084035	0.126888	-0.0644698	-0.369979	0.241039	0.67146	0.862864	0.205731	-0.259082	0.670543	0.375644	0.466172	0.047309	-0.239155	0.333773	0.739818	0.990955	-0.0995303	-0.40672	0.207659	0.515597	0.587178	-0.0181253	-0.337178	0.300928	0.908989	0.98494	0.35257	-0.125294	0.830434	0.143426	0.375084	0.346686	-0.0362039	0.729576	0.0746181	0.184116	0.0514098	-0.455944	0.558764
ENSMUSG00000005251	72388	Ripk4	protein_coding	MGI Symbol	2	Receptor-interacting serine/threonine-protein kinase 4 [Source:UniProtKB/Swiss-Prot;Acc:Q9ERK0]	0.000888285	-0.268976	0.270753	0.994715	0.996249	0.0730482	-0.158829	0.304925	0.527229	0.785852	0.222385	-0.121323	0.566093	0.197961	0.27576	-0.291274	-0.51365	-0.0688986	0.0116527	0.667388	-0.234908	-0.479231	0.00941575	0.0590196	0.0911834	-0.172743	-0.424905	0.07942	0.173445	0.63287	0.166019	-0.19228	0.524318	0.353928	0.612862	0.404951	0.102407	0.707495	0.0100814	0.045202	-0.148449	-0.518847	0.22195
ENSMUSG00000005262	22230	Ufd1	protein_coding	MGI Symbol	10	ubiquitin recognition factor in ER-associated degradation 1 [Source:MGI Symbol;Acc:MGI:109353]	0.0884208	-0.0504715	0.227313	0.205108	0.274047	-0.157535	-0.273184	-0.0418861	0.00893273	0.104419	-0.107628	-0.263267	0.0480121	0.169518	0.242512	0.0417639	-0.0671785	0.150706	0.442268	0.983698	0.0648702	-0.0563826	0.186123	0.285397	0.357214	0.0269681	-0.0964368	0.150373	0.660517	0.932685	-0.130734	-0.295226	0.0337578	0.115827	0.333165	0.0444842	-0.0994407	0.188409	0.53502	0.692492	0.0385135	-0.135096	0.212123
ENSMUSG00000005268	19116	Prlr	protein_coding	MGI Symbol	12	prolactin receptor [Source:MGI Symbol;Acc:MGI:97763]	0.308341	-0.207773	0.824456	0.233783	0.306186	0.0441971	-0.384086	0.47248	0.835533	0.93693	-0.541878	-1.10604	0.0222875	0.059263	0.0994635	-0.160126	-0.562514	0.242263	0.425251	0.983698	-0.363331	-0.811071	0.0844095	0.108613	0.156001	0.49941	0.0490255	0.949795	0.0307067	0.293904	-0.338673	-0.936031	0.258686	0.258054	0.518223	0.474096	-0.0517814	0.999974	0.075828	0.186405	0.894416	0.260989	1.52784
ENSMUSG00000005299	56384	Letm1	protein_coding	MGI Symbol	6	Mitochondrial proton/calcium exchanger protein [Source:UniProtKB/Swiss-Prot;Acc:Q9Z2I0]	-0.365845	-0.508576	-0.223115	7.70497e-06	3.51103e-05	0.12136	0.00529154	0.237428	0.0409031	0.236724	-0.318601	-0.4706	-0.166602	0.000139638	0.000504305	-0.053169	-0.162726	0.0563881	0.331859	0.978622	-0.253875	-0.375751	-0.131998	0.000151111	0.000458738	0.153941	0.0300015	0.27788	0.0163079	0.21011	-0.117896	-0.279001	0.0432098	0.146622	0.379665	0.0286379	-0.116062	0.173337	0.69074	0.813196	0.0741156	-0.099101	0.247332
ENSMUSG00000005312	56085	Ubqln1	protein_coding	MGI Symbol	4	ubiquilin 1 [Source:MGI Symbol;Acc:MGI:1860276]	0.339051	0.19991	0.478192	1.70393e-05	7.03416e-05	-0.0377518	-0.153242	0.077738	0.511892	0.775961	0.254589	0.107875	0.401303	0.00117538	0.00330331	-0.131704	-0.239958	-0.0234494	0.0184579	0.694149	0.154321	0.0358143	0.272827	0.0121068	0.0225454	-0.0684211	-0.191474	0.0546322	0.267181	0.735838	-0.0314356	-0.185869	0.122998	0.682418	0.849755	-0.133819	-0.273921	0.00628304	0.0606228	0.159665	0.0467104	-0.119263	0.212684
ENSMUSG00000005320	14186	Fgfr4	protein_coding	MGI Symbol	3	fibroblast growth factor receptor 4 [Source:HGNC Symbol;Acc:HGNC:3691]	-0.384306	-0.5791	-0.189511	0.000293148	0.000864468	0.0201212	-0.139558	0.1798	0.799903	0.920265	-0.566347	-0.776276	-0.356417	3.29604e-06	1.93079e-05	0.0225392	-0.12772	0.172798	0.762898	0.990955	-0.192906	-0.359809	-0.0260024	0.0246771	0.0421187	0.424598	0.253852	0.595343	1.24585e-05	0.00265243	-0.350902	-0.573049	-0.128755	0.00281216	0.0397838	0.167563	-0.0297408	0.364868	0.0936521	0.215955	0.202162	-0.0355729	0.439897
ENSMUSG00000005338	94332	Cadm3	protein_coding	MGI Symbol	5	Cell adhesion molecule 3 [Source:UniProtKB/Swiss-Prot;Acc:Q99N28]	-0.205154	-0.448788	0.038479	0.0963633	0.142829	0.415655	0.207828	0.623481	0.000249243	0.014709	-0.0609255	-0.33823	0.216379	0.658814	0.730184	-0.257093	-0.446706	-0.0674793	0.00922586	0.633949	-0.178907	-0.3895	0.0316854	0.093549	0.136631	0.179958	-0.0441708	0.404086	0.11226	0.54191	-0.13911	-0.431161	0.15294	0.340777	0.600579	-0.0554198	-0.300268	0.189429	0.649216	0.784313	0.271426	-0.0336366	0.576488
ENSMUSG00000005354	56551	Txn2	protein_coding	MGI Symbol	7	thioredoxin 2 [Source:MGI Symbol;Acc:MGI:1929468]	-0.34065	-0.509457	-0.171844	0.000223758	0.000681186	-0.10493	-0.241605	0.031746	0.128336	0.416988	-0.66513	-0.845262	-0.484999	6.4347e-09	9.80838e-08	-0.0408663	-0.16903	0.0872976	0.522248	0.983698	-0.60008	-0.744242	-0.455918	3.7601e-10	6.41687e-09	-0.0273639	-0.173217	0.118489	0.706035	0.945719	-0.105917	-0.297761	0.0859267	0.270519	0.530865	0.0736046	-0.0988085	0.246018	0.392641	0.569983	0.219551	0.0139718	0.42513
ENSMUSG00000005362	58799	Crbn	protein_coding	MGI Symbol	5	Protein cereblon [Source:UniProtKB/Swiss-Prot;Acc:Q8C7D2]	0.760244	0.590967	0.929522	5.49699e-11	1.70578e-09	0.0659224	-0.0700561	0.201901	0.332359	0.653043	0.754417	0.551891	0.956943	5.26939e-09	8.31514e-08	-0.036029	-0.163515	0.0914569	0.570388	0.983698	0.538826	0.392309	0.685343	7.05218e-09	7.60686e-08	0.0415777	-0.103169	0.186324	0.564114	0.904798	0.179562	-0.035453	0.394577	0.0990401	0.308449	-0.0241927	-0.20105	0.152665	0.78321	0.871822	0.0717499	-0.154483	0.297983
ENSMUSG00000005370	17688	Msh6	protein_coding	MGI Symbol	1	DNA mismatch repair protein Msh6 [Source:UniProtKB/Swiss-Prot;Acc:P54276]	0.173297	-0.016618	0.363212	0.0724787	0.111831	-0.131255	-0.291884	0.029374	0.106256	0.381517	0.284208	0.0440724	0.524343	0.0216374	0.0416797	0.106922	-0.0439598	0.257803	0.15946	0.934297	0.394251	0.221722	0.566781	4.3793e-05	0.000153796	0.02085	-0.148167	0.189867	0.804022	0.965552	-0.00312168	-0.257417	0.251174	0.980291	0.991617	-0.252207	-0.457421	-0.0469929	0.0173817	0.0667012	-0.242166	-0.502802	0.0184704
ENSMUSG00000005371	225055	Fbxo11	protein_coding	MGI Symbol	4	Mus musculus F-box protein 11 (Fbxo11), transcript variant 2, mRNA. [Source:RefSeq mRNA;Acc:NM_001348248]	0.197728	0.040319	0.355137	0.0152197	0.0285254	-0.123199	-0.253838	0.00743955	0.0638034	0.300114	-0.0850716	-0.26024	0.090097	0.331518	0.420903	-0.003724	-0.126751	0.119303	0.951428	0.998763	0.0687401	-0.0682911	0.205771	0.316058	0.389435	0.0193798	-0.120133	0.158892	0.779941	0.960646	-0.157536	-0.342808	0.0277371	0.0932712	0.298059	-0.162835	-0.324613	-0.00105682	0.0485966	0.136957	0.1596	-0.0363464	0.355547
ENSMUSG00000005373	58805	Mlxipl	protein_coding	MGI Symbol	10	Carbohydrate-responsive element-binding protein [Source:UniProtKB/Swiss-Prot;Acc:Q99MZ3]	-0.96516	-1.28315	-0.647174	3.89996e-07	2.63933e-06	-0.249499	-0.499562	0.000564333	0.050493	0.264111	-1.01565	-1.34914	-0.682159	3.65455e-07	2.88696e-06	0.0294159	-0.204342	0.263174	0.800169	0.992101	-0.592908	-0.856696	-0.329119	5.52013e-05	0.000188757	-0.540215	-0.811943	-0.268486	0.000267715	0.0200723	-0.393324	-0.748509	-0.0381389	0.0309159	0.161922	-0.554146	-0.876969	-0.231323	0.00130757	0.0106333	-0.199011	-0.586049	0.188027
ENSMUSG00000005374	27368	Tbl2	protein_coding	MGI Symbol	5	Transducin beta-like protein 2 [Source:UniProtKB/Swiss-Prot;Acc:Q9R099]	-0.148631	-0.345761	0.0484999	0.135106	0.191615	-0.265328	-0.434313	-0.0963426	0.00296212	0.0589113	-0.505544	-0.731306	-0.279782	5.81298e-05	0.000235035	0.0781542	-0.0822141	0.238522	0.329863	0.97665	-0.417397	-0.590558	-0.244235	2.00844e-05	7.66038e-05	0.01544	-0.164931	0.195811	0.863257	0.978104	-0.00999319	-0.245015	0.225028	0.931813	0.971771	0.0134277	-0.18847	0.215325	0.893542	0.940285	0.0915857	-0.155948	0.339119
ENSMUSG00000005378	66138	Bud23	protein_coding	MGI Symbol	15	Probable 18S rRNA (guanine-N(7))-methyltransferase [Source:UniProtKB/Swiss-Prot;Acc:Q9CY21]	-0.196711	-0.345178	-0.0482433	0.0107979	0.0211735	0.0729695	-0.052345	0.198284	0.245619	0.572326	-0.116867	-0.286662	0.0529271	0.171469	0.244791	-0.00648799	-0.123576	0.1106	0.91122	0.998135	0.0122241	-0.11818	0.142628	0.850409	0.880371	-0.0502563	-0.182349	0.0818367	0.445696	0.851907	-0.135579	-0.314816	0.0436574	0.133877	0.360045	-0.22102	-0.373969	-0.06807	0.00580471	0.0304133	-0.00687395	-0.194408	0.18066
ENSMUSG00000005397	18073	Nid1	protein_coding	MGI Symbol	3	Nidogen-1 [Source:UniProtKB/Swiss-Prot;Acc:P10493]	0.208926	-0.202351	0.620202	0.310051	0.389385	0.0886311	-0.252012	0.429274	0.601233	0.829603	0.679228	0.169141	1.18931	0.0104403	0.0221829	0.11219	-0.204733	0.429112	0.477741	0.983698	0.318445	-0.0390148	0.675905	0.079215	0.118317	-0.0215497	-0.378402	0.335303	0.903285	0.984471	0.472973	-0.0632424	1.00919	0.0821012	0.27905	-0.556976	-0.974704	-0.139249	0.0103478	0.0461457	-0.381671	-0.941403	0.17806
ENSMUSG00000005410	17218	Mcm5	protein_coding	MGI Symbol	5	minichromosome maintenance complex component 5 [Source:MGI Symbol;Acc:MGI:103197]	-0.694239	-1.20823	-0.180252	0.00947359	0.0189341	0.236909	-0.242592	0.71641	0.323312	0.644986	-0.376452	-0.997104	0.2442	0.226862	0.307948	-0.171094	-0.612112	0.269924	0.436862	0.983698	-0.75783	-1.20538	-0.310284	0.00149191	0.00353309	-0.234445	-0.722916	0.254026	0.337152	0.7818	0.210285	-0.415024	0.835593	0.499897	0.728883	-0.150325	-0.62705	0.3264	0.52684	0.686403	-0.0808787	-0.728545	0.566787
ENSMUSG00000005413	15368	Hmox1	protein_coding	MGI Symbol	2	Heme oxygenase 1 [Source:UniProtKB/Swiss-Prot;Acc:P14901]	-0.108353	-0.618178	0.401472	0.66926	0.733103	0.0892402	-0.333846	0.512326	0.671602	0.862888	0.0760234	-0.491556	0.643602	0.787611	0.837663	0.062479	-0.334347	0.459305	0.751524	0.990955	-0.205287	-0.644841	0.234266	0.35016	0.424091	-0.036486	-0.486099	0.413127	0.870301	0.978131	0.34379	-0.254443	0.942022	0.251737	0.511228	0.287443	-0.23359	0.808475	0.270879	0.446449	-0.0951364	-0.730011	0.539738
ENSMUSG00000005417	26936	Mprip	protein_coding	MGI Symbol	9	Myosin phosphatase Rho-interacting protein [Source:UniProtKB/Swiss-Prot;Acc:P97434]	-0.110048	-0.238641	0.0185437	0.0912494	0.136339	-0.049025	-0.154039	0.0559892	0.350358	0.668436	-0.111079	-0.247015	0.0248579	0.106254	0.163266	0.0207646	-0.0780719	0.119601	0.672825	0.988678	-0.23816	-0.348239	-0.12808	9.2571e-05	0.000297874	-0.0722564	-0.185045	0.0405317	0.20232	0.669587	0.147846	0.00352805	0.292163	0.0449232	0.200143	0.113002	-0.0173197	0.243324	0.0872116	0.205407	-0.0479949	-0.202871	0.106882
ENSMUSG00000005442	71722	Cic	protein_coding	MGI Symbol	15	capicua transcriptional repressor [Source:HGNC Symbol;Acc:HGNC:14214]	-0.867276	-1.11632	-0.618235	2.35626e-08	2.36848e-07	-0.0377543	-0.237161	0.161653	0.703472	0.879902	-0.989701	-1.25545	-0.72395	5.29765e-09	8.32937e-08	0.047171	-0.140586	0.234928	0.613764	0.98603	-0.495966	-0.706248	-0.285685	2.77558e-05	0.000102288	-0.0150971	-0.22877	0.198576	0.886948	0.981744	-0.446564	-0.72868	-0.164448	0.00276143	0.0395399	-0.386112	-0.639957	-0.132266	0.00386861	0.0231209	0.0846711	-0.220094	0.389437
ENSMUSG00000005447	18476	Pafah1b3	protein_coding	MGI Symbol	7	Platelet-activating factor acetylhydrolase IB subunit gamma [Source:UniProtKB/Swiss-Prot;Acc:Q61205]	-1.29539	-1.67518	-0.915609	3.68006e-08	3.45325e-07	-0.115266	-0.508036	0.277503	0.555736	0.802374	-1.01796	-1.4918	-0.54412	0.00010159	0.00038078	0.170372	-0.194523	0.535267	0.350291	0.979365	-0.59166	-0.949981	-0.233339	0.00189058	0.00434259	-0.421776	-0.798125	-0.045428	0.0290709	0.284723	-0.255931	-0.72473	0.212868	0.275823	0.537401	0.314439	-0.10601	0.734887	0.138201	0.282827	-0.392696	-0.855832	0.0704393
ENSMUSG00000005465	50931	Il27ra	protein_coding	MGI Symbol	3	Interleukin-27 receptor subunit alpha [Source:UniProtKB/Swiss-Prot;Acc:O70394]	0.0799113	-0.369292	0.529114	0.720579	0.778613	-0.0178639	-0.408925	0.373197	0.92676	0.974443	-0.03514	-0.593356	0.523076	0.899203	0.925235	0.294447	-0.0579701	0.646864	0.0988871	0.901565	0.0715973	-0.301985	0.44518	0.700024	0.75327	0.149715	-0.239534	0.538965	0.440772	0.848212	0.18771	-0.384104	0.759523	0.510114	0.735282	0.419117	-0.0618693	0.900103	0.0857263	0.203236	0.0971874	-0.503195	0.69757
ENSMUSG00000005469	18747	Prkaca	protein_coding	MGI Symbol	2	protein kinase, cAMP dependent, catalytic, alpha [Source:MGI Symbol;Acc:MGI:97592]	-0.0730932	-0.213658	0.0674713	0.298916	0.377519	0.18516	0.0692926	0.301027	0.00254066	0.0543585	0.0161854	-0.135724	0.168095	0.830277	0.871761	-0.109869	-0.219018	-0.000719873	0.0485833	0.82041	-0.237177	-0.358427	-0.115928	0.000323953	0.000905549	0.037505	-0.0863281	0.161338	0.543217	0.896025	0.143494	-0.0173307	0.304318	0.0787694	0.272213	-0.199168	-0.343514	-0.0548221	0.00815913	0.0391045	0.0958813	-0.0756112	0.267374
ENSMUSG00000005470	66929	Asf1b	protein_coding	MGI Symbol	3	Histone chaperone ASF1B [Source:UniProtKB/Swiss-Prot;Acc:Q9DAP7]	-0.897	-1.63871	-0.155291	0.0191154	0.0347496	-0.214215	-0.94881	0.520381	0.558236	0.803304	-1.61867	-2.44436	-0.792973	0.000315831	0.00103396	0.0752162	-0.624233	0.774665	0.828725	0.992854	-1.08529	-1.75578	-0.414805	0.00226648	0.00512354	-0.247437	-1.00466	0.509791	0.512042	0.885318	-0.45816	-1.25947	0.343146	0.254102	0.513703	0.301611	-0.435128	1.03835	0.412172	0.588357	0.507451	-0.324577	1.33948
ENSMUSG00000005481	68278	Ddx39	protein_coding	MGI Symbol	7	ATP-dependent RNA helicase DDX39A [Source:UniProtKB/Swiss-Prot;Acc:Q8VDW0]	-0.632082	-0.830656	-0.433507	1.53456e-07	1.18141e-06	0.0447251	-0.134752	0.224202	0.616633	0.837576	-0.165773	-0.412576	0.0810306	0.181778	0.257022	0.0159159	-0.150868	0.1827	0.847748	0.994382	-0.2429	-0.421861	-0.0639384	0.00916019	0.017695	0.0253974	-0.162672	0.213467	0.785912	0.960898	0.0930431	-0.162148	0.348234	0.464745	0.704846	0.322144	0.105043	0.539245	0.00472438	0.0263895	-0.421584	-0.682604	-0.160564
ENSMUSG00000005483	81489	Dnajb1	protein_coding	MGI Symbol	2	DnaJ homolog subfamily B member 1 [Source:UniProtKB/Swiss-Prot;Acc:Q9QYJ3]	0.376303	0.0994726	0.653133	0.00906445	0.0181891	-0.620542	-0.853542	-0.387542	4.09921e-06	0.000985859	-0.470336	-0.784459	-0.156214	0.00439605	0.0104467	-0.0966388	-0.32147	0.128193	0.389446	0.983698	-0.285192	-0.532609	-0.0377749	0.0250416	0.042696	0.100168	-0.156996	0.357331	0.43504	0.844603	-0.281783	-0.612447	0.0488808	0.0925753	0.296931	0.378628	0.0816853	0.675571	0.0138601	0.0567604	0.226097	-0.121781	0.573975
ENSMUSG00000005501	227334	Usp40	protein_coding	MGI Symbol	9	ubiquitin specific peptidase 40 [Source:MGI Symbol;Acc:MGI:2443184]	0.429963	0.281512	0.578414	9.38796e-07	5.60179e-06	0.0466611	-0.0758519	0.169174	0.445216	0.738727	0.331368	0.165852	0.496885	0.000246255	0.00083458	-0.109279	-0.224491	0.00593269	0.0623526	0.832028	0.113545	-0.0148303	0.241919	0.0812989	0.120915	-0.0545762	-0.185344	0.0761916	0.40322	0.824016	0.108544	-0.0663899	0.283479	0.21657	0.470885	0.13821	-0.0142405	0.29066	0.0742675	0.183542	0.145256	-0.0402815	0.330793
ENSMUSG00000005505	67136	Kbtbd4	protein_coding	MGI Symbol	5	Kelch repeat and BTB domain-containing protein 4 [Source:UniProtKB/Swiss-Prot;Acc:Q8R179]	0.469071	0.25862	0.679522	6.19758e-05	0.000218836	-0.0479756	-0.219619	0.123668	0.574611	0.812906	0.456836	0.184264	0.729409	0.00164471	0.00443518	-0.0512263	-0.213556	0.111103	0.526526	0.983698	0.389068	0.199848	0.578289	0.000177802	0.000529493	0.131601	-0.0554839	0.318686	0.162472	0.616246	0.0165418	-0.272853	0.305937	0.908431	0.963497	0.308607	0.0624319	0.554783	0.0154106	0.0611856	-0.0357409	-0.334277	0.262795
ENSMUSG00000005506	13046	Celf1	protein_coding	MGI Symbol	14	CUGBP Elav-like family member 1 [Source:UniProtKB/Swiss-Prot;Acc:P28659]	0.324363	0.195968	0.452758	9.71788e-06	4.3015e-05	-0.0973788	-0.203675	0.00891745	0.071404	0.315631	0.251004	0.115572	0.386435	0.000593967	0.00180188	0.00161168	-0.0982183	0.101442	0.974082	0.998763	0.326688	0.217392	0.435984	5.22272e-07	3.09432e-06	-0.0582793	-0.172132	0.0555737	0.306412	0.760875	-0.0740731	-0.216625	0.0684792	0.299262	0.561181	-0.086641	-0.215092	0.04181	0.17999	0.340848	-0.0240192	-0.177408	0.129369
ENSMUSG00000005510	68349	Ndufs3	protein_coding	MGI Symbol	6	NADH dehydrogenase [ubiquinone] iron-sulfur protein 3, mitochondrial [Source:UniProtKB/Swiss-Prot;Acc:Q9DCT2]	-0.10142	-0.318273	0.115433	0.349492	0.431409	-0.0606807	-0.240052	0.118691	0.497358	0.767802	0.020132	-0.219083	0.259347	0.865539	0.89962	0.00469453	-0.163999	0.173388	0.955341	0.998763	-0.354309	-0.541387	-0.16723	0.000468224	0.00125978	-0.0182962	-0.209685	0.173093	0.847483	0.973826	0.379135	0.126618	0.631653	0.00429995	0.0510663	0.424588	0.203024	0.646153	0.00041019	0.00471428	-0.182233	-0.450701	0.086235
ENSMUSG00000005514	18984	Por	protein_coding	MGI Symbol	9	P450 (cytochrome) oxidoreductase [Source:MGI Symbol;Acc:MGI:97744]	-0.442698	-0.929389	0.0439935	0.0733493	0.112906	0.158014	-0.236629	0.552658	0.42242	0.722598	-0.73683	-1.26324	-0.210415	0.00735973	0.0164369	0.239421	-0.137182	0.616025	0.205718	0.950593	-0.665263	-1.09341	-0.237113	0.00323842	0.00703065	0.306157	-0.12082	0.733134	0.154708	0.606908	0.167854	-0.396587	0.732296	0.550509	0.763405	-0.0498076	-0.565309	0.465693	0.845872	0.911949	0.452146	-0.146383	1.05068
ENSMUSG00000005533	16001	Igf1r	protein_coding	MGI Symbol	6	insulin like growth factor 1 receptor [Source:HGNC Symbol;Acc:HGNC:5465]	0.0180525	-0.400016	0.436121	0.930757	0.947761	0.0895852	-0.270375	0.449545	0.617086	0.837634	0.185998	-0.349391	0.721387	0.485921	0.573488	0.0355037	-0.294143	0.365151	0.828465	0.992854	-0.0760817	-0.432384	0.280221	0.667799	0.725385	0.0700549	-0.302665	0.442775	0.705523	0.945719	0.297583	-0.254617	0.849784	0.28195	0.543519	0.181365	-0.252302	0.615032	0.40226	0.578917	-0.0783602	-0.654426	0.497705
ENSMUSG00000005534	16337	Insr	protein_coding	MGI Symbol	5	Insulin receptor Insulin receptor subunit alpha Insulin receptor subunit beta [Source:UniProtKB/Swiss-Prot;Acc:P15208]	0.646647	0.469684	0.823611	8.14535e-09	9.76765e-08	0.000704849	-0.147759	0.149169	0.992377	0.997406	0.712009	0.526199	0.897818	2.74321e-09	4.98744e-08	-0.0313958	-0.171146	0.108354	0.65165	0.988678	0.358083	0.205661	0.510505	2.94075e-05	0.000107582	-0.038517	-0.197643	0.120609	0.626736	0.924171	0.32253	0.127011	0.518048	0.00190745	0.0323818	0.0357834	-0.14247	0.214037	0.686558	0.810356	-0.0646564	-0.27394	0.144627
ENSMUSG00000005547	13087	Cyp2a5	protein_coding	MGI Symbol	5		0.610016	0.0169936	1.20304	0.0440962	0.0723444	0.154463	-0.344451	0.653378	0.534337	0.789918	0.0987227	-0.542888	0.740333	0.756987	0.812594	0.0362552	-0.436572	0.509082	0.877388	0.99766	-0.539524	-1.07167	-0.00737693	0.0470629	0.0745191	0.485709	-0.0445018	1.01592	0.0714158	0.445046	0.674502	-0.0119958	1.361	0.0539291	0.221358	0.455073	-0.172317	1.08246	0.150114	0.300528	0.665756	-0.051477	1.38299
ENSMUSG00000005553	11944	Atp4a	protein_coding	MGI Symbol	5	ATPase H+/K+ transporting alpha subunit [Source:HGNC Symbol;Acc:HGNC:819]	-1.91378	-2.50358	-1.32399	1.04085e-07	8.49095e-07	0.578748	-0.0208519	1.17835	0.0580812	0.284013	0.165469	-0.654313	0.985252	0.684935	0.752559	-0.336618	-0.871873	0.198637	0.210537	0.950593	0.364176	-0.281887	1.01024	0.260759	0.330549	-0.217886	-0.823059	0.387288	0.470313	0.865305	-0.535324	-1.4314	0.360746	0.233794	0.491309	-1.0079	-1.70387	-0.311924	0.00570945	0.0300319	-1.5005	-2.31314	-0.687864
ENSMUSG00000005566	21849	Trim28	protein_coding	MGI Symbol	10	tripartite motif-containing 28 [Source:MGI Symbol;Acc:MGI:109274]	-0.339632	-0.497742	-0.181522	0.000101742	0.000340021	-0.141156	-0.27033	-0.011982	0.033059	0.209331	-0.631475	-0.801235	-0.461715	5.44123e-09	8.50364e-08	0.036429	-0.0849914	0.157849	0.54699	0.983698	-0.428655	-0.563958	-0.293351	1.68653e-07	1.1694e-06	0.0642544	-0.073634	0.202143	0.351229	0.789296	-0.166391	-0.346343	0.0135604	0.0689164	0.251902	0.179381	0.0191718	0.33959	0.0292112	0.0965308	0.150687	-0.0420082	0.343383
ENSMUSG00000005575	22192	Ube2m	protein_coding	MGI Symbol	8	ubiquitin-conjugating enzyme E2M [Source:MGI Symbol;Acc:MGI:108278]	-0.789438	-0.962015	-0.61686	3.40614e-11	1.17336e-09	-0.181225	-0.320724	-0.0417253	0.0122967	0.120617	-1.0185	-1.20284	-0.834165	1.87304e-13	3.98774e-11	0.0584479	-0.0726903	0.189586	0.37236	0.983698	-0.732231	-0.878896	-0.585567	3.25533e-12	1.25824e-10	-0.0407414	-0.18971	0.108227	0.582839	0.912326	-0.227825	-0.423514	-0.0321359	0.0237153	0.139253	-0.178732	-0.354426	-0.00303856	0.0463595	0.132671	0.0478417	-0.162643	0.258327
ENSMUSG00000005580	11515	Adcy9	protein_coding	MGI Symbol	3	Adenylate cyclase type 9 [Source:UniProtKB/Swiss-Prot;Acc:P51830]	0.012129	-0.212102	0.23636	0.913325	0.933965	0.00950451	-0.176326	0.195335	0.918027	0.971487	0.0888769	-0.160447	0.338201	0.474691	0.562996	-0.0602147	-0.234979	0.11455	0.489494	0.983698	-0.13829	-0.332267	0.0556865	0.157024	0.214209	0.065575	-0.132969	0.264119	0.507545	0.883842	0.166953	-0.0961955	0.4301	0.206623	0.460182	0.111542	-0.117994	0.341079	0.331233	0.509803	-0.0672434	-0.346365	0.211878
ENSMUSG00000005583	17260	Mef2c	protein_coding	MGI Symbol	31	Mus musculus myocyte enhancer factor 2C (Mef2c), transcript variant 14, mRNA. [Source:RefSeq mRNA;Acc:NM_001347577]	1.09267	0.649026	1.53631	1.44619e-05	6.12377e-05	0.00635093	-0.318858	0.33156	0.968652	0.989218	1.08528	0.491867	1.67869	0.000685174	0.00204419	-0.0927856	-0.400093	0.214522	0.544458	0.983698	0.584518	0.212039	0.956997	0.0029761	0.00652772	-0.117145	-0.460545	0.226256	0.493784	0.874747	0.407975	-0.22166	1.03761	0.197326	0.447636	-0.182097	-0.63779	0.273597	0.423333	0.599479	0.0137419	-0.651988	0.679472
ENSMUSG00000005609	22083	Ctr9	protein_coding	MGI Symbol	9	RNA polymerase-associated [Source:UniProtKB/Swiss-Prot;Acc:Q62018]	0.10301	-0.0631694	0.26919	0.217016	0.287796	0.00324654	-0.134669	0.141162	0.962217	0.986915	0.106401	-0.0802734	0.293075	0.255562	0.339885	-0.0657517	-0.19548	0.0639765	0.311133	0.975777	0.272875	0.127083	0.418667	0.000533583	0.00141277	-0.0527118	-0.199777	0.0943531	0.47229	0.865965	-0.232226	-0.430401	-0.0340511	0.0228765	0.13713	-0.326287	-0.498181	-0.154393	0.000456544	0.00508194	-0.000144038	-0.208572	0.208284
ENSMUSG00000005610	13690	Eif4g2	protein_coding	MGI Symbol	14	eukaryotic translation initiation factor 4 gamma 2 isoform 2 [Source:RefSeq peptide;Acc:NP_001035221]	0.631307	0.464332	0.798283	3.74572e-09	5.05418e-08	-0.105513	-0.245329	0.0343018	0.134758	0.426751	0.471544	0.296268	0.64682	3.45599e-06	2.01269e-05	-0.0314565	-0.162575	0.0996624	0.629786	0.988213	0.338752	0.195744	0.48176	2.60504e-05	9.66344e-05	0.0719877	-0.0767449	0.22072	0.33314	0.779221	0.101336	-0.0830027	0.285674	0.27255	0.533475	-0.0255389	-0.193078	0.142	0.759174	0.85666	0.05425	-0.143372	0.251872
ENSMUSG00000005611	17540	Mrvi1	protein_coding	MGI Symbol	7	Protein MRVI1 [Source:UniProtKB/Swiss-Prot;Acc:Q9WUX5]	-0.0736525	-0.396196	0.24889	0.646326	0.712489	0.00270569	-0.282755	0.288167	0.984782	0.995093	0.104702	-0.318105	0.527509	0.618835	0.69625	0.0152366	-0.250357	0.28083	0.908098	0.998135	-0.21513	-0.498034	0.0677738	0.131889	0.184257	0.0540456	-0.245972	0.354063	0.717208	0.945858	0.335069	-0.0988208	0.768958	0.126174	0.348643	-0.176852	-0.49702	0.143315	0.270285	0.445852	-0.175649	-0.624326	0.273029
ENSMUSG00000005615	13026	Pcyt1a	protein_coding	MGI Symbol	7	Choline-phosphate cytidylyltransferase A [Source:UniProtKB/Swiss-Prot;Acc:P49586]	0.377648	0.186235	0.569061	0.000293016	0.000864378	-0.0908927	-0.249446	0.0676611	0.252885	0.579919	0.363532	0.158967	0.568097	0.000924734	0.00267413	0.0392412	-0.109871	0.188353	0.597091	0.984262	0.147571	-0.0171279	0.31227	0.077566	0.116174	0.0935903	-0.0757307	0.262911	0.269974	0.74032	0.255202	0.0390119	0.471392	0.0219573	0.134573	-0.0164691	-0.210592	0.177654	0.864464	0.923331	-0.0767764	-0.307745	0.154192
ENSMUSG00000005621	233410	Zfp592	protein_coding	MGI Symbol	4	zinc finger protein 592 [Source:MGI Symbol;Acc:MGI:2443541]	-0.144435	-0.31633	0.0274594	0.0970536	0.143725	-0.0508969	-0.192423	0.0906294	0.470815	0.75224	-0.305696	-0.49165	-0.119741	0.00196904	0.00517651	0.0253837	-0.107746	0.158514	0.701484	0.990395	0.0612543	-0.0865168	0.209025	0.406387	0.48059	0.102415	-0.0487175	0.253547	0.178018	0.637587	-0.341566	-0.538268	-0.144864	0.00116741	0.0241804	-0.0848069	-0.25953	0.0899165	0.33179	0.510377	0.110363	-0.09963	0.320357
ENSMUSG00000005625	19185	Psmd4	protein_coding	MGI Symbol	8	26S proteasome non-ATPase regulatory subunit 4 [Source:UniProtKB/Swiss-Prot;Acc:O35226]	-0.64298	-0.827306	-0.458654	2.27258e-08	2.29324e-07	-0.0235213	-0.171496	0.124453	0.749228	0.899447	-0.741363	-0.937374	-0.545352	3.71345e-09	6.27133e-08	0.0121732	-0.127156	0.151502	0.860462	0.996358	-0.719261	-0.8767	-0.561822	3.52284e-11	9.07759e-10	0.0729366	-0.0852934	0.231166	0.356397	0.792557	-0.00992864	-0.219201	0.199343	0.923942	0.96928	0.0345616	-0.154417	0.22354	0.713096	0.827612	0.0748616	-0.149861	0.299584
ENSMUSG00000005656	72183	Snx6	protein_coding	MGI Symbol	8	Sorting nexin-6 Sorting nexin-6, N-terminally processed [Source:UniProtKB/Swiss-Prot;Acc:Q6P8X1]	0.900204	0.671024	1.12938	1.53262e-09	2.45427e-08	-0.130936	-0.310203	0.0483311	0.147372	0.447416	0.9358	0.630484	1.24112	3.23099e-07	2.59659e-06	0.072957	-0.0959065	0.24182	0.387026	0.983698	0.713767	0.513309	0.914225	1.45039e-08	1.41201e-07	-0.0585536	-0.246582	0.129475	0.531964	0.892334	0.29499	-0.0288716	0.618851	0.0729732	0.261284	0.106421	-0.148951	0.361793	0.403916	0.580411	-0.166532	-0.503585	0.17052
ENSMUSG00000005667	17768	Mthfd2	protein_coding	MGI Symbol	7	Bifunctional methylenetetrahydrofolate dehydrogenase/cyclohydrolase, mitochondrial NAD-dependent methylenetetrahydrofolate dehydrogenase Methenyltetrahydrofolate cyclohydrolase [Source:UniProtKB/Swiss-Prot;Acc:P18155]	-1.7736	-2.388	-1.15921	9.97482e-07	5.90173e-06	0.560501	-0.0584889	1.17949	0.0745986	0.324343	0.234699	-0.627689	1.09709	0.58468	0.665128	-0.053625	-0.584223	0.476973	0.83888	0.994117	0.814884	0.157493	1.47228	0.0165079	0.0295912	0.496095	-0.15701	1.1492	0.132304	0.576995	-0.63381	-1.57951	0.311887	0.182717	0.431365	-0.665724	-1.44048	0.109036	0.0899937	0.21032	-1.4478	-2.3069	-0.588704
ENSMUSG00000005672	16590	Kit	protein_coding	MGI Symbol	8	Mast/stem cell growth factor receptor Kit [Source:UniProtKB/Swiss-Prot;Acc:P05532]	0.362345	0.0237121	0.700978	0.0366555	0.0615921	0.325106	0.0529744	0.597238	0.0205158	0.160666	1.01036	0.558774	1.46194	5.88199e-05	0.000237455	-0.154094	-0.402971	0.0947838	0.217538	0.950593	0.931996	0.616046	1.24795	6.69243e-07	3.8526e-06	-0.133446	-0.413399	0.146507	0.340426	0.783328	-0.0757333	-0.567476	0.41601	0.756768	0.890392	0.00579676	-0.399366	0.410959	0.977031	0.98714	-0.322904	-0.817418	0.171609
ENSMUSG00000005674	641376	Tomm40l	protein_coding	MGI Symbol	8	Mitochondrial import receptor subunit TOM40B [Source:UniProtKB/Swiss-Prot;Acc:Q9CZR3]	0.249061	-0.068061	0.566182	0.120054	0.172934	-0.202987	-0.474577	0.0686021	0.138437	0.434194	-0.14705	-0.536807	0.242707	0.449472	0.5391	0.0277451	-0.232074	0.287564	0.8299	0.992854	-0.314337	-0.587229	-0.0414448	0.0251365	0.042824	-0.100752	-0.387795	0.18629	0.48145	0.870298	0.195031	-0.20356	0.593623	0.327946	0.589362	0.466007	0.127744	0.804269	0.00825008	0.0394201	0.193123	-0.229625	0.615872
ENSMUSG00000005677	12355	Nr1i3	protein_coding	MGI Symbol	8	Nuclear receptor subfamily 1 group I member 3 [Source:UniProtKB/Swiss-Prot;Acc:O35627]	1.01345	0.380865	1.64603	0.00248453	0.00576601	0.212867	-0.321775	0.747508	0.425008	0.723978	-0.466607	-1.17269	0.239471	0.188758	0.26516	-0.230538	-0.734372	0.273295	0.359899	0.983698	-0.790595	-1.3581	-0.223092	0.00761629	0.0150461	0.797088	0.237593	1.35658	0.00646163	0.125063	0.0934496	-0.659384	0.846283	0.802824	0.913704	1.06438	0.40307	1.7257	0.00238463	0.0162983	1.69292	0.910064	2.47578
ENSMUSG00000005681	11807	Apoa2	protein_coding	MGI Symbol	4	Apolipoprotein A-II Proapolipoprotein A-II [Source:UniProtKB/Swiss-Prot;Acc:P09813]	-0.171855	-0.471832	0.128122	0.253183	0.327318	-0.108516	-0.3529	0.135868	0.374121	0.684807	-0.568597	-0.889329	-0.247866	0.000947821	0.0027348	0.0742849	-0.155656	0.304225	0.516811	0.983698	-0.58442	-0.843369	-0.325472	5.2143e-05	0.000179576	0.143821	-0.117158	0.4048	0.271389	0.741273	0.0901077	-0.252018	0.432234	0.5968	0.792965	0.436484	0.130577	0.742391	0.00638775	0.0326092	0.288226	-0.0766459	0.653098
ENSMUSG00000005682	103135	Pan2	protein_coding	MGI Symbol	7	PAN2-PAN3 deadenylation complex catalytic subunit Pan2 [Source:UniProtKB/Swiss-Prot;Acc:Q8BGF7]	-0.21268	-0.354096	-0.0712644	0.00424227	0.00927045	-0.0661509	-0.18383	0.0515277	0.262053	0.588293	-0.270004	-0.426181	-0.113826	0.0012194	0.0034121	0.00930954	-0.101387	0.120006	0.865631	0.996817	-0.181825	-0.304382	-0.0592675	0.00473079	0.0098302	-0.116266	-0.24144	0.00890836	0.0677233	0.436487	-0.0788693	-0.243666	0.0859276	0.338517	0.59925	-0.199469	-0.343898	-0.0550404	0.00810489	0.0389268	-0.00882749	-0.183589	0.165934
ENSMUSG00000005683	12974	Cs	protein_coding	MGI Symbol	2	Citrate synthase, mitochondrial [Source:UniProtKB/Swiss-Prot;Acc:Q9CZU6]	-0.749807	-1.01967	-0.47994	1.97953e-06	1.07746e-05	-0.0478493	-0.263452	0.167753	0.655588	0.856486	-0.22293	-0.502353	0.0564935	0.114483	0.17381	0.0668362	-0.136366	0.270039	0.509289	0.983698	-0.360717	-0.588269	-0.133166	0.00272669	0.00602954	-0.299951	-0.534073	-0.0658283	0.0134477	0.187993	0.204624	-0.0929768	0.502224	0.1719	0.416496	-0.396114	-0.670996	-0.121231	0.00592899	0.0309236	-0.574727	-0.897869	-0.251584
ENSMUSG00000005686	11717	Ampd3	protein_coding	MGI Symbol	8	AMP deaminase 3 [Source:UniProtKB/Swiss-Prot;Acc:O08739]	0.0741592	-0.201449	0.349768	0.588915	0.660812	0.470185	0.24306	0.697309	0.000163375	0.0113575	0.511703	0.169588	0.853818	0.00443384	0.0105288	-0.343001	-0.549472	-0.13653	0.001787	0.429774	0.351347	0.10333	0.599363	0.00673896	0.0134852	-0.0321918	-0.272924	0.20854	0.787949	0.960898	-0.182644	-0.551324	0.186036	0.322032	0.584519	-0.299143	-0.592372	-0.00591339	0.045778	0.131414	0.0326404	-0.343414	0.408695
ENSMUSG00000005687	68183	Bcas2	protein_coding	MGI Symbol	6	breast carcinoma amplified sequence 2 [Source:MGI Symbol;Acc:MGI:1915433]	-0.166699	-0.351485	0.0180863	0.0756446	0.115985	-0.00396005	-0.159722	0.151802	0.959197	0.986622	-0.526974	-0.731271	-0.322677	6.95496e-06	3.66724e-05	0.0778357	-0.0678792	0.223551	0.286139	0.972308	-0.0653132	-0.226376	0.0957495	0.416567	0.4911	-0.0496618	-0.213635	0.114312	0.54322	0.896025	-0.383825	-0.599338	-0.168313	0.000904232	0.0208955	-0.0713749	-0.261227	0.118477	0.451066	0.624387	0.356315	0.129112	0.583518
ENSMUSG00000005698	13018	Ctcf	protein_coding	MGI Symbol	6	Mus musculus CCCTC-binding factor (Ctcf), transcript variant 2, mRNA. [Source:RefSeq mRNA;Acc:NM_001358924]	0.597795	0.46757	0.72802	3.10652e-11	1.1023e-09	-0.0629812	-0.170202	0.0442395	0.241578	0.568299	0.34758	0.201628	0.493532	2.40673e-05	0.0001089	-0.00150052	-0.102339	0.099338	0.976111	0.998763	0.518842	0.405295	0.63239	3.50525e-11	9.05616e-10	0.0535993	-0.0608726	0.168071	0.348943	0.787344	-0.172763	-0.327768	-0.0177579	0.0299087	0.15893	-0.0265335	-0.161821	0.108755	0.693384	0.814709	0.187234	0.0236364	0.350831
ENSMUSG00000005699	56513	Pard6a	protein_coding	MGI Symbol	7	Partitioning defective 6 homolog alpha [Source:UniProtKB/Swiss-Prot;Acc:Q9Z101]	-0.714224	-0.993694	-0.434755	8.07967e-06	3.65867e-05	0.177513	-0.085096	0.440122	0.179077	0.492824	-0.646039	-0.970723	-0.321356	0.000265036	0.000885691	0.0142117	-0.223864	0.252288	0.904391	0.998135	-0.442801	-0.685906	-0.199697	0.00071545	0.00183374	-0.0272085	-0.293033	0.238616	0.836853	0.971307	-0.189026	-0.517415	0.139362	0.250973	0.511036	0.0451654	-0.233767	0.324098	0.744714	0.848088	0.109328	-0.229137	0.447794
ENSMUSG00000005718	83383	Tfap4	protein_coding	MGI Symbol	3	transcription factor AP4 [Source:MGI Symbol;Acc:MGI:103239]	-0.420185	-0.791404	-0.0489652	0.027598	0.0480497	0.0782108	-0.260271	0.416693	0.642426	0.849958	-0.620701	-1.05053	-0.190872	0.0058349	0.0133907	0.137725	-0.169682	0.445132	0.369898	0.983698	-0.449275	-0.76252	-0.13603	0.00614405	0.0124152	-0.151365	-0.483538	0.180809	0.361863	0.796123	-0.0337019	-0.467726	0.400322	0.875846	0.94944	0.326152	-0.0470526	0.699357	0.0848484	0.201707	0.278728	-0.177328	0.734784
ENSMUSG00000005774	53970	Rfx5	protein_coding	MGI Symbol	17	Mus musculus regulatory factor X, 5 (influences HLA class II expression) (Rfx5), transcript variant 2, mRNA. [Source:RefSeq mRNA;Acc:NM_001355705]	0.0428114	-0.259786	0.345408	0.775983	0.823543	0.235523	-0.0196198	0.490666	0.06936	0.311334	0.218014	-0.150351	0.586379	0.2381	0.320597	0.040608	-0.190192	0.271408	0.723511	0.990955	0.231561	-0.0288499	0.491973	0.079747	0.119005	0.135459	-0.127568	0.398485	0.303517	0.758618	0.0270608	-0.360545	0.414667	0.888283	0.955136	0.102561	-0.217855	0.422976	0.520656	0.681629	0.0603203	-0.34237	0.463011
ENSMUSG00000005779	19172	Psmb4	protein_coding	MGI Symbol	5	Proteasome subunit beta type-4 [Source:UniProtKB/Swiss-Prot;Acc:P99026]	0.0603335	-0.178498	0.299165	0.611818	0.682144	-0.057439	-0.253677	0.138799	0.55677	0.802995	0.201524	-0.0521359	0.455184	0.115964	0.175794	0.0545854	-0.130211	0.239382	0.553179	0.983698	0.0783809	-0.125977	0.282739	0.442045	0.516727	0.0634425	-0.146646	0.273531	0.544392	0.896967	0.177729	-0.0905174	0.445974	0.18764	0.437737	0.359266	0.119915	0.598616	0.00430964	0.0247361	-0.198629	-0.486509	0.0892503
ENSMUSG00000005802	22785	Slc30a4	protein_coding	MGI Symbol	2	Zinc transporter 4 [Source:UniProtKB/Swiss-Prot;Acc:O35149]	0.413329	0.177357	0.6493	0.00107058	0.00272834	-0.0545721	-0.24847	0.139326	0.571969	0.810581	0.887593	0.562069	1.21312	2.74642e-06	1.64595e-05	0.0394032	-0.142469	0.221275	0.66325	0.988678	0.583046	0.369246	0.796847	2.73956e-06	1.30996e-05	0.0281691	-0.17668	0.233018	0.7821	0.960646	0.343949	-0.000432796	0.688332	0.050274	0.213928	0.0709392	-0.19779	0.339668	0.595961	0.743635	-0.528836	-0.881046	-0.176626
ENSMUSG00000005803	59010	Sqor	protein_coding	MGI Symbol	9	Sulfide:quinone oxidoreductase, mitochondrial [Source:UniProtKB/Swiss-Prot;Acc:Q9R112]	0.344139	0.187452	0.500826	7.57045e-05	0.000261075	-0.147676	-0.277261	-0.0180918	0.026623	0.185125	0.458433	0.293807	0.623058	1.90265e-06	1.20184e-05	0.0722026	-0.0495564	0.193962	0.237204	0.953764	0.190077	0.0559754	0.324179	0.00671142	0.0134384	0.0303202	-0.108365	0.169005	0.660382	0.932685	0.340558	0.166605	0.514511	0.000320791	0.0124362	0.175398	0.018471	0.332325	0.0294777	0.0971095	-0.26197	-0.44868	-0.0752612
ENSMUSG00000005804	18457	Bloc1s6	protein_coding	MGI Symbol	6	Biosis of lysosome-related organelles complex 1 subunit 6 [Source:UniProtKB/Swiss-Prot;Acc:Q9R0C0]	0.428673	0.265227	0.592118	5.29458e-06	2.53262e-05	0.0486999	-0.0847008	0.182101	0.464182	0.748304	0.210891	0.016872	0.40491	0.0339451	0.0614589	-0.0305787	-0.15516	0.0940022	0.62192	0.986262	0.354386	0.210802	0.49797	1.39982e-05	5.53577e-05	-0.136675	-0.275602	0.00225165	0.0536356	0.389796	-0.174073	-0.380808	0.0326615	0.0963821	0.303753	-0.108273	-0.28133	0.0647828	0.212846	0.381747	0.266482	0.0506992	0.482264
ENSMUSG00000005813	75624	Metap1	protein_coding	MGI Symbol	7	Methionine aminopeptidase 1 [Source:UniProtKB/Swiss-Prot;Acc:Q8BP48]	0.246823	0.0803379	0.413308	0.00475703	0.0102607	-0.107997	-0.246125	0.030131	0.121669	0.406931	0.0296969	-0.157641	0.217035	0.749888	0.807061	0.0916304	-0.0382202	0.221481	0.161179	0.934297	0.207777	0.0627896	0.352763	0.00618256	0.0124814	0.0420101	-0.105002	0.189022	0.566121	0.906003	-0.0864492	-0.284579	0.111681	0.382389	0.635782	0.0681636	-0.104562	0.240889	0.429069	0.604767	0.109129	-0.0999962	0.318254
ENSMUSG00000005823	78308	Gpr108	protein_coding	MGI Symbol	1	G protein-coupled receptor 108 [Source:MGI Symbol;Acc:MGI:1925558]	-0.574893	-0.768758	-0.381029	6.06269e-07	3.84829e-06	-0.0578998	-0.220624	0.104824	0.475499	0.756132	-0.678985	-0.891601	-0.46637	1.43737e-07	1.29543e-06	-0.0381515	-0.191397	0.115094	0.616972	0.98603	-0.445099	-0.613471	-0.276726	4.64298e-06	2.08501e-05	0.181002	0.00593843	0.356066	0.0430806	0.346862	-0.272038	-0.495802	-0.0482747	0.0185361	0.121273	-0.120892	-0.318213	0.0764278	0.222295	0.392248	0.0461922	-0.191104	0.283488
ENSMUSG00000005836	14465	Gata6	protein_coding	MGI Symbol	1	Transcription factor GATA-6 [Source:UniProtKB/Swiss-Prot;Acc:Q61169]	-0.874807	-1.17042	-0.579189	6.30476e-07	3.98806e-06	0.129978	-0.142452	0.402409	0.339993	0.659471	-0.576424	-0.924176	-0.228671	0.00182434	0.00485704	0.217161	-0.0284126	0.462734	0.0813571	0.865343	-0.477112	-0.730486	-0.223738	0.000499135	0.00133243	-0.0918299	-0.359313	0.175653	0.491045	0.873683	0.117849	-0.235456	0.471153	0.503359	0.731153	0.230225	-0.0665889	0.52704	0.124561	0.264412	-0.168405	-0.534606	0.197796
ENSMUSG00000005846	66409	Rsl1d1	protein_coding	MGI Symbol	5	Ribosomal L1 domain-containing protein 1 [Source:UniProtKB/Swiss-Prot;Acc:Q8BVY0]	1.20292	0.996703	1.40915	3.84673e-14	7.01844e-12	-0.183966	-0.347482	-0.0204506	0.0284891	0.192201	1.00697	0.754169	1.25978	1.09818e-09	2.30032e-08	0.101148	-0.0527998	0.255095	0.191265	0.941964	1.072	0.890024	1.25398	2.87563e-14	3.16891e-12	-0.0283554	-0.20223	0.145519	0.742957	0.951462	0.0361201	-0.234668	0.306908	0.788469	0.90634	-0.301253	-0.520501	-0.0820054	0.00840527	0.0399851	0.0119833	-0.270329	0.294295
ENSMUSG00000005871	11789	Apc	protein_coding	MGI Symbol	9	APC, WNT signaling pathway regulator [Source:HGNC Symbol;Acc:HGNC:583]	0.823902	0.649936	0.997868	1.35968e-11	5.86652e-10	-0.0854479	-0.229965	0.0590693	0.238551	0.564218	0.68037	0.489118	0.871623	1.47972e-08	1.94505e-07	-0.050184	-0.185912	0.0855435	0.458522	0.983698	0.73937	0.588758	0.889982	5.16239e-12	1.82184e-10	0.0978657	-0.0560771	0.251808	0.205726	0.672582	-0.109184	-0.311272	0.092904	0.280743	0.541916	-0.187898	-0.36529	-0.0105052	0.0384829	0.116907	0.0580841	-0.156291	0.272459
ENSMUSG00000005873	13476	Reep5	protein_coding	MGI Symbol	1	receptor accessory protein 5 [Source:MGI Symbol;Acc:MGI:1270152]	-0.594184	-0.827555	-0.360813	8.57998e-06	3.86367e-05	0.00250243	-0.202665	0.20767	0.980418	0.992759	-0.202242	-0.482787	0.0783027	0.152562	0.221848	0.0902346	-0.100481	0.28095	0.343975	0.979365	-0.0278478	-0.237515	0.18182	0.78935	0.829124	-0.387881	-0.59524	-0.180521	0.00053704	0.0303241	-0.0841596	-0.377917	0.209598	0.565129	0.773853	-0.221648	-0.465769	0.0224723	0.0738535	0.182727	-0.389439	-0.691224	-0.0876554
ENSMUSG00000005881	66366	Ergic3	protein_coding	MGI Symbol	10	Mus musculus ERGIC and golgi 3 (Ergic3), transcript variant 2, mRNA. [Source:RefSeq mRNA;Acc:NM_001356414]	-0.671542	-0.815798	-0.527285	2.14838e-11	8.23217e-10	-0.0303682	-0.146688	0.0859514	0.599997	0.828953	-0.859929	-1.01414	-0.705717	1.43547e-13	3.15973e-11	0.0212902	-0.0881932	0.130774	0.695852	0.990173	-0.531468	-0.654057	-0.408879	1.35831e-10	2.77802e-09	-0.0114385	-0.135954	0.113077	0.853367	0.975588	-0.307171	-0.470948	-0.143394	0.000521578	0.0157896	0.0325683	-0.113549	0.178685	0.6542	0.788208	0.158019	-0.0182224	0.334261
ENSMUSG00000005882	56046	Uqcc1	protein_coding	MGI Symbol	19	ubiquinol-cytochrome c reductase complex assembly factor 1 [Source:MGI Symbol;Acc:MGI:1929472]	0.474267	0.313319	0.635215	6.82558e-07	4.26377e-06	0.0224196	-0.109666	0.154506	0.732875	0.892271	0.374023	0.188842	0.559203	0.000221376	0.000759782	-0.0940269	-0.218304	0.0302503	0.133795	0.9248	0.0902936	-0.0488232	0.22941	0.196588	0.259777	0.0158597	-0.125347	0.157067	0.821244	0.968156	0.189702	-0.00574742	0.385151	0.0567638	0.227387	0.108368	-0.0575346	0.27427	0.193803	0.35803	0.122664	-0.0840955	0.329423
ENSMUSG00000005886	17978	Ncoa2	protein_coding	MGI Symbol	11	Nuclear receptor coactivator 2 [Source:UniProtKB/Swiss-Prot;Acc:Q61026]	0.104558	-0.0828009	0.291917	0.265464	0.341007	-0.00474665	-0.159073	0.149579	0.950647	0.983312	0.212511	0.0129528	0.412069	0.037511	0.0669537	-0.0327101	-0.177918	0.112498	0.650773	0.988678	0.228909	0.0689427	0.388876	0.00625076	0.0126093	0.030121	-0.134805	0.195047	0.713474	0.945818	-0.0491084	-0.259649	0.161432	0.639292	0.820485	-0.228922	-0.418135	-0.0397081	0.0190703	0.0712911	-0.1127	-0.338776	0.113376
ENSMUSG00000005893	22026	Nr2c2	protein_coding	MGI Symbol	8	nuclear receptor subfamily 2, group C, member 2 [Source:MGI Symbol;Acc:MGI:1352466]	0.500734	0.206538	0.794932	0.00141992	0.00350645	-0.102768	-0.344138	0.138602	0.393893	0.69943	0.676497	0.302734	1.05026	0.000764763	0.00225206	0.0792539	-0.147543	0.306051	0.483379	0.983698	0.607399	0.343869	0.87093	3.87548e-05	0.000137629	-0.0416752	-0.296344	0.212993	0.742098	0.951124	0.148352	-0.248776	0.545479	0.453925	0.695755	-0.0850255	-0.405549	0.235498	0.594173	0.74233	-0.278531	-0.688398	0.131337
ENSMUSG00000005897	22025	Nr2c1	protein_coding	MGI Symbol	3	Nuclear receptor subfamily 2 group C member 1 [Source:UniProtKB/Swiss-Prot;Acc:Q505F1]	0.465023	0.27105	0.658997	2.17955e-05	8.73098e-05	0.272524	0.116302	0.428746	0.00111525	0.0343989	0.662561	0.428781	0.896341	1.39169e-06	9.19616e-06	0.0692911	-0.0739436	0.212526	0.333385	0.979137	0.72973	0.561506	0.897955	1.33894e-10	2.74272e-09	0.113634	-0.048806	0.276075	0.164744	0.620513	0.00212157	-0.247751	0.251995	0.986368	0.994153	-0.296433	-0.498461	-0.0944046	0.00516008	0.028051	0.0749867	-0.185538	0.335512
ENSMUSG00000005899	77626	Smpd4	protein_coding	MGI Symbol	4	sphingomyelin phosphodiesterase 4 [Source:MGI Symbol;Acc:MGI:1924876]	-0.338003	-0.497922	-0.178084	0.000125535	0.00040809	-0.0530931	-0.190108	0.0839221	0.437396	0.733057	-0.521286	-0.701608	-0.340963	9.71853e-07	6.67096e-06	0.00937556	-0.11944	0.138192	0.883569	0.99766	-0.46081	-0.600293	-0.321327	7.19321e-08	5.63439e-07	-0.0743254	-0.218971	0.0703196	0.304586	0.759796	-0.0510997	-0.23919	0.136991	0.585332	0.786112	-0.194016	-0.35524	-0.0327924	0.0196733	0.0727913	0.130189	-0.0680956	0.328474
ENSMUSG00000005907	71382	Pex1	protein_coding	MGI Symbol	14	Peroxisome biosis factor 1 [Source:UniProtKB/Swiss-Prot;Acc:Q5BL07]	0.43582	0.251088	0.620552	2.76485e-05	0.000107861	0.000748186	-0.151192	0.152688	0.992093	0.997403	0.164933	-0.043811	0.373677	0.117905	0.17822	0.00975108	-0.132902	0.152404	0.890603	0.997726	-0.115544	-0.273551	0.0424634	0.146909	0.202323	0.075751	-0.0861947	0.237697	0.349426	0.787437	0.290228	0.0707046	0.509751	0.010955	0.0904336	0.163448	-0.0241157	0.351011	0.0857068	0.203227	0.271636	0.0379385	0.505333
ENSMUSG00000005936	66989	Kctd20	protein_coding	MGI Symbol	8	Mus musculus potassium channel tetramerisation domain containing 20 (Kctd20), transcript variant 3, mRNA. [Source:RefSeq mRNA;Acc:NM_001356299]	0.107946	-0.0480844	0.263977	0.169332	0.232784	0.0014293	-0.12818	0.131038	0.982295	0.993624	0.336325	0.156283	0.516367	0.000545088	0.00167314	0.0213607	-0.10033	0.143051	0.724131	0.990955	0.0692601	-0.066237	0.204757	0.30709	0.380024	-0.0573845	-0.195049	0.0802797	0.403787	0.82431	0.288425	0.0987781	0.478073	0.00387272	0.0482115	0.269025	0.106849	0.431201	0.0018113	0.0134327	-0.226949	-0.426855	-0.0270438
ENSMUSG00000005949	83429	Ctns	protein_coding	MGI Symbol	5	Mus musculus cystinosis, nephropathic (Ctns), transcript variant 2, mRNA. [Source:RefSeq mRNA;Acc:NM_001357891]	-0.389237	-0.56874	-0.209734	8.9838e-05	0.000303361	-0.122819	-0.277127	0.0314875	0.11531	0.396487	-0.411958	-0.618119	-0.205796	0.000251918	0.000850225	-0.0486244	-0.194894	0.0976453	0.504801	0.983698	-0.322147	-0.481884	-0.16241	0.000225459	0.000653578	0.0479479	-0.118357	0.214253	0.562671	0.903912	-0.138435	-0.35436	0.0774902	0.201985	0.453917	0.0922001	-0.0954333	0.279834	0.325919	0.504415	-0.100099	-0.325738	0.12554
ENSMUSG00000005951	74637	Shpk	protein_coding	MGI Symbol	2	Sedoheptulokinase [Source:UniProtKB/Swiss-Prot;Acc:Q9D5J6]	0.0501245	-0.15283	0.253078	0.619768	0.688649	-0.119448	-0.286591	0.0476956	0.156052	0.459778	-0.155818	-0.374859	0.0632234	0.157908	0.22807	-0.0445677	-0.201567	0.112431	0.568677	0.983698	-0.334789	-0.509457	-0.160122	0.000409218	0.00111392	0.0305949	-0.147658	0.208848	0.730001	0.948525	0.134404	-0.097629	0.366436	0.248053	0.507011	-0.0367212	-0.244056	0.170614	0.721758	0.833443	0.0864949	-0.160957	0.333947
ENSMUSG00000005968	22156	Tuft1	protein_coding	MGI Symbol	6	tuftelin 1 [Source:MGI Symbol;Acc:MGI:109572]	-0.052526	-0.572315	0.467263	0.8389	0.872491	0.183473	-0.261082	0.628028	0.40842	0.711776	0.24183	-0.412378	0.896038	0.458628	0.547394	0.181115	-0.216607	0.578837	0.362174	0.983698	1.00052	0.509055	1.49199	0.000201042	0.000589776	0.572863	0.0974725	1.04825	0.0195187	0.229402	-0.577576	-1.29266	0.137507	0.110209	0.32526	-0.559016	-1.15198	0.0339483	0.0638852	0.165767	-0.110883	-0.818371	0.596605
ENSMUSG00000005973	19672	Rcn1	protein_coding	MGI Symbol	2	Reticulocalbin-1 [Source:UniProtKB/Swiss-Prot;Acc:Q05186]	0.406448	0.14865	0.664246	0.00285856	0.00651073	0.25503	0.0482422	0.461818	0.0170217	0.145626	1.04709	0.694474	1.3997	5.90865e-07	4.35009e-06	-0.0661045	-0.254563	0.122354	0.481744	0.983698	0.641116	0.413801	0.868431	1.51807e-06	7.8672e-06	-0.156461	-0.365903	0.0529816	0.138626	0.585211	0.339866	-0.0349557	0.714687	0.0742214	0.26319	-0.112196	-0.394087	0.169696	0.425167	0.600899	-0.385608	-0.77036	-0.000856052
ENSMUSG00000005980	13419	Dnase1	protein_coding	MGI Symbol	11	Mus musculus deoxyribonuclease I (Dnase1), transcript variant 2, mRNA. [Source:RefSeq mRNA;Acc:NM_001357143]	0.342828	-0.0401728	0.725829	0.0778504	0.118737	-0.0402672	-0.358666	0.278131	0.799192	0.919805	0.0933308	-0.375415	0.562077	0.688975	0.755701	-0.335435	-0.648106	-0.0227644	0.0361973	0.786728	-0.411092	-0.747799	-0.0743844	0.0180771	0.0320327	0.129365	-0.242913	0.501643	0.485811	0.872818	0.168988	-0.316122	0.654097	0.484747	0.718279	0.46335	0.0509988	0.875702	0.0286734	0.095369	0.20923	-0.305585	0.724045
ENSMUSG00000005981	68015	Trap1	protein_coding	MGI Symbol	4	Heat shock protein 75 kDa, mitochondrial [Source:UniProtKB/Swiss-Prot;Acc:Q9CQN1]	-0.344808	-0.508408	-0.181209	0.000130163	0.000420924	-0.0237505	-0.156429	0.108928	0.718908	0.886703	-0.49771	-0.671764	-0.323656	1.18508e-06	7.94972e-06	0.00414118	-0.120784	0.129066	0.946814	0.998763	-0.506996	-0.647271	-0.366721	1.04127e-08	1.05896e-07	0.0132036	-0.128938	0.155345	0.851748	0.97468	0.0134274	-0.171952	0.198807	0.884126	0.953587	0.103412	-0.0637794	0.270602	0.217998	0.387667	0.129151	-0.0694846	0.327786
ENSMUSG00000005982	74763	Naa60	protein_coding	MGI Symbol	12	N-alpha-acetyltransferase 60 [Source:UniProtKB/Swiss-Prot;Acc:Q9DBU2]	0.260171	0.0646492	0.455692	0.0104903	0.0206452	-0.141386	-0.302781	0.0200095	0.0841322	0.342122	-0.224975	-0.435439	-0.0145117	0.0368333	0.0659435	-0.063261	-0.214622	0.0881	0.402555	0.983698	-0.225693	-0.3939	-0.057486	0.00991505	0.0189753	0.0580547	-0.113683	0.229793	0.497679	0.878588	-0.0625433	-0.28543	0.160343	0.573114	0.779354	0.23729	0.038712	0.435869	0.0204882	0.0748636	0.34376	0.106115	0.581405
ENSMUSG00000005983	73261	1700037C18Rik	protein_coding	MGI Symbol	6	RIKEN cDNA 1700037C18 gene [Source:MGI Symbol;Acc:MGI:1920511]	0.17206	-0.330052	0.674171	0.491846	0.571138	-0.504278	-0.95702	-0.0515353	0.0300102	0.198707	0.109559	-0.604897	0.824016	0.757782	0.81313	-0.0745394	-0.531554	0.382475	0.742924	0.990955	-0.237178	-0.720364	0.246007	0.326425	0.400046	-0.0579324	-0.57239	0.456525	0.820785	0.968156	0.272198	-0.459275	1.00367	0.455653	0.697052	-0.4346	-0.966355	0.0971556	0.10619	0.236149	-0.441778	-1.1885	0.30494
[truncated: 12,279 more rows]
[truncated: 18 more columns]

## Sheet: C. ChIP-Seq_Pio_v_Control
Category	Chromosome	Strand	Loci Start	Loci End	Distance to TSS	Gene Symbol	Description
Downstream	chr13	-	3556928	3556986	53397	BC016423	peripherial benzodiazepine receptor associated
[truncated: 4,054 more rows]

## Sheet: D. ChIP_Seq_HFDPio_v_HFD
Category	Chromosome	Strand	Loci Start	Loci End	Distance to TSS	Gene Symbol	Description
[truncated: 2,416 more rows]

[truncated: 1 more sheets: E. BETA Results]
