# Supplementary material for: Diet Modifies Pioglitazone's Influence on Hepatic PPARγ-Regulated Mitochondrial Gene Expression
Source: PPAR Res. 2020 Sep 10;2020:3817573. doi: 10.1155/2020/3817573 (PMC7501566; doi:10.1155/2020/3817573)
Supplement: Supplementary Materials — Supplementary Figure S1: immunoblot analysis of the anti-RXRα/β/γ (Santa Cruz sc-774) antibody that was used for the ChIP-Seq studies reported here. The predominant detectable band in all liver samples (i.e., from control, Pio-treated, HFD-treated, and HFD-Pio-treated mice) is ~53 kDa band, which is the molecular weight of RXR, and accounts for >50% of the total detected signal in each lane (average 81% across all samples, as assessed using Odyssey Infrared Imaging System Application Software Version 3.0.21, Licor Biosciences), which is consistent with the ENCODE and modENCODE guidelines [37, 61]. Supplementary Figure S2: the left panel shows initial body weights (in grams) of WT and KO mice (as designated) that were subsequently assigned to the indicated experimental groups (no significant differences between groups). The right panel shows a summary of initial body weights in all WT versus all KO mice (p < 0.05). Supplementary Figure S3: summary of RT-qPCR based analyses of exemplar genes whose RNA-Seq based patterns of expression are depicted in Figure 3. Supplementary Table S1: gene-specific oligonucleotide primers for RT-qPCR. Supplementary Table S2: RNA-Seq, ChIP-Seq, and BETA Analyses Results—see excel Table S2. This excel spreadsheet contains (A) List of Experimental Groups, (B) a merged summary of all RNA-Seq differential expression analyses, summaries of differentially RXR-bound peaks identified by ChIP-Seq analyses of liver samples from wildtype (C) Pio vs. control or (D) HFD-Pio-treated vs. HFD-treated mice, and (E) summary lists from BETA analyses of RNA- and ChIP-Seq data from comparisons of Pio vs. control and HFD-Pio vs. HFD (including rank, Gene name, and rank product). Supplementary Table S3: GAGE results—see excel Table S3: this excel spreadsheet contains GAGE gene set expression perturbation test results for all comparisons between groups conducted by Limma. Log 2 fold changes of all genes within specific gene sets were compared to all those outsi [file 3817573.f1.zip › Supplementary Table S3 - GAGE Results.xlsx]

## Sheet: All_Merged_MSigDB_Hallmark_Gene
Term_ID	Control_KO-Control_WT_mean_logFC	Control_KO-Control_WT_P.value	Control_KO-Control_WT_FDR	HFD_KO-Control_KO_mean_logFC	HFD_KO-Control_KO_P.value	HFD_KO-Control_KO_FDR	HFD_KO-HFD_WT_mean_logFC	HFD_KO-HFD_WT_P.value	HFD_KO-HFD_WT_FDR	HFD_Pio_KO-HFD_KO_mean_logFC	HFD_Pio_KO-HFD_KO_P.value	HFD_Pio_KO-HFD_KO_FDR	HFD_Pio_KO-HFD_Pio_WT_mean_logFC	HFD_Pio_KO-HFD_Pio_WT_P.value	HFD_Pio_KO-HFD_Pio_WT_FDR	HFD_Pio_KO-Pio_KO_mean_logFC	HFD_Pio_KO-Pio_KO_P.value	HFD_Pio_KO-Pio_KO_FDR	HFD_Pio_WT-HFD_WT_mean_logFC	HFD_Pio_WT-HFD_WT_P.value	HFD_Pio_WT-HFD_WT_FDR	HFD_Pio_WT-Pio_WT_mean_logFC	HFD_Pio_WT-Pio_WT_P.value	HFD_Pio_WT-Pio_WT_FDR	HFD_WT-Control_WT_mean_logFC	HFD_WT-Control_WT_P.value	HFD_WT-Control_WT_FDR	Pio_KO-Control_KO_mean_logFC	Pio_KO-Control_KO_P.value	Pio_KO-Control_KO_FDR	Pio_KO-Pio_WT_mean_logFC	Pio_KO-Pio_WT_P.value	Pio_KO-Pio_WT_FDR	Pio_WT-Control_WT_mean_logFC	Pio_WT-Control_WT_P.value	Pio_WT-Control_WT_FDR
HALLMARK_FATTY_ACID_METABOLISM	0.401442	0.344195	0.999958	-0.501255	0.308336	0.986404	-2.13894	0.0166565	0.0832826	0.811858	0.208767	0.501265	-4.00975	4.14902e-05	0.000691503	0.542294	0.294026	0.980087	4.61939	3.12173e-06	9.38241e-05	3.47053	0.000303319	0.00393146	3.46823	0.000309552	0.0077388	-0.591251	0.277406	0.999898	-2.53908	0.00588592	0.0809667	3.63911	0.000167849	0.00419623
HALLMARK_OXIDATIVE_PHOSPHORYLATION	-0.80797	0.209814	0.430294	-3.09006	0.00110839	0.038092	-1.7609	0.0395245	0.164685	1.99359	0.0236164	0.295205	-4.13875	2.17434e-05	0.000543585	0.588715	0.278223	0.980087	4.54639	3.75296e-06	9.38241e-05	4.06439	2.93462e-05	0.00092226	0.0305026	0.487842	0.999927	-1.75468	0.040128	0.5016	-1.67903	0.0469926	0.26107	0.0574716	0.4771	0.945238
HALLMARK_ADIPOGENESIS	-1.50306	0.066824	0.16706	-1.15511	0.124386	0.853971	-2.15016	0.0160842	0.0832826	0.11038	0.456083	0.651547	-4.14629	2.15031e-05	0.000543585	-1.25379	0.10534	0.478817	4.04263	3.28216e-05	0.000547027	0.459257	0.323158	0.999293	0.545231	0.292956	0.956926	0.22338	0.41168	0.709792	-3.30141	0.000536814	0.0268407	3.09414	0.00107571	0.0179286
HALLMARK_INTERFERON_ALPHA_RESPONSE	1.27635	0.101681	0.672822	1.37835	0.0849612	0.531007	0.756788	0.225049	0.865573	1.42934	0.0774011	0.404327	2.97505	0.00165888	0.027648	0.275477	0.391656	0.999872	-3.03183	0.0013987	0.0308507	-2.05592	0.0205848	0.173517	1.84858	0.033062	0.413275	1.74768	0.0412204	0.147216	1.54656	0.0618292	0.405861	0.87057	0.192571	0.687755
HALLMARK_G2M_CHECKPOINT	-0.0262477	0.489537	0.764902	0.82134	0.206013	0.658347	0.148943	0.440843	0.99951	-1.09129	0.137955	0.999961	1.71532	0.0436077	0.272548	-3.69606	0.00012815	0.0064075	-2.92244	0.00185104	0.0308507	-1.99527	0.023399	0.173517	0.365248	0.357584	0.956926	3.31837	0.000501794	0.0101077	2.14954	0.0161439	0.214864	-0.36619	0.357226	0.882362
HALLMARK_INTERFERON_GAMMA_RESPONSE	0.271772	0.392974	0.999958	2.7791	0.00286919	0.0717297	1.14069	0.127363	0.661527	2.49109	0.00658605	0.109768	3.75817	9.94558e-05	0.00248639	0.477457	0.31666	0.987643	-3.04475	0.00125124	0.0308507	-2.80629	0.00263625	0.0659062	0.260237	0.397412	0.956926	3.26142	0.00060646	0.0101077	1.7163	0.04348	0.362333	0.397569	0.34559	0.909446
HALLMARK_PEROXISOME	0.197309	0.421897	0.999958	0.675971	0.249994	0.658347	-0.872376	0.192051	0.430577	0.135613	0.446138	0.651547	-2.36465	0.00954433	0.0681738	0.949728	0.171724	0.923859	2.798	0.00283409	0.0354262	2.9617	0.00174403	0.0174403	1.86347	0.0321524	0.413275	-0.0408868	0.483714	0.999898	-0.79433	0.213994	0.563142	1.1599	0.123787	0.562668
HALLMARK_UNFOLDED_PROTEIN_RESPONSE	-1.05994	0.14519	0.329977	-2.99749	0.00152368	0.038092	-1.47474	0.0708879	0.221525	0.642825	0.260538	0.521075	0.216856	0.414269	0.901866	0.0785605	0.468729	0.999872	-2.76007	0.00315695	0.0394619	-0.692403	0.244726	0.542478	-1.37845	0.0847595	0.529747	-2.33254	0.010326	0.258149	-0.277752	0.39074	0.69775	-2.89013	0.00213961	0.0534903
HALLMARK_UV_RESPONSE_DN	2.2072	0.0140962	0.223772	0.725839	0.234305	0.658347	2.27201	0.0119579	0.253083	0.0567339	0.477401	0.663057	0.786645	0.216113	0.675353	0.793716	0.214051	0.923859	2.41258	0.00827556	0.0827556	-1.61127	0.0541771	0.229526	0.324599	0.372879	0.956926	-0.0398368	0.484127	0.999898	-0.506581	0.306445	0.612889	3.74339	0.000112111	0.00419623
HALLMARK_HEME_METABOLISM	-3.77571	9.61999e-05	0.002405	1.56691	0.0590234	0.491861	-3.32862	0.00049011	0.0245055	0.774834	0.219486	0.501265	-2.38752	0.00875841	0.0681738	1.6076	0.0544228	0.680285	-2.29778	0.0110879	0.0923989	0.926287	0.177466	0.934531	0.51072	0.304934	0.956926	0.285486	0.387721	0.692358	-2.49862	0.00647733	0.0809667	-2.73383	0.00329423	0.0549038
HALLMARK_APICAL_JUNCTION	-1.86511	0.0315807	0.105269	1.6871	0.0463162	0.463162	-1.16458	0.122564	0.322537	-0.192549	0.423724	0.999961	0.212209	0.416045	0.901866	0.424391	0.335799	0.987643	-2.36529	0.00932841	0.0923989	-1.74636	0.0408909	0.208792	0.248636	0.401909	0.956926	0.962594	0.168266	0.467405	-1.11117	0.133698	0.417805	-0.243669	0.403828	0.882362
HALLMARK_E2F_TARGETS	0.0973783	0.461241	0.999958	0.445861	0.32799	0.697271	0.106997	0.457427	0.99951	-0.748955	0.227196	0.999961	1.24939	0.106205	0.521429	-2.42508	0.0079218	0.198045	-2.04	0.0210488	0.132839	-0.676638	0.24954	0.542478	0.287228	0.387054	0.956926	2.22845	0.0132412	0.0735621	2.03147	0.0214864	0.214864	-0.879871	0.189766	0.632553
HALLMARK_MITOTIC_SPINDLE	1.08006	0.140407	0.780041	0.828417	0.204002	0.658347	1.61421	0.0536666	0.447222	-1.81616	0.0350931	0.877328	2.40629	0.00831385	0.0831385	-1.94525	0.0262449	0.397675	-1.98603	0.023911	0.132839	-1.92133	0.0277628	0.173517	-0.547611	0.292159	0.635128	1.33234	0.0917839	0.305946	2.19372	0.0144598	0.214864	-0.414974	0.339222	0.882362
HALLMARK_ALLOGRAFT_REJECTION	2.1093	0.0179017	0.223772	0.936733	0.174846	0.658347	2.05456	0.0204121	0.253083	0.737921	0.230582	0.501265	3.79758	8.94556e-05	0.00248639	1.96877	0.0249747	0.416244	-1.99258	0.0236255	0.132839	-2.12789	0.0170992	0.173517	0.250645	0.401134	0.956926	-0.430532	0.33357	0.999898	1.45735	0.073055	0.405861	0.406807	0.342229	0.909446
HALLMARK_GLYCOLYSIS	-1.54555	0.061581	0.162055	-1.09738	0.136635	0.853971	-0.998797	0.15931	0.37931	0.276066	0.391336	0.611462	-1.9243	0.027588	0.153267	-1.05482	0.146136	0.562063	1.77036	0.0387919	0.323266	0.424746	0.335649	0.999293	-1.70662	0.0444141	0.444141	0.106427	0.457654	0.759244	-1.26773	0.10289	0.342967	-0.255733	0.399157	0.882362
HALLMARK_BILE_ACID_METABOLISM	2.13584	0.0169195	0.223772	2.03194	0.0217476	0.271845	0.514279	0.303797	0.99951	-2.00556	0.0231256	0.877328	-0.97374	0.165649	0.435918	3.00016	0.00152227	0.0761134	1.69948	0.0453525	0.323946	3.4707	0.000314517	0.00393146	4.0217	4.0715e-05	0.00203575	-2.02095	0.0222718	0.371197	-0.327702	0.371738	0.688404	1.79241	0.0372515	0.310429
HALLMARK_MYC_TARGETS_V2	-1.64337	0.0516355	0.151869	-1.77466	0.0395417	0.395417	-2.74821	0.00352839	0.0441048	0.485598	0.314126	0.572766	-1.64925	0.0510594	0.229901	-0.634454	0.263607	0.659018	-1.5243	0.0651309	0.325655	-0.425039	0.335832	0.62191	0.984586	0.163702	0.956926	-0.592403	0.277454	0.999898	-1.55055	0.0619149	0.278182	-0.238702	0.405886	0.882362
HALLMARK_KRAS_SIGNALING_UP	1.72686	0.0425973	0.425973	0.20612	0.418416	0.792934	1.9626	0.0253083	0.253083	-1.50137	0.0671707	0.999961	0.169189	0.432896	0.901866	-0.387979	0.349149	0.764391	1.56823	0.0591039	0.3694	-1.41865	0.0785037	0.261679	-0.718589	0.236468	0.622283	-0.536162	0.296118	0.999898	-0.330177	0.370783	0.688404	1.81915	0.0350764	0.310429
HALLMARK_COMPLEMENT	-0.406884	0.342177	0.611031	-0.248789	0.401843	0.999943	-0.303765	0.380748	0.679907	1.54587	0.0615458	0.384661	0.920949	0.178873	0.638831	0.787109	0.215889	0.923859	-1.246	0.106821	0.445086	-1.06761	0.143249	0.376971	-0.354672	0.361531	0.684295	0.0306659	0.487777	0.759244	-0.0836616	0.466689	0.752723	-0.445241	0.328222	0.882362
HALLMARK_PANCREAS_BETA_CELLS	-0.0620607	0.475451	0.764902	-0.671791	0.253279	0.957	-0.762933	0.225574	0.446507	-0.727311	0.23626	0.999961	-0.348451	0.364993	0.701909	-0.262083	0.397483	0.764391	-1.30552	0.100683	0.445086	-0.54774	0.293835	0.592279	0.881591	0.192305	0.956926	-0.845306	0.202646	0.999898	-0.566756	0.287431	0.612889	0.195504	0.423414	0.940637
HALLMARK_XENOBIOTIC_METABOLISM	-2.22388	0.0133673	0.0607606	-0.0877803	0.465048	0.999943	-2.995	0.00146122	0.0365306	0.812952	0.208379	0.501265	-3.54455	0.000220761	0.00275951	1.12265	0.131143	0.923859	1.34726	0.0893444	0.446722	4.00713	3.68904e-05	0.00092226	1.27142	0.102183	0.956926	-0.548819	0.291726	0.999898	-1.43278	0.0763654	0.293713	-1.31213	0.0951352	0.528529
HALLMARK_EPITHELIAL_MESENCHYMAL_TRANSITION	0.338409	0.367646	0.999958	0.0869961	0.465367	0.792934	-0.0379228	0.484887	0.791983	0.491043	0.31188	0.572766	-0.692648	0.244534	0.531596	0.767416	0.221726	0.923859	1.4008	0.081154	0.446722	0.890756	0.186906	0.934531	0.705297	0.240586	0.956926	-0.216154	0.414508	0.999898	-0.539367	0.295019	0.612889	0.979161	0.164145	0.634838
HALLMARK_ANGIOGENESIS	1.25673	0.107651	0.672822	-0.624512	0.26796	0.957	1.509	0.0690769	0.493406	1.00546	0.160233	0.501265	1.12183	0.134195	0.521429	0.886041	0.190211	0.923859	1.30699	0.0988619	0.449372	-0.505065	0.307985	0.592279	-1.15034	0.12816	0.593918	-0.68221	0.249468	0.999898	0.349478	0.364171	0.999463	0.631815	0.265403	0.884676
HALLMARK_UV_RESPONSE_UP	-2.38232	0.00894818	0.0447409	-1.2984	0.0976306	0.813588	-2.42743	0.00792784	0.0660653	2.60008	0.00493048	0.109768	-1.01817	0.154756	0.435918	-0.0661457	0.473655	0.845813	-1.08474	0.139498	0.53653	0.385226	0.35019	0.999293	-0.839015	0.201099	0.622283	0.524313	0.300274	0.625571	-0.651097	0.257774	0.58585	-1.95644	0.0257197	0.174179
HALLMARK_DNA_REPAIR	-1.26491	0.103503	0.246435	-0.936245	0.175022	0.957	-1.72197	0.043113	0.165819	1.18252	0.119122	0.496342	-0.988386	0.161951	0.435918	-0.875163	0.191258	0.637526	-0.974495	0.165422	0.541065	1.86157	0.0319001	0.227858	0.351529	0.362751	0.956926	0.55046	0.291256	0.625571	0.543127	0.293751	0.999463	-2.23794	0.0130781	0.134917
HALLMARK_PI3K_AKT_MTOR_SIGNALING	-0.0656948	0.473845	0.764902	-0.701064	0.242093	0.957	-0.0225176	0.491029	0.791983	-0.688607	0.245995	0.999961	0.330313	0.370767	0.882778	-0.00584869	0.49767	0.856889	-0.944296	0.173141	0.541065	-0.298306	0.38291	0.66019	-0.587241	0.278893	0.633847	-0.894228	0.186179	0.999898	0.16848	0.433198	0.999463	-1.04099	0.149701	0.623752
HALLMARK_KRAS_SIGNALING_DN	-1.9927	0.0240097	0.0857491	0.0608977	0.47576	0.792934	-1.04574	0.148649	0.371622	0.28118	0.38947	0.611462	-0.400646	0.344625	0.68925	-0.739137	0.23046	0.659018	-0.988681	0.162166	0.541065	-1.17052	0.121842	0.338451	-1.42455	0.0781308	0.529747	0.734859	0.231781	0.557271	-0.723754	0.235169	0.58585	-0.943589	0.173435	0.632553
HALLMARK_PROTEIN_SECRETION	3.46296	0.000337021	0.0168511	-1.99423	0.0240858	0.301073	2.95365	0.00178107	0.0890534	0.407198	0.342296	0.590166	2.85748	0.00241154	0.0301442	-0.265464	0.395565	0.764391	1.08402	0.140037	0.583488	-0.00172829	0.499312	0.832186	-1.12757	0.130662	0.593918	-1.2041	0.115407	0.999898	2.97686	0.00167435	0.0837175	0.0320061	0.487255	0.945238
HALLMARK_IL6_JAK_STAT3_SIGNALING	-1.59145	0.056867	0.157964	0.427939	0.33469	0.697271	-0.820421	0.206677	0.430577	1.8135	0.0361607	0.32233	0.440351	0.330191	0.825479	-0.661454	0.254752	0.659018	-0.847174	0.199163	0.585772	-0.812796	0.20885	0.497262	-0.834868	0.202643	0.622283	2.13366	0.0173524	0.0867621	0.226975	0.410391	0.999463	-0.694805	0.244157	0.762991
HALLMARK_TGF_BETA_SIGNALING	0.245536	0.403275	0.999958	-0.481384	0.315649	0.986404	0.482606	0.315215	0.99951	1.73638	0.0428289	0.32233	0.489372	0.312825	0.823224	-1.36682	0.0875035	0.478817	1.01838	0.155507	0.598103	-0.368491	0.356652	0.636878	-0.817557	0.207779	0.622283	1.25874	0.105808	0.330649	0.831246	0.203921	0.849669	0.508165	0.306253	0.909446
HALLMARK_MYC_TARGETS_V1	0.508921	0.305569	0.999958	-2.4558	0.00734598	0.122433	-0.245562	0.40308	0.694965	1.40286	0.0808655	0.404327	0.579196	0.281422	0.781727	-1.36845	0.0860476	0.478817	-0.734265	0.231632	0.602251	0.0507262	0.479785	0.999293	-0.285713	0.38764	0.692214	0.0636544	0.474643	0.759244	1.13532	0.128491	0.584048	-0.891794	0.186564	0.632553
HALLMARK_INFLAMMATORY_RESPONSE	0.624893	0.266278	0.999958	0.780466	0.217892	0.658347	1.11782	0.132305	0.661527	0.97505	0.165194	0.501265	2.02289	0.0220283	0.157345	0.590645	0.27762	0.980087	-0.774226	0.21973	0.602251	-0.844582	0.199535	0.497262	-0.399461	0.344933	0.684295	0.690596	0.245199	0.557271	1.23461	0.109024	0.54512	-0.172775	0.431478	0.898912
HALLMARK_IL2_STAT5_SIGNALING	-0.362433	0.358634	0.618334	0.674283	0.25031	0.658347	0.0519764	0.47929	0.99951	1.04418	0.148614	0.501265	0.84108	0.20046	0.6682	0.284865	0.387965	0.999872	-0.665994	0.252945	0.602251	-1.23309	0.109237	0.331945	-0.333414	0.369519	0.684295	1.00082	0.158828	0.467141	-0.161883	0.43575	0.751293	0.409487	0.341226	0.909446
HALLMARK_ESTROGEN_RESPONSE_LATE	-3.01355	0.00140187	0.0134484	2.48852	0.00670345	0.111724	-1.52914	0.0636352	0.212117	0.755796	0.225242	0.501265	-0.800231	0.212103	0.513791	-0.672785	0.250851	0.659018	-0.688388	0.245872	0.602251	-1.2142	0.112861	0.331945	-0.591192	0.277426	0.633847	2.72168	0.00347643	0.0434553	-1.3043	0.0965707	0.342967	0.169666	0.432693	0.940637
HALLMARK_NOTCH_SIGNALING	-1.71673	0.0455194	0.142248	1.21871	0.113832	0.6324	-0.82684	0.205756	0.430577	-0.0817057	0.467586	0.999961	-1.62242	0.0551763	0.229901	-1.57677	0.0600823	0.478817	0.944531	0.17429	0.622464	0.907195	0.183959	0.934531	-0.607263	0.272956	0.633847	1.92875	0.0294184	0.130823	-0.123504	0.451057	0.751762	-0.417464	0.338893	0.882362
HALLMARK_P53_PATHWAY	-3.35285	0.000444177	0.00740294	0.235026	0.407164	0.792934	-2.61741	0.00462449	0.0462449	1.33278	0.0917468	0.417031	-2.23678	0.0129814	0.0811337	-1.83088	0.0339919	0.397675	-0.438733	0.330567	0.681681	2.12836	0.0170084	0.141736	-0.883072	0.188906	0.622283	2.26501	0.0120811	0.0735621	0.0837895	0.466636	0.999463	-3.0238	0.00134361	0.0534903
HALLMARK_TNFA_SIGNALING_VIA_NFKB	-2.6707	0.00399045	0.0285032	-0.267847	0.394514	0.999943	-2.17803	0.0150609	0.0832826	4.01573	3.86199e-05	0.00193099	-0.431713	0.333118	0.68925	-1.2727	0.102021	0.478817	-0.410539	0.340841	0.681681	0.594925	0.276161	0.999293	-1.61598	0.0535355	0.446129	2.51952	0.00620197	0.0593302	0.57689	0.282206	0.999463	-2.22179	0.0134917	0.134917
HALLMARK_REACTIVE_OXYGEN_SPECIES_PATHWAY	-2.49805	0.00713519	0.0445949	0.0798812	0.468253	0.792934	-2.17642	0.0162211	0.0832826	0.895597	0.186405	0.501265	-1.62098	0.05451	0.229901	-0.341161	0.36692	0.764391	-0.485238	0.314333	0.681681	0.163796	0.435168	0.999293	-0.750726	0.227368	0.622283	0.705736	0.24121	0.557271	-0.993871	0.161464	0.448511	-1.2108	0.114538	0.566663
HALLMARK_WNT_BETA_CATENIN_SIGNALING	-2.14922	0.0177833	0.0740973	0.538032	0.296422	0.673687	-1.99402	0.0253142	0.115064	-0.149771	0.440708	0.999961	-1.561	0.0617281	0.233502	-0.176749	0.430132	0.79654	-0.462483	0.322775	0.681681	-0.508632	0.306523	0.592279	0.257797	0.398713	0.956926	0.484272	0.315009	0.630018	-1.71261	0.0459177	0.26107	0.229	0.409826	0.940637
HALLMARK_CHOLESTEROL_HOMEOSTASIS	-4.05707	4.17902e-05	0.00208951	4.04619	5.74862e-05	0.00287431	0.95182	0.171436	0.729132	0.310602	0.378312	0.611462	1.22534	0.111322	0.521429	1.17022	0.122437	0.923859	-0.33948	0.367391	0.686054	-3.28246	0.000707214	0.0353607	-2.08431	0.0196604	0.327673	3.85027	0.000102334	0.00511672	-2.40915	0.00871761	0.0871761	1.58793	0.0575266	0.359541
HALLMARK_COAGULATION	-0.750791	0.22677	0.436096	-0.652848	0.257251	0.957	-1.32097	0.0939295	0.276263	0.185299	0.426597	0.646359	-0.753577	0.226068	0.513791	2.12691	0.0172433	0.416244	-0.331074	0.370469	0.686054	0.1188	0.45277	0.999293	0.929411	0.176822	0.956926	-2.35529	0.00968216	0.258149	-1.50678	0.0667637	0.278182	0.207808	0.417791	0.940637
HALLMARK_APOPTOSIS	-0.789841	0.215147	0.430294	0.550215	0.291311	0.673687	0.404848	0.34295	0.99951	1.70015	0.0451262	0.32233	1.10269	0.135572	0.521429	-1.45721	0.0730945	0.478817	-0.257823	0.39837	0.711375	0.369114	0.356162	0.999293	-1.83311	0.033938	0.424225	2.31315	0.0107293	0.0735621	2.08074	0.0192101	0.214864	-1.92118	0.0278687	0.174179
HALLMARK_HYPOXIA	-2.41552	0.00814036	0.0447409	-0.634883	0.263001	0.957	-1.25111	0.105898	0.294161	1.11064	0.13378	0.501265	-1.32004	0.0938837	0.312946	-0.933869	0.175553	0.626975	0.69273	0.244489	0.748298	0.451897	0.325822	0.999293	-2.77312	0.002936	0.0733999	0.772907	0.220101	0.557271	-0.660593	0.254672	0.58585	-1.97315	0.0246617	0.174179
HALLMARK_MYOGENESIS	-3.06045	0.00122274	0.0134484	0.86432	0.194111	0.658347	-2.85045	0.00236076	0.039346	-0.585417	0.279446	0.999961	-2.56689	0.00549644	0.0549644	-1.76081	0.0397675	0.397675	0.661725	0.254421	0.748298	-1.45481	0.0734764	0.261679	0.645445	0.259617	0.956926	1.8688	0.0313976	0.130823	-2.95877	0.0017161	0.0429025	1.9305	0.0274338	0.310429
HALLMARK_MTORC1_SIGNALING	-1.99936	0.0231401	0.0857491	0.954715	0.170243	0.658347	0.935776	0.174992	0.729132	0.465979	0.320749	0.572766	0.645501	0.259495	0.763221	-0.728686	0.233349	0.659018	0.681412	0.248012	0.748298	-2.60183	0.00483308	0.0805513	-3.83645	7.33237e-05	0.00366619	1.82889	0.0341236	0.131244	-1.00671	0.157357	0.448511	0.0212623	0.491524	0.945238
HALLMARK_HEDGEHOG_SIGNALING	-0.575587	0.283908	0.525755	0.637967	0.263339	0.658347	-0.666262	0.254304	0.470934	-1.38889	0.0861679	0.999961	-0.766584	0.223774	0.513791	0.0701169	0.472208	0.999872	-0.14975	0.440828	0.760049	-1.45435	0.0766565	0.261679	0.736931	0.232476	0.956926	-0.293897	0.385236	0.999898	-1.60931	0.0572952	0.278182	1.52764	0.0667259	0.3707
HALLMARK_SPERMATOGENESIS	0.649626	0.258559	0.999958	0.146675	0.441805	0.792934	1.23458	0.109587	0.661527	-0.53811	0.295698	0.999961	1.15519	0.125052	0.521429	-0.530297	0.298392	0.710457	-0.0520235	0.479296	0.798827	0.228998	0.40961	0.999293	-0.995646	0.160611	0.622283	0.292733	0.385116	0.692358	1.47462	0.0713308	0.405861	-1.15731	0.124666	0.566663
HALLMARK_ANDROGEN_RESPONSE	1.38725	0.0835364	0.672822	0.747993	0.227841	0.658347	2.10412	0.0183707	0.253083	0.701949	0.241807	0.503764	2.25899	0.0125481	0.104567	0.95071	0.171541	0.923859	0.464147	0.321554	0.893205	-1.94028	0.0269547	0.173517	-0.734541	0.231783	0.622283	0.324885	0.372825	0.692358	0.364503	0.357959	0.999463	1.58422	0.0574398	0.359541
HALLMARK_APICAL_SURFACE	-0.964745	0.16923	0.36789	-0.416654	0.339291	0.997915	-0.736252	0.232183	0.446507	-0.494171	0.311479	0.999961	-1.26377	0.105635	0.330109	-0.346523	0.3651	0.764391	0.371636	0.355742	0.936164	-1.62184	0.0550862	0.229526	-0.466296	0.32154	0.669874	-0.42953	0.334531	0.999898	-2.34723	0.0110987	0.0924896	1.38101	0.0861319	0.43066
HALLMARK_ESTROGEN_RESPONSE_EARLY	-2.96852	0.00161381	0.0134484	1.45263	0.0736869	0.526335	-1.63472	0.0515577	0.184135	0.810607	0.209146	0.501265	-1.51509	0.0653807	0.233502	-1.19437	0.116642	0.486008	0.223677	0.411579	0.998749	-1.73675	0.0417584	0.208792	-1.16896	0.121673	0.593918	2.46655	0.00711963	0.0593302	-2.15004	0.0161692	0.115494	0.975417	0.165058	0.634838

## Sheet: up in WT Pio v Control
Term_ID	HFD_Pio_WT-HFD_WT_mean_logFC	HFD_Pio_WT-HFD_WT_P.value	HFD_Pio_WT-HFD_WT_FDR	HFD_Pio_WT-Pio_WT_mean_logFC	HFD_Pio_WT-Pio_WT_P.value	HFD_Pio_WT-Pio_WT_FDR	HFD_WT-Control_WT_mean_logFC	HFD_WT-Control_WT_P.value	HFD_WT-Control_WT_FDR	Pio_WT-Control_WT_mean_logFC	Pio_WT-Control_WT_P.value	Pio_WT-Control_WT_FDR
HALLMARK_UV_RESPONSE_DN	2.41258	0.00827556	0.0827556	-1.61127	0.0541771	0.229526	0.324599	0.372879	0.956926	3.74339	0.000112111	0.00419623
HALLMARK_FATTY_ACID_METABOLISM	4.61939	3.12173e-06	9.38241e-05	3.47053	0.000303319	0.00393146	3.46823	0.000309552	0.0077388	3.63911	0.000167849	0.00419623
HALLMARK_ADIPOGENESIS	4.04263	3.28216e-05	0.000547027	0.459257	0.323158	0.999293	0.545231	0.292956	0.956926	3.09414	0.00107571	0.0179286
HALLMARK_MYOGENESIS	0.661725	0.254421	0.748298	-1.45481	0.0734764	0.261679	0.645445	0.259617	0.956926	1.9305	0.0274338	0.310429
HALLMARK_KRAS_SIGNALING_UP	1.56823	0.0591039	0.3694	-1.41865	0.0785037	0.261679	-0.718589	0.236468	0.622283	1.81915	0.0350764	0.310429
HALLMARK_BILE_ACID_METABOLISM	1.69948	0.0453525	0.323946	3.4707	0.000314517	0.00393146	4.0217	4.0715e-05	0.00203575	1.79241	0.0372515	0.310429
HALLMARK_CHOLESTEROL_HOMEOSTASIS	-0.33948	0.367391	0.686054	-3.28246	0.000707214	0.0353607	-2.08431	0.0196604	0.327673	1.58793	0.0575266	0.359541
HALLMARK_ANDROGEN_RESPONSE	0.464147	0.321554	0.893205	-1.94028	0.0269547	0.173517	-0.734541	0.231783	0.622283	1.58422	0.0574398	0.359541
HALLMARK_HEDGEHOG_SIGNALING	-0.14975	0.440828	0.760049	-1.45435	0.0766565	0.261679	0.736931	0.232476	0.956926	1.52764	0.0667259	0.3707
HALLMARK_APICAL_SURFACE	0.371636	0.355742	0.936164	-1.62184	0.0550862	0.229526	-0.466296	0.32154	0.669874	1.38101	0.0861319	0.43066
HALLMARK_PEROXISOME	2.798	0.00283409	0.0354262	2.9617	0.00174403	0.0174403	1.86347	0.0321524	0.413275	1.1599	0.123787	0.562668
HALLMARK_EPITHELIAL_MESENCHYMAL_TRANSITION	1.4008	0.081154	0.446722	0.890756	0.186906	0.934531	0.705297	0.240586	0.956926	0.979161	0.164145	0.634838
HALLMARK_ESTROGEN_RESPONSE_EARLY	0.223677	0.411579	0.998749	-1.73675	0.0417584	0.208792	-1.16896	0.121673	0.593918	0.975417	0.165058	0.634838
HALLMARK_INTERFERON_ALPHA_RESPONSE	-3.03183	0.0013987	0.0308507	-2.05592	0.0205848	0.173517	1.84858	0.033062	0.413275	0.87057	0.192571	0.687755
HALLMARK_ANGIOGENESIS	1.30699	0.0988619	0.449372	-0.505065	0.307985	0.592279	-1.15034	0.12816	0.593918	0.631815	0.265403	0.884676
HALLMARK_TGF_BETA_SIGNALING	1.01838	0.155507	0.598103	-0.368491	0.356652	0.636878	-0.817557	0.207779	0.622283	0.508165	0.306253	0.909446
HALLMARK_IL2_STAT5_SIGNALING	-0.665994	0.252945	0.602251	-1.23309	0.109237	0.331945	-0.333414	0.369519	0.684295	0.409487	0.341226	0.909446
HALLMARK_ALLOGRAFT_REJECTION	-1.99258	0.0236255	0.132839	-2.12789	0.0170992	0.173517	0.250645	0.401134	0.956926	0.406807	0.342229	0.909446
HALLMARK_INTERFERON_GAMMA_RESPONSE	-3.04475	0.00125124	0.0308507	-2.80629	0.00263625	0.0659062	0.260237	0.397412	0.956926	0.397569	0.34559	0.909446
HALLMARK_WNT_BETA_CATENIN_SIGNALING	-0.462483	0.322775	0.681681	-0.508632	0.306523	0.592279	0.257797	0.398713	0.956926	0.229	0.409826	0.940637
HALLMARK_COAGULATION	-0.331074	0.370469	0.686054	0.1188	0.45277	0.999293	0.929411	0.176822	0.956926	0.207808	0.417791	0.940637
HALLMARK_PANCREAS_BETA_CELLS	-1.30552	0.100683	0.445086	-0.54774	0.293835	0.592279	0.881591	0.192305	0.956926	0.195504	0.423414	0.940637
HALLMARK_ESTROGEN_RESPONSE_LATE	-0.688388	0.245872	0.602251	-1.2142	0.112861	0.331945	-0.591192	0.277426	0.633847	0.169666	0.432693	0.940637
HALLMARK_OXIDATIVE_PHOSPHORYLATION	4.54639	3.75296e-06	9.38241e-05	4.06439	2.93462e-05	0.00092226	0.0305026	0.487842	0.999927	0.0574716	0.4771	0.945238
HALLMARK_PROTEIN_SECRETION	1.08402	0.140037	0.583488	-0.00172829	0.499312	0.832186	-1.12757	0.130662	0.593918	0.0320061	0.487255	0.945238
HALLMARK_MTORC1_SIGNALING	0.681412	0.248012	0.748298	-2.60183	0.00483308	0.0805513	-3.83645	7.33237e-05	0.00366619	0.0212623	0.491524	0.945238

## Sheet: up in WT Pio-HFD v HFD
Term_ID	HFD_Pio_WT-HFD_WT_mean_logFC	HFD_Pio_WT-HFD_WT_P.value	HFD_Pio_WT-HFD_WT_FDR	HFD_Pio_WT-Pio_WT_mean_logFC	HFD_Pio_WT-Pio_WT_P.value	HFD_Pio_WT-Pio_WT_FDR	HFD_WT-Control_WT_mean_logFC	HFD_WT-Control_WT_P.value	HFD_WT-Control_WT_FDR	Pio_WT-Control_WT_mean_logFC	Pio_WT-Control_WT_P.value	Pio_WT-Control_WT_FDR
HALLMARK_FATTY_ACID_METABOLISM	4.61939	3.12173e-06	9.38241e-05	3.47053	0.000303319	0.00393146	3.46823	0.000309552	0.0077388	3.63911	0.000167849	0.00419623
HALLMARK_OXIDATIVE_PHOSPHORYLATION	4.54639	3.75296e-06	9.38241e-05	4.06439	2.93462e-05	0.00092226	0.0305026	0.487842	0.999927	0.0574716	0.4771	0.945238
HALLMARK_ADIPOGENESIS	4.04263	3.28216e-05	0.000547027	0.459257	0.323158	0.999293	0.545231	0.292956	0.956926	3.09414	0.00107571	0.0179286
HALLMARK_PEROXISOME	2.798	0.00283409	0.0354262	2.9617	0.00174403	0.0174403	1.86347	0.0321524	0.413275	1.1599	0.123787	0.562668
HALLMARK_UV_RESPONSE_DN	2.41258	0.00827556	0.0827556	-1.61127	0.0541771	0.229526	0.324599	0.372879	0.956926	3.74339	0.000112111	0.00419623
HALLMARK_GLYCOLYSIS	1.77036	0.0387919	0.323266	0.424746	0.335649	0.999293	-1.70662	0.0444141	0.444141	-0.255733	0.399157	0.882362
HALLMARK_BILE_ACID_METABOLISM	1.69948	0.0453525	0.323946	3.4707	0.000314517	0.00393146	4.0217	4.0715e-05	0.00203575	1.79241	0.0372515	0.310429
HALLMARK_KRAS_SIGNALING_UP	1.56823	0.0591039	0.3694	-1.41865	0.0785037	0.261679	-0.718589	0.236468	0.622283	1.81915	0.0350764	0.310429
HALLMARK_EPITHELIAL_MESENCHYMAL_TRANSITION	1.4008	0.081154	0.446722	0.890756	0.186906	0.934531	0.705297	0.240586	0.956926	0.979161	0.164145	0.634838
HALLMARK_XENOBIOTIC_METABOLISM	1.34726	0.0893444	0.446722	4.00713	3.68904e-05	0.00092226	1.27142	0.102183	0.956926	-1.31213	0.0951352	0.528529
HALLMARK_ANGIOGENESIS	1.30699	0.0988619	0.449372	-0.505065	0.307985	0.592279	-1.15034	0.12816	0.593918	0.631815	0.265403	0.884676
HALLMARK_PROTEIN_SECRETION	1.08402	0.140037	0.583488	-0.00172829	0.499312	0.832186	-1.12757	0.130662	0.593918	0.0320061	0.487255	0.945238
HALLMARK_TGF_BETA_SIGNALING	1.01838	0.155507	0.598103	-0.368491	0.356652	0.636878	-0.817557	0.207779	0.622283	0.508165	0.306253	0.909446
HALLMARK_NOTCH_SIGNALING	0.944531	0.17429	0.622464	0.907195	0.183959	0.934531	-0.607263	0.272956	0.633847	-0.417464	0.338893	0.882362
HALLMARK_HYPOXIA	0.69273	0.244489	0.748298	0.451897	0.325822	0.999293	-2.77312	0.002936	0.0733999	-1.97315	0.0246617	0.174179
HALLMARK_MTORC1_SIGNALING	0.681412	0.248012	0.748298	-2.60183	0.00483308	0.0805513	-3.83645	7.33237e-05	0.00366619	0.0212623	0.491524	0.945238
HALLMARK_MYOGENESIS	0.661725	0.254421	0.748298	-1.45481	0.0734764	0.261679	0.645445	0.259617	0.956926	1.9305	0.0274338	0.310429
HALLMARK_ANDROGEN_RESPONSE	0.464147	0.321554	0.893205	-1.94028	0.0269547	0.173517	-0.734541	0.231783	0.622283	1.58422	0.0574398	0.359541
HALLMARK_APICAL_SURFACE	0.371636	0.355742	0.936164	-1.62184	0.0550862	0.229526	-0.466296	0.32154	0.669874	1.38101	0.0861319	0.43066
HALLMARK_ESTROGEN_RESPONSE_EARLY	0.223677	0.411579	0.998749	-1.73675	0.0417584	0.208792	-1.16896	0.121673	0.593918	0.975417	0.165058	0.634838

## Sheet: down in WT Pio v Control
Term_ID	HFD_Pio_WT-HFD_WT_mean_logFC	HFD_Pio_WT-HFD_WT_P.value	HFD_Pio_WT-HFD_WT_FDR	HFD_Pio_WT-Pio_WT_mean_logFC	HFD_Pio_WT-Pio_WT_P.value	HFD_Pio_WT-Pio_WT_FDR	HFD_WT-Control_WT_mean_logFC	HFD_WT-Control_WT_P.value	HFD_WT-Control_WT_FDR	Pio_WT-Control_WT_mean_logFC	Pio_WT-Control_WT_P.value	Pio_WT-Control_WT_FDR
HALLMARK_P53_PATHWAY	-0.438733	0.330567	0.681681	2.12836	0.0170084	0.141736	-0.883072	0.188906	0.622283	-3.0238	0.00134361	0.0534903
HALLMARK_UNFOLDED_PROTEIN_RESPONSE	-2.76007	0.00315695	0.0394619	-0.692403	0.244726	0.542478	-1.37845	0.0847595	0.529747	-2.89013	0.00213961	0.0534903
HALLMARK_HEME_METABOLISM	-2.29778	0.0110879	0.0923989	0.926287	0.177466	0.934531	0.51072	0.304934	0.956926	-2.73383	0.00329423	0.0549038
HALLMARK_DNA_REPAIR	-0.974495	0.165422	0.541065	1.86157	0.0319001	0.227858	0.351529	0.362751	0.956926	-2.23794	0.0130781	0.134917
HALLMARK_TNFA_SIGNALING_VIA_NFKB	-0.410539	0.340841	0.681681	0.594925	0.276161	0.999293	-1.61598	0.0535355	0.446129	-2.22179	0.0134917	0.134917
HALLMARK_HYPOXIA	0.69273	0.244489	0.748298	0.451897	0.325822	0.999293	-2.77312	0.002936	0.0733999	-1.97315	0.0246617	0.174179
HALLMARK_UV_RESPONSE_UP	-1.08474	0.139498	0.53653	0.385226	0.35019	0.999293	-0.839015	0.201099	0.622283	-1.95644	0.0257197	0.174179
HALLMARK_APOPTOSIS	-0.257823	0.39837	0.711375	0.369114	0.356162	0.999293	-1.83311	0.033938	0.424225	-1.92118	0.0278687	0.174179
HALLMARK_XENOBIOTIC_METABOLISM	1.34726	0.0893444	0.446722	4.00713	3.68904e-05	0.00092226	1.27142	0.102183	0.956926	-1.31213	0.0951352	0.528529
HALLMARK_REACTIVE_OXYGEN_SPECIES_PATHWAY	-0.485238	0.314333	0.681681	0.163796	0.435168	0.999293	-0.750726	0.227368	0.622283	-1.2108	0.114538	0.566663
HALLMARK_SPERMATOGENESIS	-0.0520235	0.479296	0.798827	0.228998	0.40961	0.999293	-0.995646	0.160611	0.622283	-1.15731	0.124666	0.566663
HALLMARK_PI3K_AKT_MTOR_SIGNALING	-0.944296	0.173141	0.541065	-0.298306	0.38291	0.66019	-0.587241	0.278893	0.633847	-1.04099	0.149701	0.623752
HALLMARK_KRAS_SIGNALING_DN	-0.988681	0.162166	0.541065	-1.17052	0.121842	0.338451	-1.42455	0.0781308	0.529747	-0.943589	0.173435	0.632553
HALLMARK_MYC_TARGETS_V1	-0.734265	0.231632	0.602251	0.0507262	0.479785	0.999293	-0.285713	0.38764	0.692214	-0.891794	0.186564	0.632553
HALLMARK_E2F_TARGETS	-2.04	0.0210488	0.132839	-0.676638	0.24954	0.542478	0.287228	0.387054	0.956926	-0.879871	0.189766	0.632553
HALLMARK_IL6_JAK_STAT3_SIGNALING	-0.847174	0.199163	0.585772	-0.812796	0.20885	0.497262	-0.834868	0.202643	0.622283	-0.694805	0.244157	0.762991
HALLMARK_COMPLEMENT	-1.246	0.106821	0.445086	-1.06761	0.143249	0.376971	-0.354672	0.361531	0.684295	-0.445241	0.328222	0.882362
HALLMARK_NOTCH_SIGNALING	0.944531	0.17429	0.622464	0.907195	0.183959	0.934531	-0.607263	0.272956	0.633847	-0.417464	0.338893	0.882362
HALLMARK_MITOTIC_SPINDLE	-1.98603	0.023911	0.132839	-1.92133	0.0277628	0.173517	-0.547611	0.292159	0.635128	-0.414974	0.339222	0.882362
HALLMARK_G2M_CHECKPOINT	-2.92244	0.00185104	0.0308507	-1.99527	0.023399	0.173517	0.365248	0.357584	0.956926	-0.36619	0.357226	0.882362
HALLMARK_GLYCOLYSIS	1.77036	0.0387919	0.323266	0.424746	0.335649	0.999293	-1.70662	0.0444141	0.444141	-0.255733	0.399157	0.882362
HALLMARK_APICAL_JUNCTION	-2.36529	0.00932841	0.0923989	-1.74636	0.0408909	0.208792	0.248636	0.401909	0.956926	-0.243669	0.403828	0.882362
HALLMARK_MYC_TARGETS_V2	-1.5243	0.0651309	0.325655	-0.425039	0.335832	0.62191	0.984586	0.163702	0.956926	-0.238702	0.405886	0.882362
HALLMARK_INFLAMMATORY_RESPONSE	-0.774226	0.21973	0.602251	-0.844582	0.199535	0.497262	-0.399461	0.344933	0.684295	-0.172775	0.431478	0.898912

## Sheet: down in WT Pio-HFD v HFD
Term_ID	HFD_Pio_WT-HFD_WT_mean_logFC	HFD_Pio_WT-HFD_WT_P.value	HFD_Pio_WT-HFD_WT_FDR	HFD_Pio_WT-Pio_WT_mean_logFC	HFD_Pio_WT-Pio_WT_P.value	HFD_Pio_WT-Pio_WT_FDR	HFD_WT-Control_WT_mean_logFC	HFD_WT-Control_WT_P.value	HFD_WT-Control_WT_FDR	Pio_WT-Control_WT_mean_logFC	Pio_WT-Control_WT_P.value	Pio_WT-Control_WT_FDR
HALLMARK_INTERFERON_GAMMA_RESPONSE	-3.04475	0.00125124	0.0308507	-2.80629	0.00263625	0.0659062	0.260237	0.397412	0.956926	0.397569	0.34559	0.909446
HALLMARK_INTERFERON_ALPHA_RESPONSE	-3.03183	0.0013987	0.0308507	-2.05592	0.0205848	0.173517	1.84858	0.033062	0.413275	0.87057	0.192571	0.687755
HALLMARK_G2M_CHECKPOINT	-2.92244	0.00185104	0.0308507	-1.99527	0.023399	0.173517	0.365248	0.357584	0.956926	-0.36619	0.357226	0.882362
HALLMARK_UNFOLDED_PROTEIN_RESPONSE	-2.76007	0.00315695	0.0394619	-0.692403	0.244726	0.542478	-1.37845	0.0847595	0.529747	-2.89013	0.00213961	0.0534903
HALLMARK_APICAL_JUNCTION	-2.36529	0.00932841	0.0923989	-1.74636	0.0408909	0.208792	0.248636	0.401909	0.956926	-0.243669	0.403828	0.882362
HALLMARK_HEME_METABOLISM	-2.29778	0.0110879	0.0923989	0.926287	0.177466	0.934531	0.51072	0.304934	0.956926	-2.73383	0.00329423	0.0549038
HALLMARK_E2F_TARGETS	-2.04	0.0210488	0.132839	-0.676638	0.24954	0.542478	0.287228	0.387054	0.956926	-0.879871	0.189766	0.632553
HALLMARK_ALLOGRAFT_REJECTION	-1.99258	0.0236255	0.132839	-2.12789	0.0170992	0.173517	0.250645	0.401134	0.956926	0.406807	0.342229	0.909446
HALLMARK_MITOTIC_SPINDLE	-1.98603	0.023911	0.132839	-1.92133	0.0277628	0.173517	-0.547611	0.292159	0.635128	-0.414974	0.339222	0.882362
HALLMARK_MYC_TARGETS_V2	-1.5243	0.0651309	0.325655	-0.425039	0.335832	0.62191	0.984586	0.163702	0.956926	-0.238702	0.405886	0.882362
HALLMARK_PANCREAS_BETA_CELLS	-1.30552	0.100683	0.445086	-0.54774	0.293835	0.592279	0.881591	0.192305	0.956926	0.195504	0.423414	0.940637
HALLMARK_COMPLEMENT	-1.246	0.106821	0.445086	-1.06761	0.143249	0.376971	-0.354672	0.361531	0.684295	-0.445241	0.328222	0.882362
HALLMARK_UV_RESPONSE_UP	-1.08474	0.139498	0.53653	0.385226	0.35019	0.999293	-0.839015	0.201099	0.622283	-1.95644	0.0257197	0.174179
HALLMARK_KRAS_SIGNALING_DN	-0.988681	0.162166	0.541065	-1.17052	0.121842	0.338451	-1.42455	0.0781308	0.529747	-0.943589	0.173435	0.632553
HALLMARK_DNA_REPAIR	-0.974495	0.165422	0.541065	1.86157	0.0319001	0.227858	0.351529	0.362751	0.956926	-2.23794	0.0130781	0.134917
HALLMARK_PI3K_AKT_MTOR_SIGNALING	-0.944296	0.173141	0.541065	-0.298306	0.38291	0.66019	-0.587241	0.278893	0.633847	-1.04099	0.149701	0.623752
HALLMARK_IL6_JAK_STAT3_SIGNALING	-0.847174	0.199163	0.585772	-0.812796	0.20885	0.497262	-0.834868	0.202643	0.622283	-0.694805	0.244157	0.762991
HALLMARK_INFLAMMATORY_RESPONSE	-0.774226	0.21973	0.602251	-0.844582	0.199535	0.497262	-0.399461	0.344933	0.684295	-0.172775	0.431478	0.898912
HALLMARK_MYC_TARGETS_V1	-0.734265	0.231632	0.602251	0.0507262	0.479785	0.999293	-0.285713	0.38764	0.692214	-0.891794	0.186564	0.632553
HALLMARK_ESTROGEN_RESPONSE_LATE	-0.688388	0.245872	0.602251	-1.2142	0.112861	0.331945	-0.591192	0.277426	0.633847	0.169666	0.432693	0.940637
HALLMARK_IL2_STAT5_SIGNALING	-0.665994	0.252945	0.602251	-1.23309	0.109237	0.331945	-0.333414	0.369519	0.684295	0.409487	0.341226	0.909446
HALLMARK_REACTIVE_OXYGEN_SPECIES_PATHWAY	-0.485238	0.314333	0.681681	0.163796	0.435168	0.999293	-0.750726	0.227368	0.622283	-1.2108	0.114538	0.566663
HALLMARK_WNT_BETA_CATENIN_SIGNALING	-0.462483	0.322775	0.681681	-0.508632	0.306523	0.592279	0.257797	0.398713	0.956926	0.229	0.409826	0.940637
HALLMARK_P53_PATHWAY	-0.438733	0.330567	0.681681	2.12836	0.0170084	0.141736	-0.883072	0.188906	0.622283	-3.0238	0.00134361	0.0534903
HALLMARK_TNFA_SIGNALING_VIA_NFKB	-0.410539	0.340841	0.681681	0.594925	0.276161	0.999293	-1.61598	0.0535355	0.446129	-2.22179	0.0134917	0.134917
HALLMARK_CHOLESTEROL_HOMEOSTASIS	-0.33948	0.367391	0.686054	-3.28246	0.000707214	0.0353607	-2.08431	0.0196604	0.327673	1.58793	0.0575266	0.359541
HALLMARK_COAGULATION	-0.331074	0.370469	0.686054	0.1188	0.45277	0.999293	0.929411	0.176822	0.956926	0.207808	0.417791	0.940637
HALLMARK_APOPTOSIS	-0.257823	0.39837	0.711375	0.369114	0.356162	0.999293	-1.83311	0.033938	0.424225	-1.92118	0.0278687	0.174179
HALLMARK_HEDGEHOG_SIGNALING	-0.14975	0.440828	0.760049	-1.45435	0.0766565	0.261679	0.736931	0.232476	0.956926	1.52764	0.0667259	0.3707
HALLMARK_SPERMATOGENESIS	-0.0520235	0.479296	0.798827	0.228998	0.40961	0.999293	-0.995646	0.160611	0.622283	-1.15731	0.124666	0.566663

## Sheet: KO Pio v Control
Term_ID	Pio_KO-Control_KO_mean_logFC	Pio_KO-Control_KO_P.value	Pio_KO-Control_KO_FDR
HALLMARK_COAGULATION	-2.35529	0.00968216	0.258149
HALLMARK_UNFOLDED_PROTEIN_RESPONSE	-2.33254	0.010326	0.258149
HALLMARK_BILE_ACID_METABOLISM	-2.02095	0.0222718	0.371197
HALLMARK_OXIDATIVE_PHOSPHORYLATION	-1.75468	0.040128	0.5016
HALLMARK_PROTEIN_SECRETION	-1.2041	0.115407	0.999898
HALLMARK_PI3K_AKT_MTOR_SIGNALING	-0.894228	0.186179	0.999898
HALLMARK_PANCREAS_BETA_CELLS	-0.845306	0.202646	0.999898
HALLMARK_ANGIOGENESIS	-0.68221	0.249468	0.999898
HALLMARK_MYC_TARGETS_V2	-0.592403	0.277454	0.999898
HALLMARK_FATTY_ACID_METABOLISM	-0.591251	0.277406	0.999898
HALLMARK_XENOBIOTIC_METABOLISM	-0.548819	0.291726	0.999898
HALLMARK_KRAS_SIGNALING_UP	-0.536162	0.296118	0.999898
HALLMARK_ALLOGRAFT_REJECTION	-0.430532	0.33357	0.999898
HALLMARK_APICAL_SURFACE	-0.42953	0.334531	0.999898
HALLMARK_HEDGEHOG_SIGNALING	-0.293897	0.385236	0.999898
HALLMARK_EPITHELIAL_MESENCHYMAL_TRANSITION	-0.216154	0.414508	0.999898
HALLMARK_PEROXISOME	-0.0408868	0.483714	0.999898
HALLMARK_UV_RESPONSE_DN	-0.0398368	0.484127	0.999898
HALLMARK_COMPLEMENT	0.0306659	0.487777	0.759244
HALLMARK_MYC_TARGETS_V1	0.0636544	0.474643	0.759244
HALLMARK_GLYCOLYSIS	0.106427	0.457654	0.759244
HALLMARK_ADIPOGENESIS	0.22338	0.41168	0.709792
HALLMARK_HEME_METABOLISM	0.285486	0.387721	0.692358
HALLMARK_SPERMATOGENESIS	0.292733	0.385116	0.692358
HALLMARK_ANDROGEN_RESPONSE	0.324885	0.372825	0.692358
HALLMARK_WNT_BETA_CATENIN_SIGNALING	0.484272	0.315009	0.630018
HALLMARK_UV_RESPONSE_UP	0.524313	0.300274	0.625571
HALLMARK_DNA_REPAIR	0.55046	0.291256	0.625571
HALLMARK_INFLAMMATORY_RESPONSE	0.690596	0.245199	0.557271
HALLMARK_REACTIVE_OXYGEN_SPECIES_PATHWAY	0.705736	0.24121	0.557271
HALLMARK_KRAS_SIGNALING_DN	0.734859	0.231781	0.557271
HALLMARK_HYPOXIA	0.772907	0.220101	0.557271
HALLMARK_APICAL_JUNCTION	0.962594	0.168266	0.467405
HALLMARK_IL2_STAT5_SIGNALING	1.00082	0.158828	0.467141
HALLMARK_TGF_BETA_SIGNALING	1.25874	0.105808	0.330649
HALLMARK_MITOTIC_SPINDLE	1.33234	0.0917839	0.305946
HALLMARK_INTERFERON_ALPHA_RESPONSE	1.74768	0.0412204	0.147216
HALLMARK_MTORC1_SIGNALING	1.82889	0.0341236	0.131244
HALLMARK_MYOGENESIS	1.8688	0.0313976	0.130823
HALLMARK_NOTCH_SIGNALING	1.92875	0.0294184	0.130823
HALLMARK_IL6_JAK_STAT3_SIGNALING	2.13366	0.0173524	0.0867621
HALLMARK_E2F_TARGETS	2.22845	0.0132412	0.0735621
HALLMARK_P53_PATHWAY	2.26501	0.0120811	0.0735621
HALLMARK_APOPTOSIS	2.31315	0.0107293	0.0735621
HALLMARK_ESTROGEN_RESPONSE_EARLY	2.46655	0.00711963	0.0593302
HALLMARK_TNFA_SIGNALING_VIA_NFKB	2.51952	0.00620197	0.0593302
HALLMARK_ESTROGEN_RESPONSE_LATE	2.72168	0.00347643	0.0434553
HALLMARK_INTERFERON_GAMMA_RESPONSE	3.26142	0.00060646	0.0101077
HALLMARK_G2M_CHECKPOINT	3.31837	0.000501794	0.0101077
HALLMARK_CHOLESTEROL_HOMEOSTASIS	3.85027	0.000102334	0.00511672

## Sheet: KO Pio-HFD v HFD
Term_ID	HFD_Pio_KO-HFD_KO_mean_logFC	HFD_Pio_KO-HFD_KO_P.value	HFD_Pio_KO-HFD_KO_FDR
HALLMARK_BILE_ACID_METABOLISM	-2.00556	0.0231256	0.877328
HALLMARK_MITOTIC_SPINDLE	-1.81616	0.0350931	0.877328
HALLMARK_KRAS_SIGNALING_UP	-1.50137	0.0671707	0.999961
HALLMARK_HEDGEHOG_SIGNALING	-1.38889	0.0861679	0.999961
HALLMARK_G2M_CHECKPOINT	-1.09129	0.137955	0.999961
HALLMARK_E2F_TARGETS	-0.748955	0.227196	0.999961
HALLMARK_PANCREAS_BETA_CELLS	-0.727311	0.23626	0.999961
HALLMARK_PI3K_AKT_MTOR_SIGNALING	-0.688607	0.245995	0.999961
HALLMARK_MYOGENESIS	-0.585417	0.279446	0.999961
HALLMARK_SPERMATOGENESIS	-0.53811	0.295698	0.999961
HALLMARK_APICAL_SURFACE	-0.494171	0.311479	0.999961
HALLMARK_APICAL_JUNCTION	-0.192549	0.423724	0.999961
HALLMARK_WNT_BETA_CATENIN_SIGNALING	-0.149771	0.440708	0.999961
HALLMARK_NOTCH_SIGNALING	-0.0817057	0.467586	0.999961
HALLMARK_UV_RESPONSE_DN	0.0567339	0.477401	0.663057
HALLMARK_ADIPOGENESIS	0.11038	0.456083	0.651547
HALLMARK_PEROXISOME	0.135613	0.446138	0.651547
HALLMARK_COAGULATION	0.185299	0.426597	0.646359
HALLMARK_GLYCOLYSIS	0.276066	0.391336	0.611462
HALLMARK_KRAS_SIGNALING_DN	0.28118	0.38947	0.611462
HALLMARK_CHOLESTEROL_HOMEOSTASIS	0.310602	0.378312	0.611462
HALLMARK_PROTEIN_SECRETION	0.407198	0.342296	0.590166
HALLMARK_MTORC1_SIGNALING	0.465979	0.320749	0.572766
HALLMARK_MYC_TARGETS_V2	0.485598	0.314126	0.572766
HALLMARK_EPITHELIAL_MESENCHYMAL_TRANSITION	0.491043	0.31188	0.572766
HALLMARK_UNFOLDED_PROTEIN_RESPONSE	0.642825	0.260538	0.521075
HALLMARK_ANDROGEN_RESPONSE	0.701949	0.241807	0.503764
HALLMARK_ALLOGRAFT_REJECTION	0.737921	0.230582	0.501265
HALLMARK_ESTROGEN_RESPONSE_LATE	0.755796	0.225242	0.501265
HALLMARK_HEME_METABOLISM	0.774834	0.219486	0.501265
HALLMARK_ESTROGEN_RESPONSE_EARLY	0.810607	0.209146	0.501265
HALLMARK_FATTY_ACID_METABOLISM	0.811858	0.208767	0.501265
HALLMARK_XENOBIOTIC_METABOLISM	0.812952	0.208379	0.501265
HALLMARK_REACTIVE_OXYGEN_SPECIES_PATHWAY	0.895597	0.186405	0.501265
HALLMARK_INFLAMMATORY_RESPONSE	0.97505	0.165194	0.501265
HALLMARK_ANGIOGENESIS	1.00546	0.160233	0.501265
HALLMARK_IL2_STAT5_SIGNALING	1.04418	0.148614	0.501265
HALLMARK_HYPOXIA	1.11064	0.13378	0.501265
HALLMARK_DNA_REPAIR	1.18252	0.119122	0.496342
HALLMARK_P53_PATHWAY	1.33278	0.0917468	0.417031
HALLMARK_MYC_TARGETS_V1	1.40286	0.0808655	0.404327
HALLMARK_INTERFERON_ALPHA_RESPONSE	1.42934	0.0774011	0.404327
HALLMARK_COMPLEMENT	1.54587	0.0615458	0.384661
HALLMARK_APOPTOSIS	1.70015	0.0451262	0.32233
HALLMARK_TGF_BETA_SIGNALING	1.73638	0.0428289	0.32233
HALLMARK_IL6_JAK_STAT3_SIGNALING	1.8135	0.0361607	0.32233
HALLMARK_OXIDATIVE_PHOSPHORYLATION	1.99359	0.0236164	0.295205
HALLMARK_INTERFERON_GAMMA_RESPONSE	2.49109	0.00658605	0.109768
HALLMARK_UV_RESPONSE_UP	2.60008	0.00493048	0.109768
HALLMARK_TNFA_SIGNALING_VIA_NFKB	4.01573	3.86199e-05	0.00193099
